# Supplementary material for: Influence of molecular rebinding on the reaction rate of complex formation
Source: Royal Society of Chemistry journal article supplement (doi:10.1039/d1cp02820k), 2021-01-01

$c = 0.01 \text{ nM}; D = 160 \text{ } \mu\text{m}^2/\text{s}; R = 0.1 \text{ } \mu\text{m}; \Delta t = 1.0 \text{ } \mu\text{s} \langle N_{np} \rangle = 660.9 \pm 73.2$

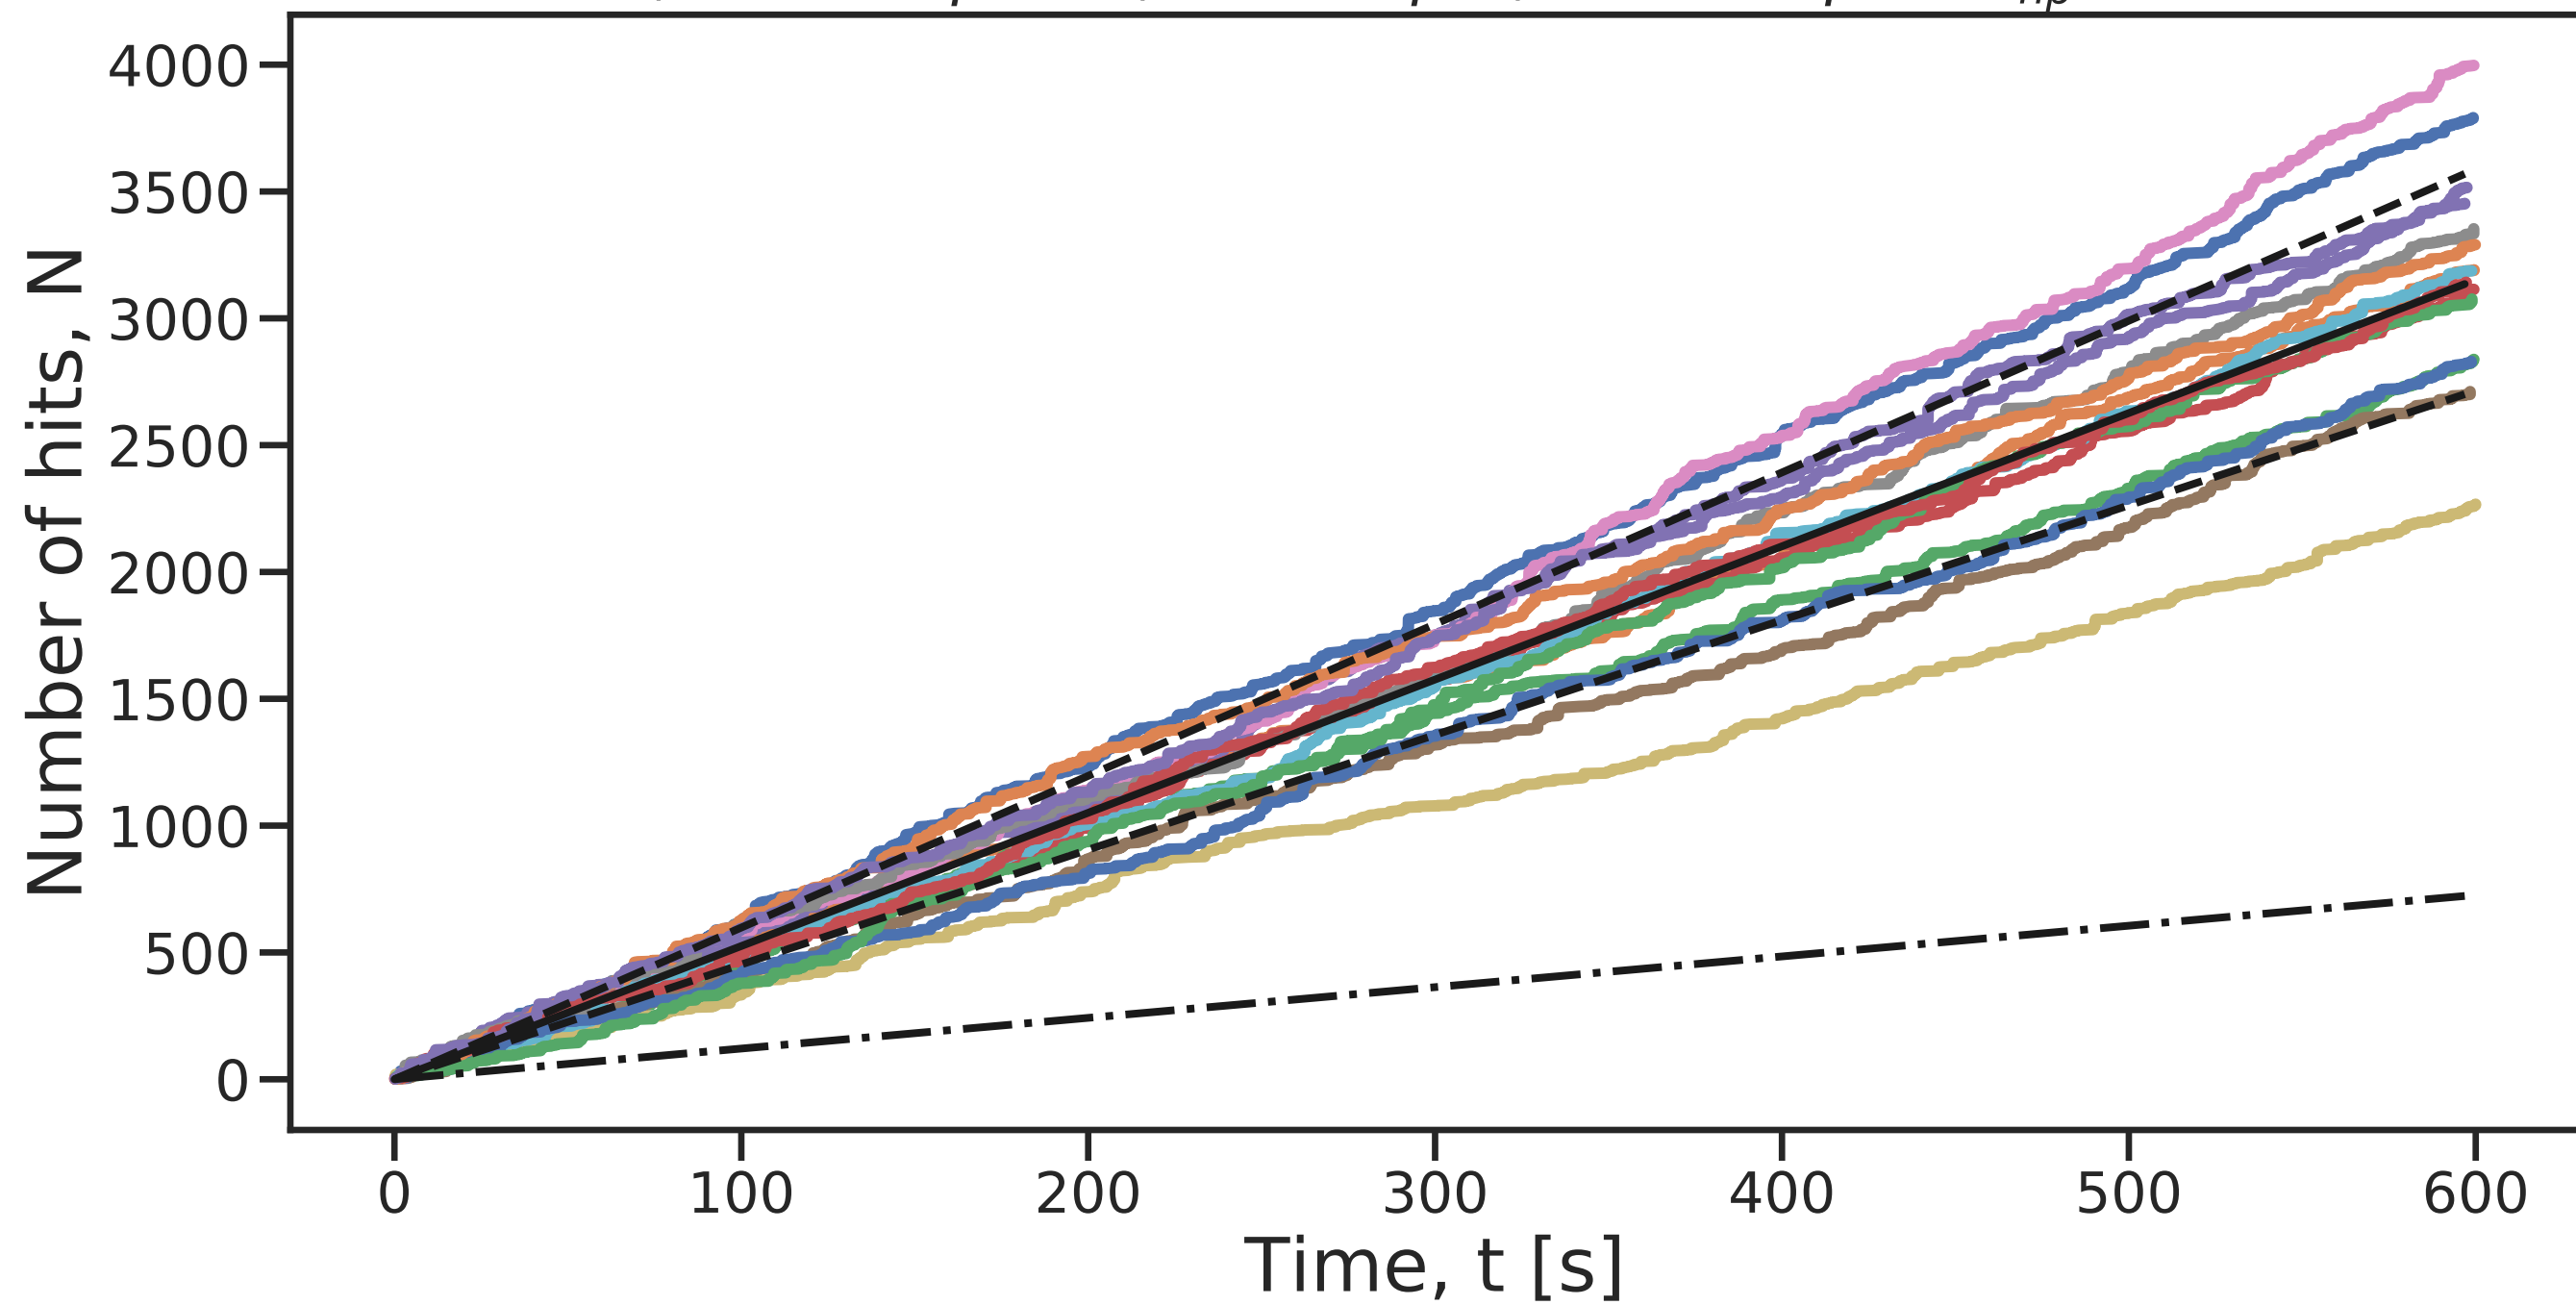

$c = 0.01 \text{ nM}; D = 20 \text{ } \mu\text{m}^2/\text{s}; R = 0.1 \text{ } \mu\text{m}; \Delta t = 1.0 \text{ } \mu\text{s} \langle N_{np} \rangle = 89.8 \pm 13.2$

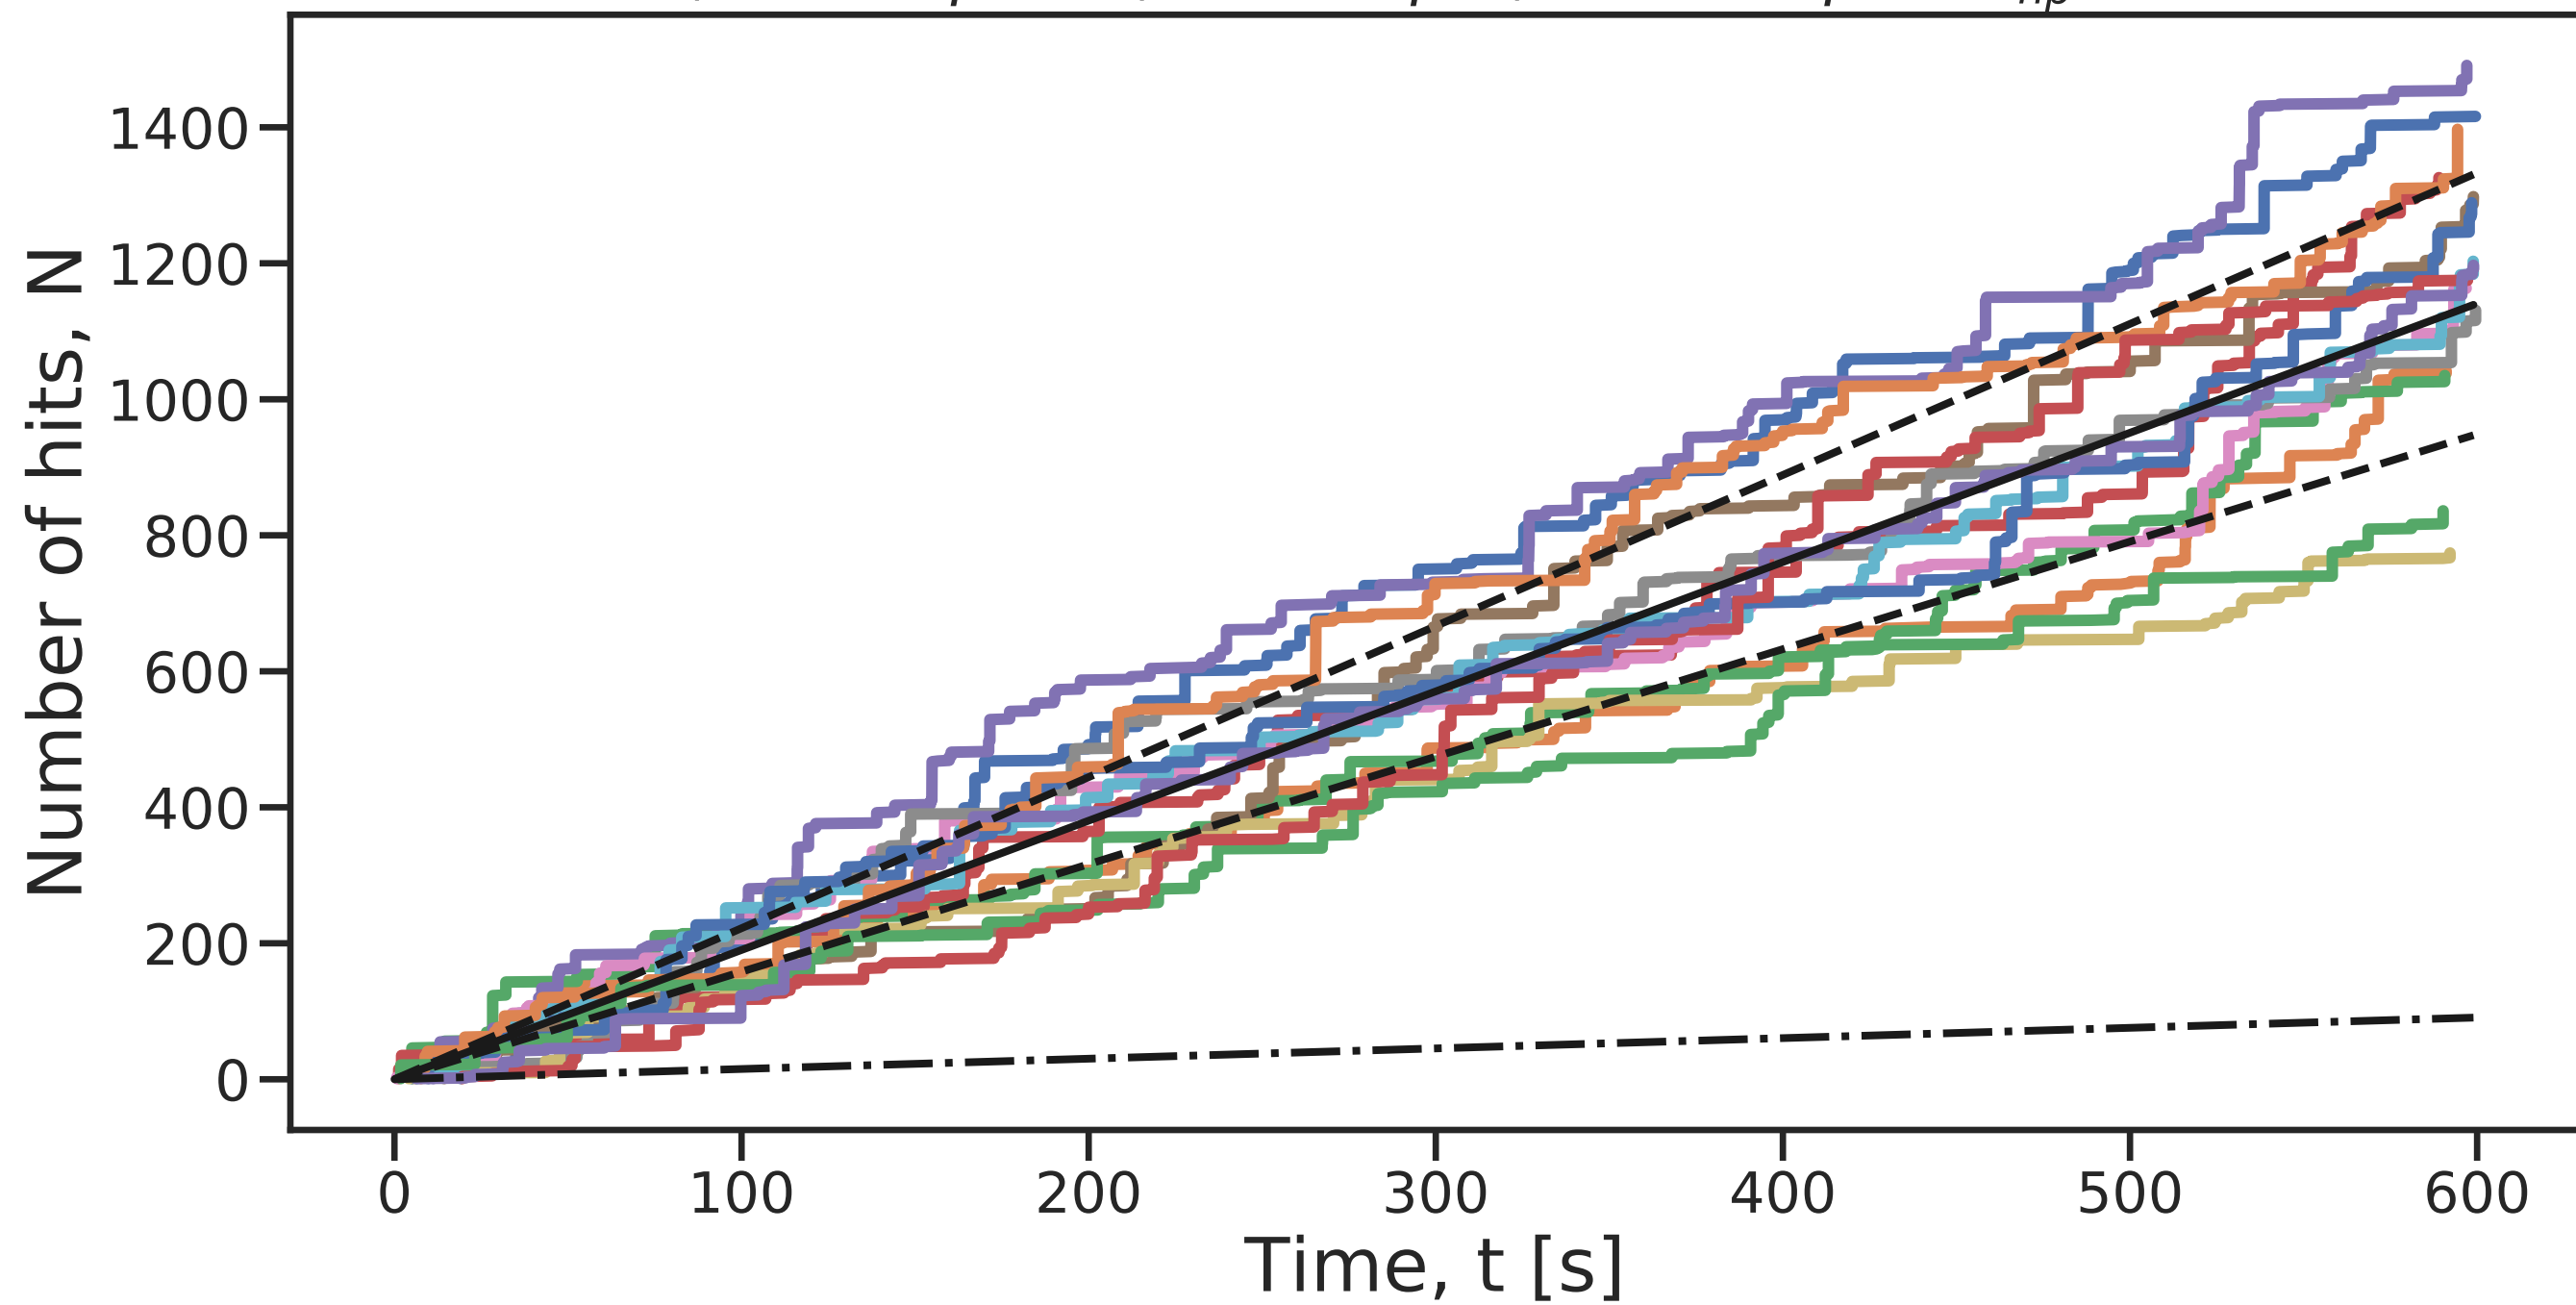

$c = 0.01 \text{ nM}; D = 80 \text{ } \mu\text{m}^2/\text{s}; R = 0.1 \text{ } \mu\text{m}; \Delta t = 1.0 \text{ } \mu\text{s} \langle N_{np} \rangle = 332.7 \pm 39.5$

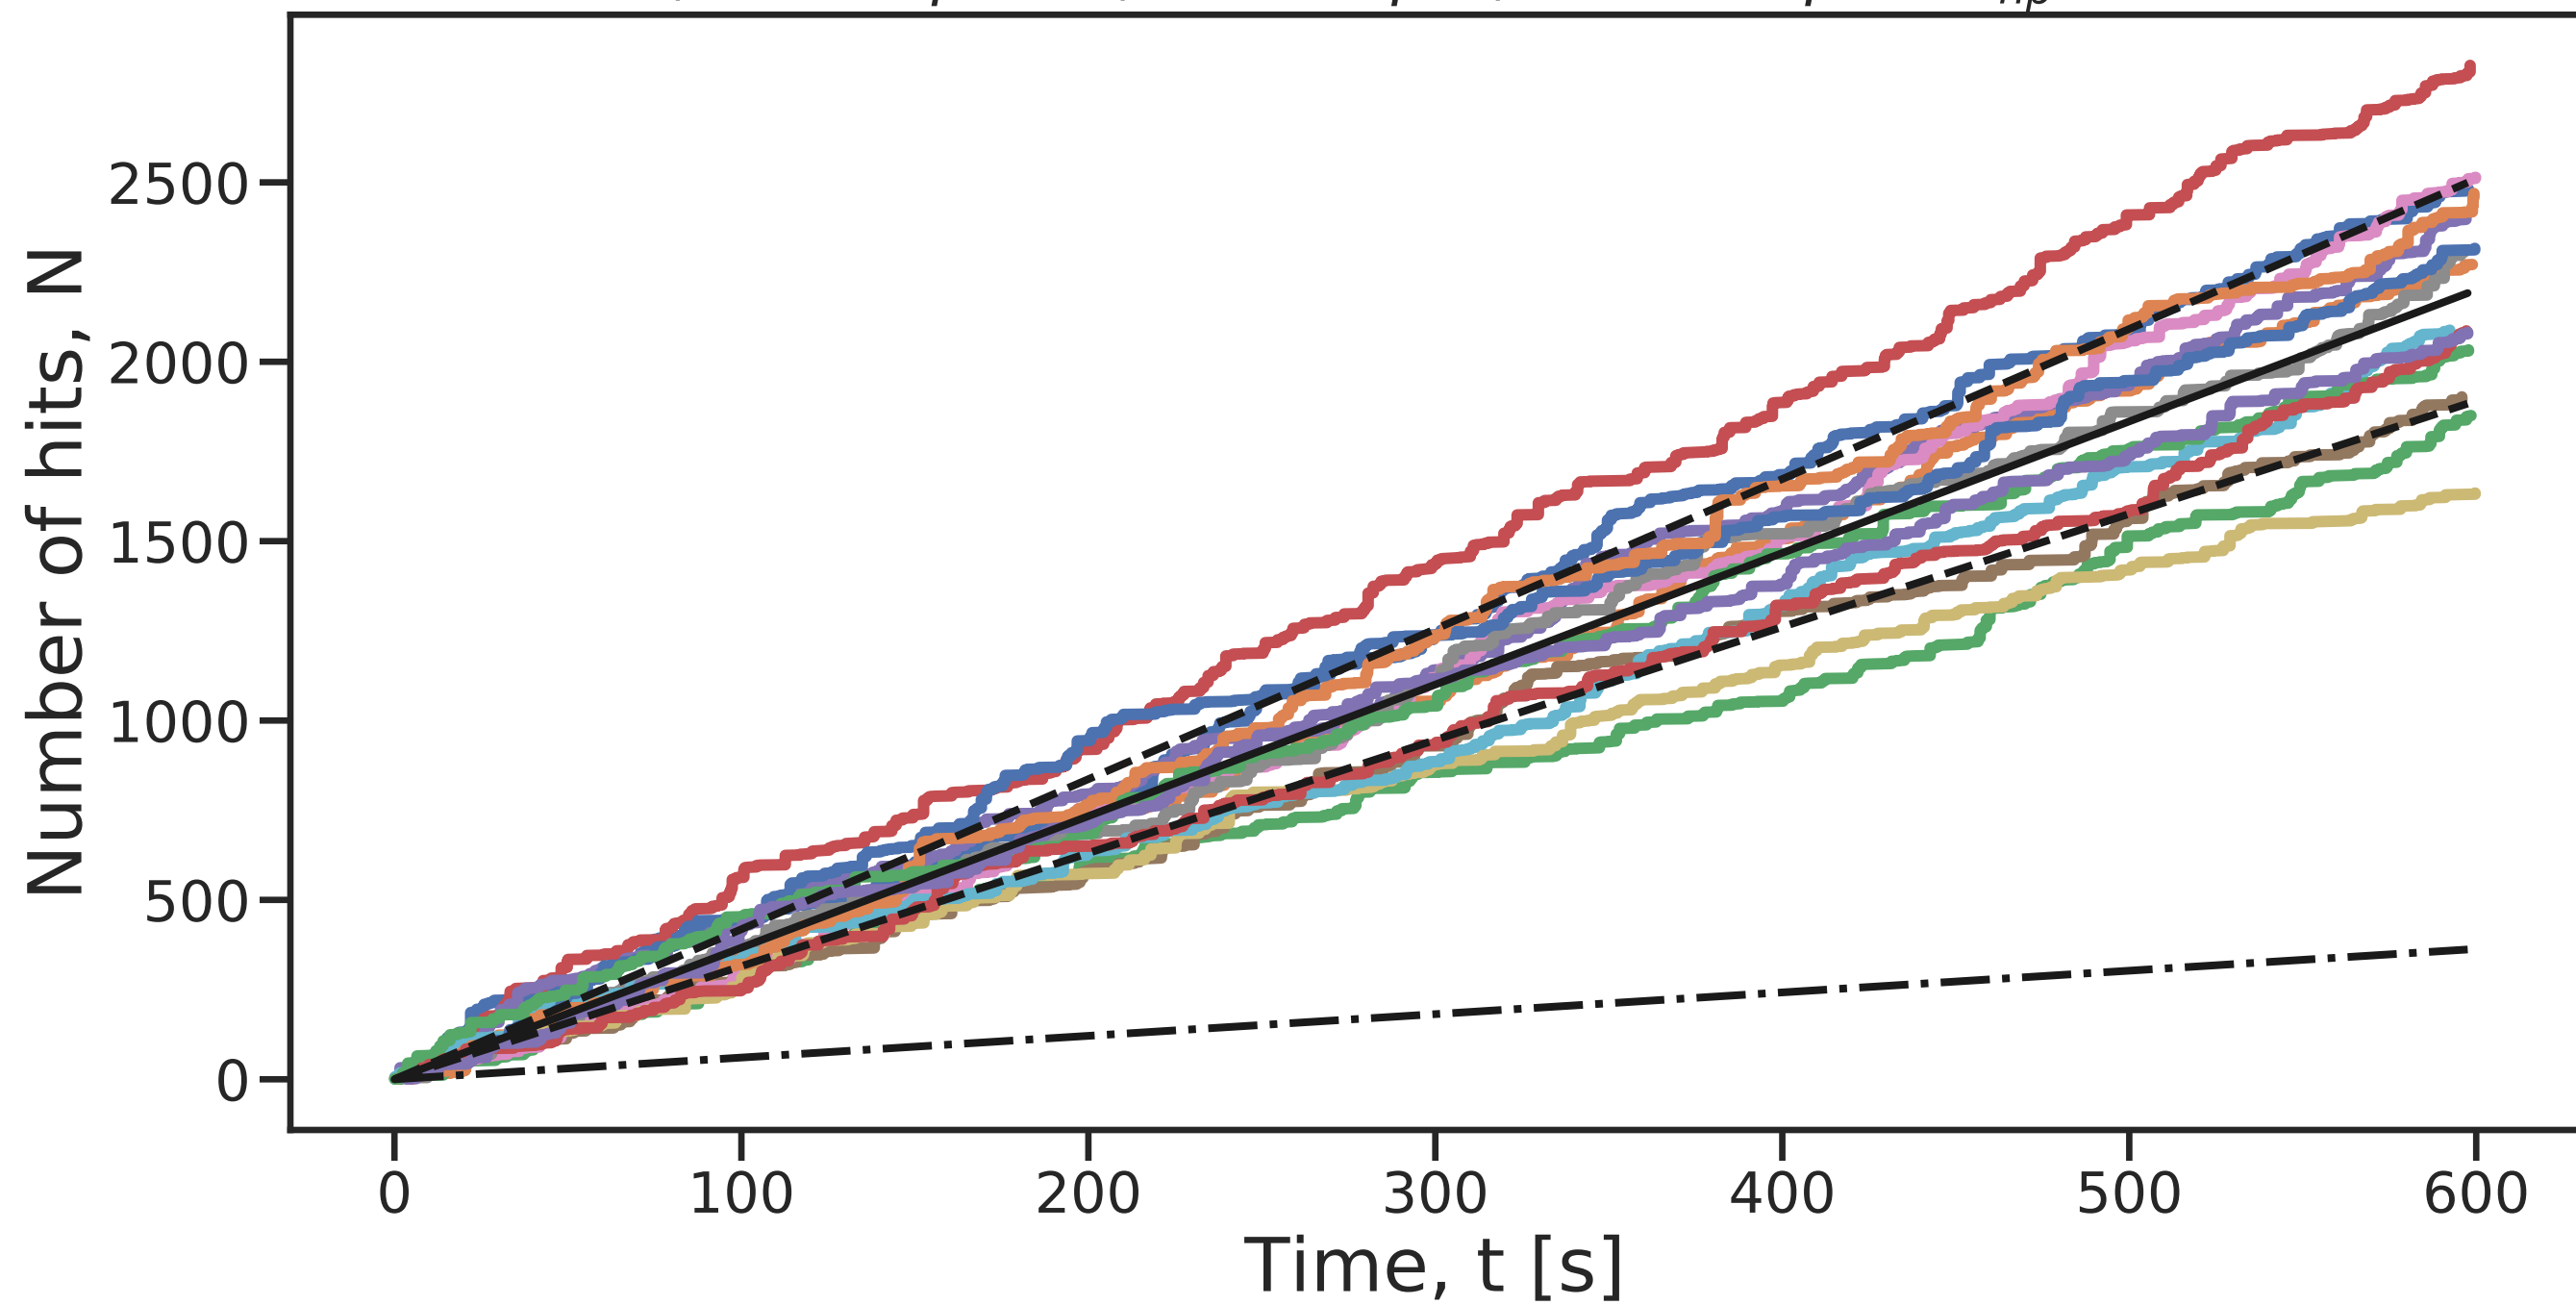

$c = 0.02 \text{ nM}; D = 160 \mu\text{m}^2/\text{s}; R = 0.1 \mu\text{m}; \Delta t = 1.0 \mu\text{s} \langle N_{np} \rangle = 1335.2 \pm 100.5$

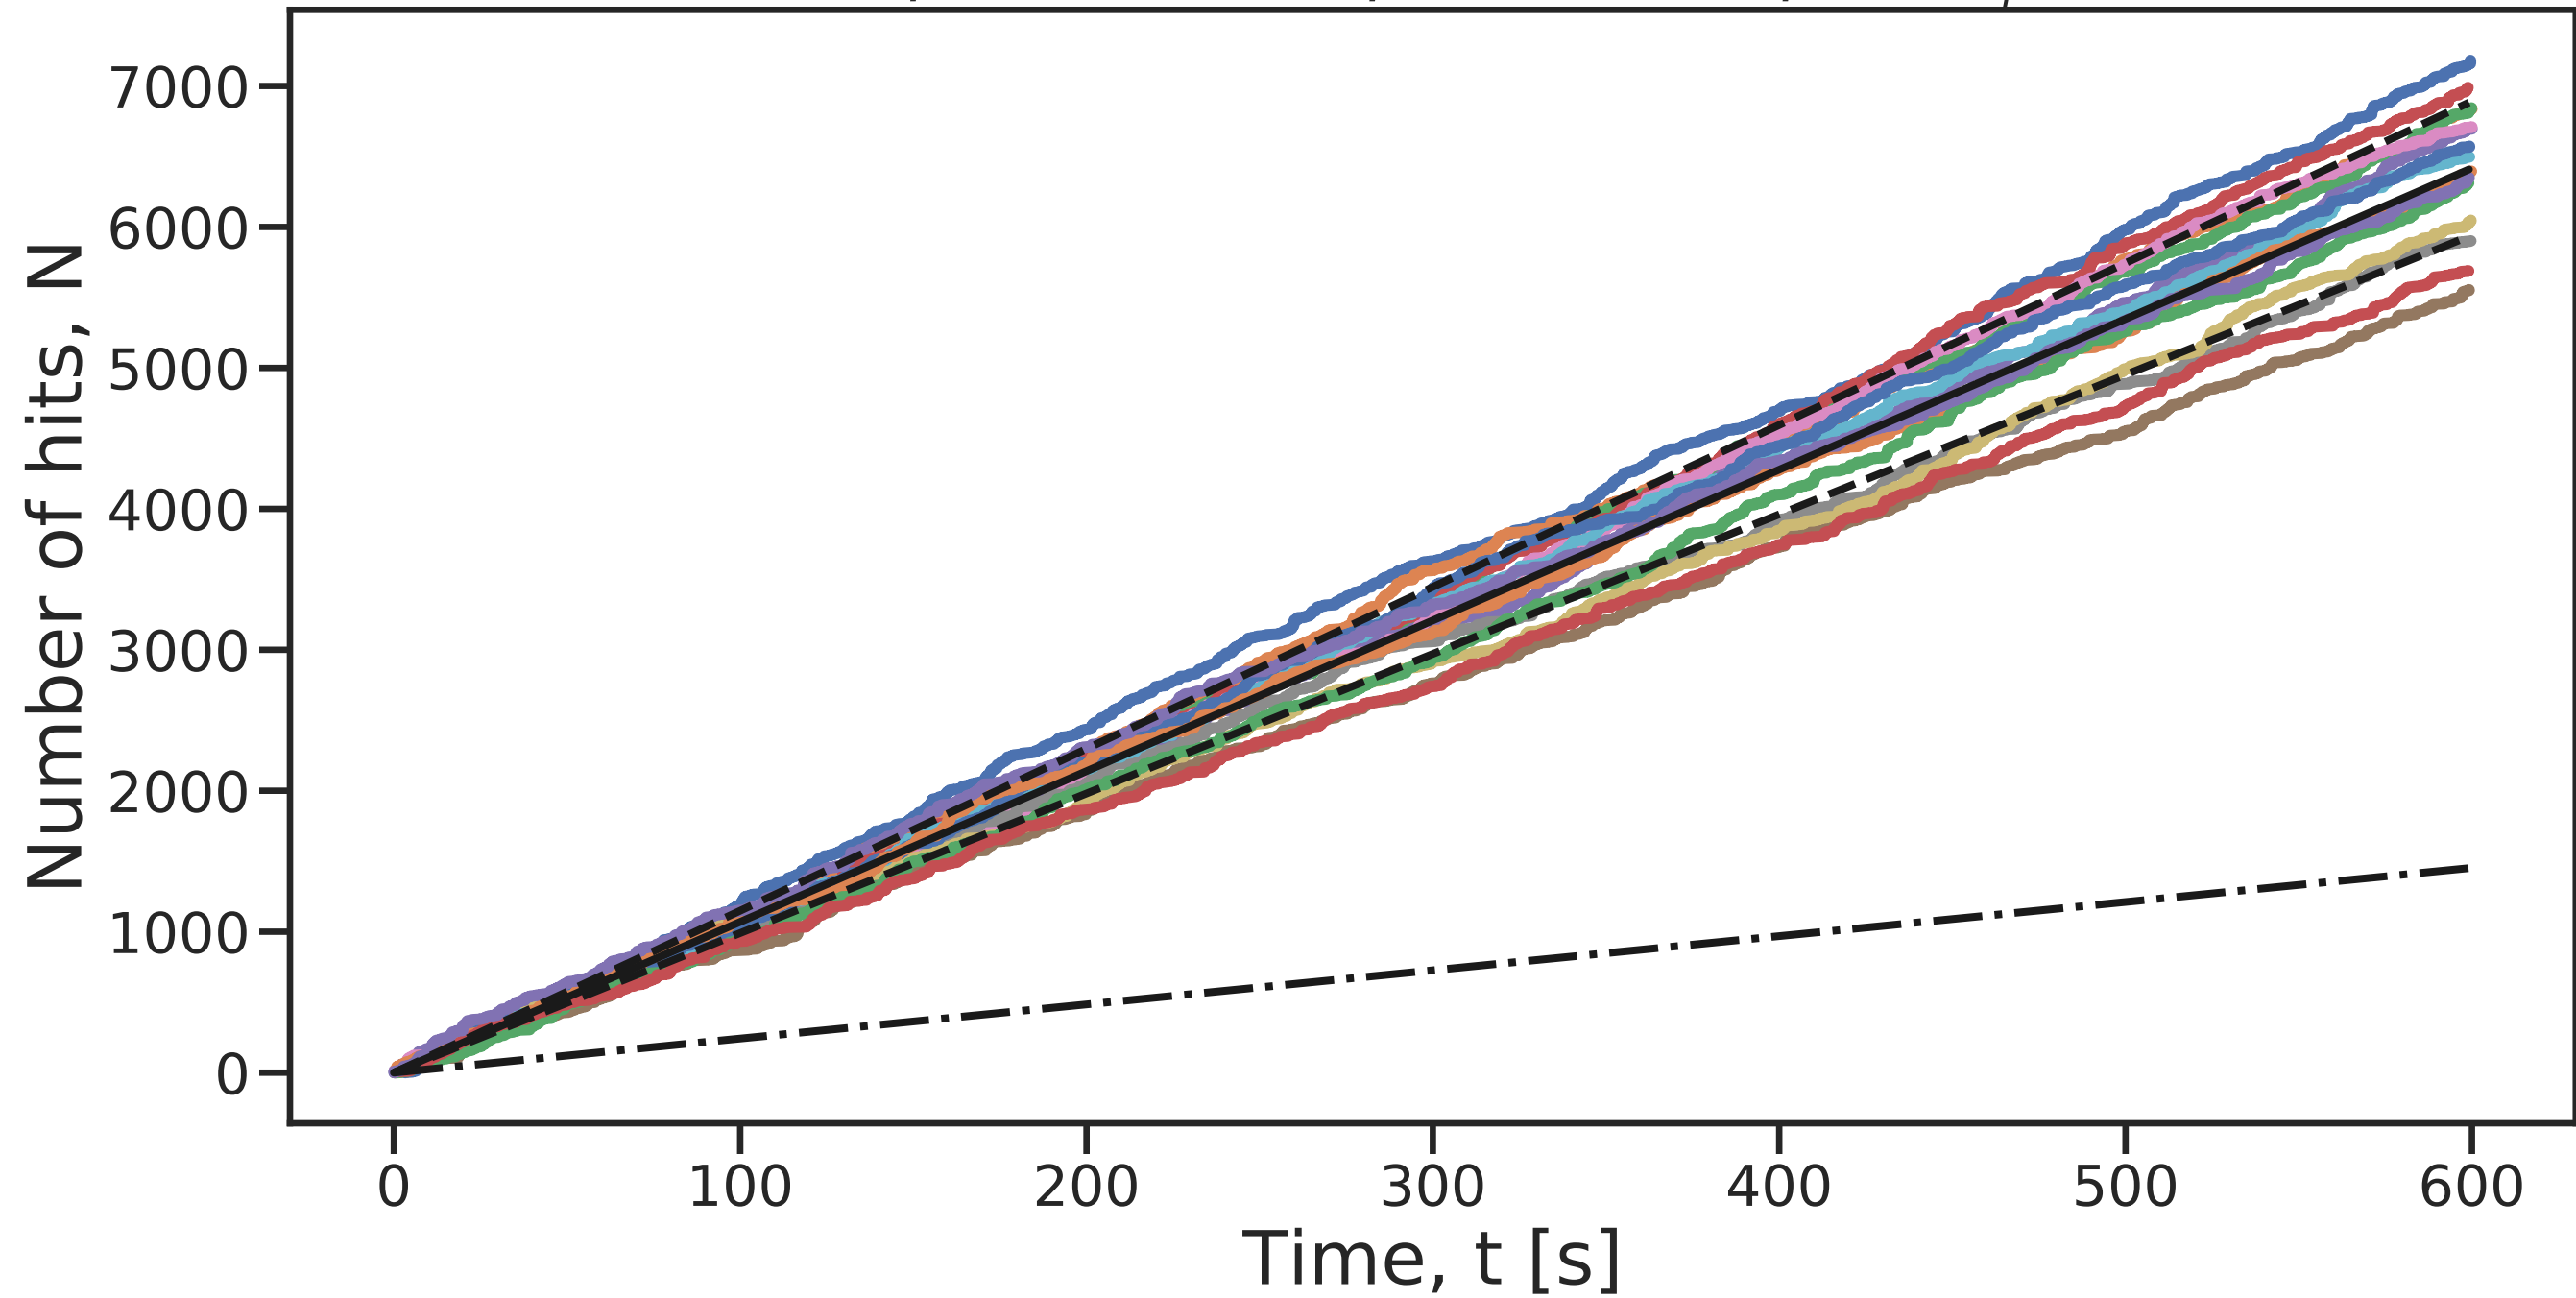



$c = 0.02 \text{ nM}; D = 20 \mu\text{m}^2/\text{s}; R = 0.1 \mu\text{m}; \Delta t = 1.0 \mu\text{s} \langle N_{np} \rangle = 178.2 \pm 18.8$

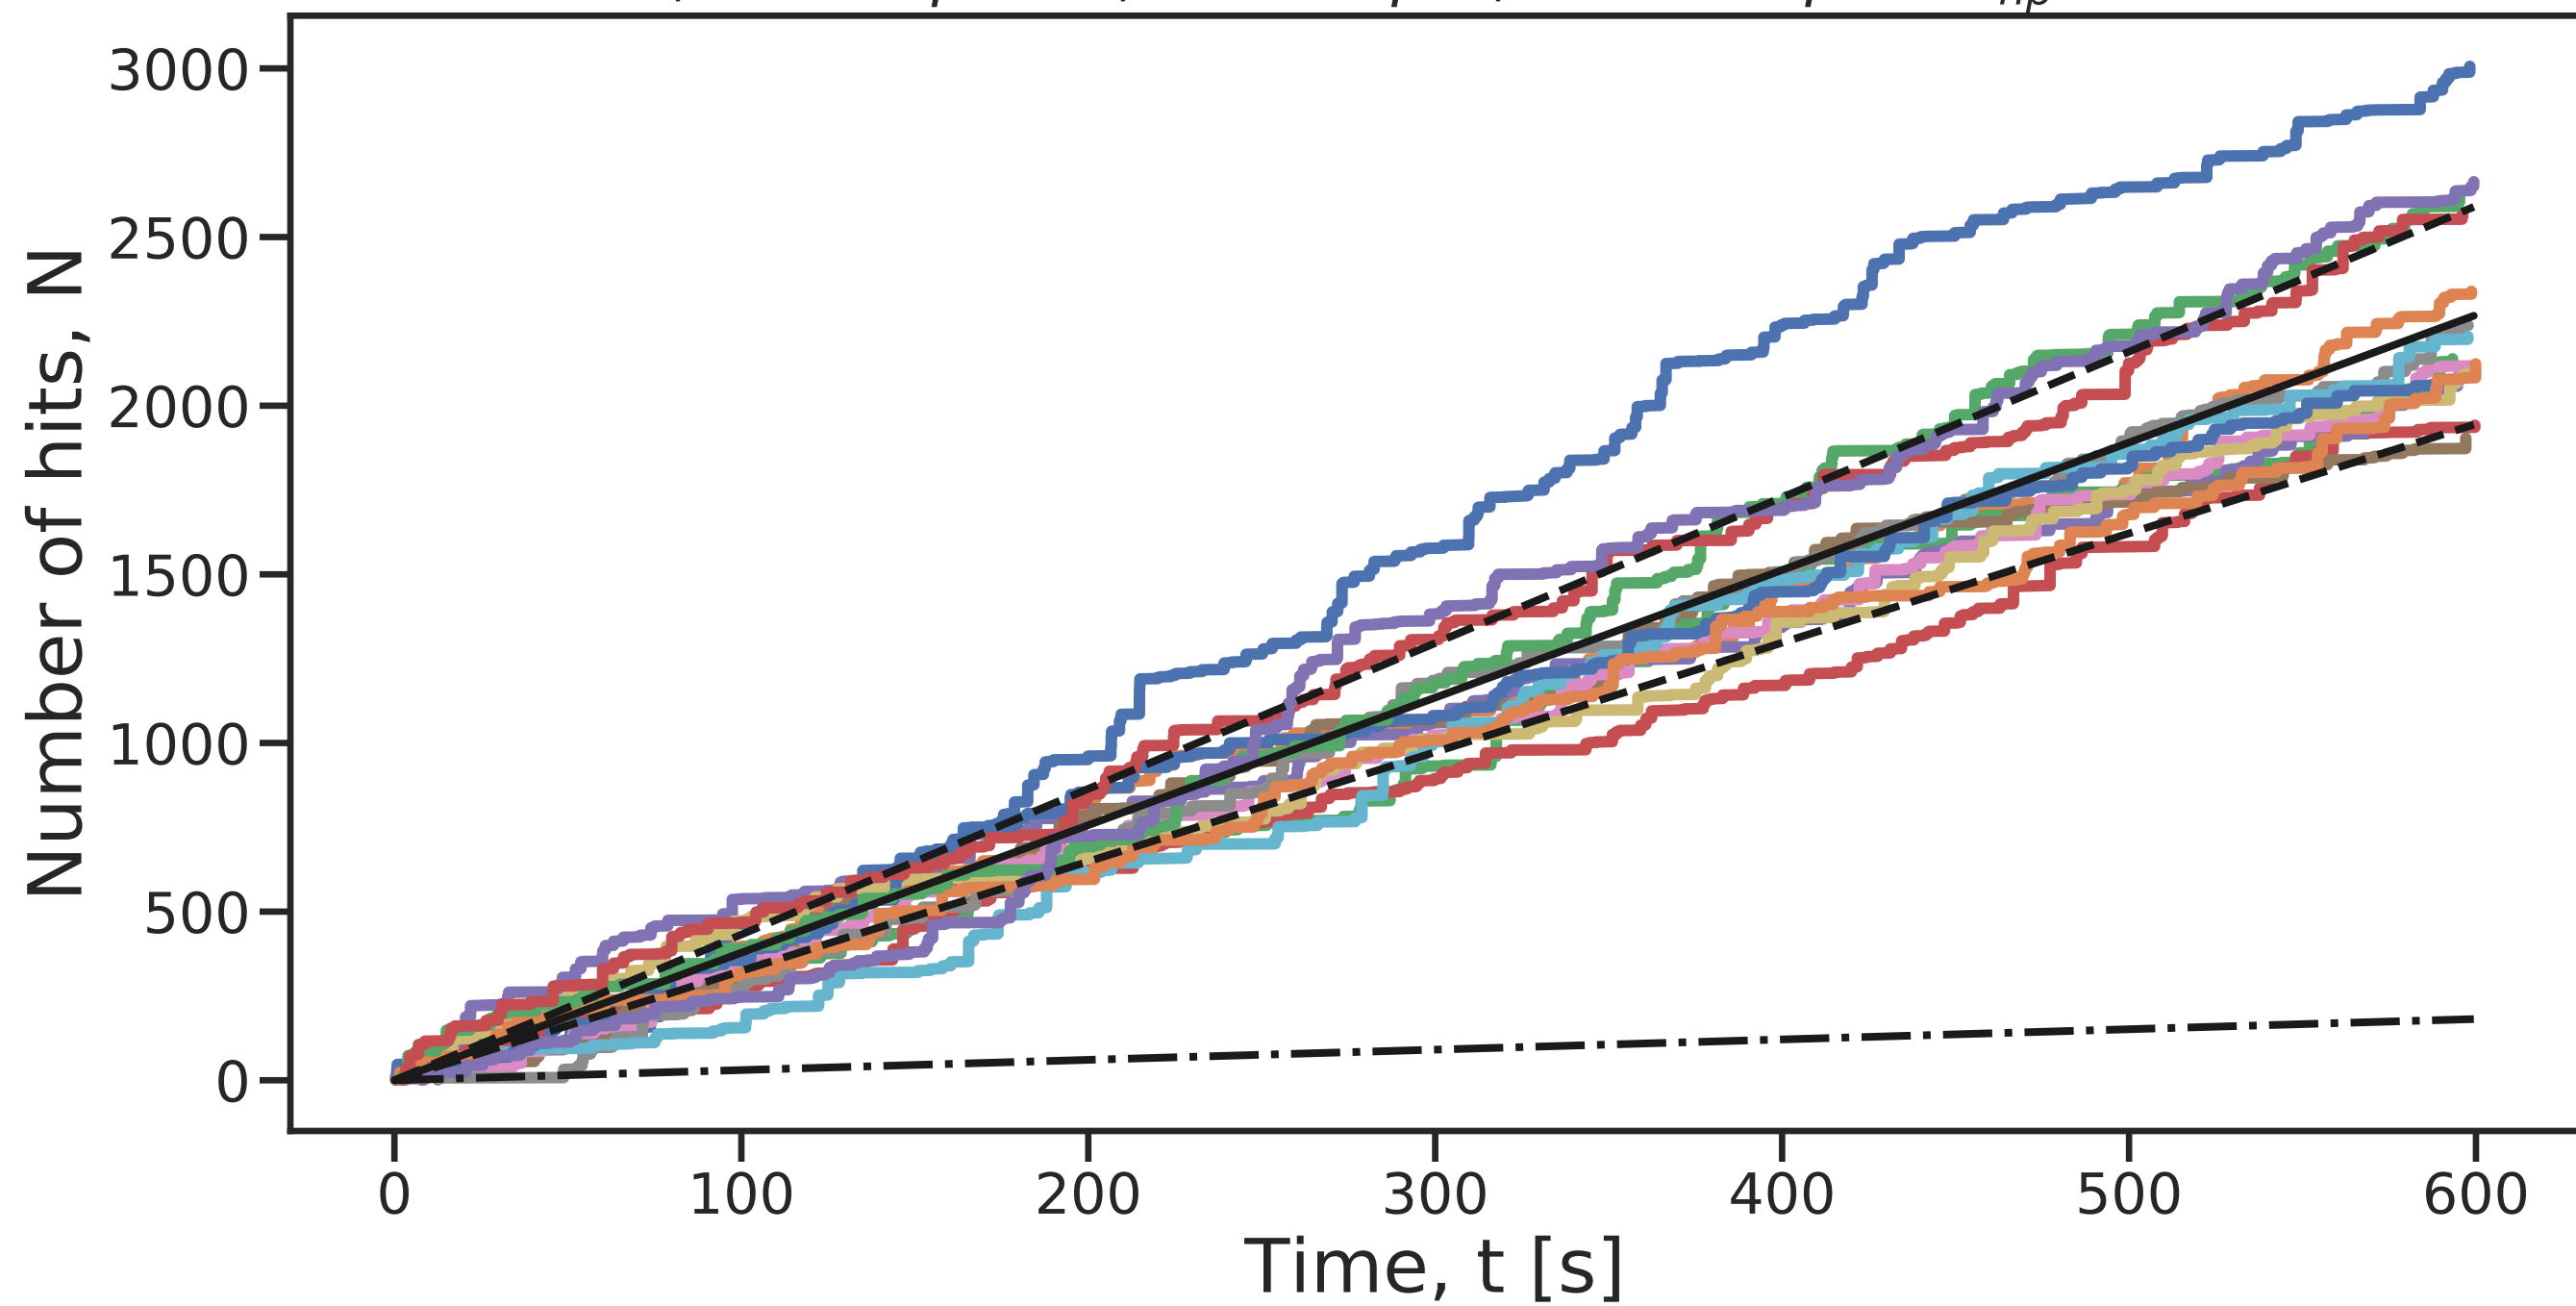

$c = 0.02 \text{ nM}; D = 80 \mu\text{m}^2/\text{s}; R = 0.1 \mu\text{m}; \Delta t = 1.0 \mu\text{s} \langle N_{np} \rangle = 698.8 \pm 69.5$

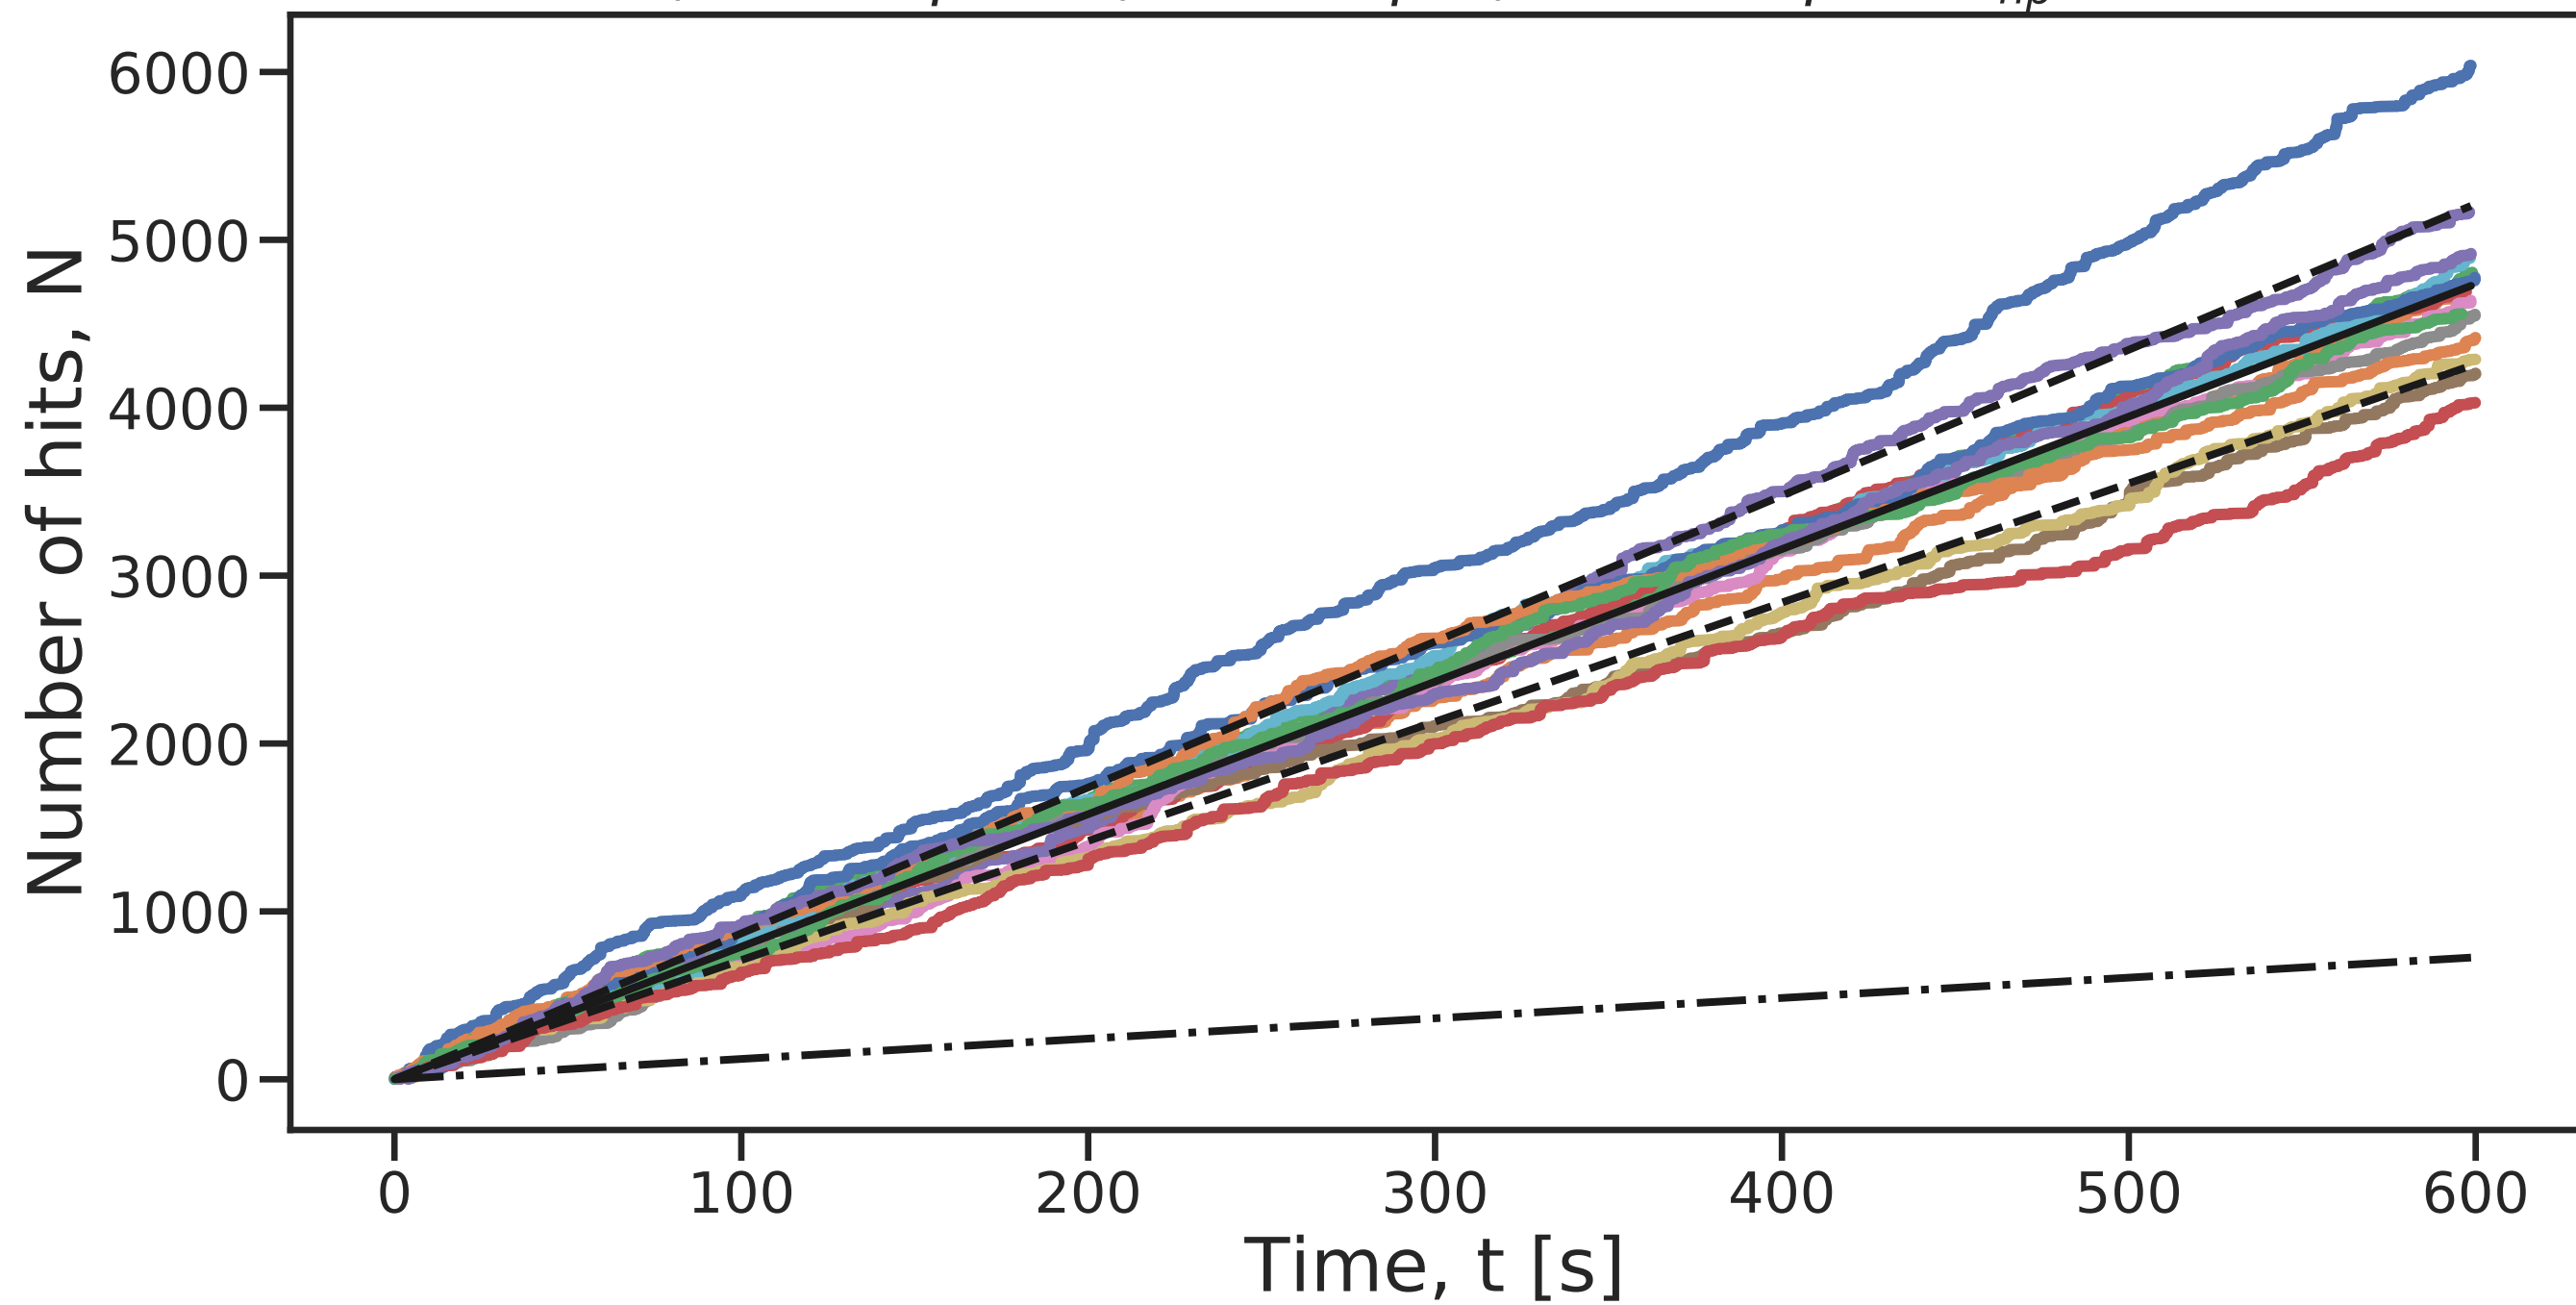

$c = 0.03 \text{ nM}; D = 160 \text{ } \mu\text{m}^2/\text{s}; R = 0.1 \text{ } \mu\text{m}; \Delta t = 1.0 \text{ } \mu\text{s} \langle N_{np} \rangle = 2052.0 \pm 129.6$

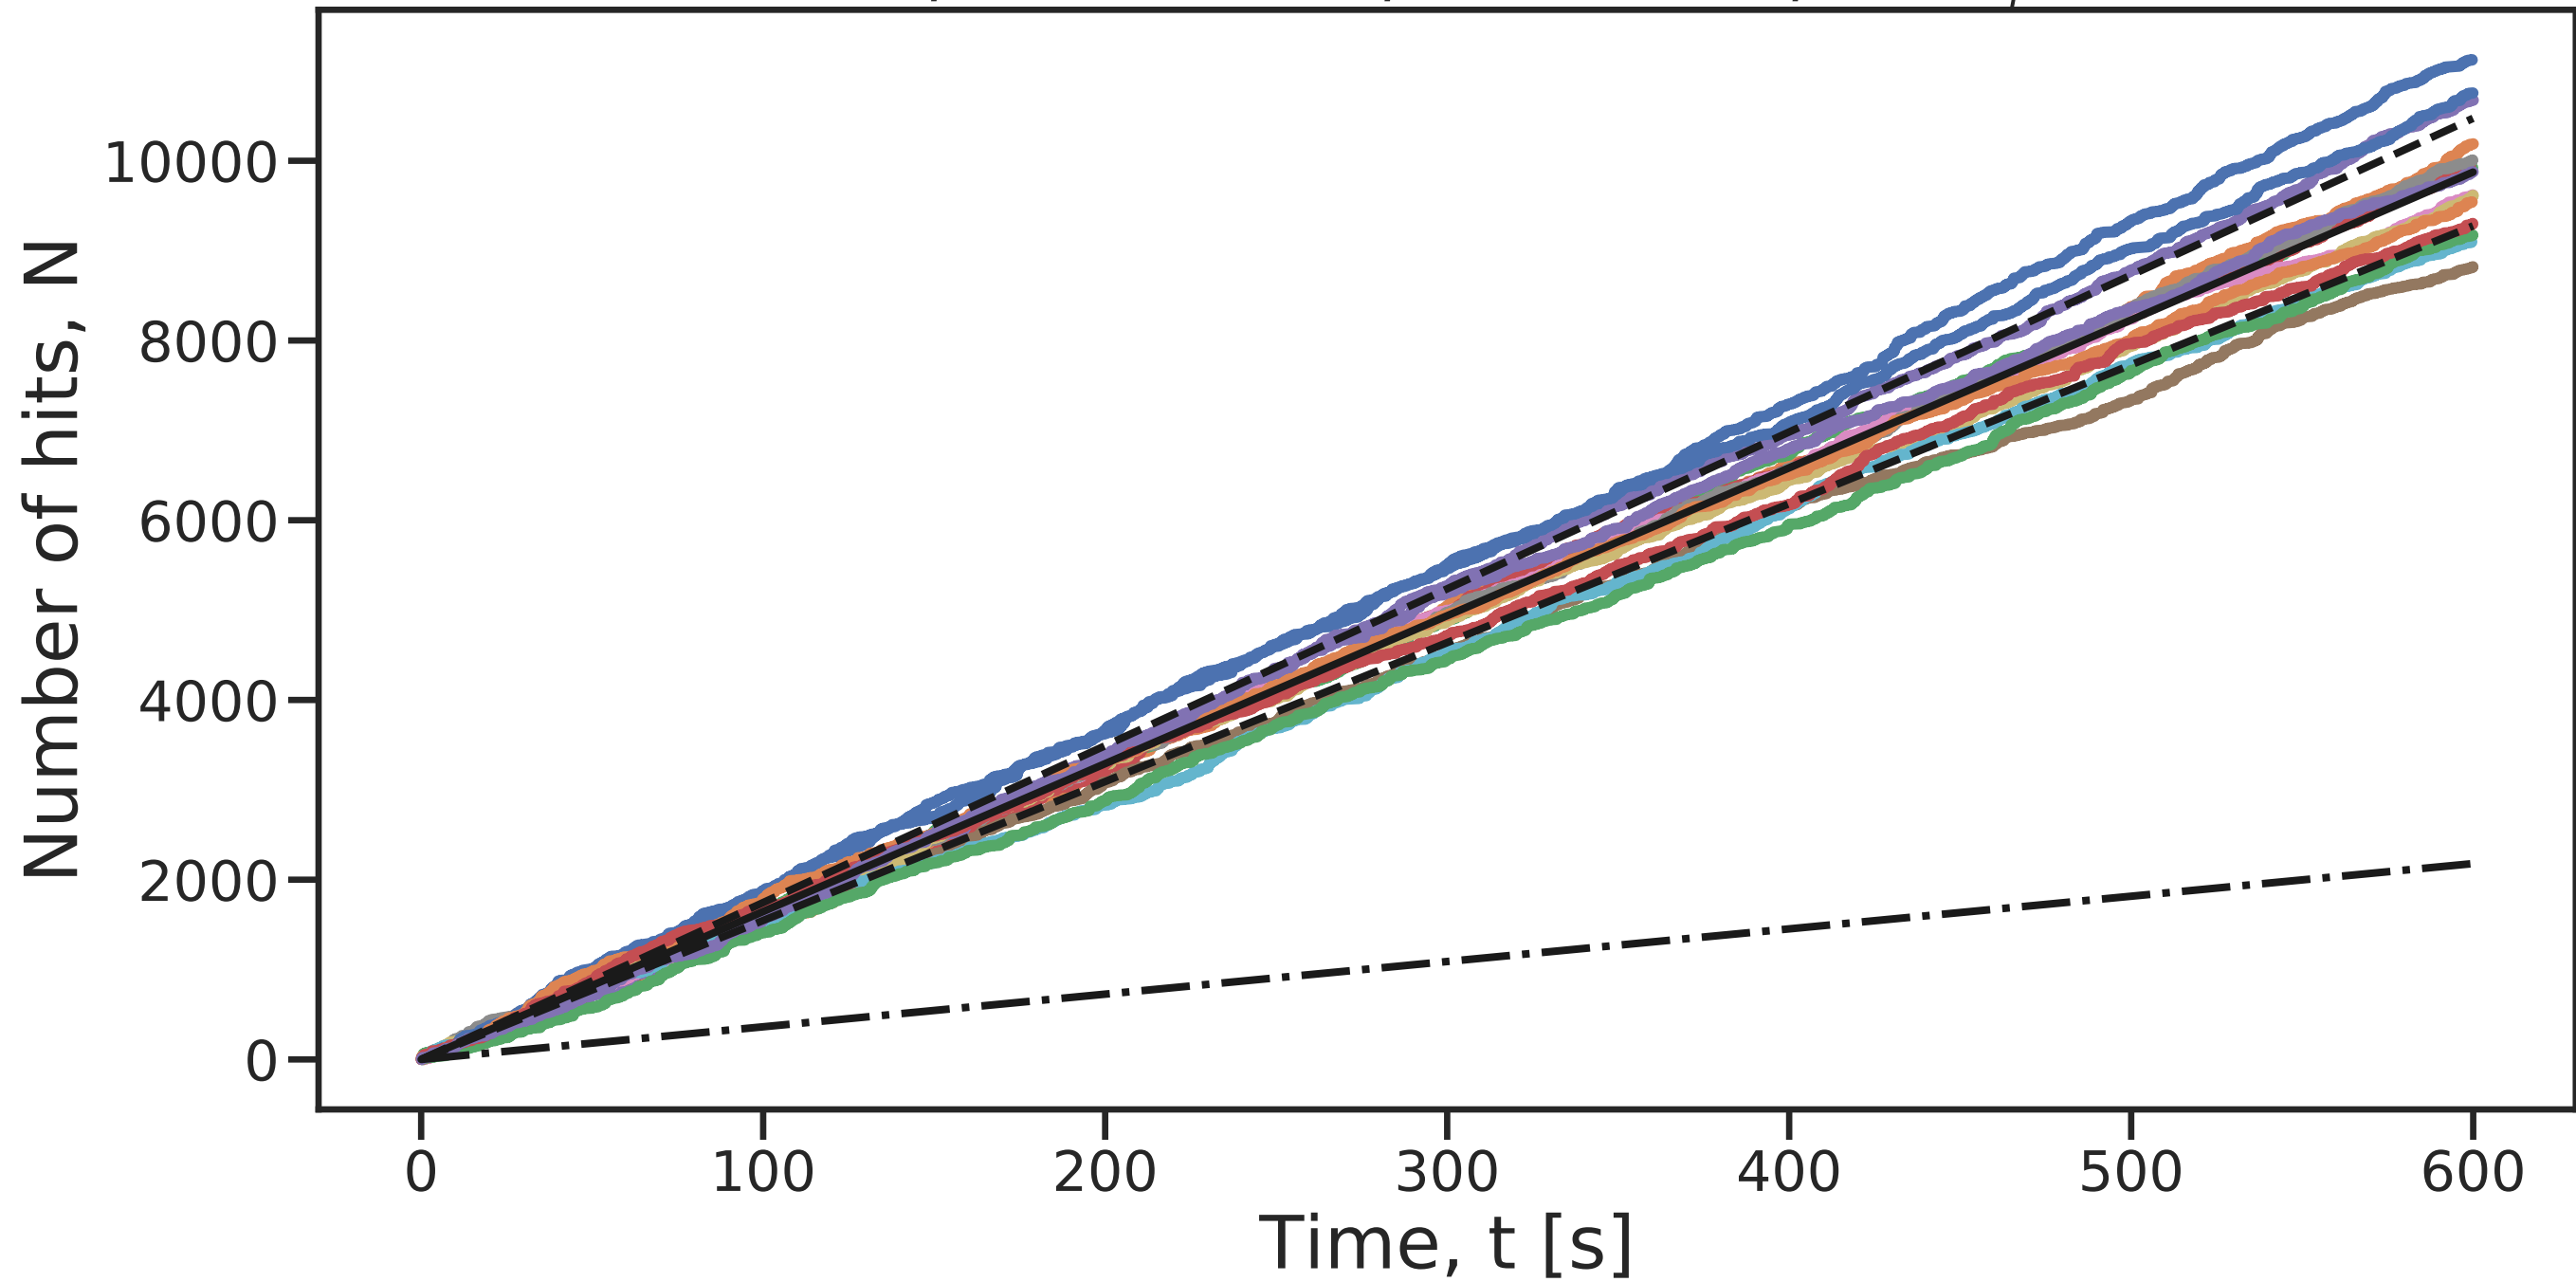

$c = 0.03 \text{ nM}; D = 20 \mu\text{m}^2/\text{s}; R = 0.1 \mu\text{m}; \Delta t = 1.0 \mu\text{s} \langle N_{np} \rangle = 270.9 \pm 21.8$

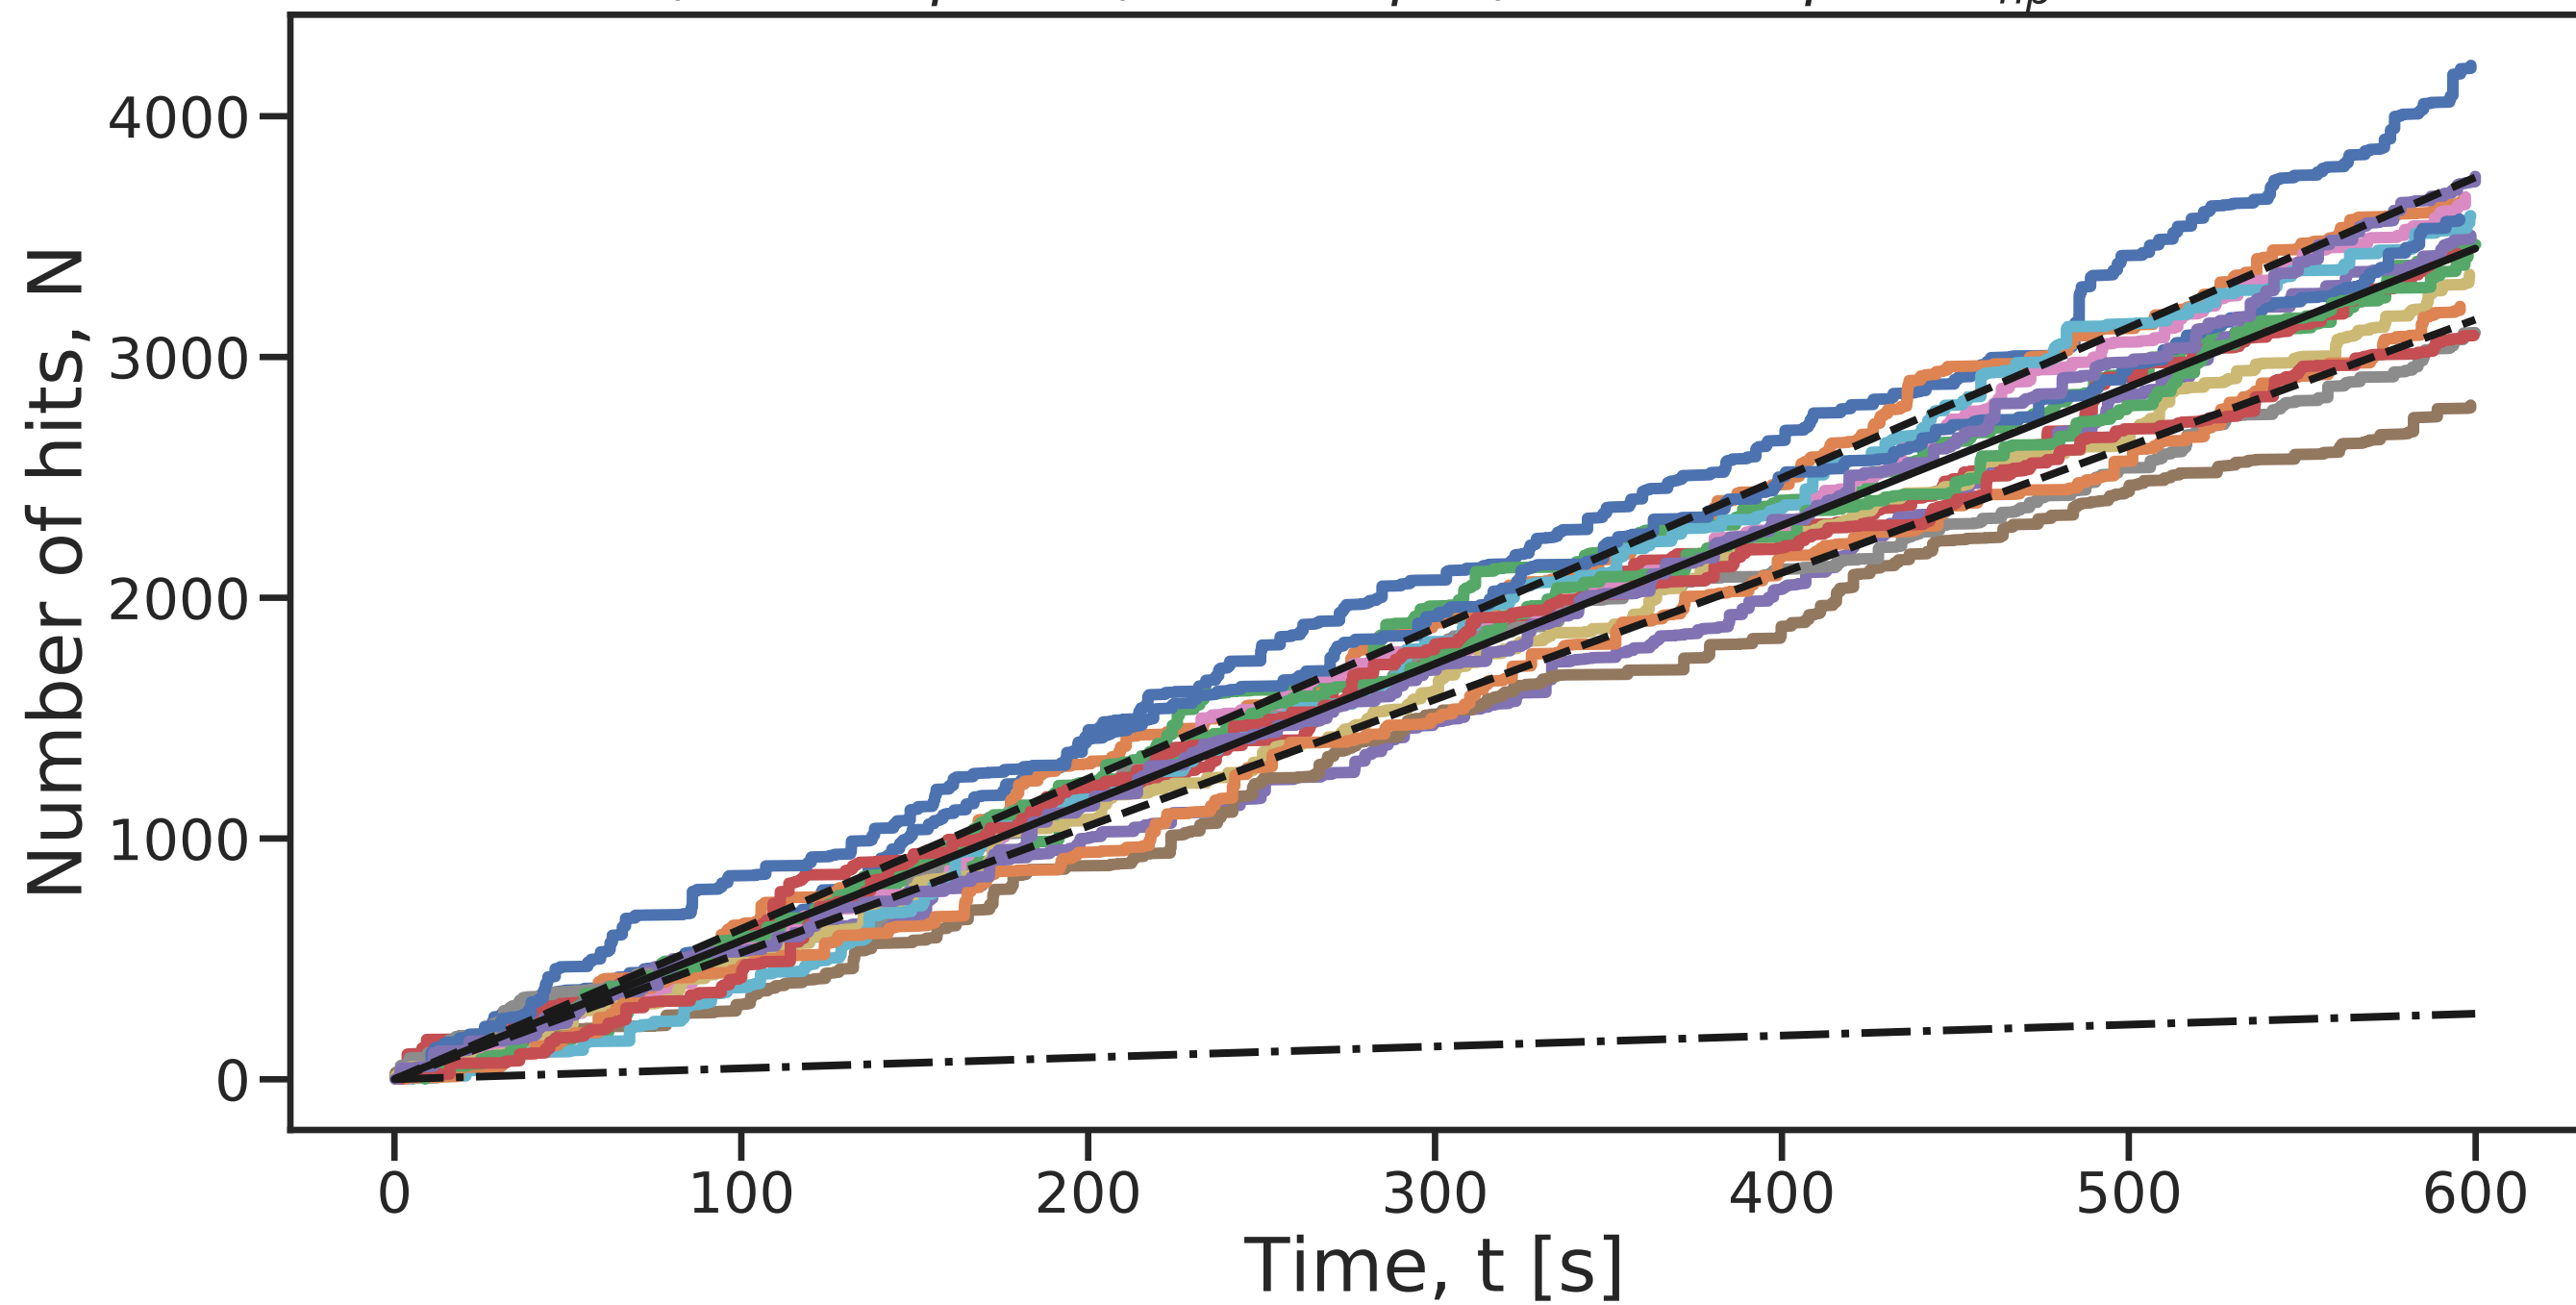

$c = 0.03 \text{ nM}; D = 80 \mu\text{m}^2/\text{s}; R = 0.1 \mu\text{m}; \Delta t = 1.0 \mu\text{s} \langle N_{np} \rangle = 1053.9 \pm 73.3$

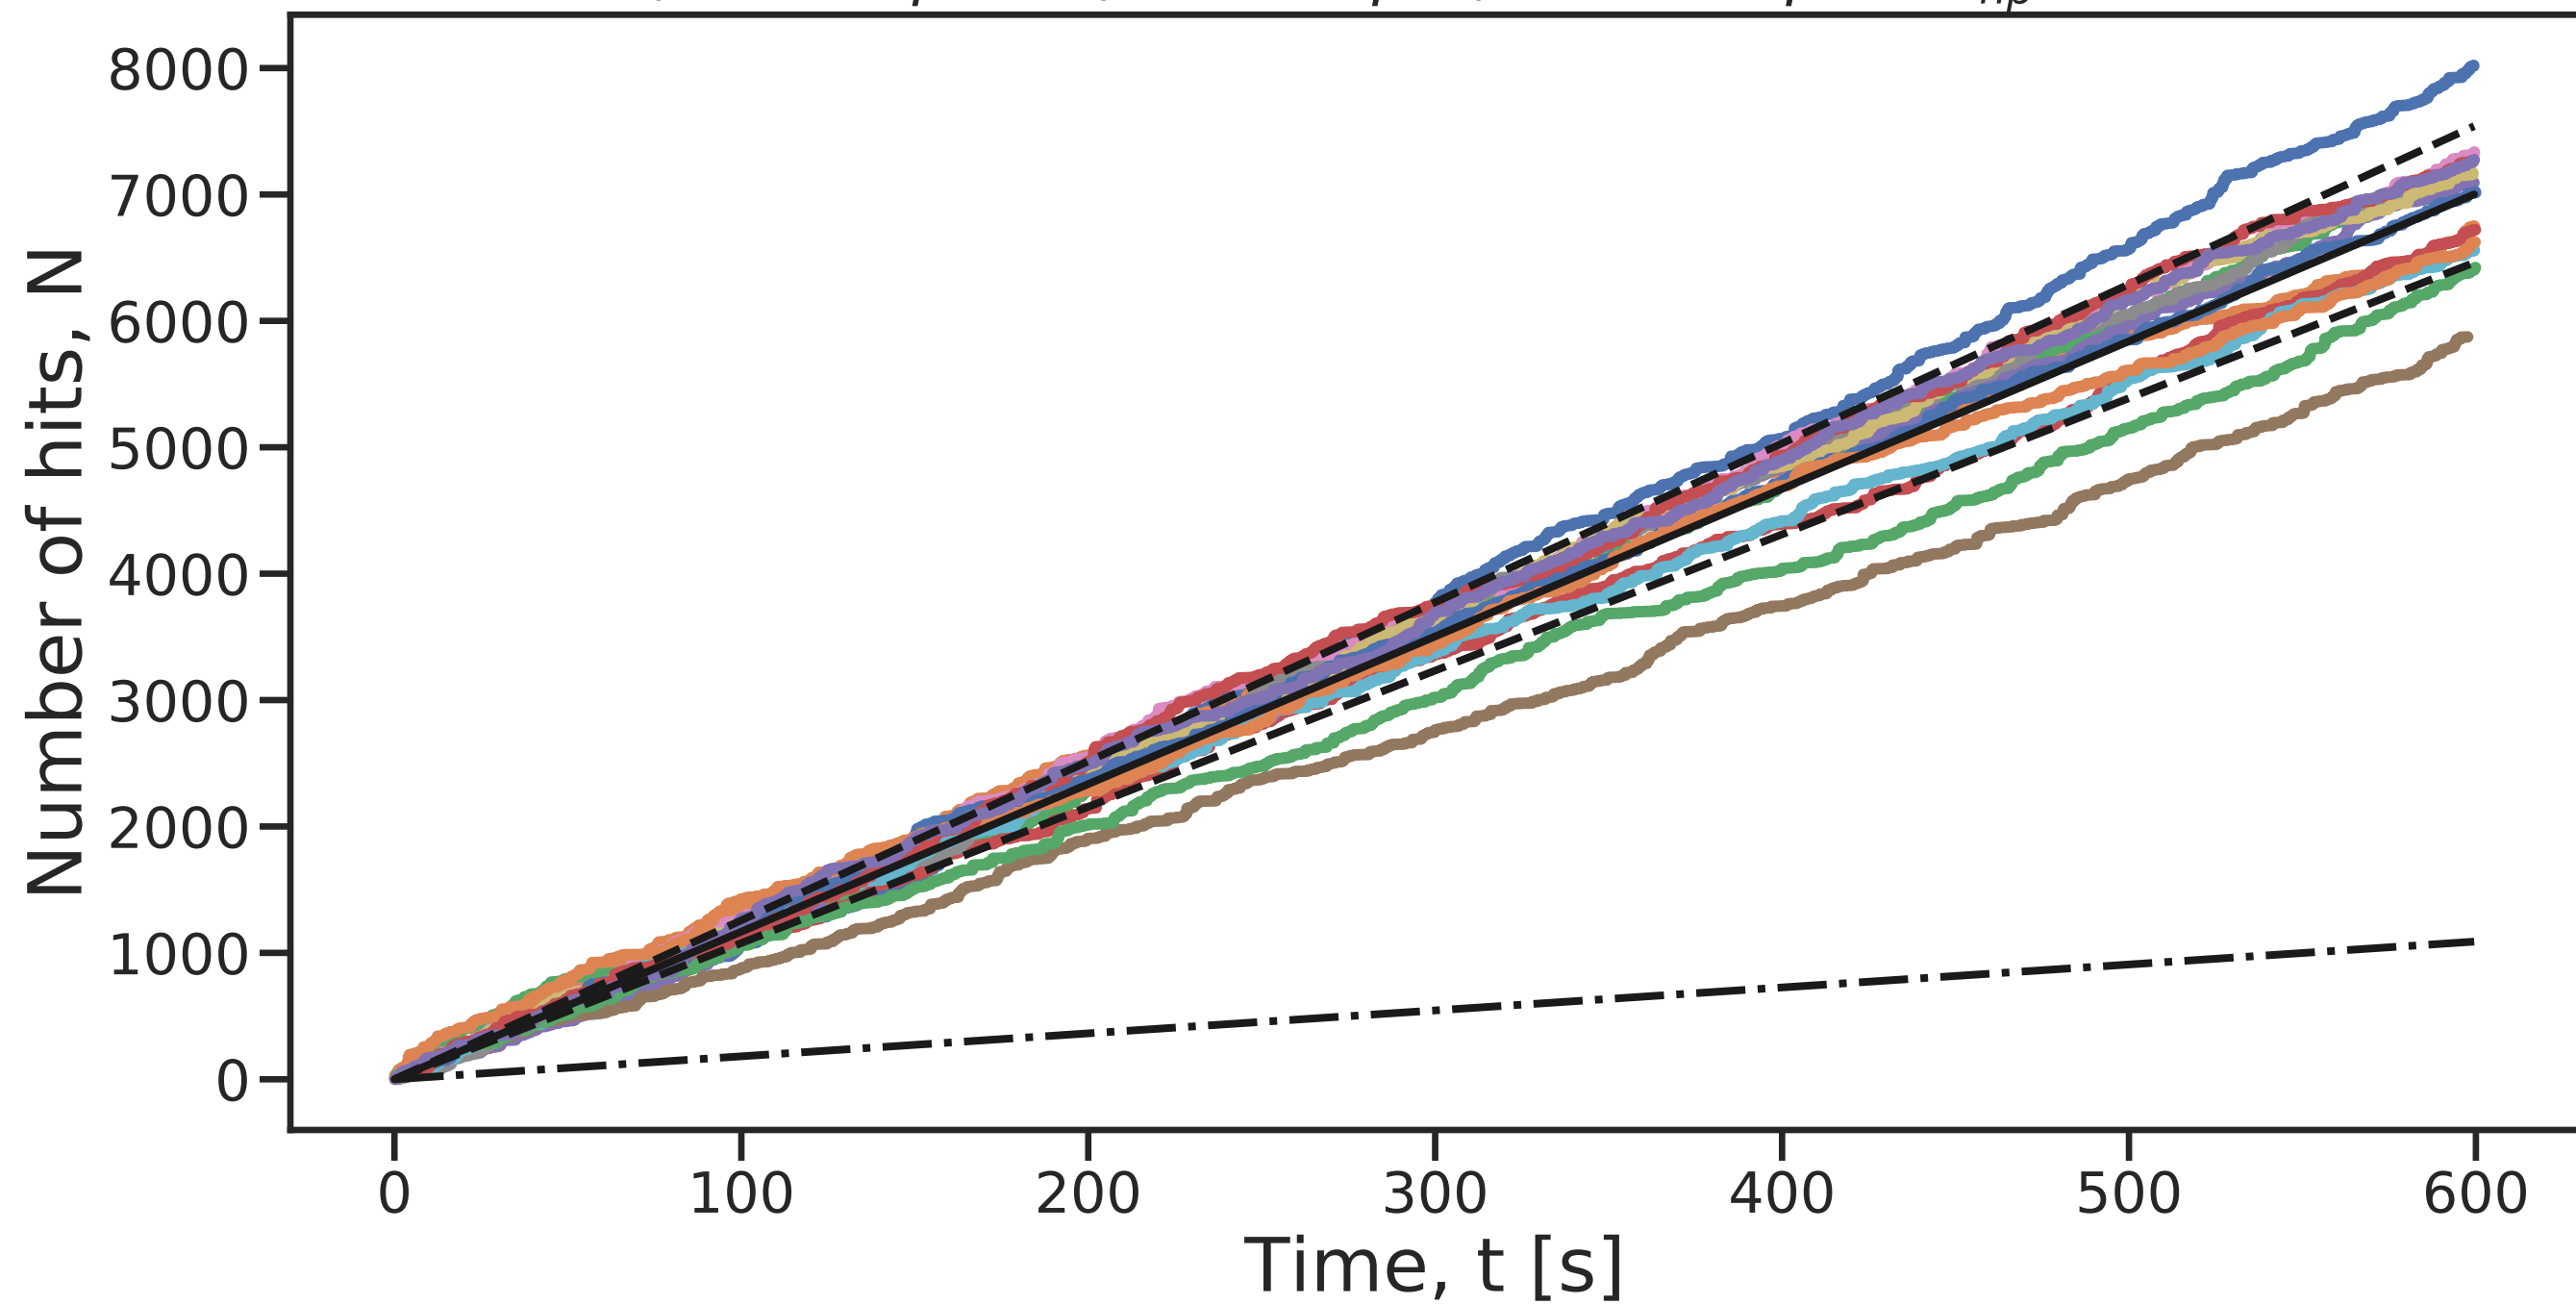

$c = 0.04 \text{ nM}; D = 160 \text{ } \mu\text{m}^2/\text{s}; R = 0.1 \text{ } \mu\text{m}; \Delta t = 1.0 \text{ } \mu\text{s} \langle N_{np} \rangle = 2671.9 \pm 153.9$

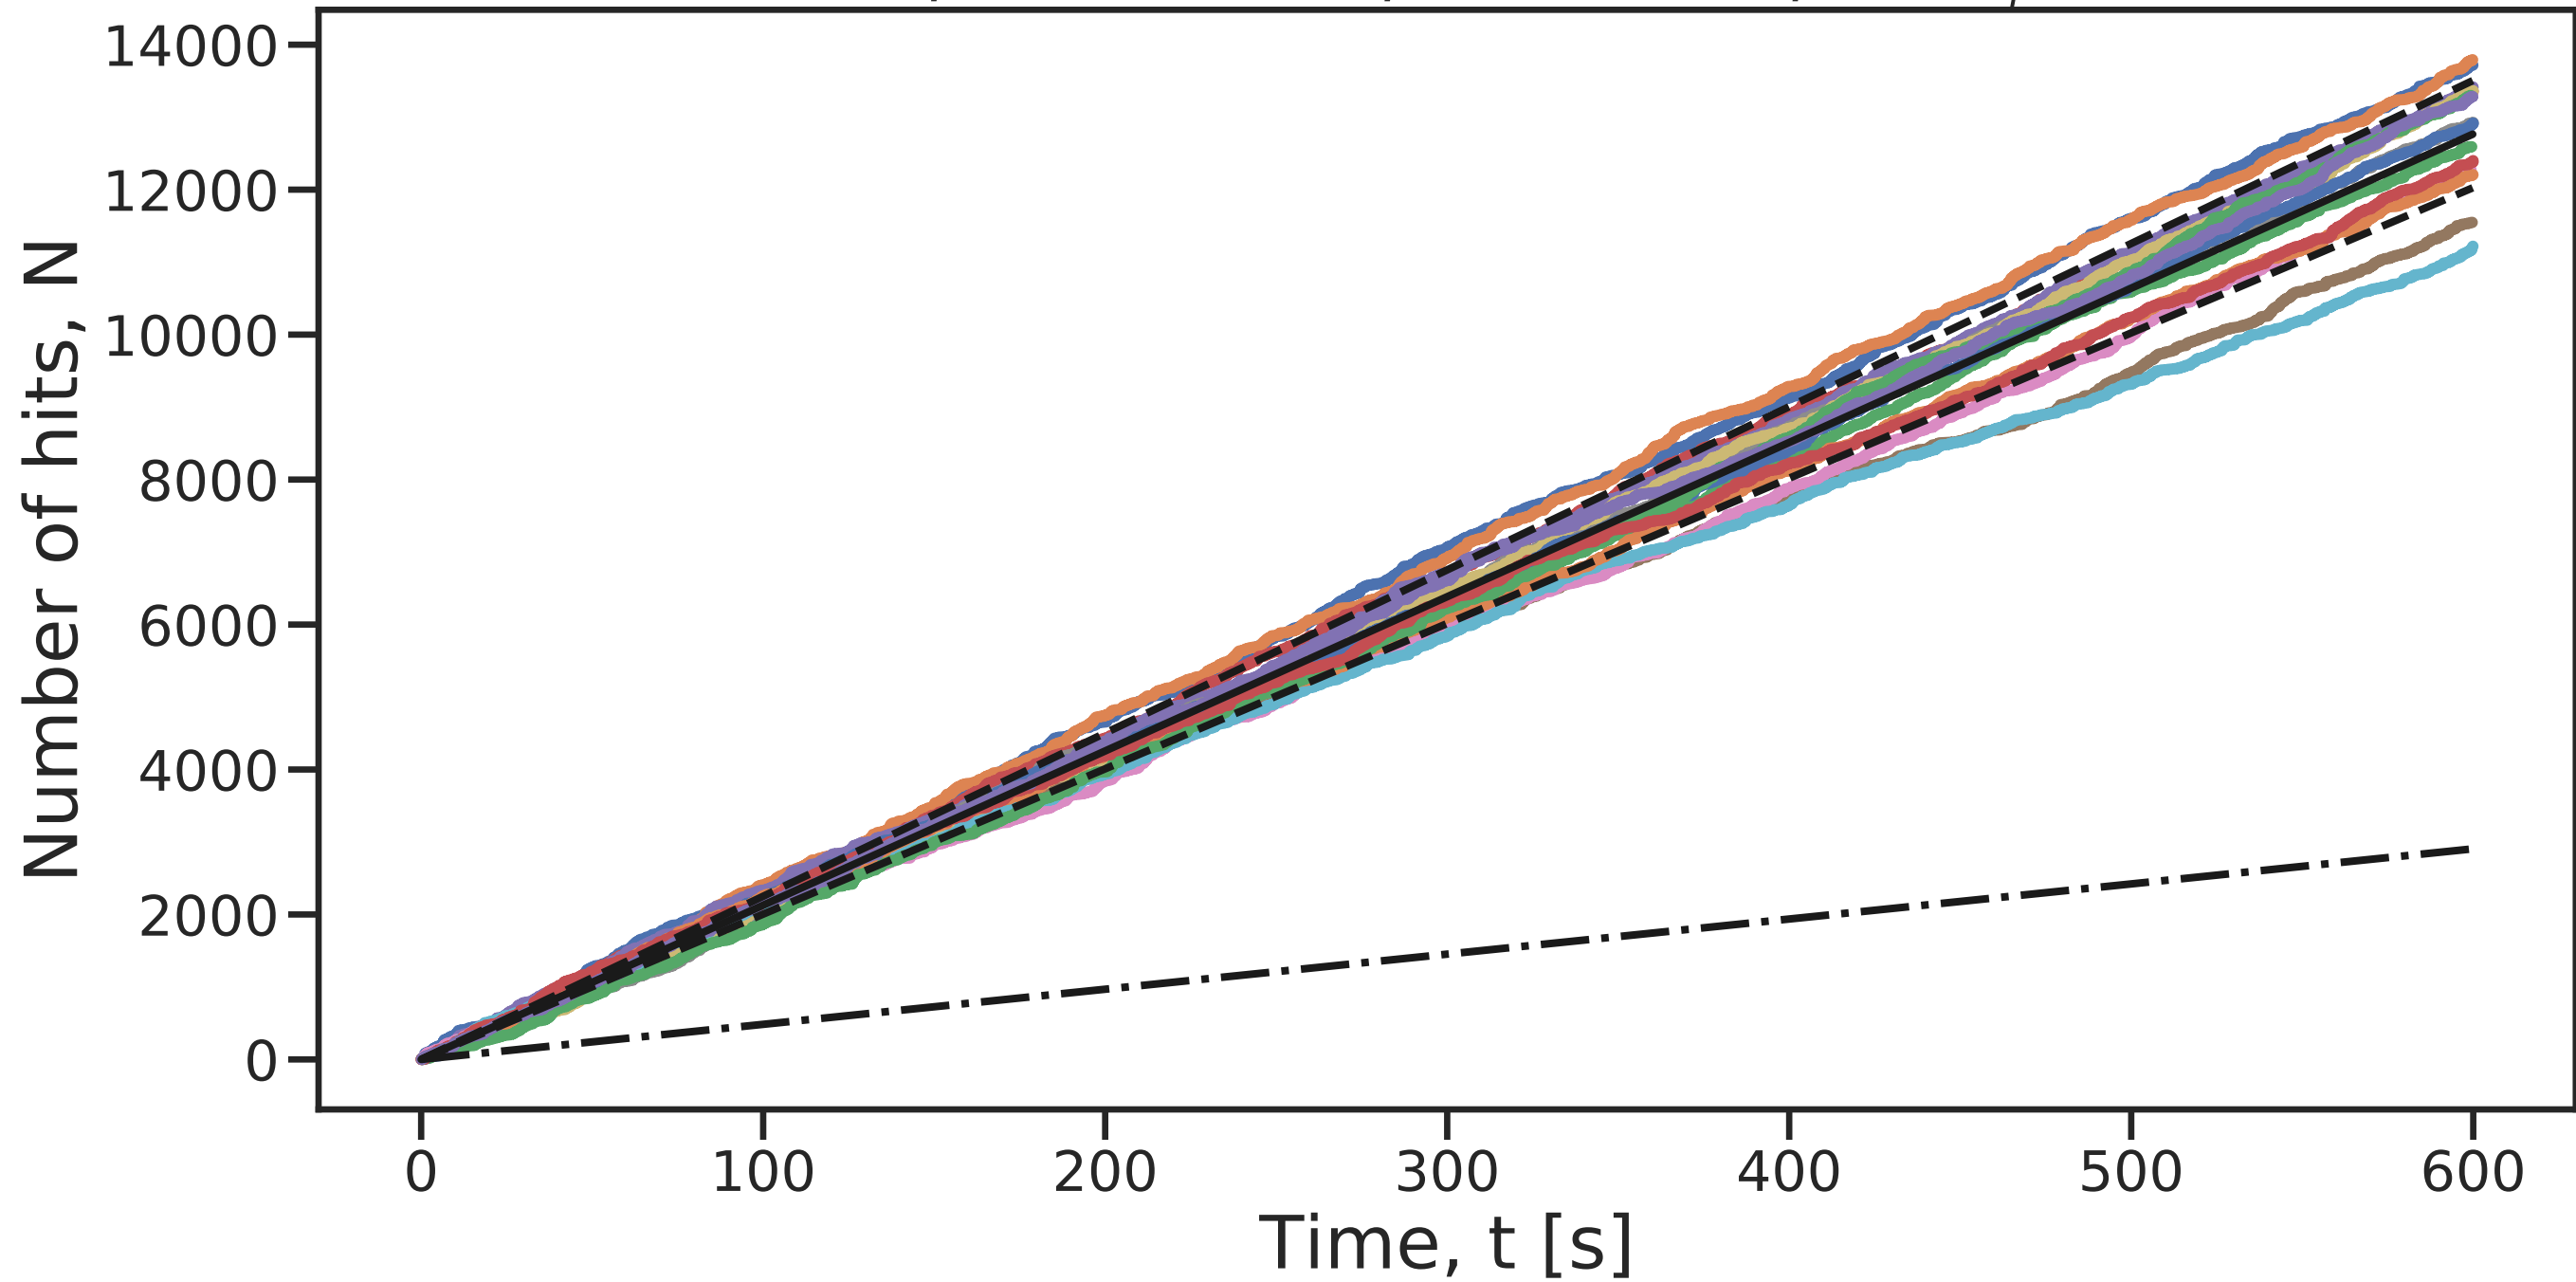

$c = 0.04 \text{ nM}; D = 20 \text{ } \mu\text{m}^2/\text{s}; R = 0.1 \text{ } \mu\text{m}; \Delta t = 1.0 \text{ } \mu\text{s} \langle N_{np} \rangle = 356.5 \pm 24.6$

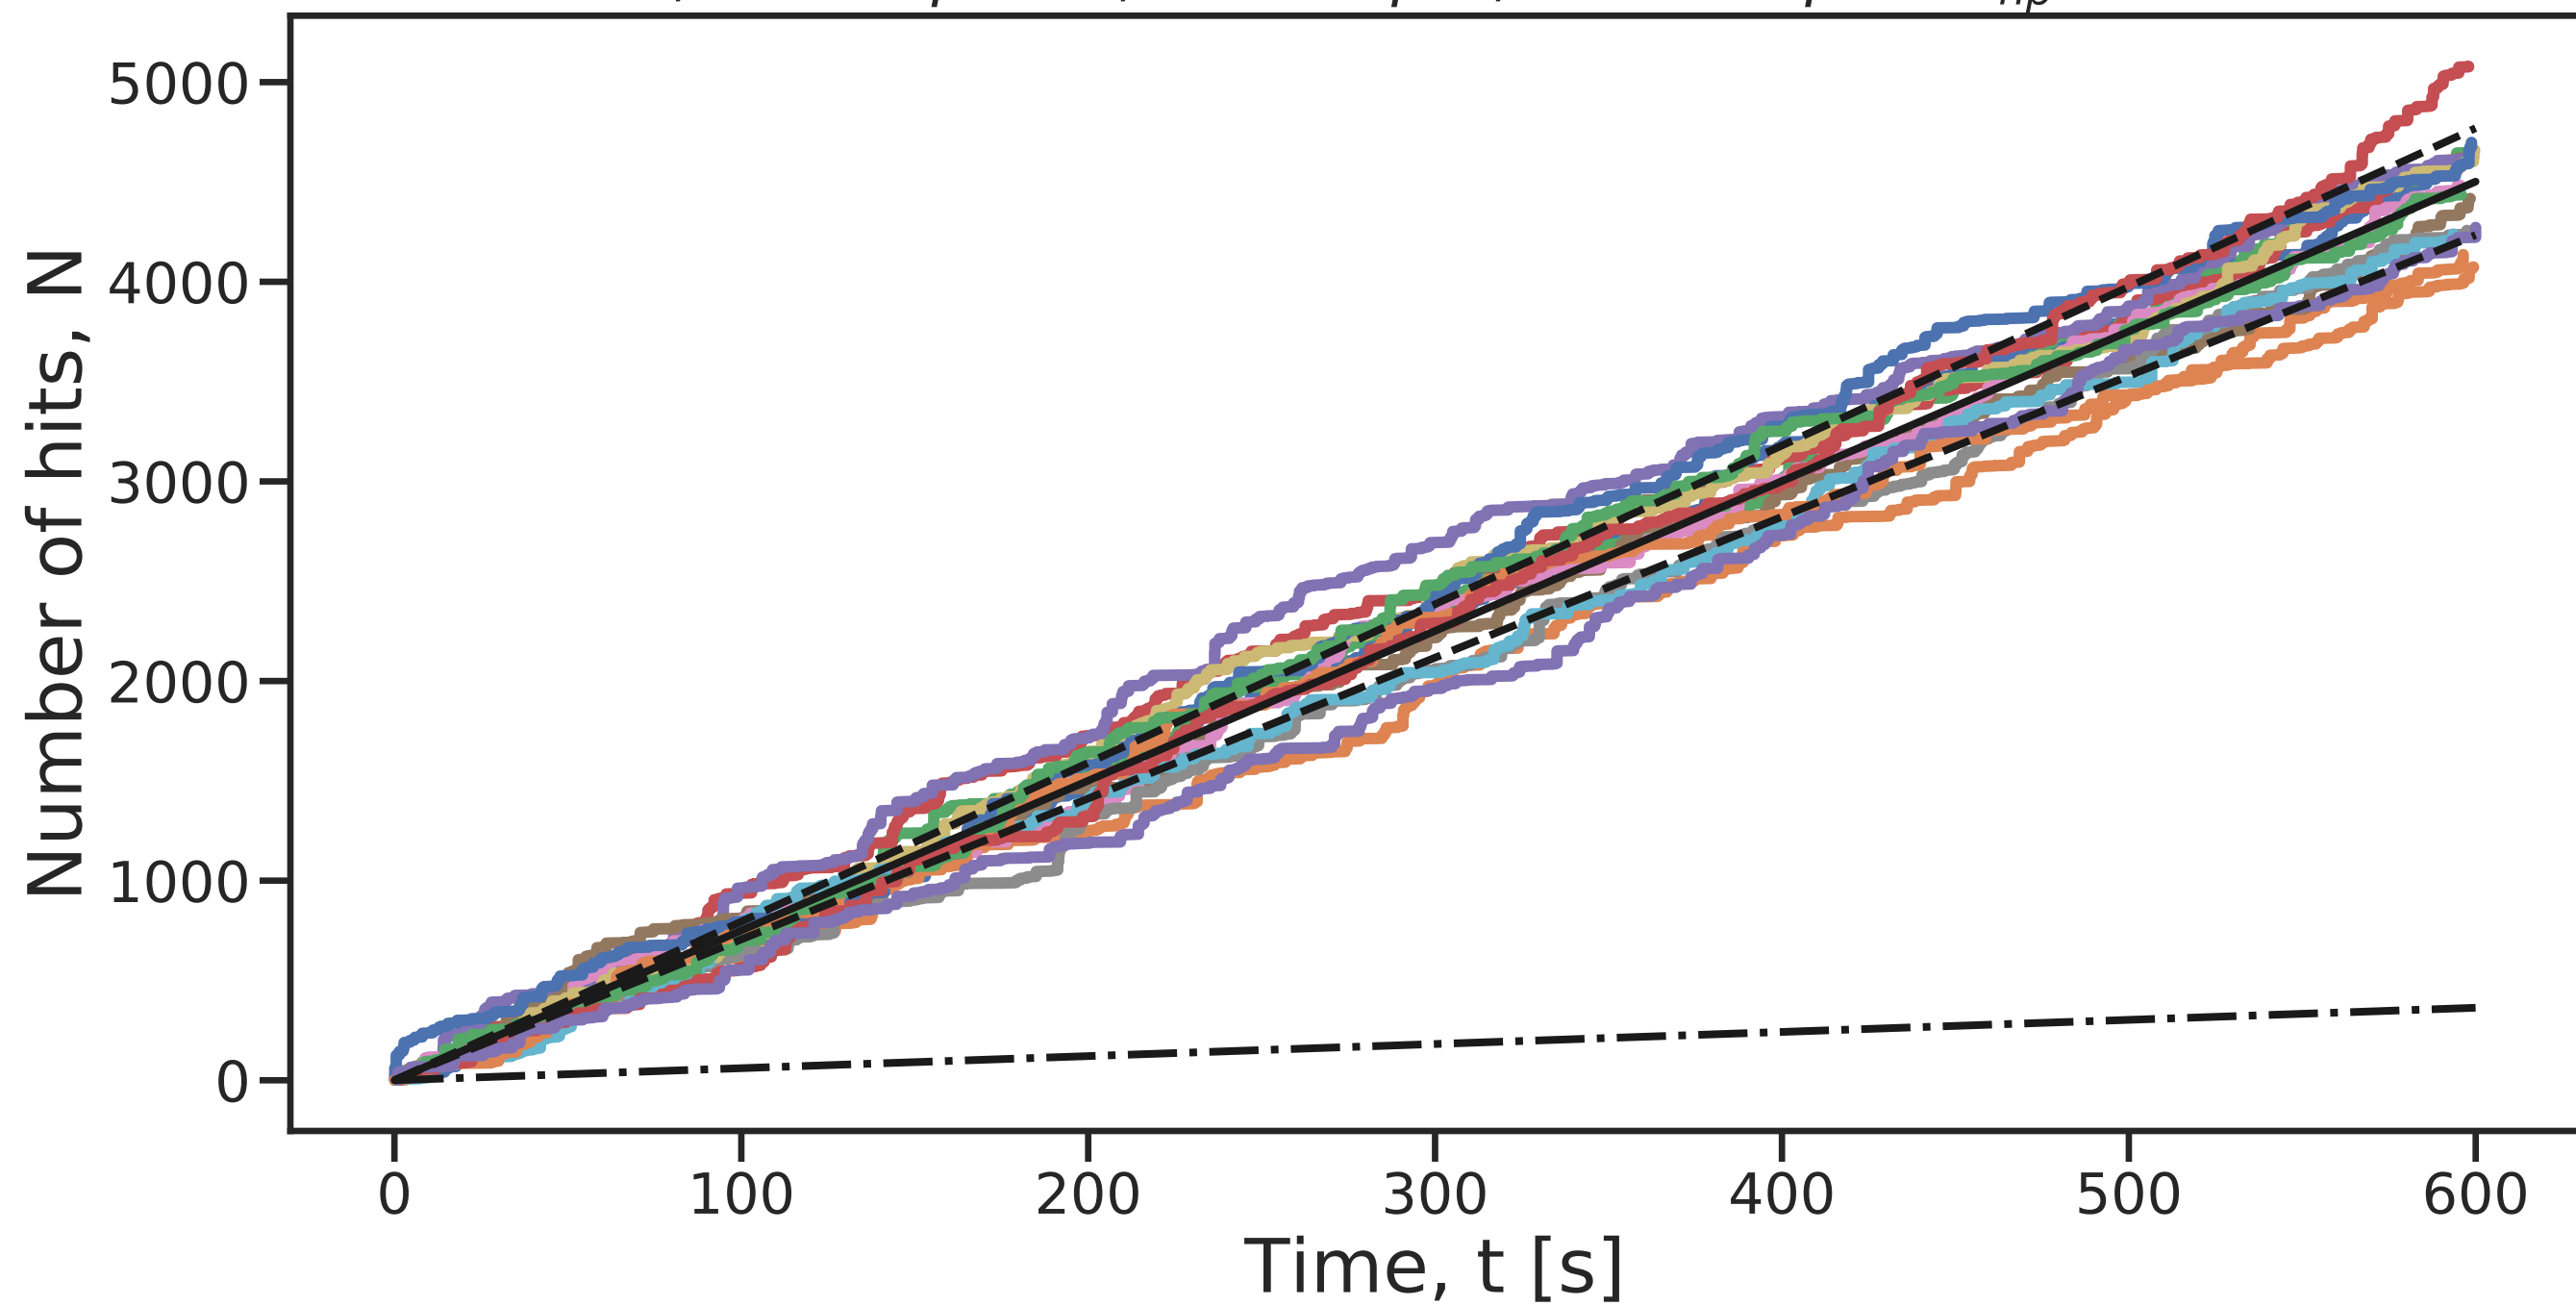

$$c = 0.04 \text{ nM}; D = 80 \text{ } \mu\text{m}^2/\text{s}; R = 0.1 \text{ } \mu\text{m}; \Delta t = 1.0 \text{ } \mu\text{s} \langle N_{np} \rangle = 1398.3 \pm 101.9$$
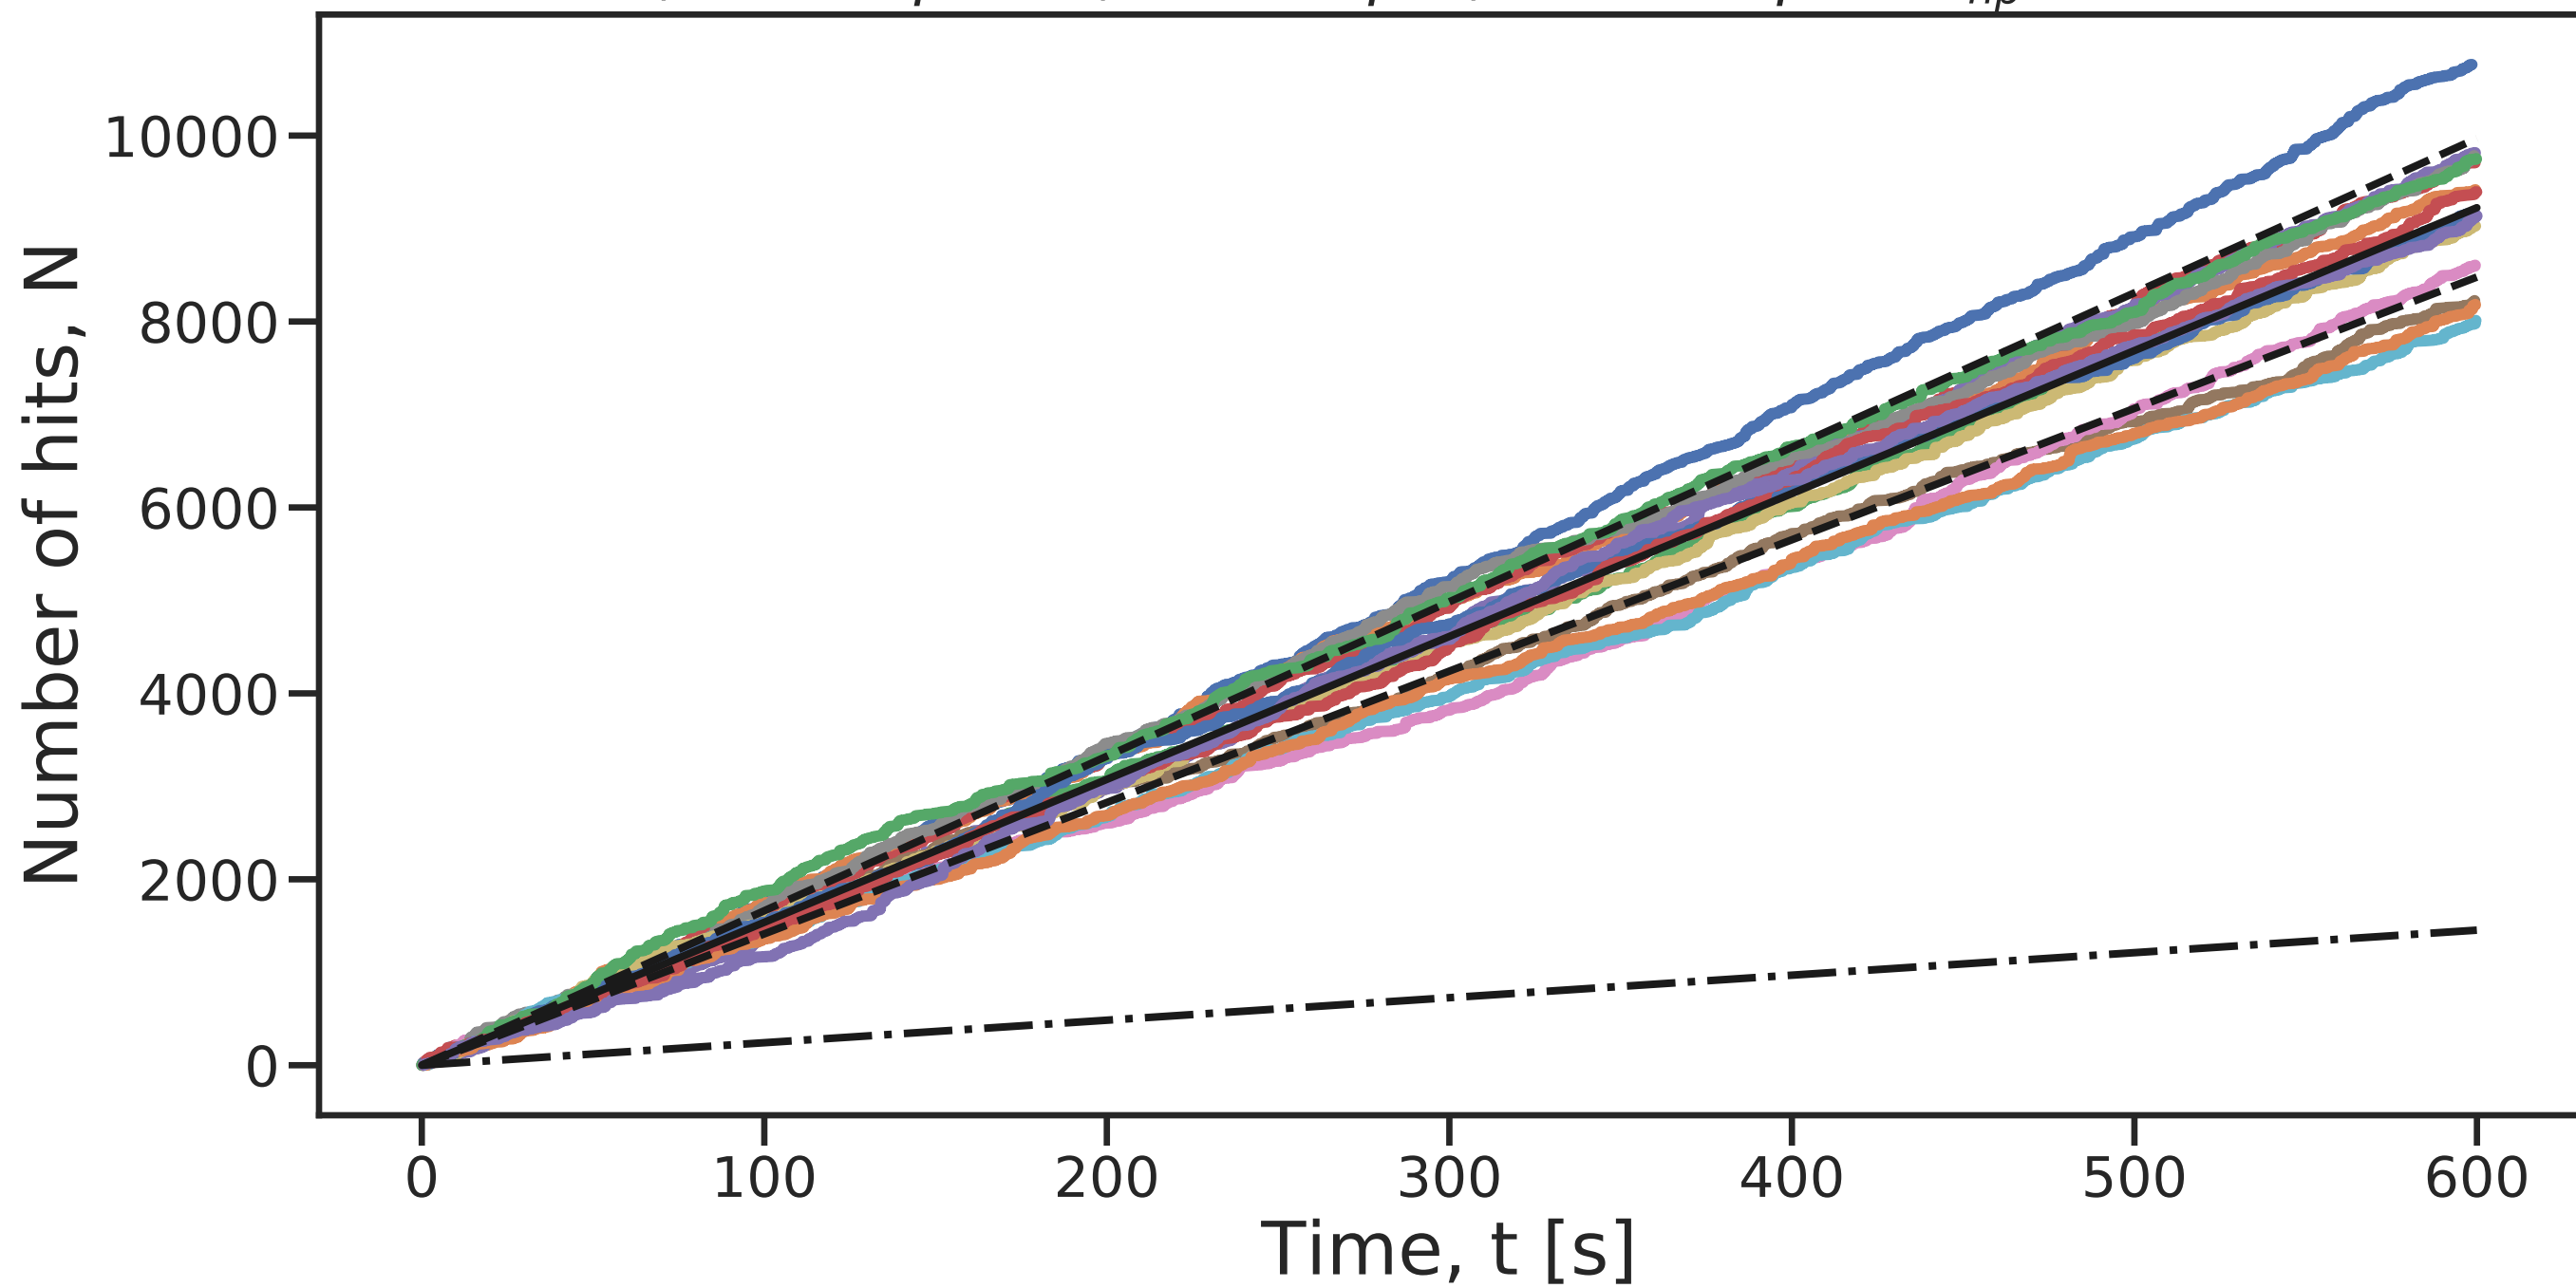



$c = 0.06 \text{ nM}; D = 160 \mu\text{m}^2/\text{s}; R = 0.1 \mu\text{m}; \Delta t = 1.0 \mu\text{s} \langle N_{np} \rangle = 4010.1 \pm 147.1$

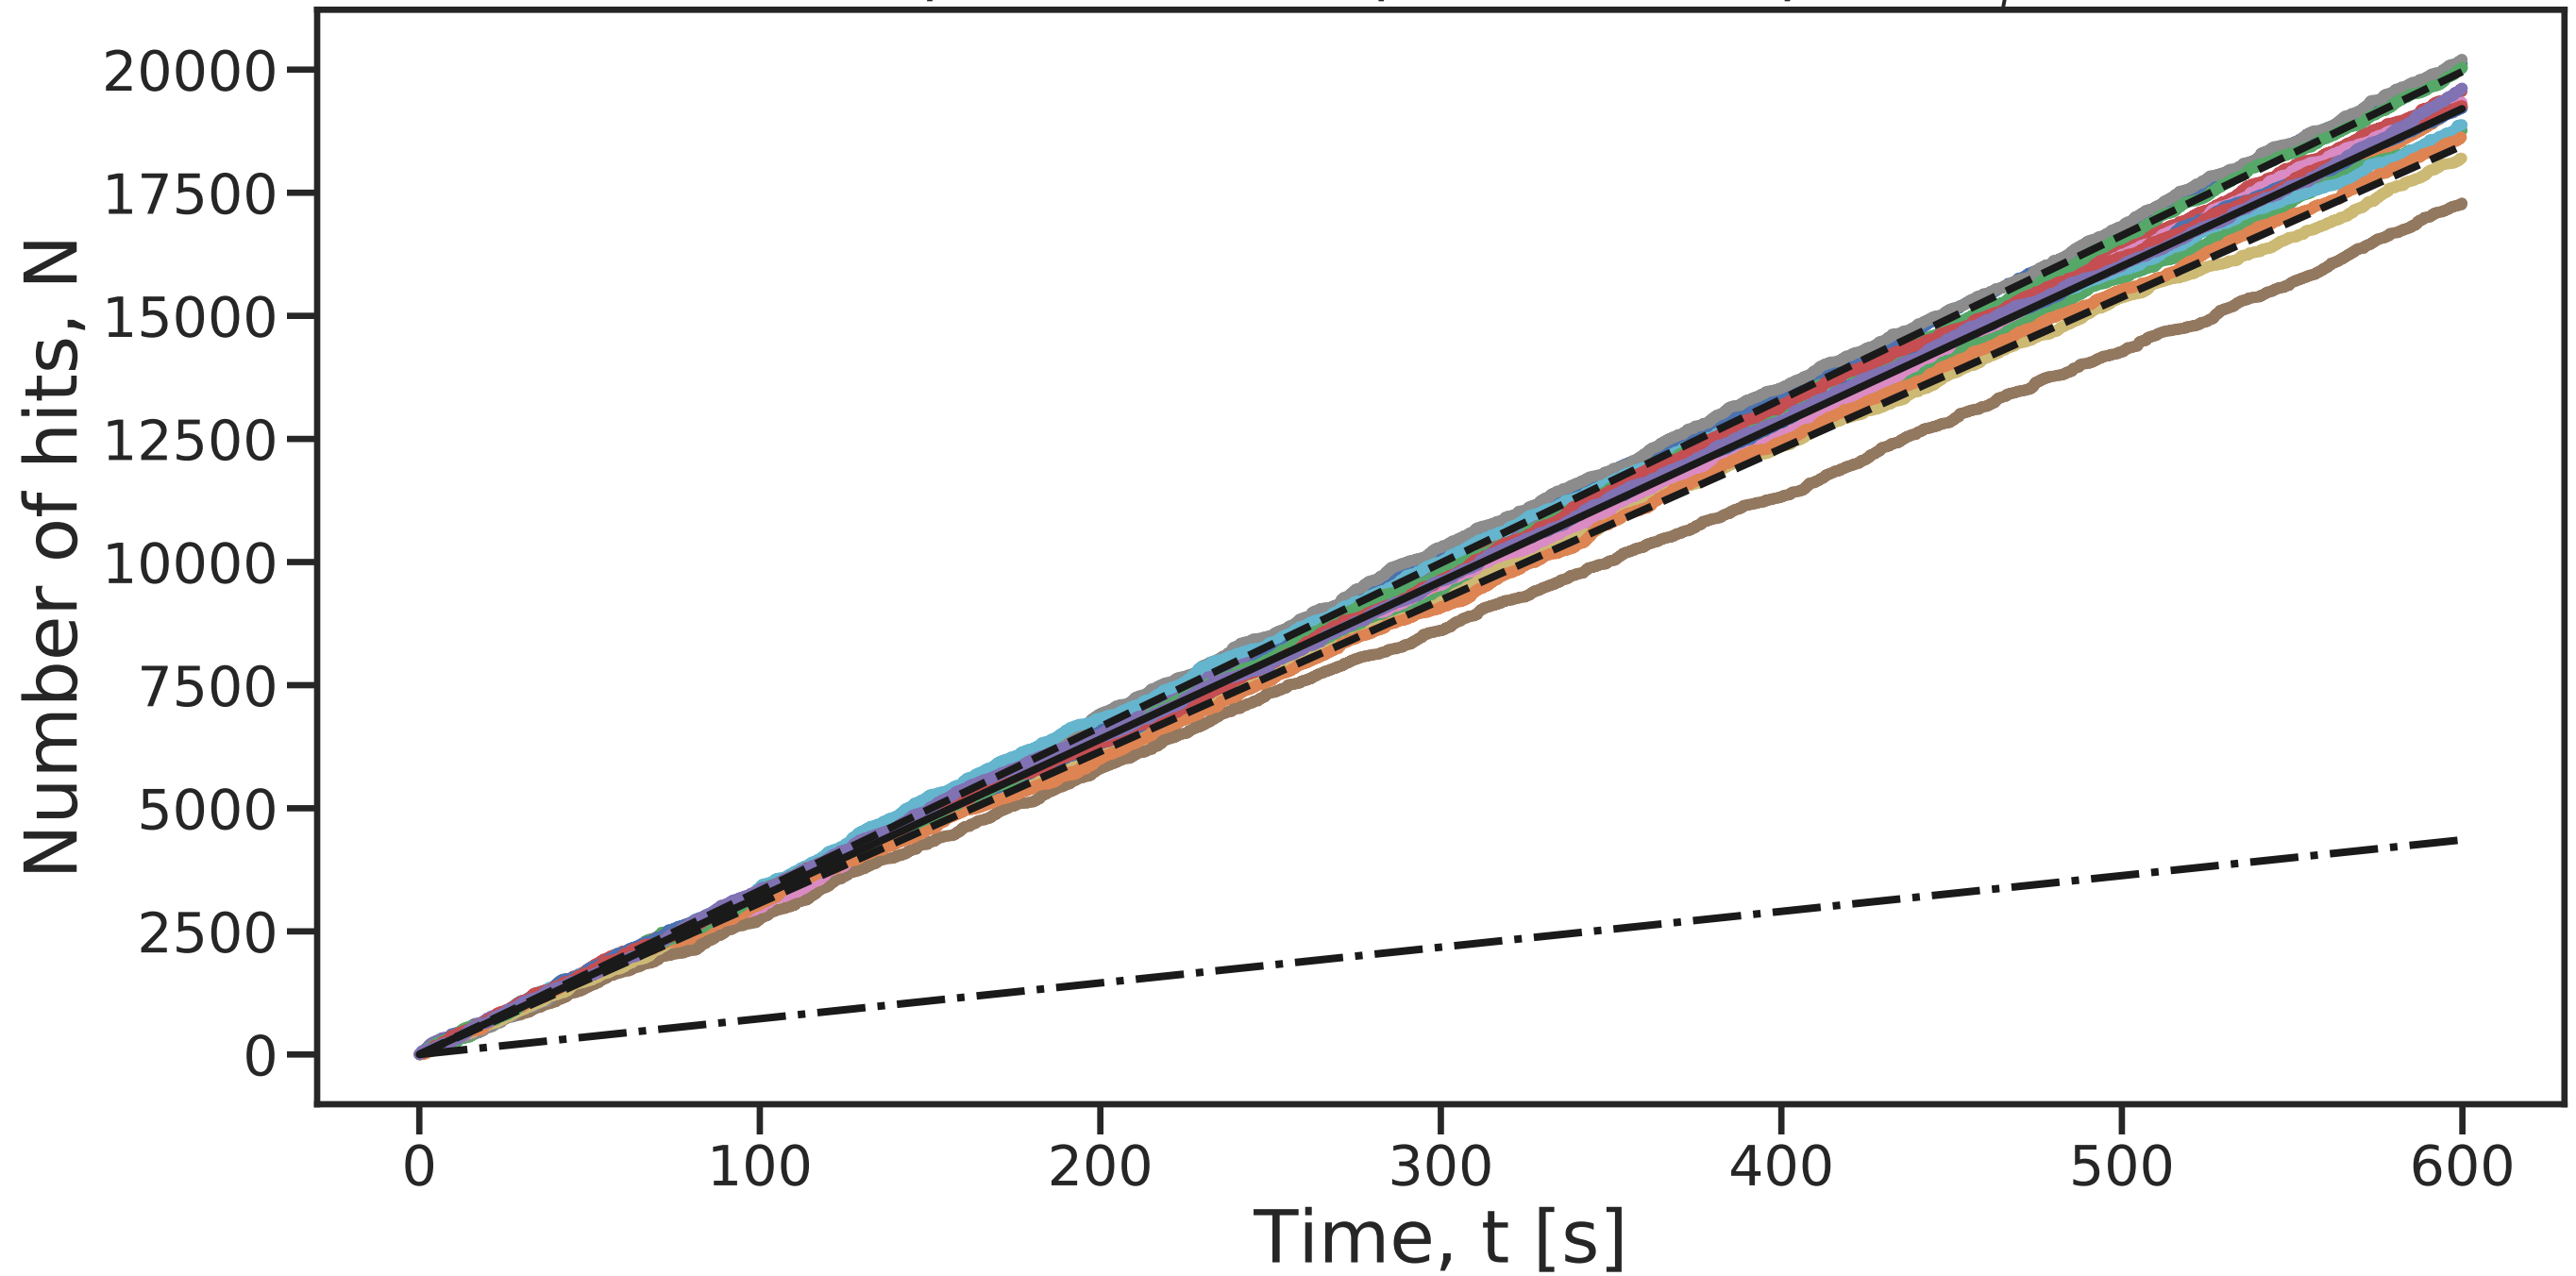

$c = 0.06 \text{ nM}; D = 20 \mu\text{m}^2/\text{s}; R = 0.1 \mu\text{m}; \Delta t = 1.0 \mu\text{s} \langle N_{np} \rangle = 543.3 \pm 34.0$

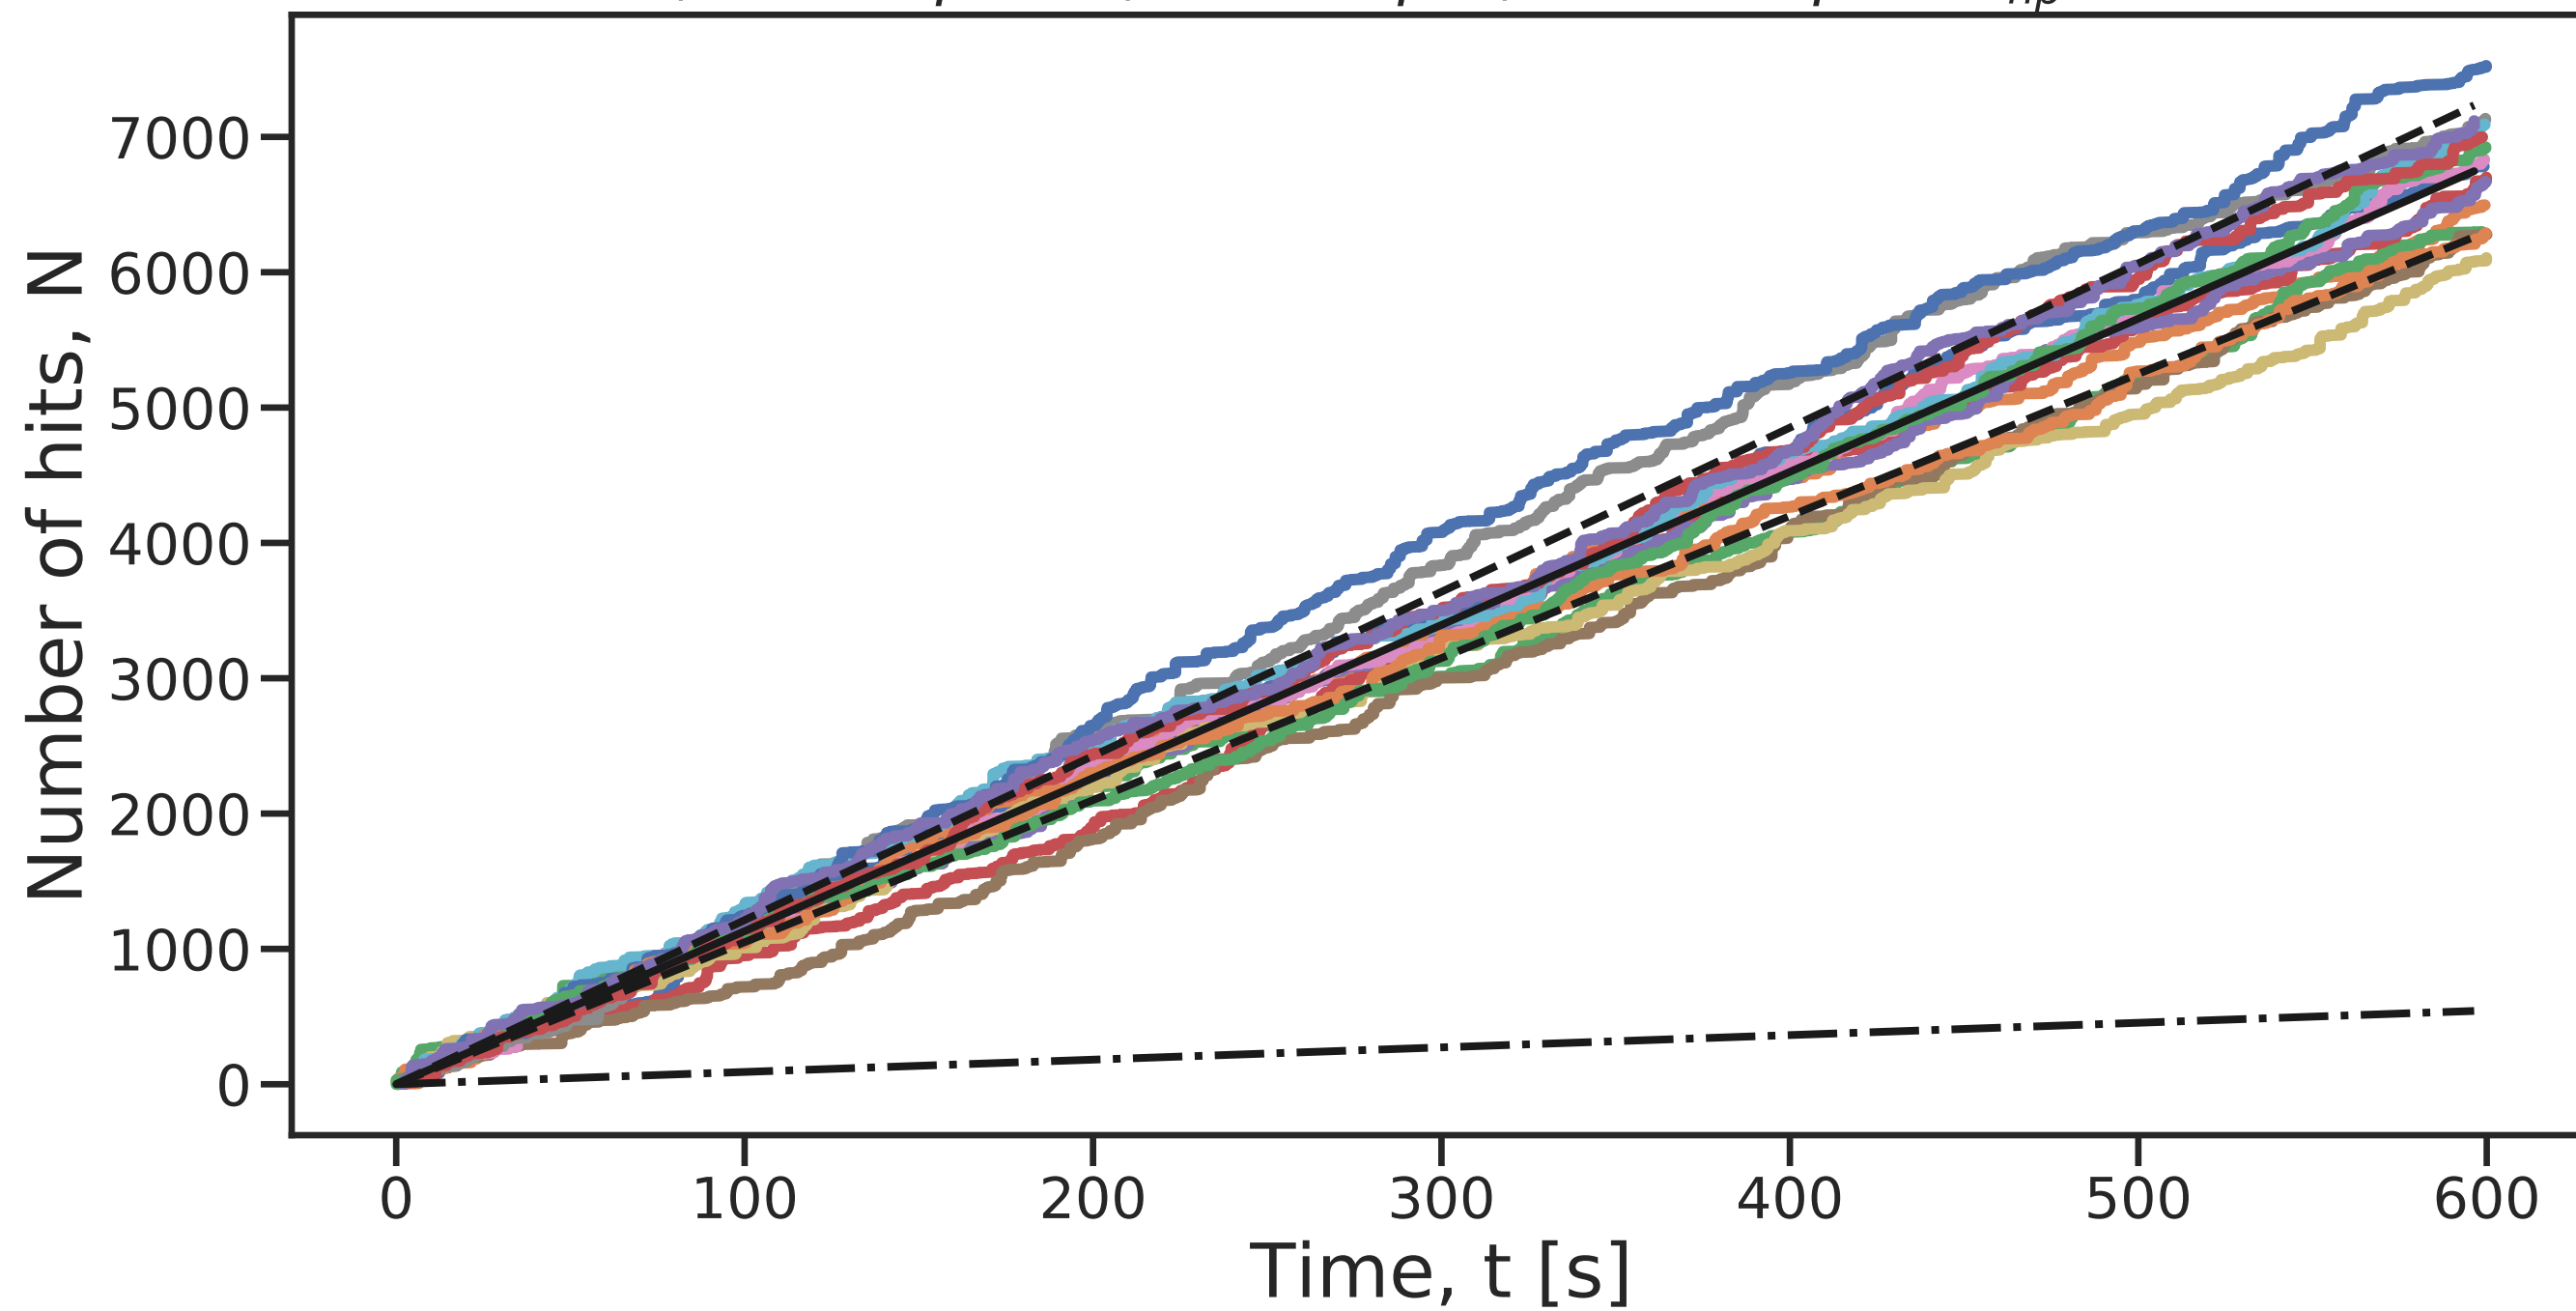

$c = 0.06 \text{ nM}; D = 80 \text{ } \mu\text{m}^2/\text{s}; R = 0.1 \text{ } \mu\text{m}; \Delta t = 1.0 \text{ } \mu\text{s} \langle N_{np} \rangle = 2072.9 \pm 101.3$

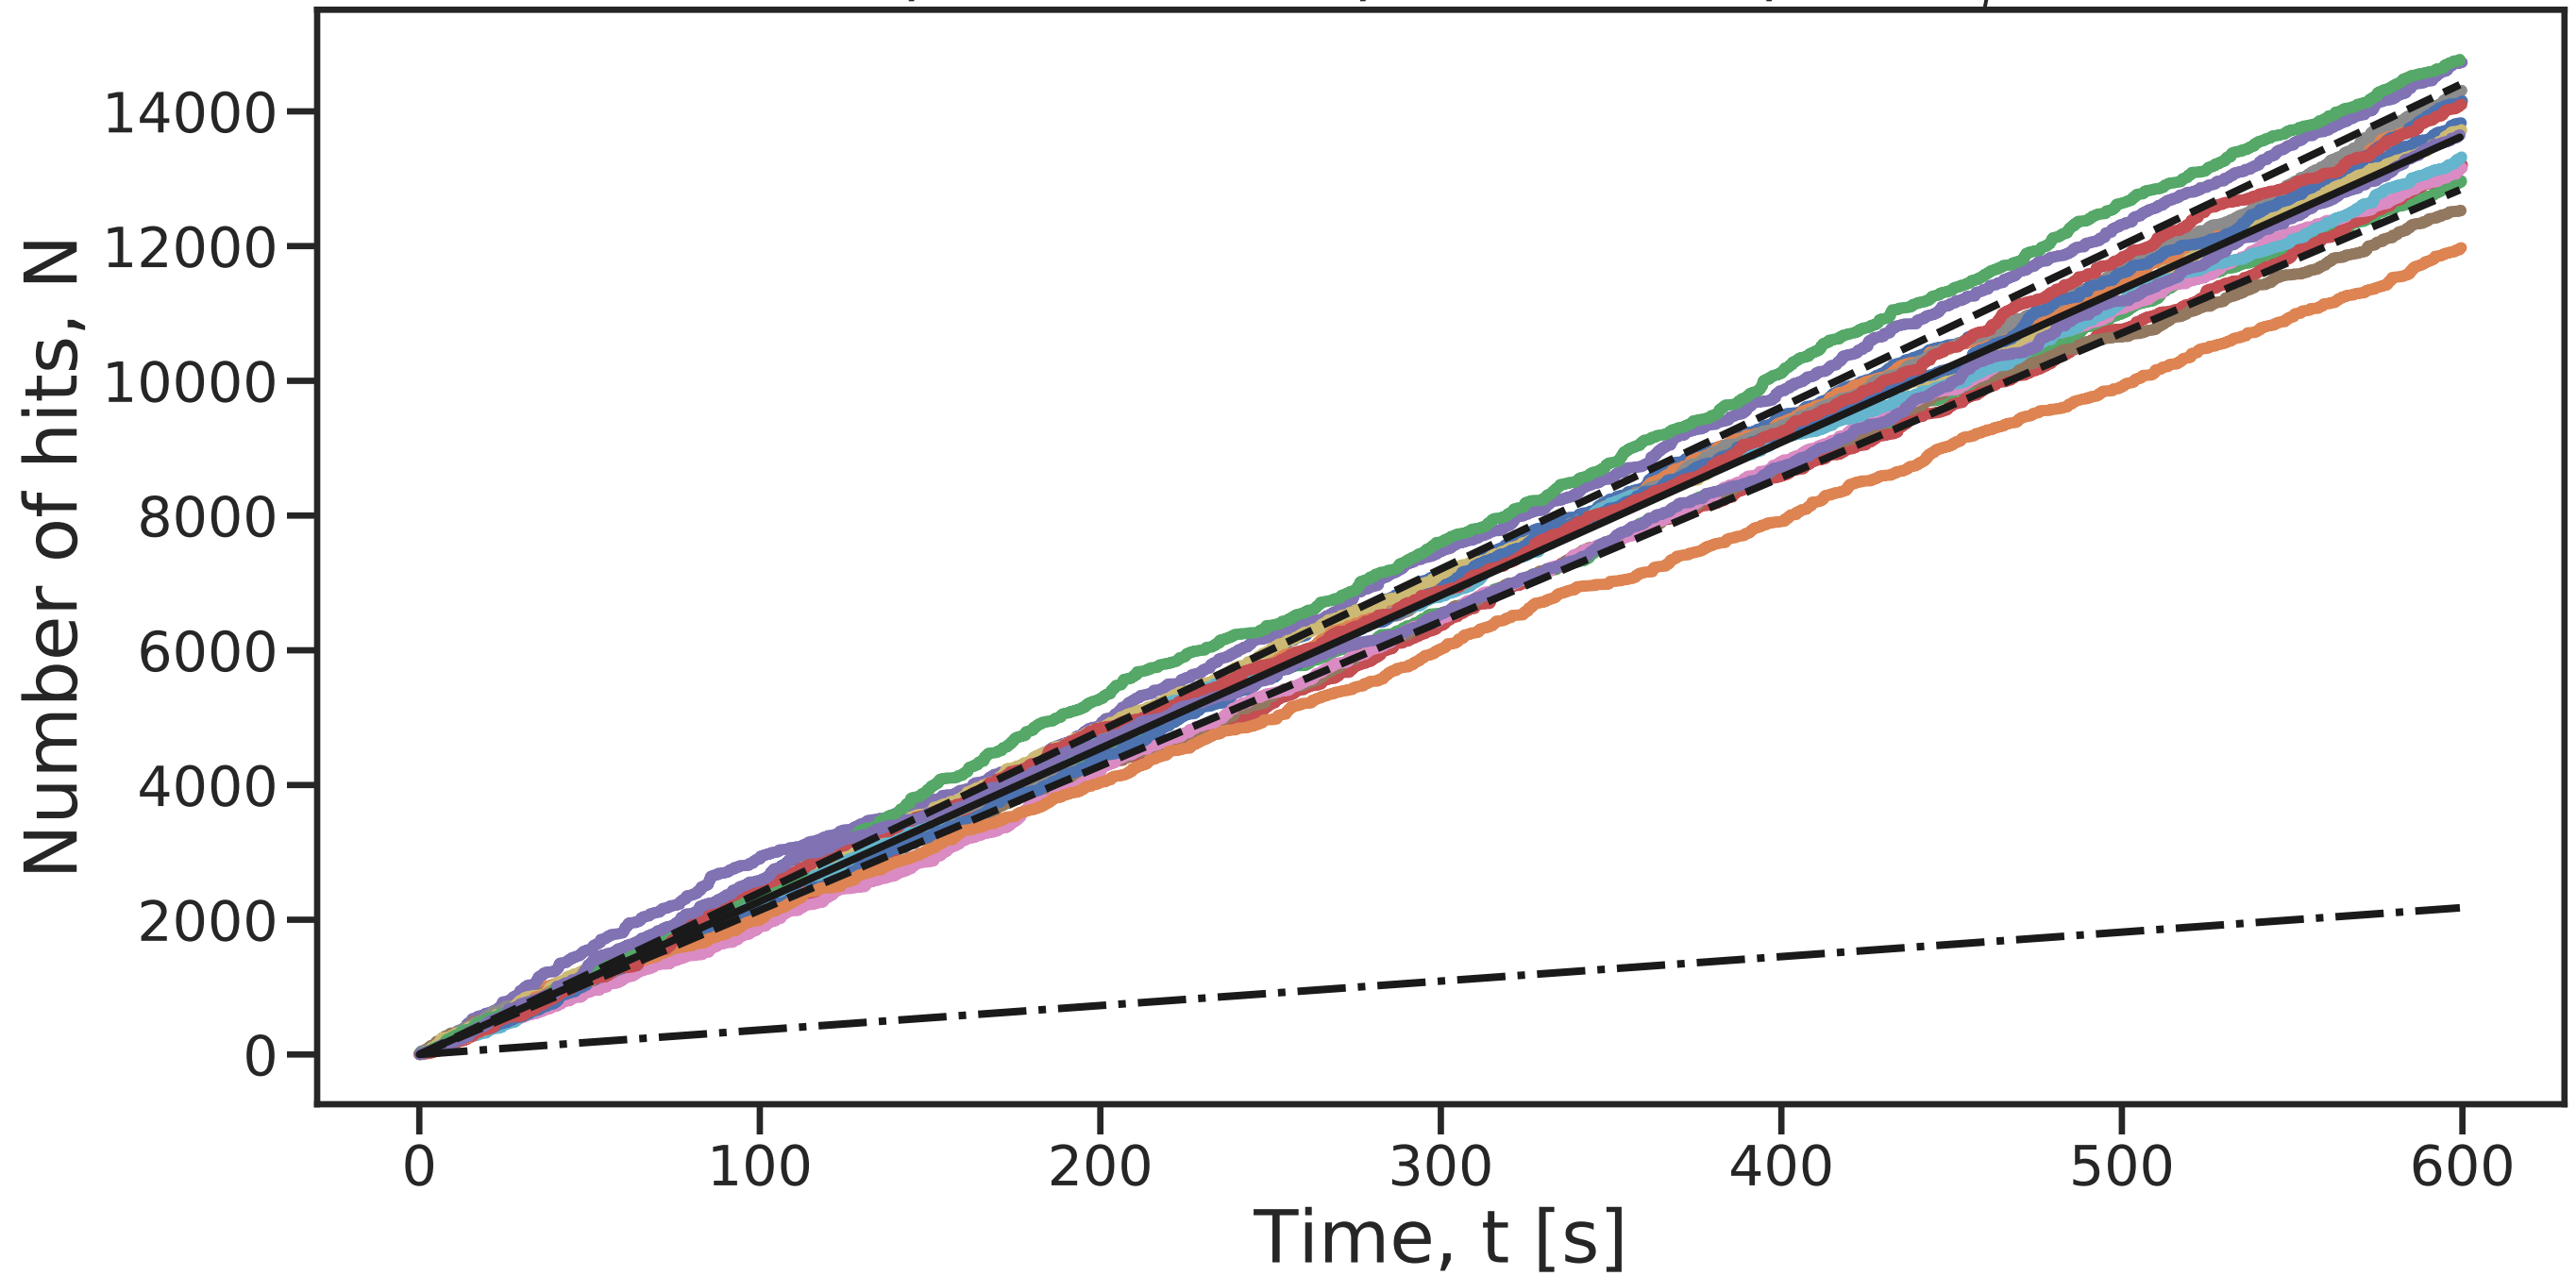

$c = 0.08 \text{ nM}$ ;  $D = 160 \text{ } \mu\text{m}^2/\text{s}$ ;  $R = 0.1 \text{ } \mu\text{m}$ ;  $\Delta t = 1.0 \text{ } \mu\text{s}$   $\langle N_{np} \rangle = 5302.6 \pm 225.8$

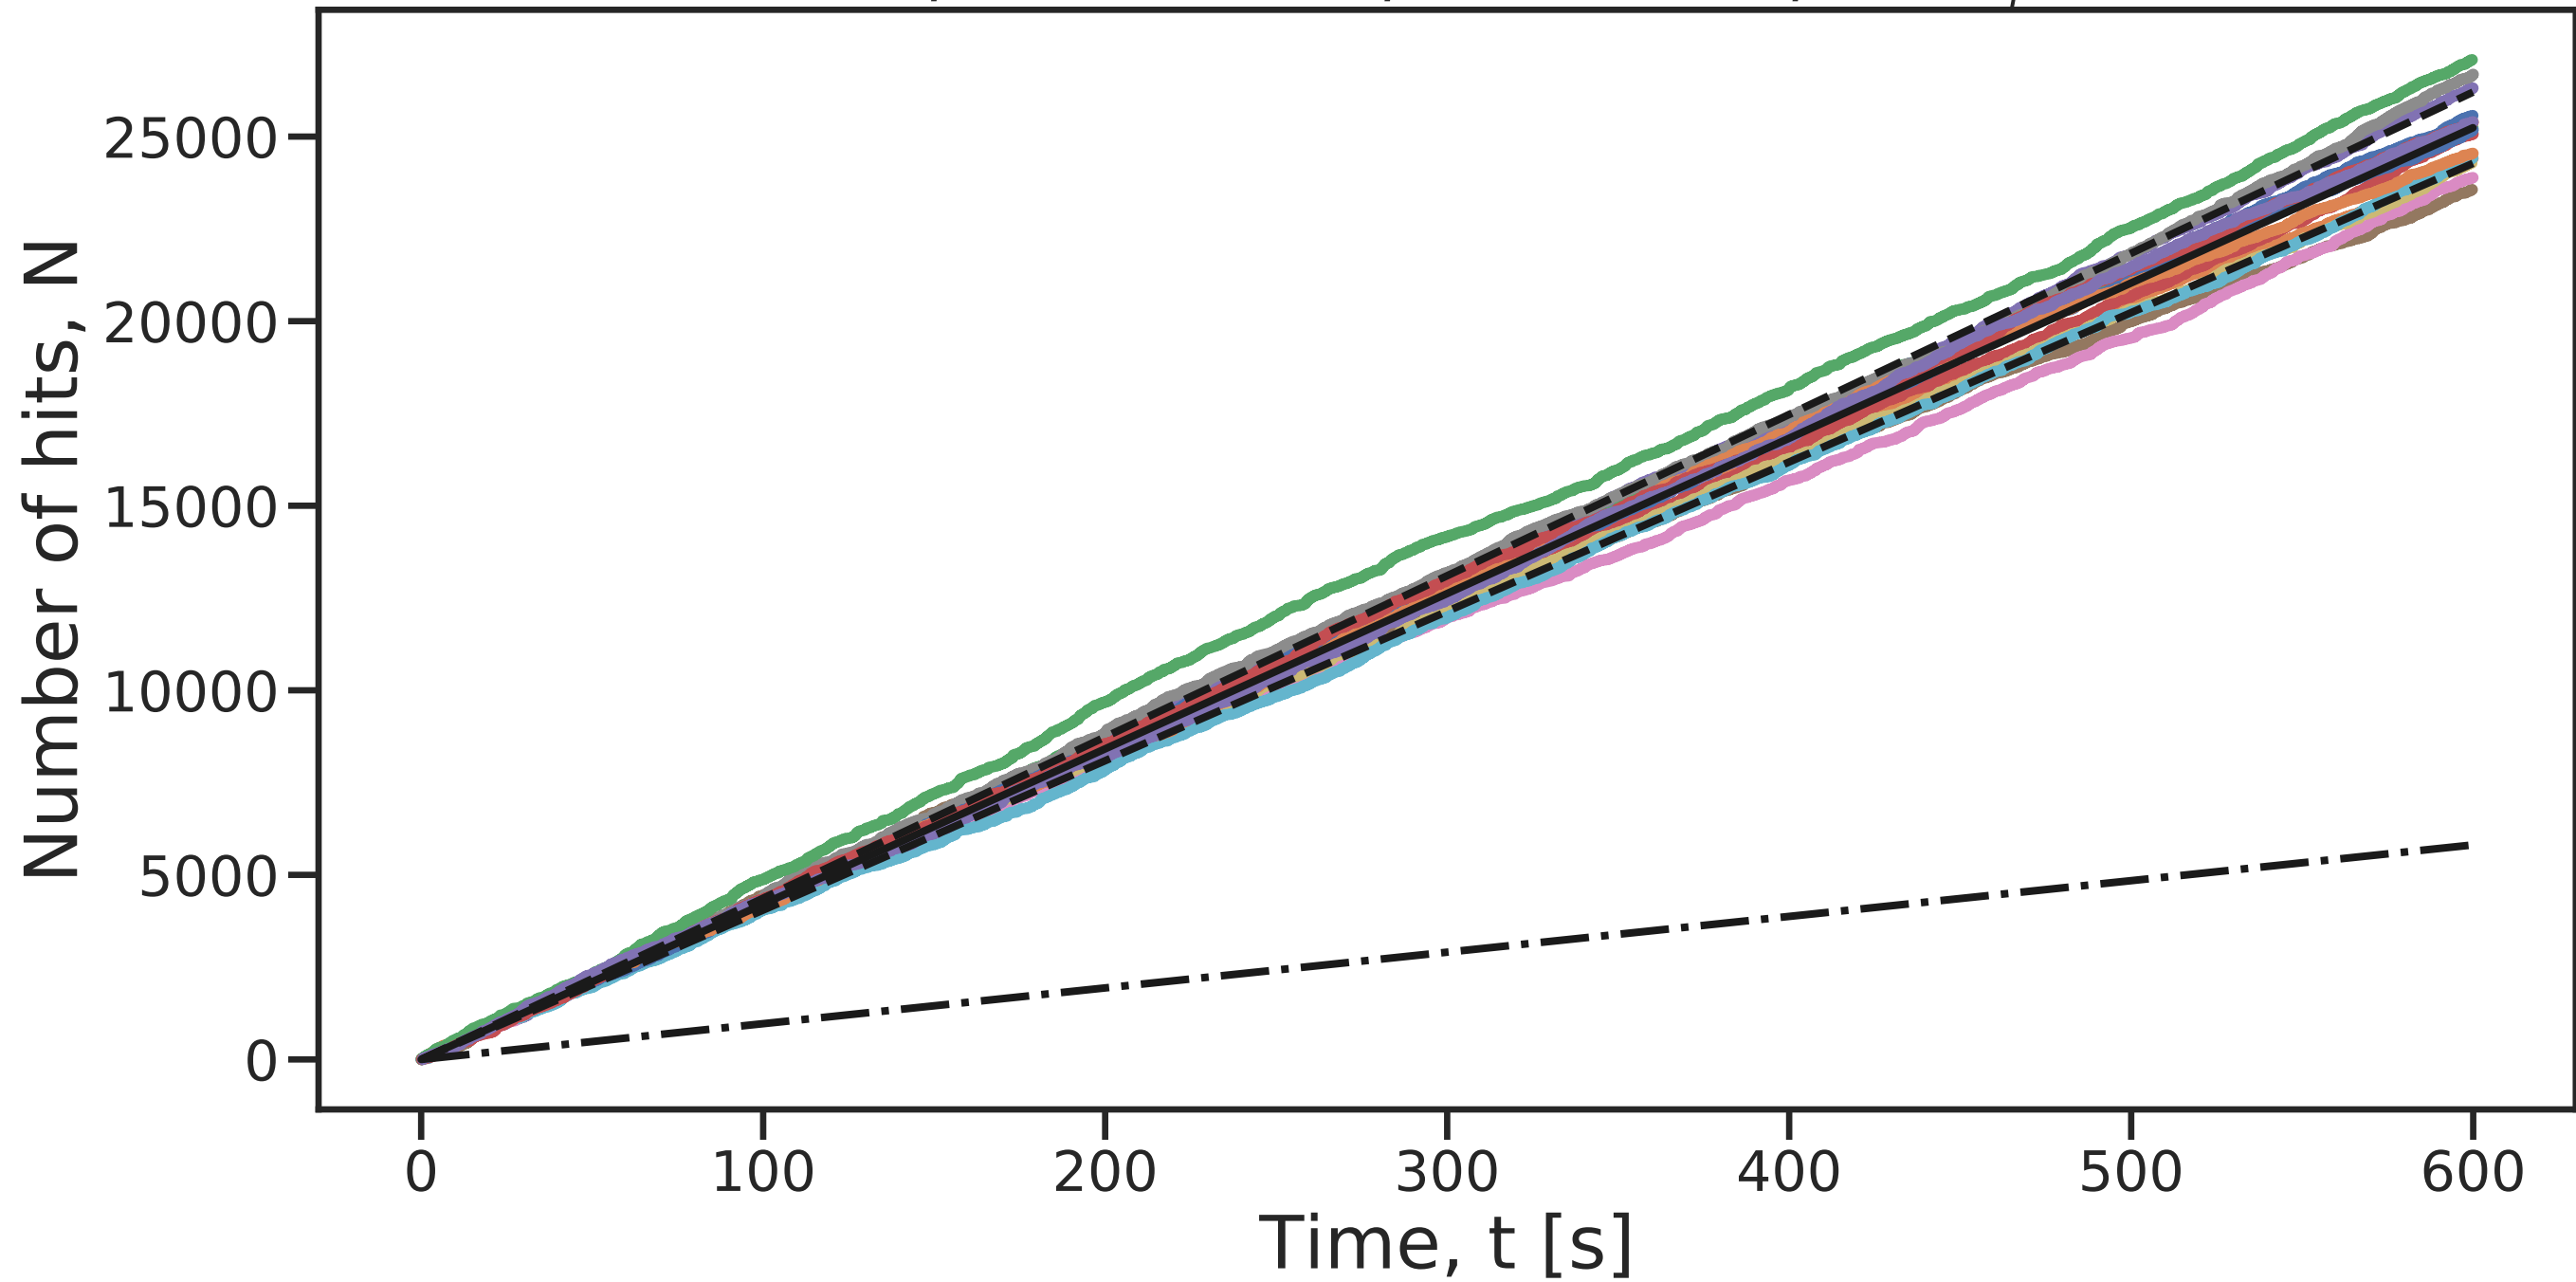

$c = 0.08 \text{ nM}; D = 20 \mu\text{m}^2/\text{s}; R = 0.1 \mu\text{m}; \Delta t = 1.0 \mu\text{s} \langle N_{np} \rangle = 707.9 \pm 39.7$

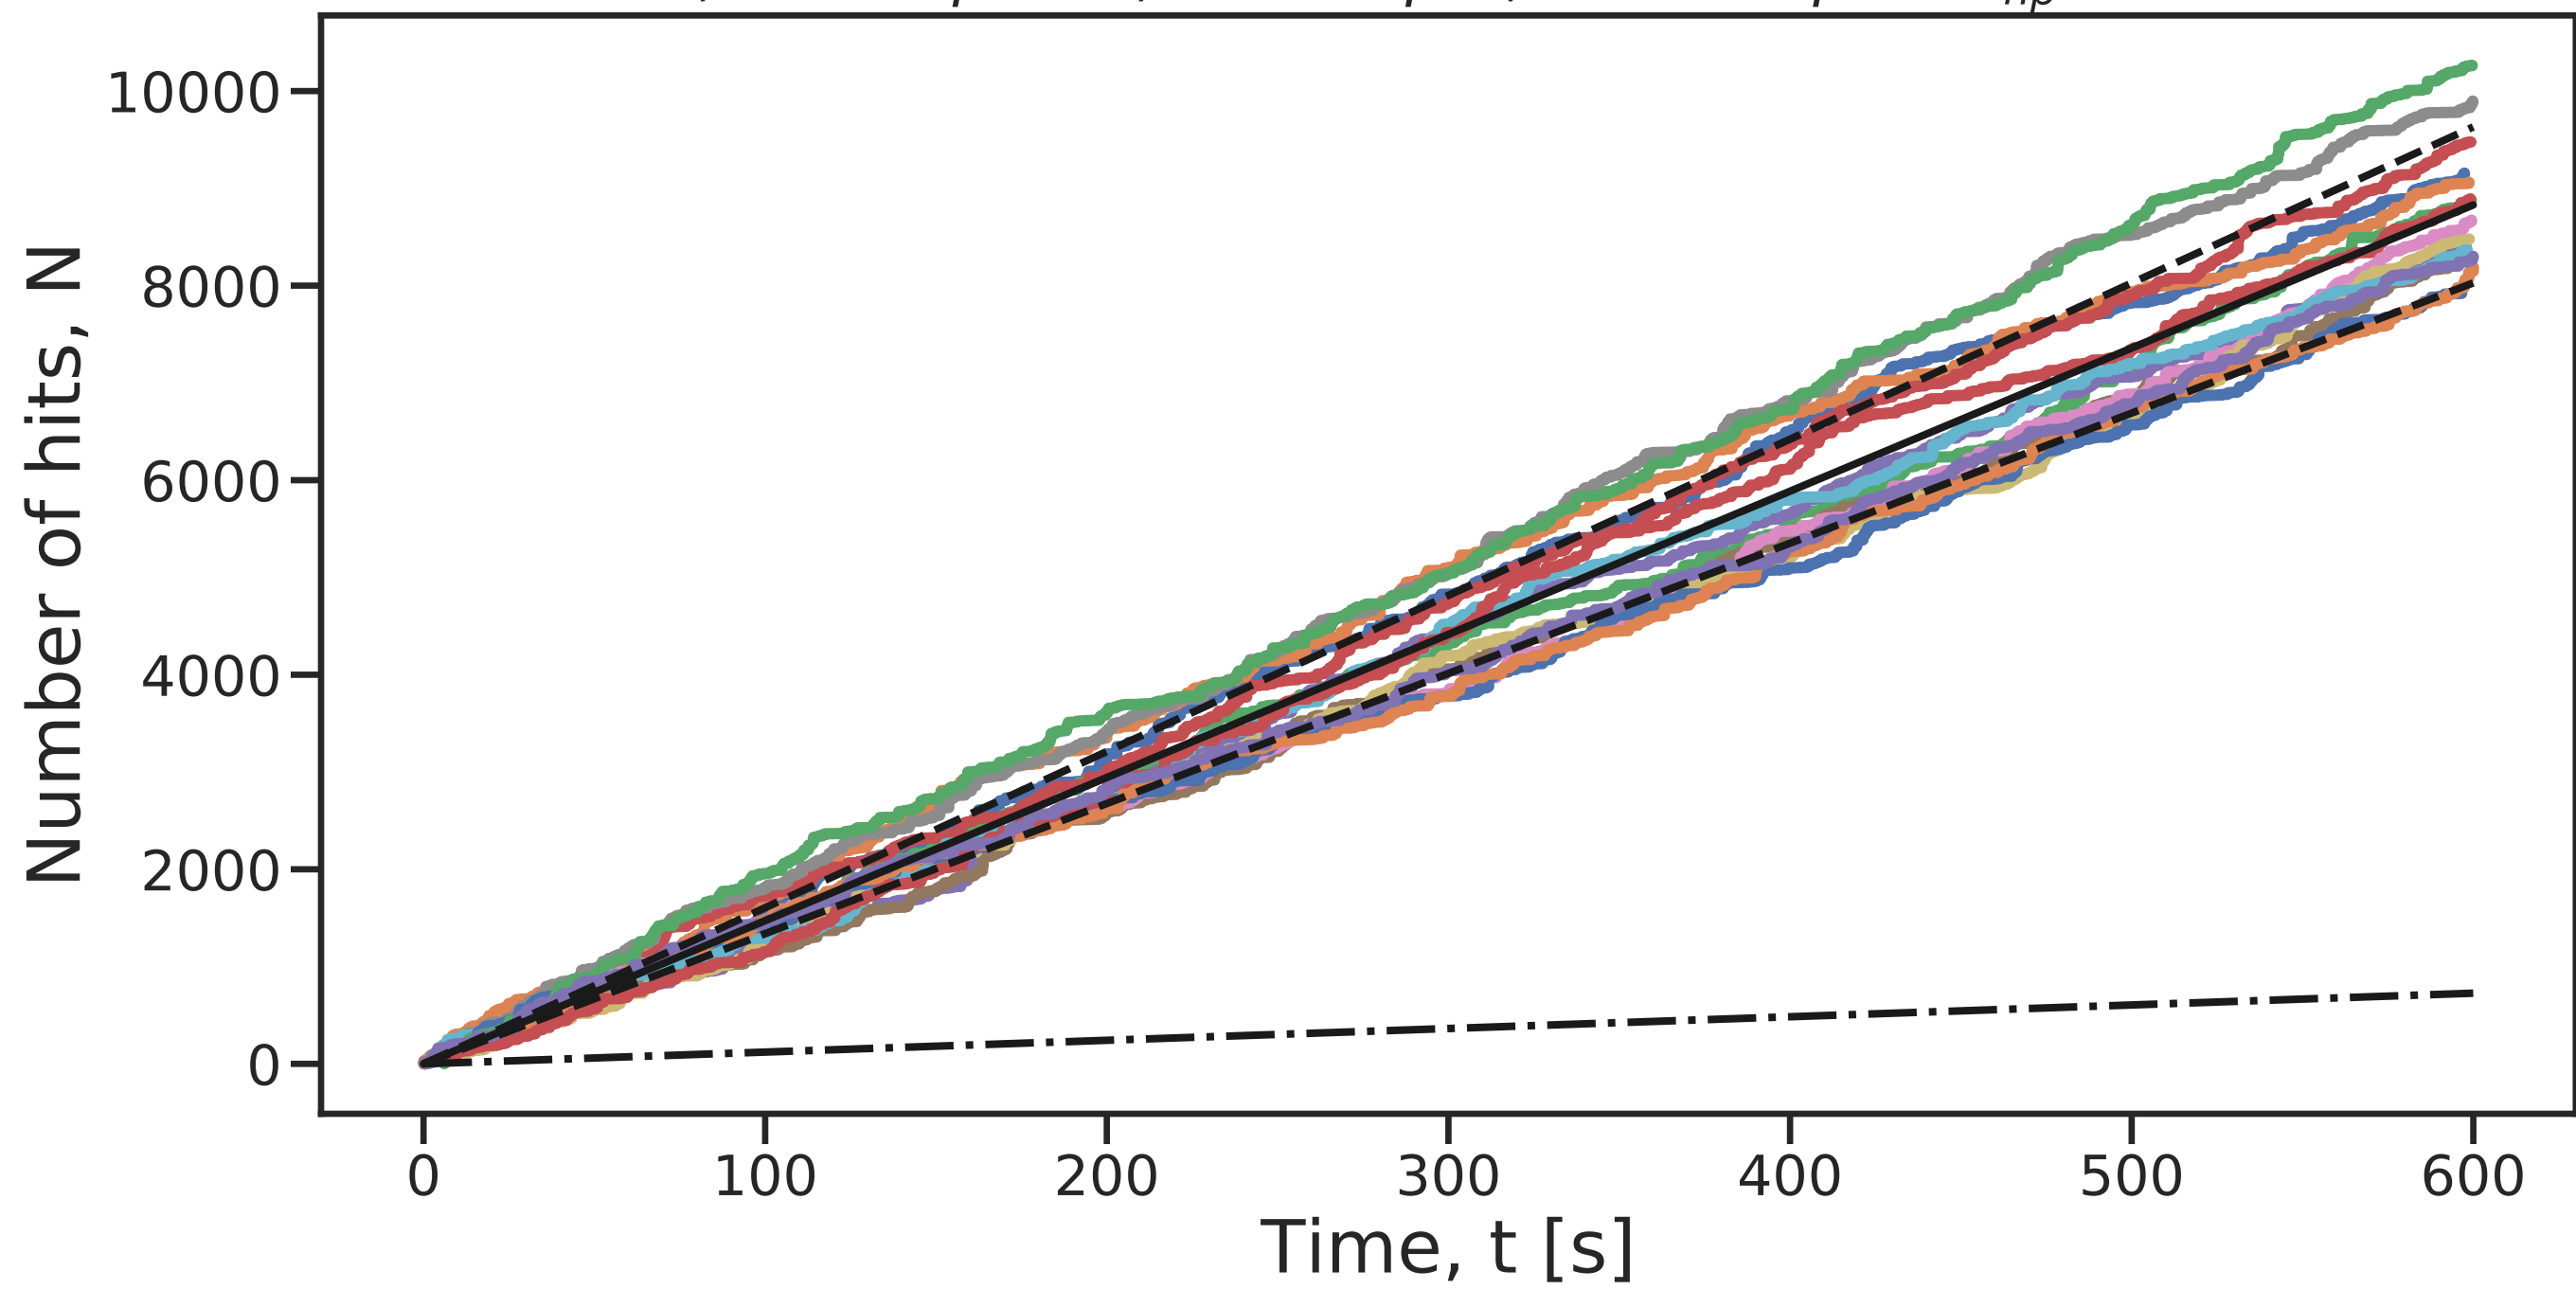

$c = 0.08 \text{ nM}$ ;  $D = 80 \text{ } \mu\text{m}^2/\text{s}$ ;  $R = 0.1 \text{ } \mu\text{m}$ ;  $\Delta t = 1.0 \text{ } \mu\text{s}$   $\langle N_{np} \rangle = 2749.5 \pm 114.1$

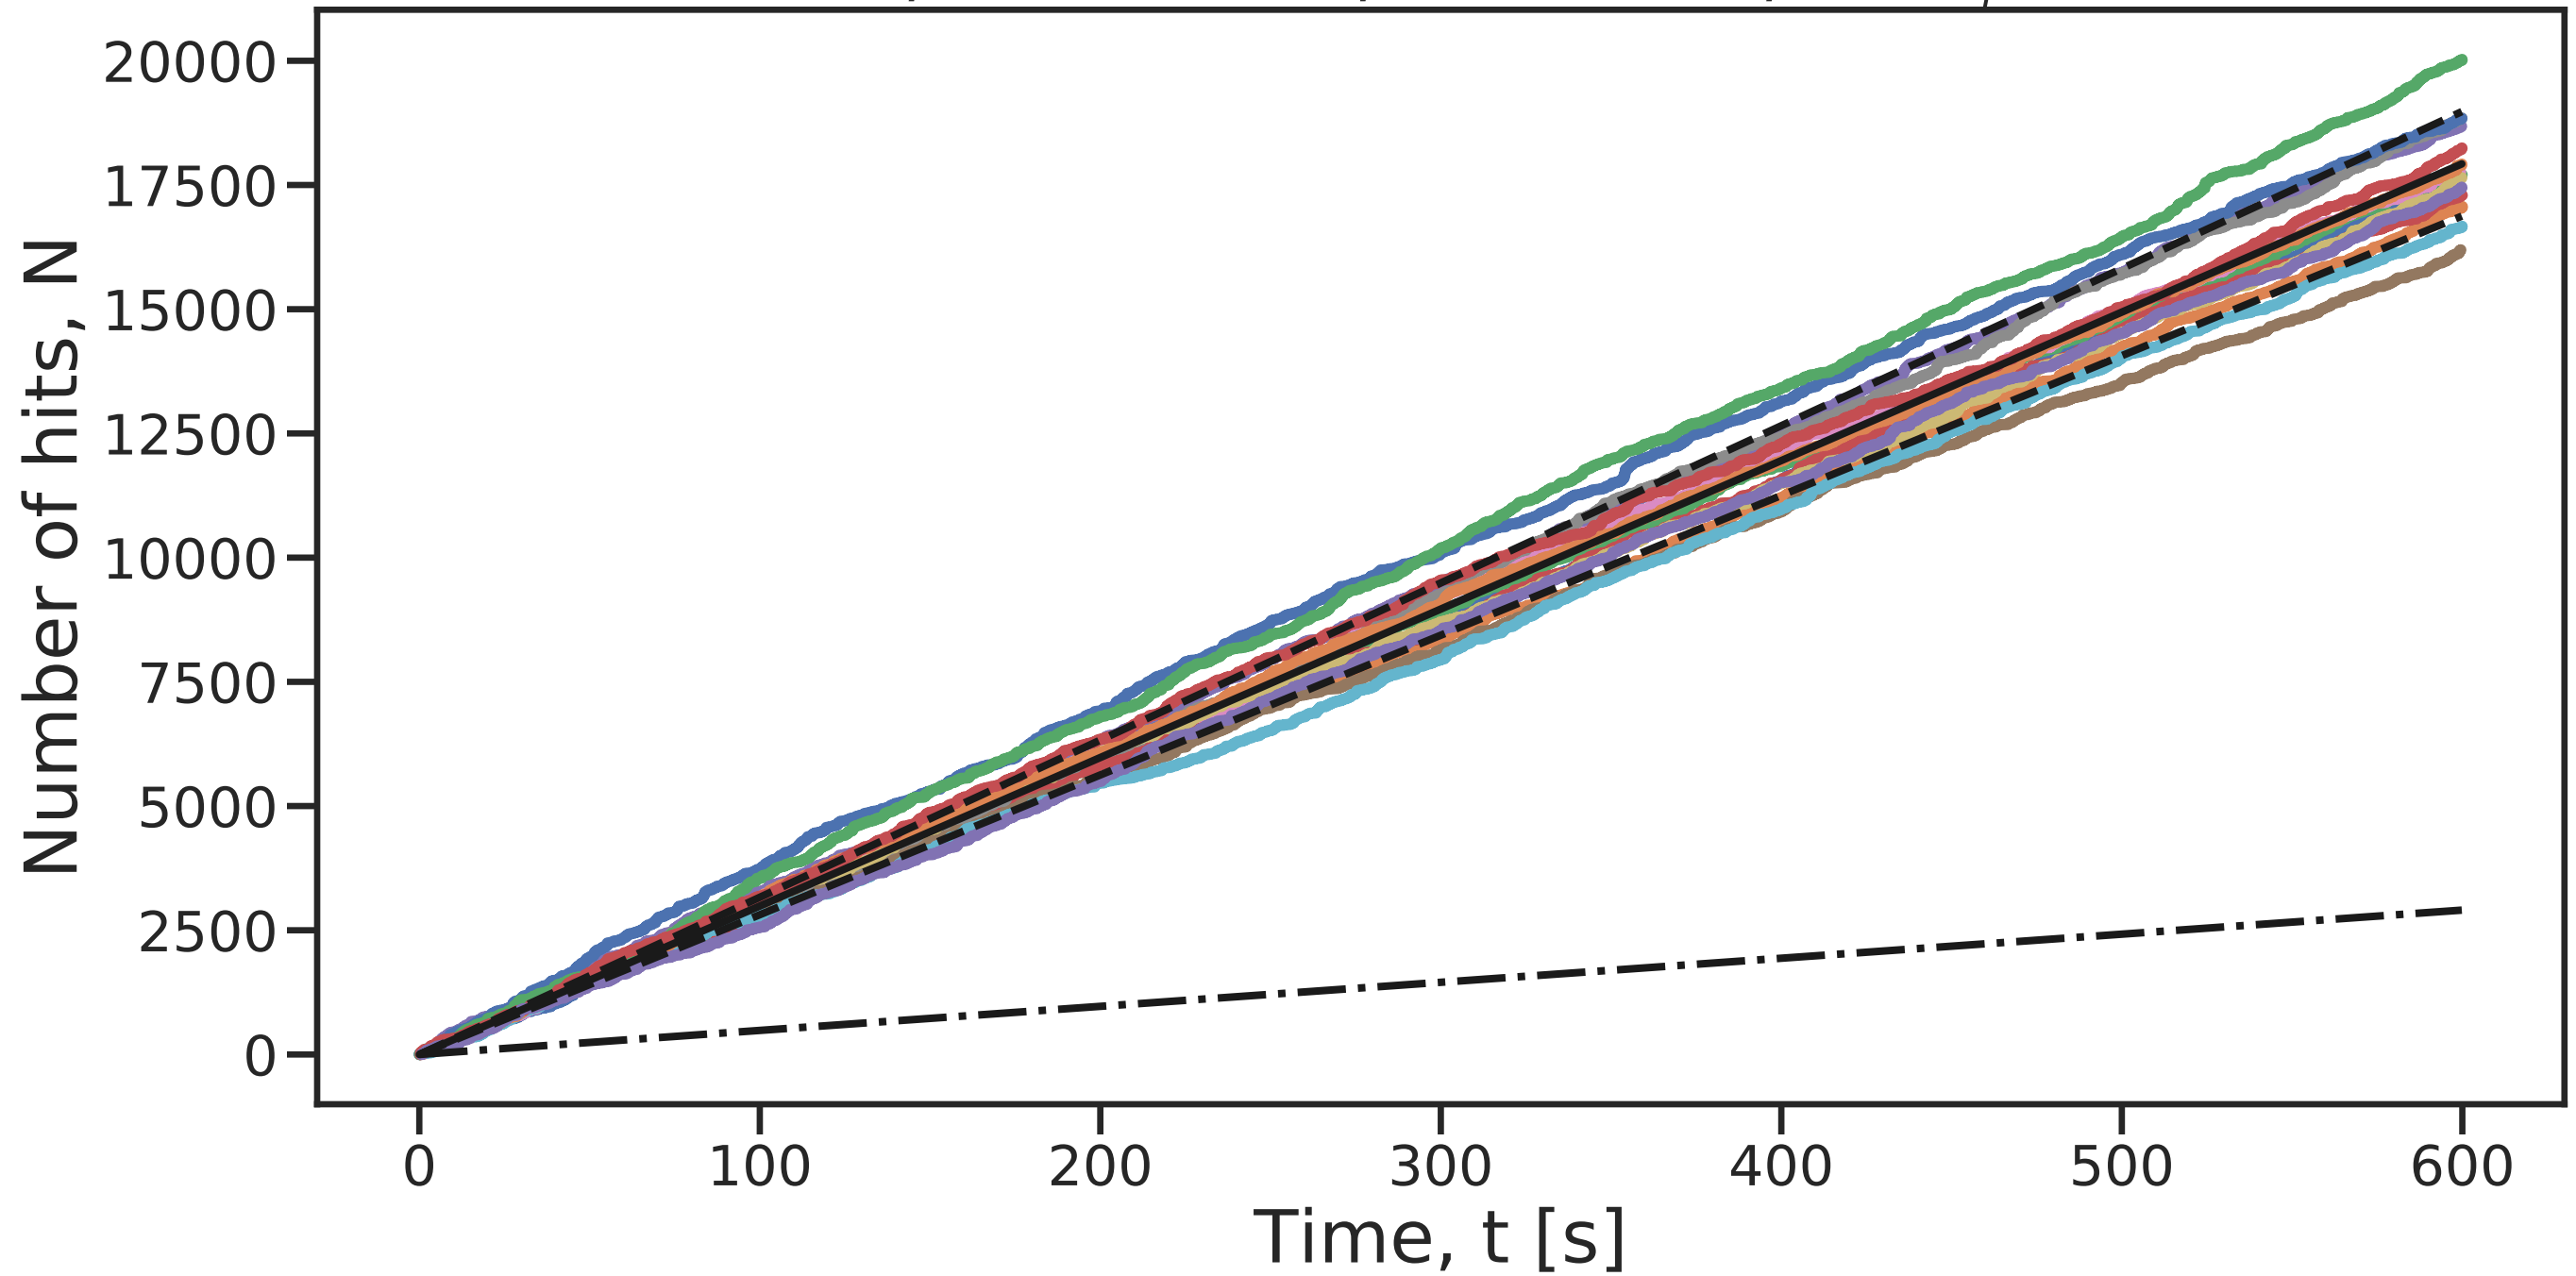

$$c = 0.12 \text{ nM}; D = 160 \mu m^2/s; R = 0.1 \mu m; \Delta t = 1.0 \mu s \langle N_{np} \rangle = 8061.9 \pm 205.0$$
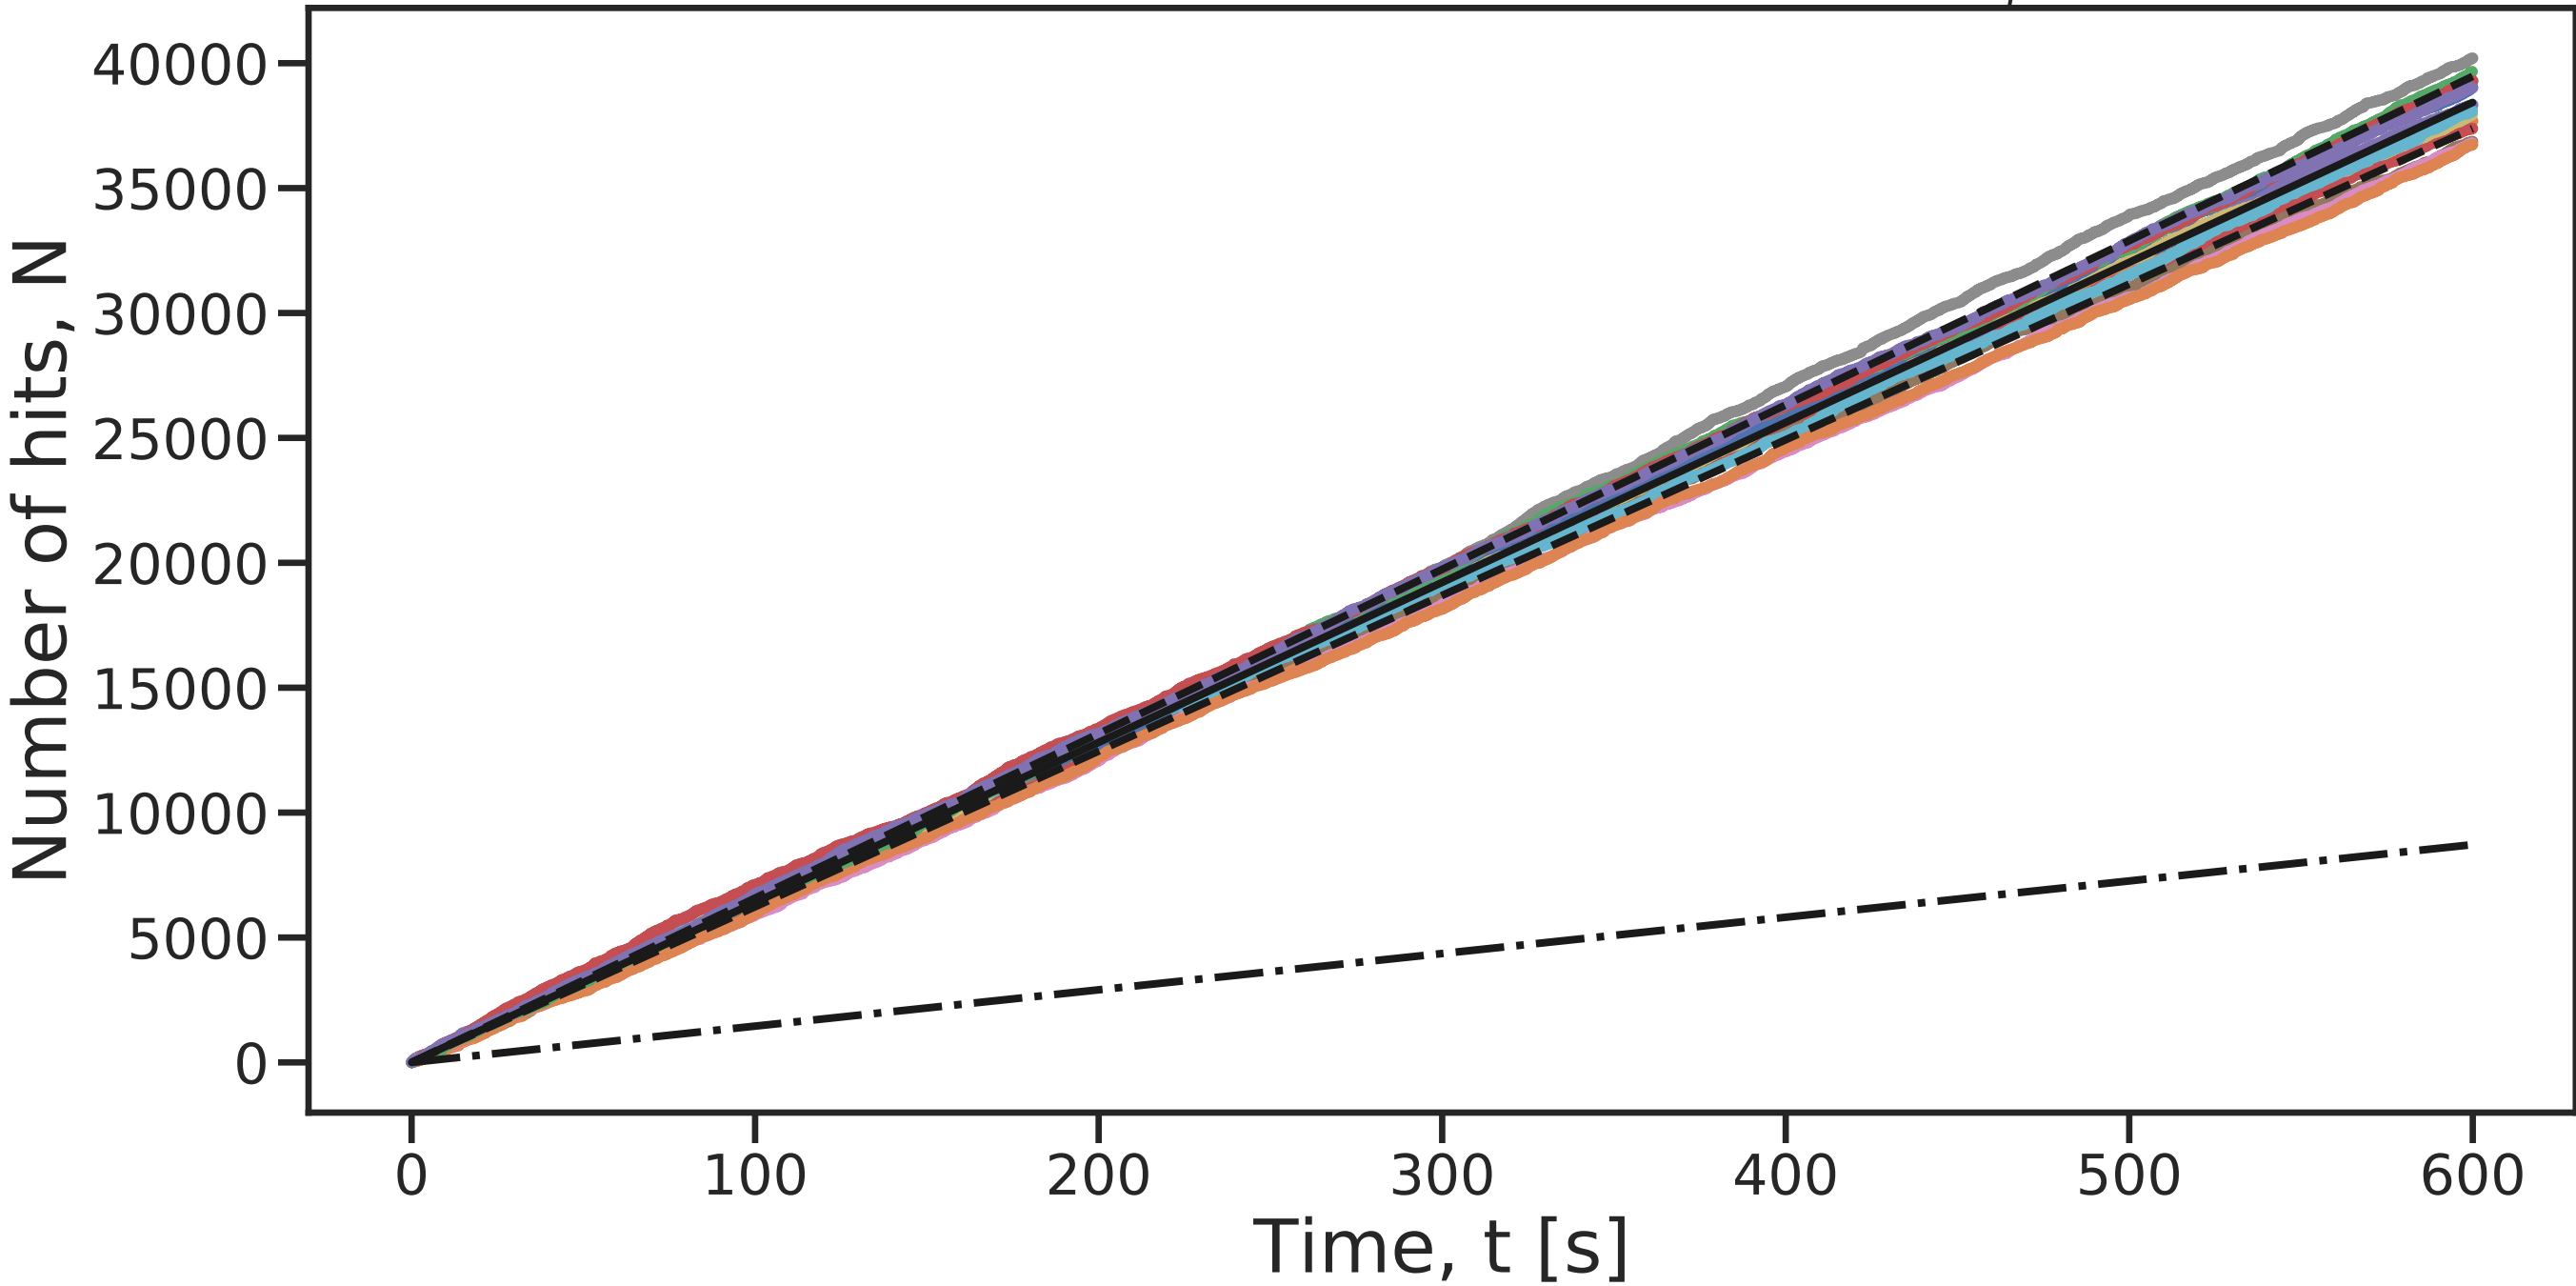

$c = 0.12 \text{ nM}; D = 20 \mu\text{m}^2/\text{s}; R = 0.1 \mu\text{m}; \Delta t = 1.0 \mu\text{s} \langle N_{np} \rangle = 1073.6 \pm 39.6$

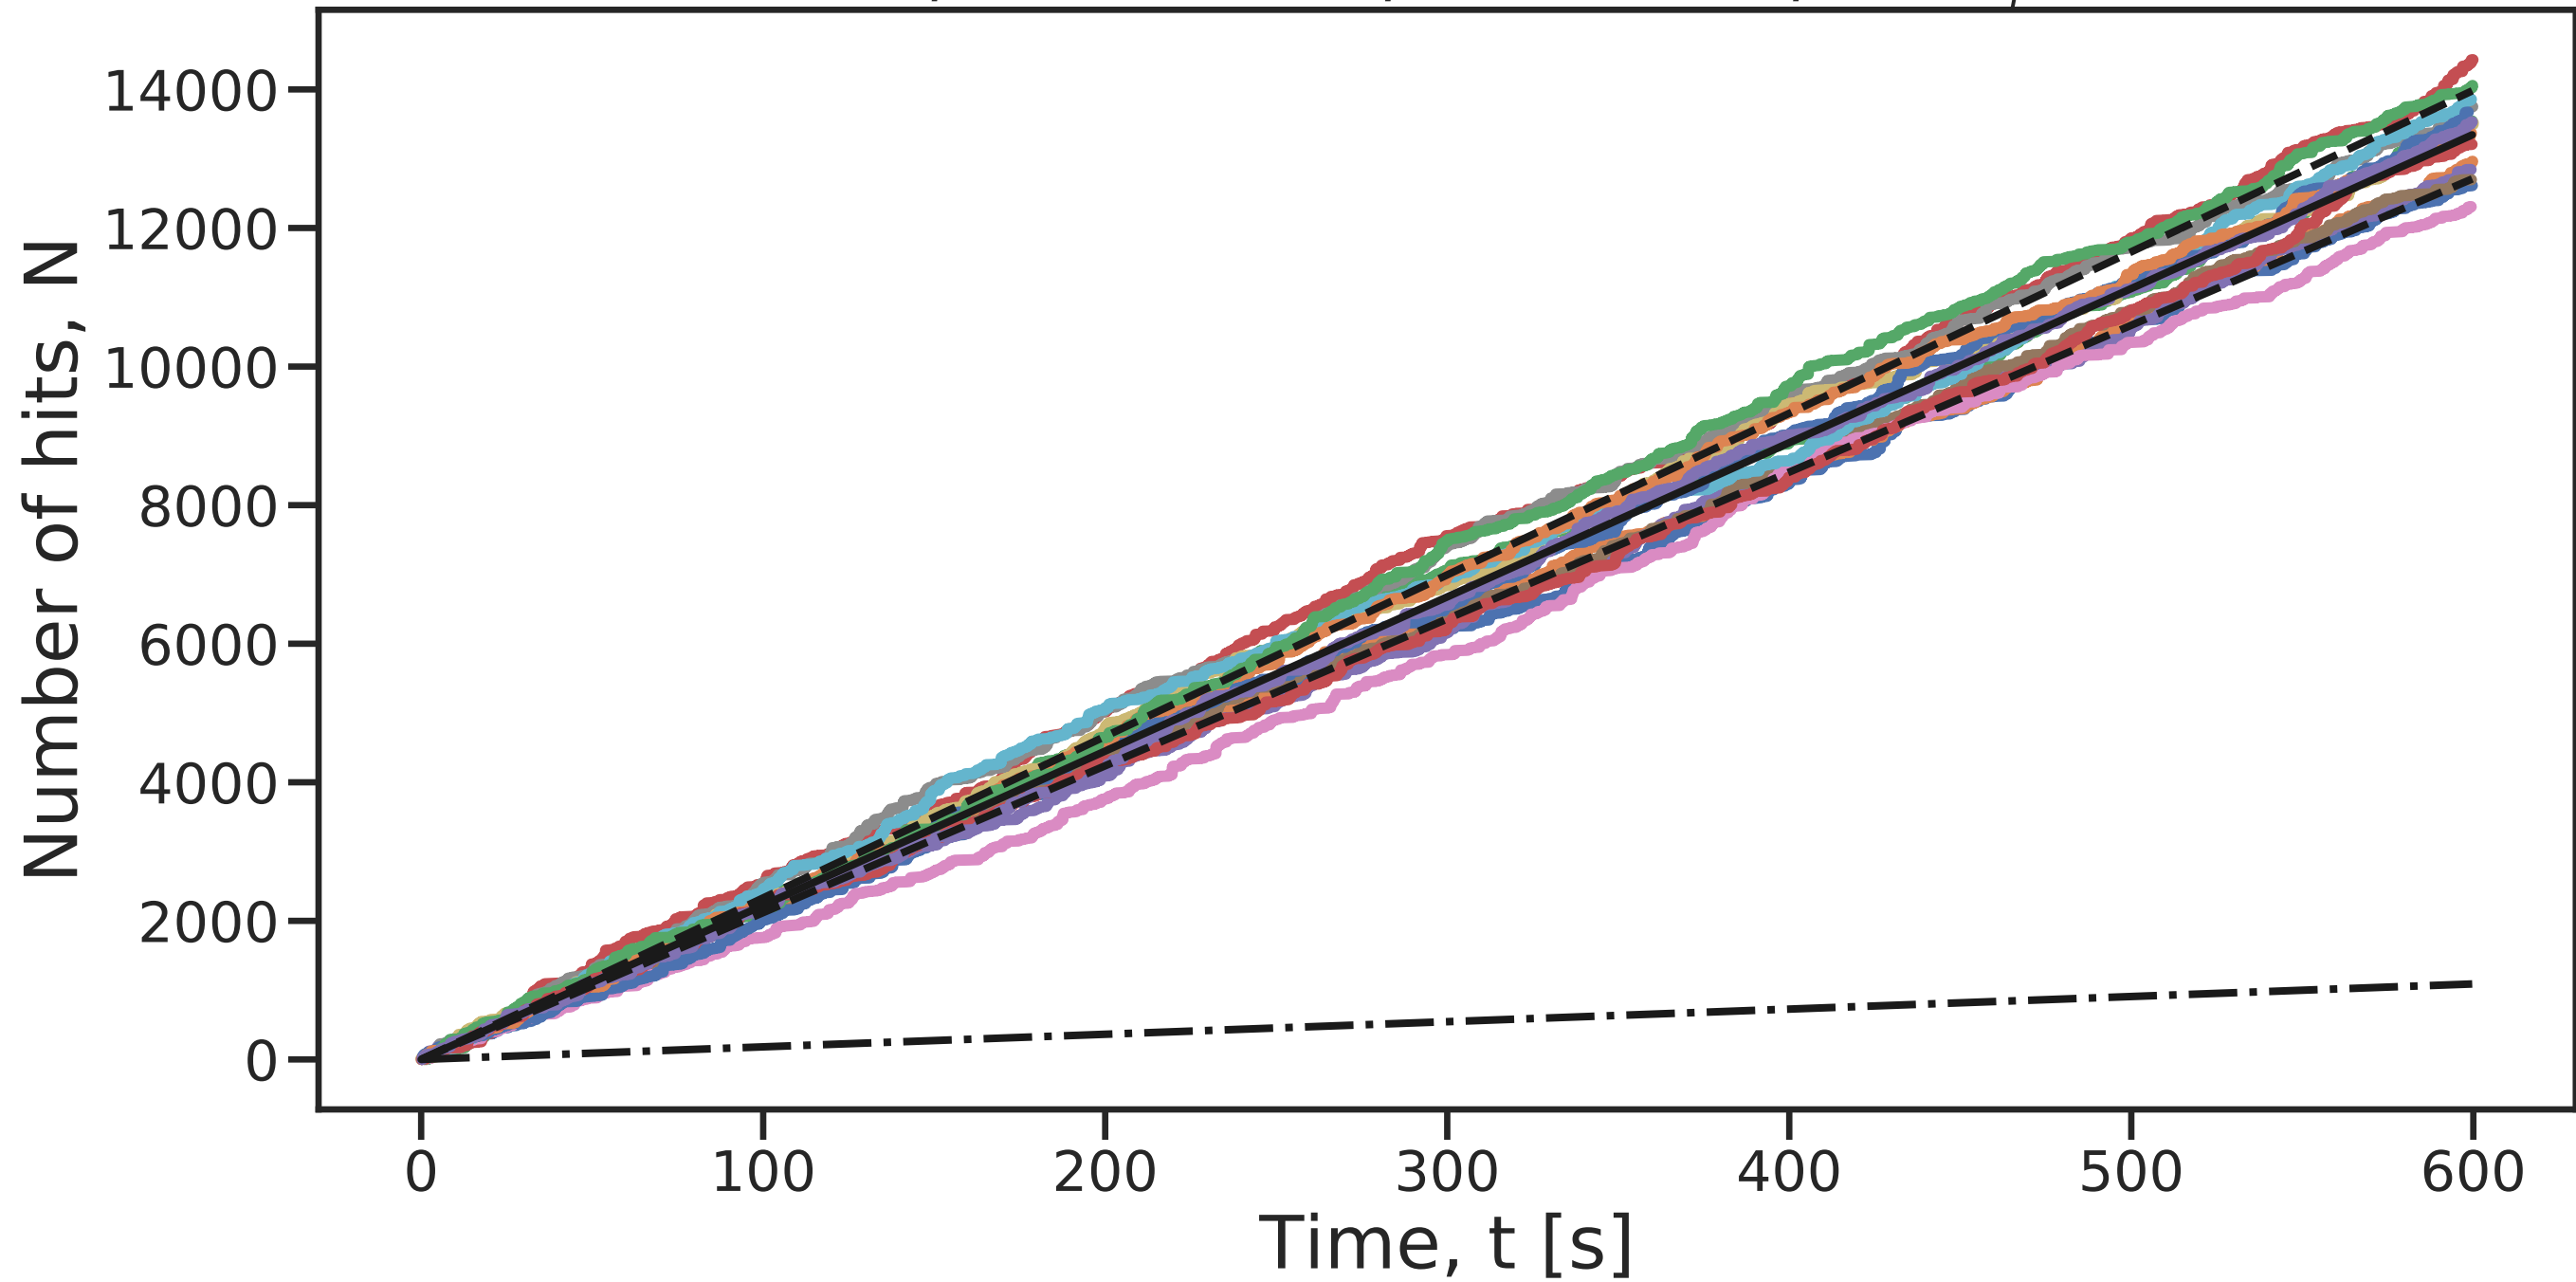



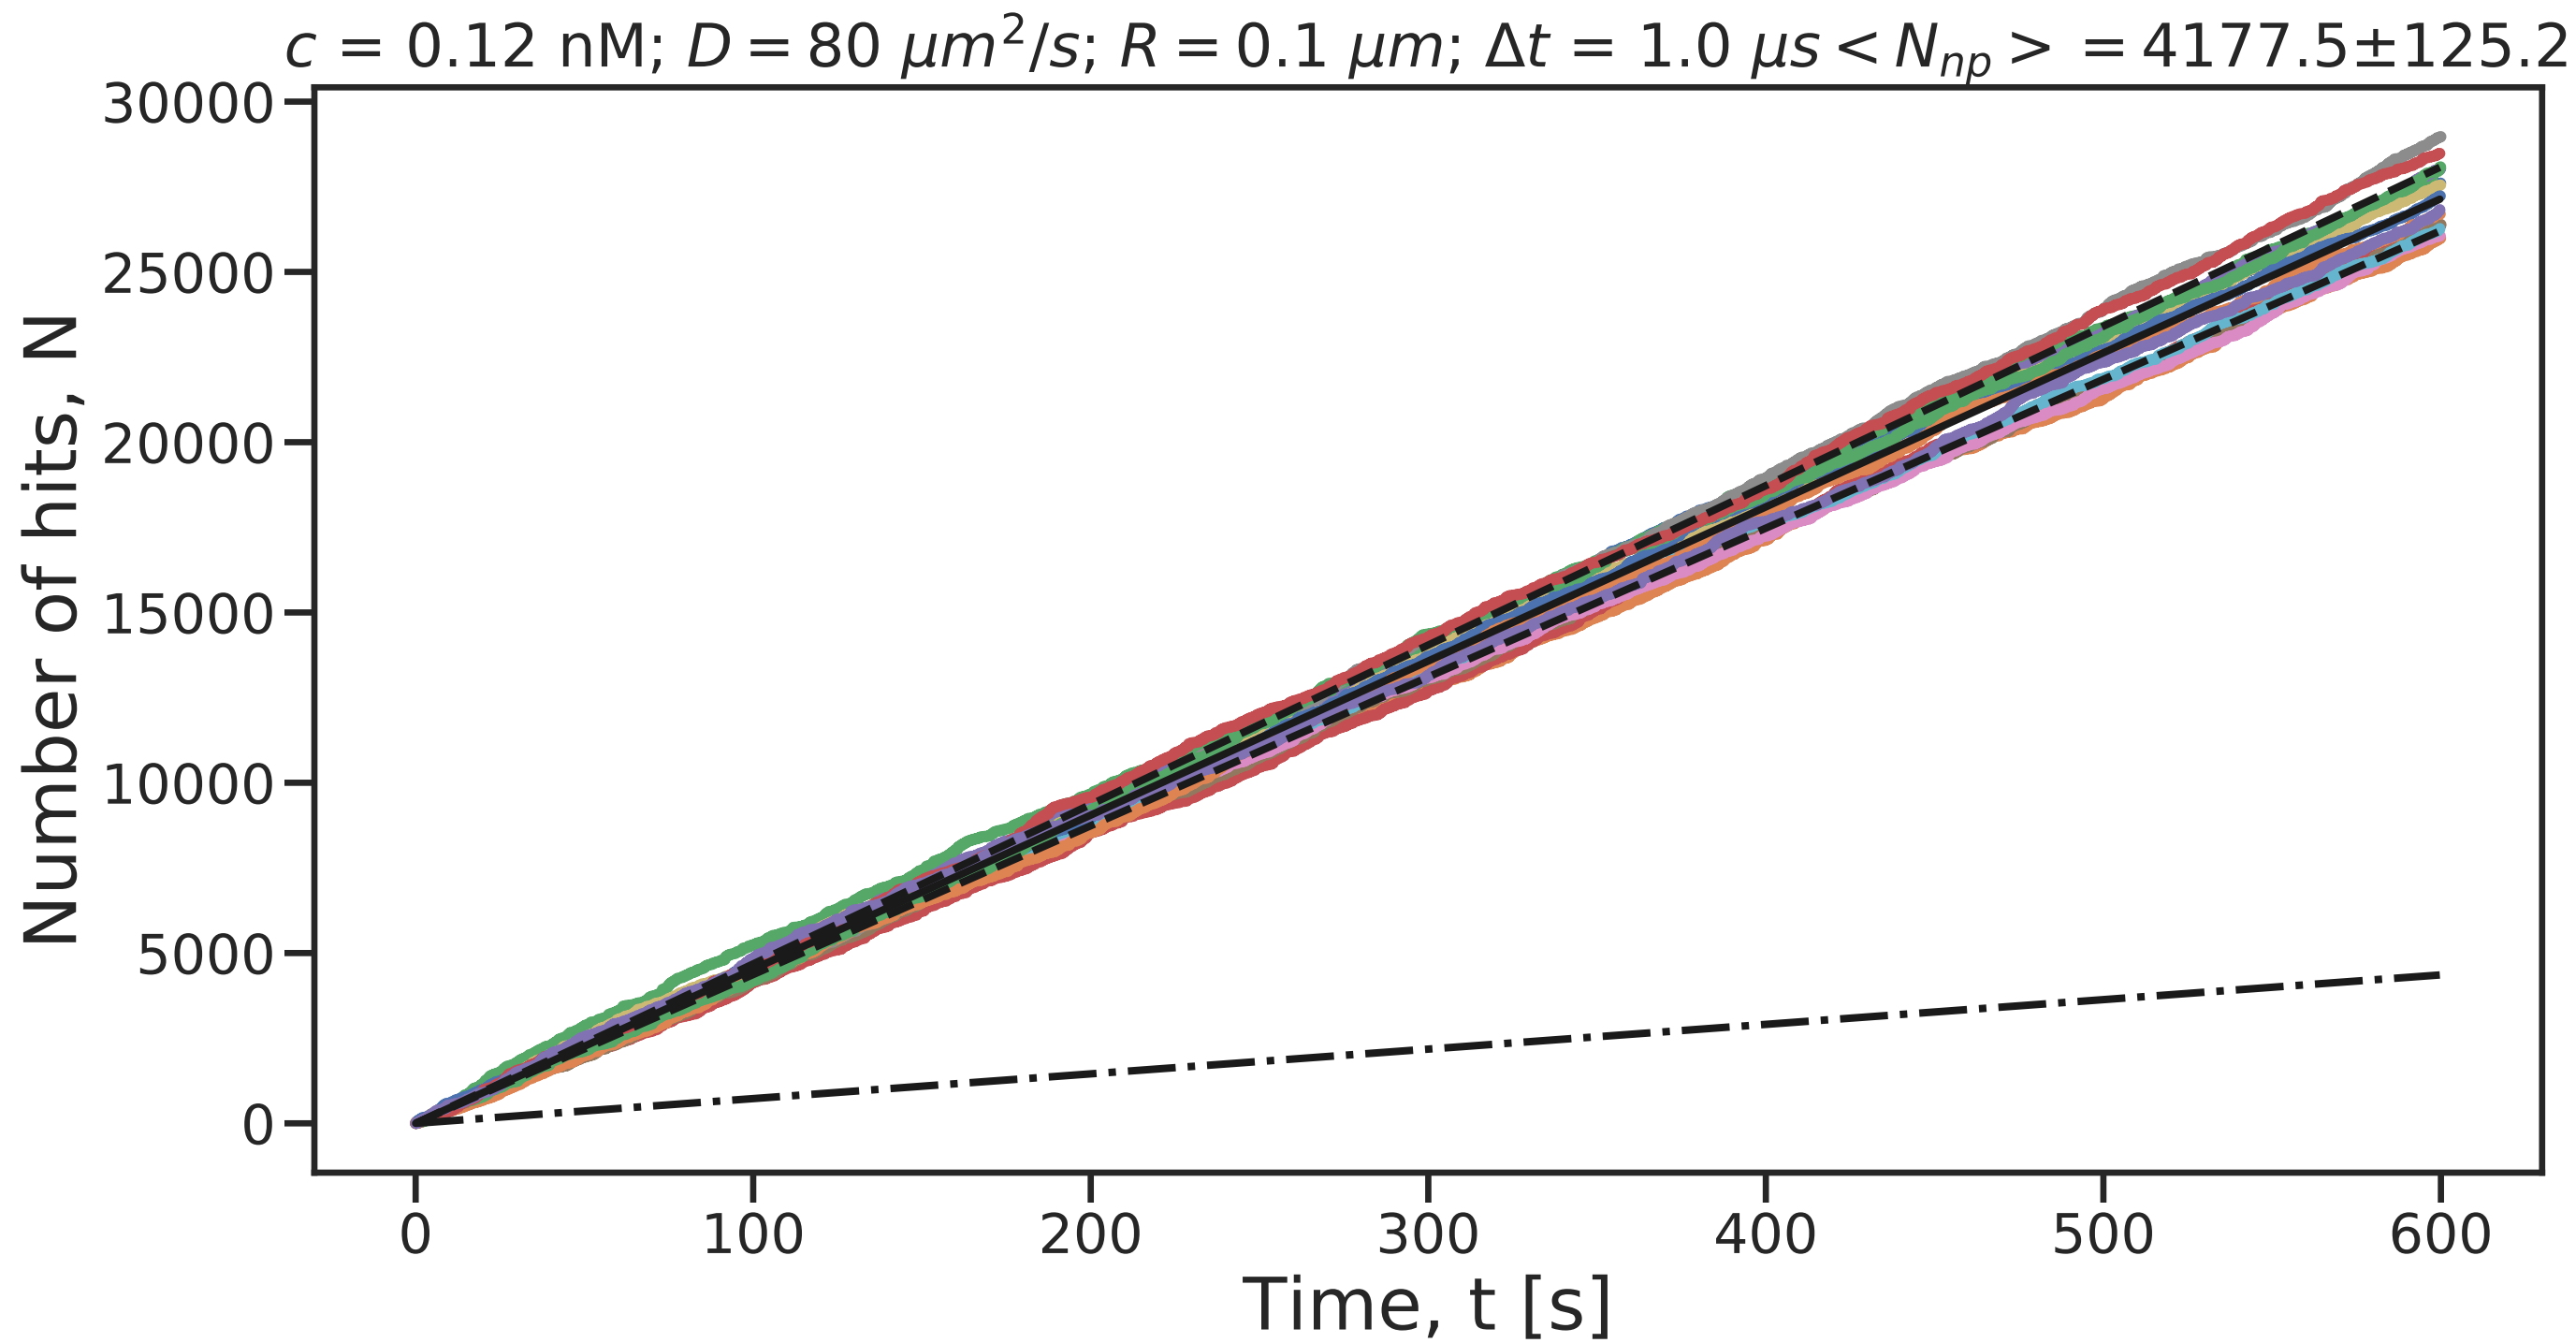

$c = 0.2 \text{ nM}$ ;  $D = 80 \text{ } \mu\text{m}^2/\text{s}$ ;  $R = 0.1 \text{ } \mu\text{m}$ ;  $\Delta t = 1.0 \text{ } \mu\text{s}$   $\langle N_{np} \rangle = 68.1 \pm 20.9$

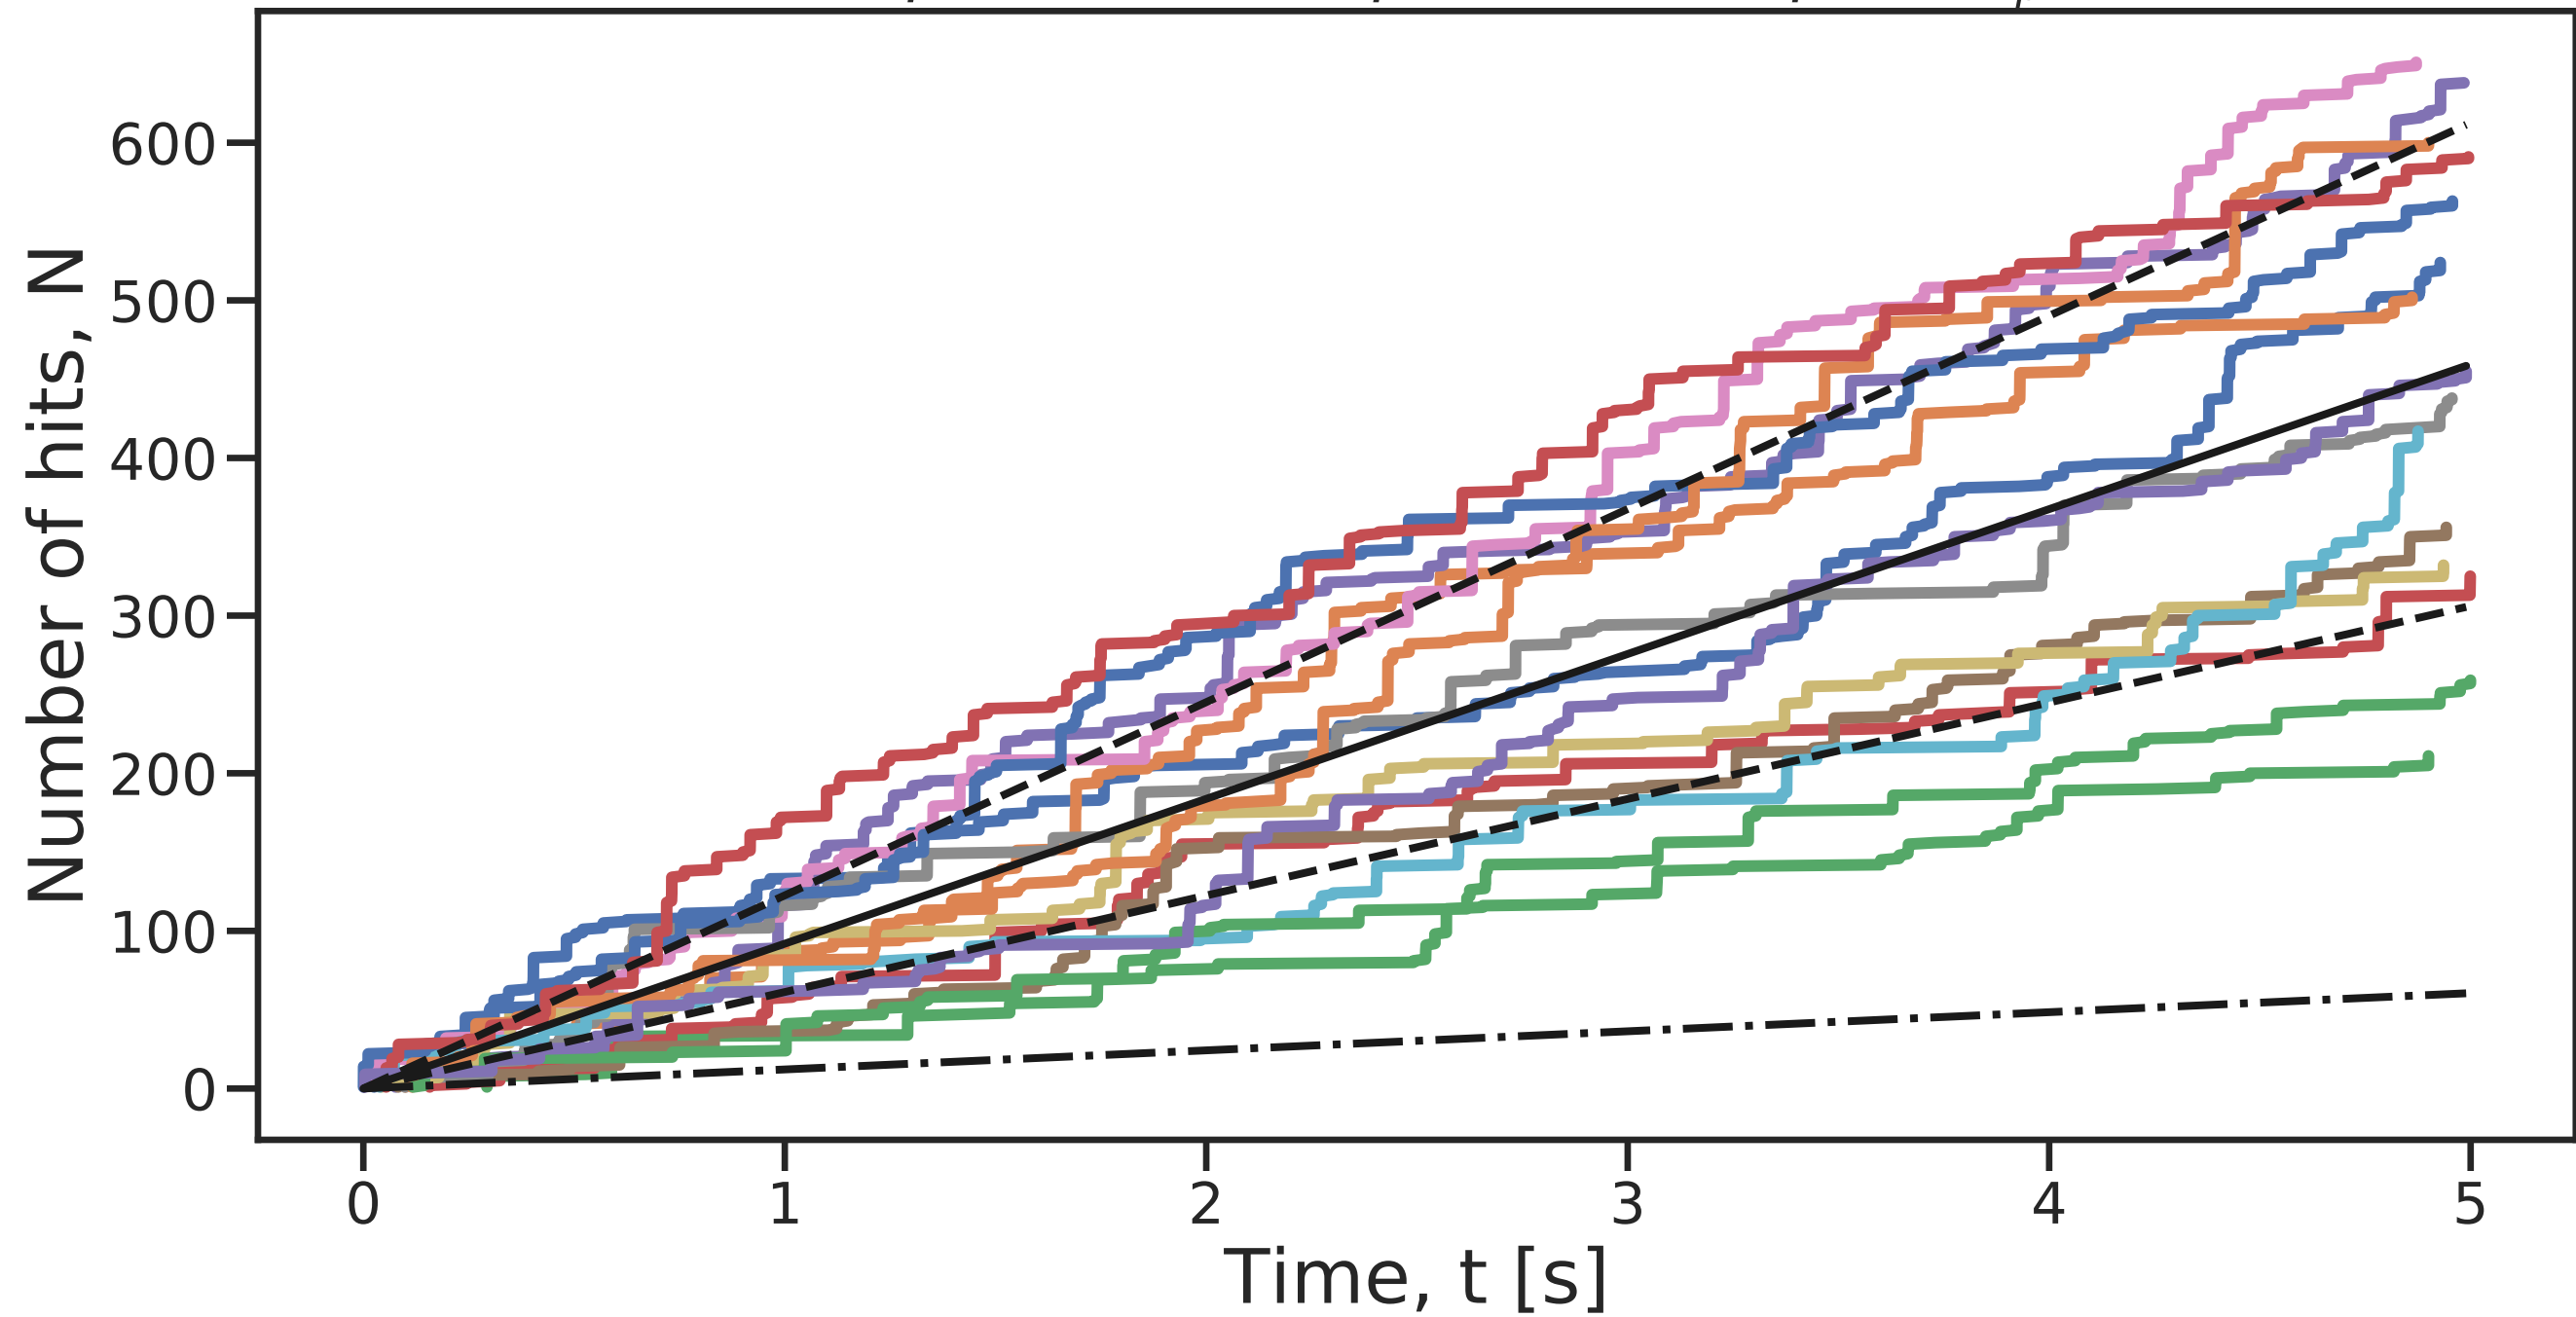

$c = 0.4 \text{ nM}$ ;  $D = 80 \text{ } \mu\text{m}^2/\text{s}$ ;  $R = 0.1 \text{ } \mu\text{m}$ ;  $\Delta t = 1.0 \text{ } \mu\text{s}$   $\langle N_{np} \rangle = 110.9 \pm 21.2$

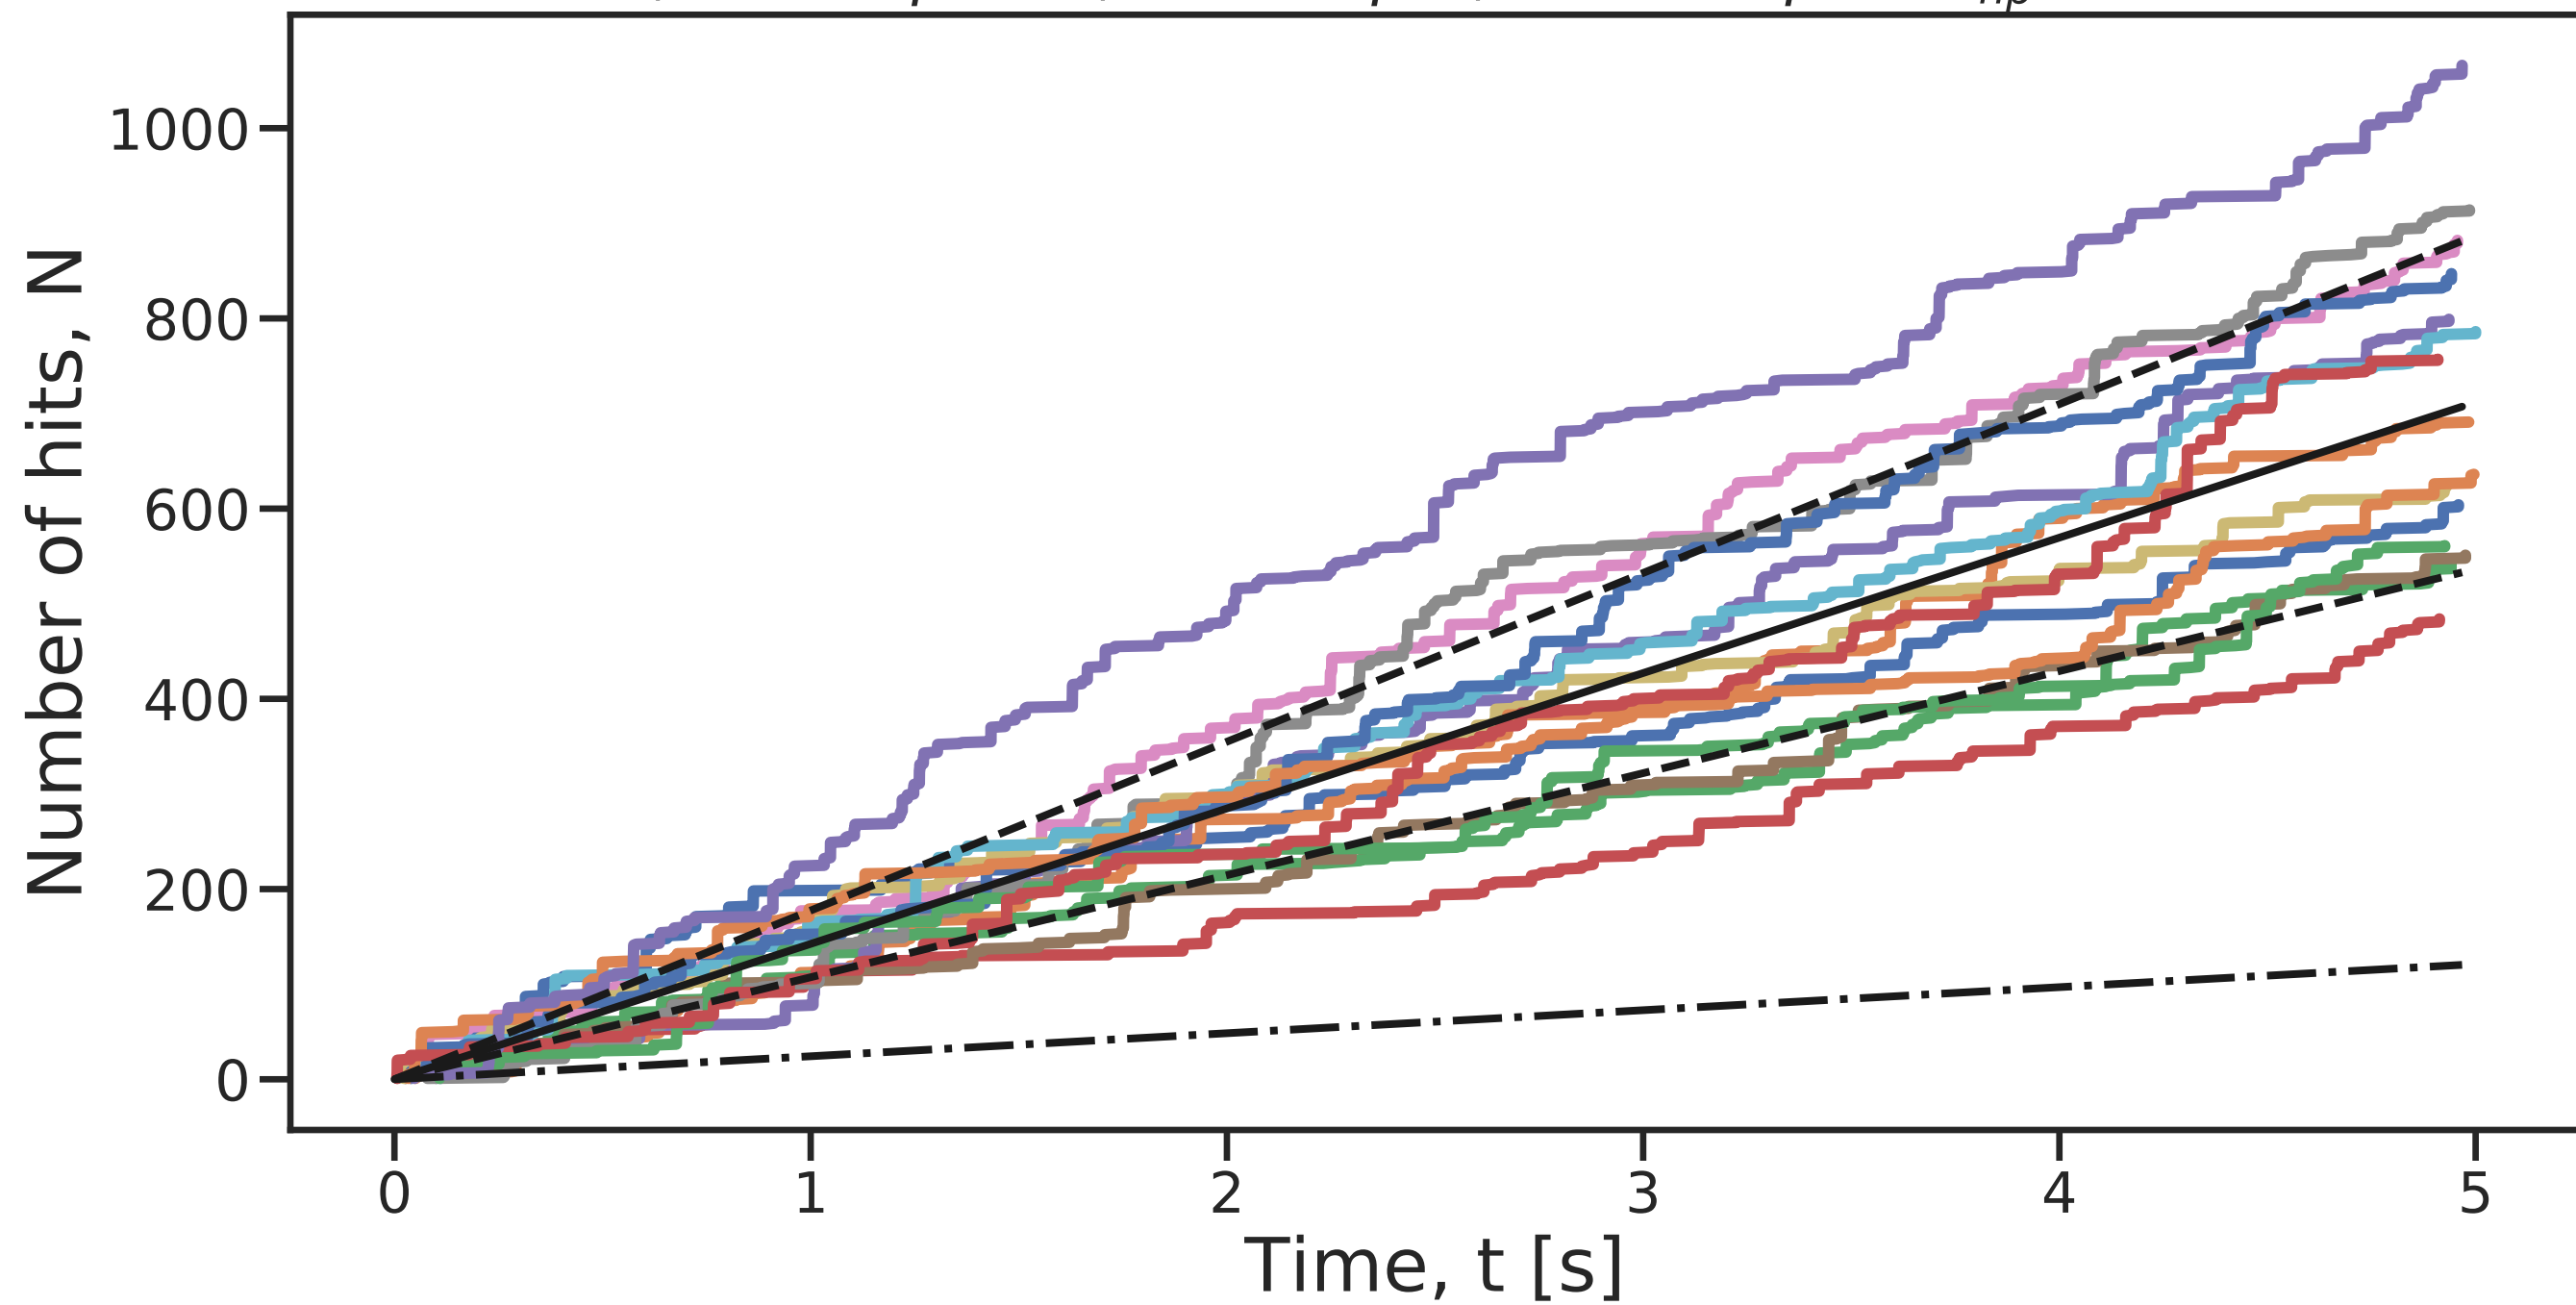

$c = 0.6 \text{ nM}; D = 80 \text{ } \mu\text{m}^2/\text{s}; R = 0.1 \text{ } \mu\text{m}; \Delta t = 1.0 \text{ } \mu\text{s} \langle N_{np} \rangle = 180.8 \pm 29.0$

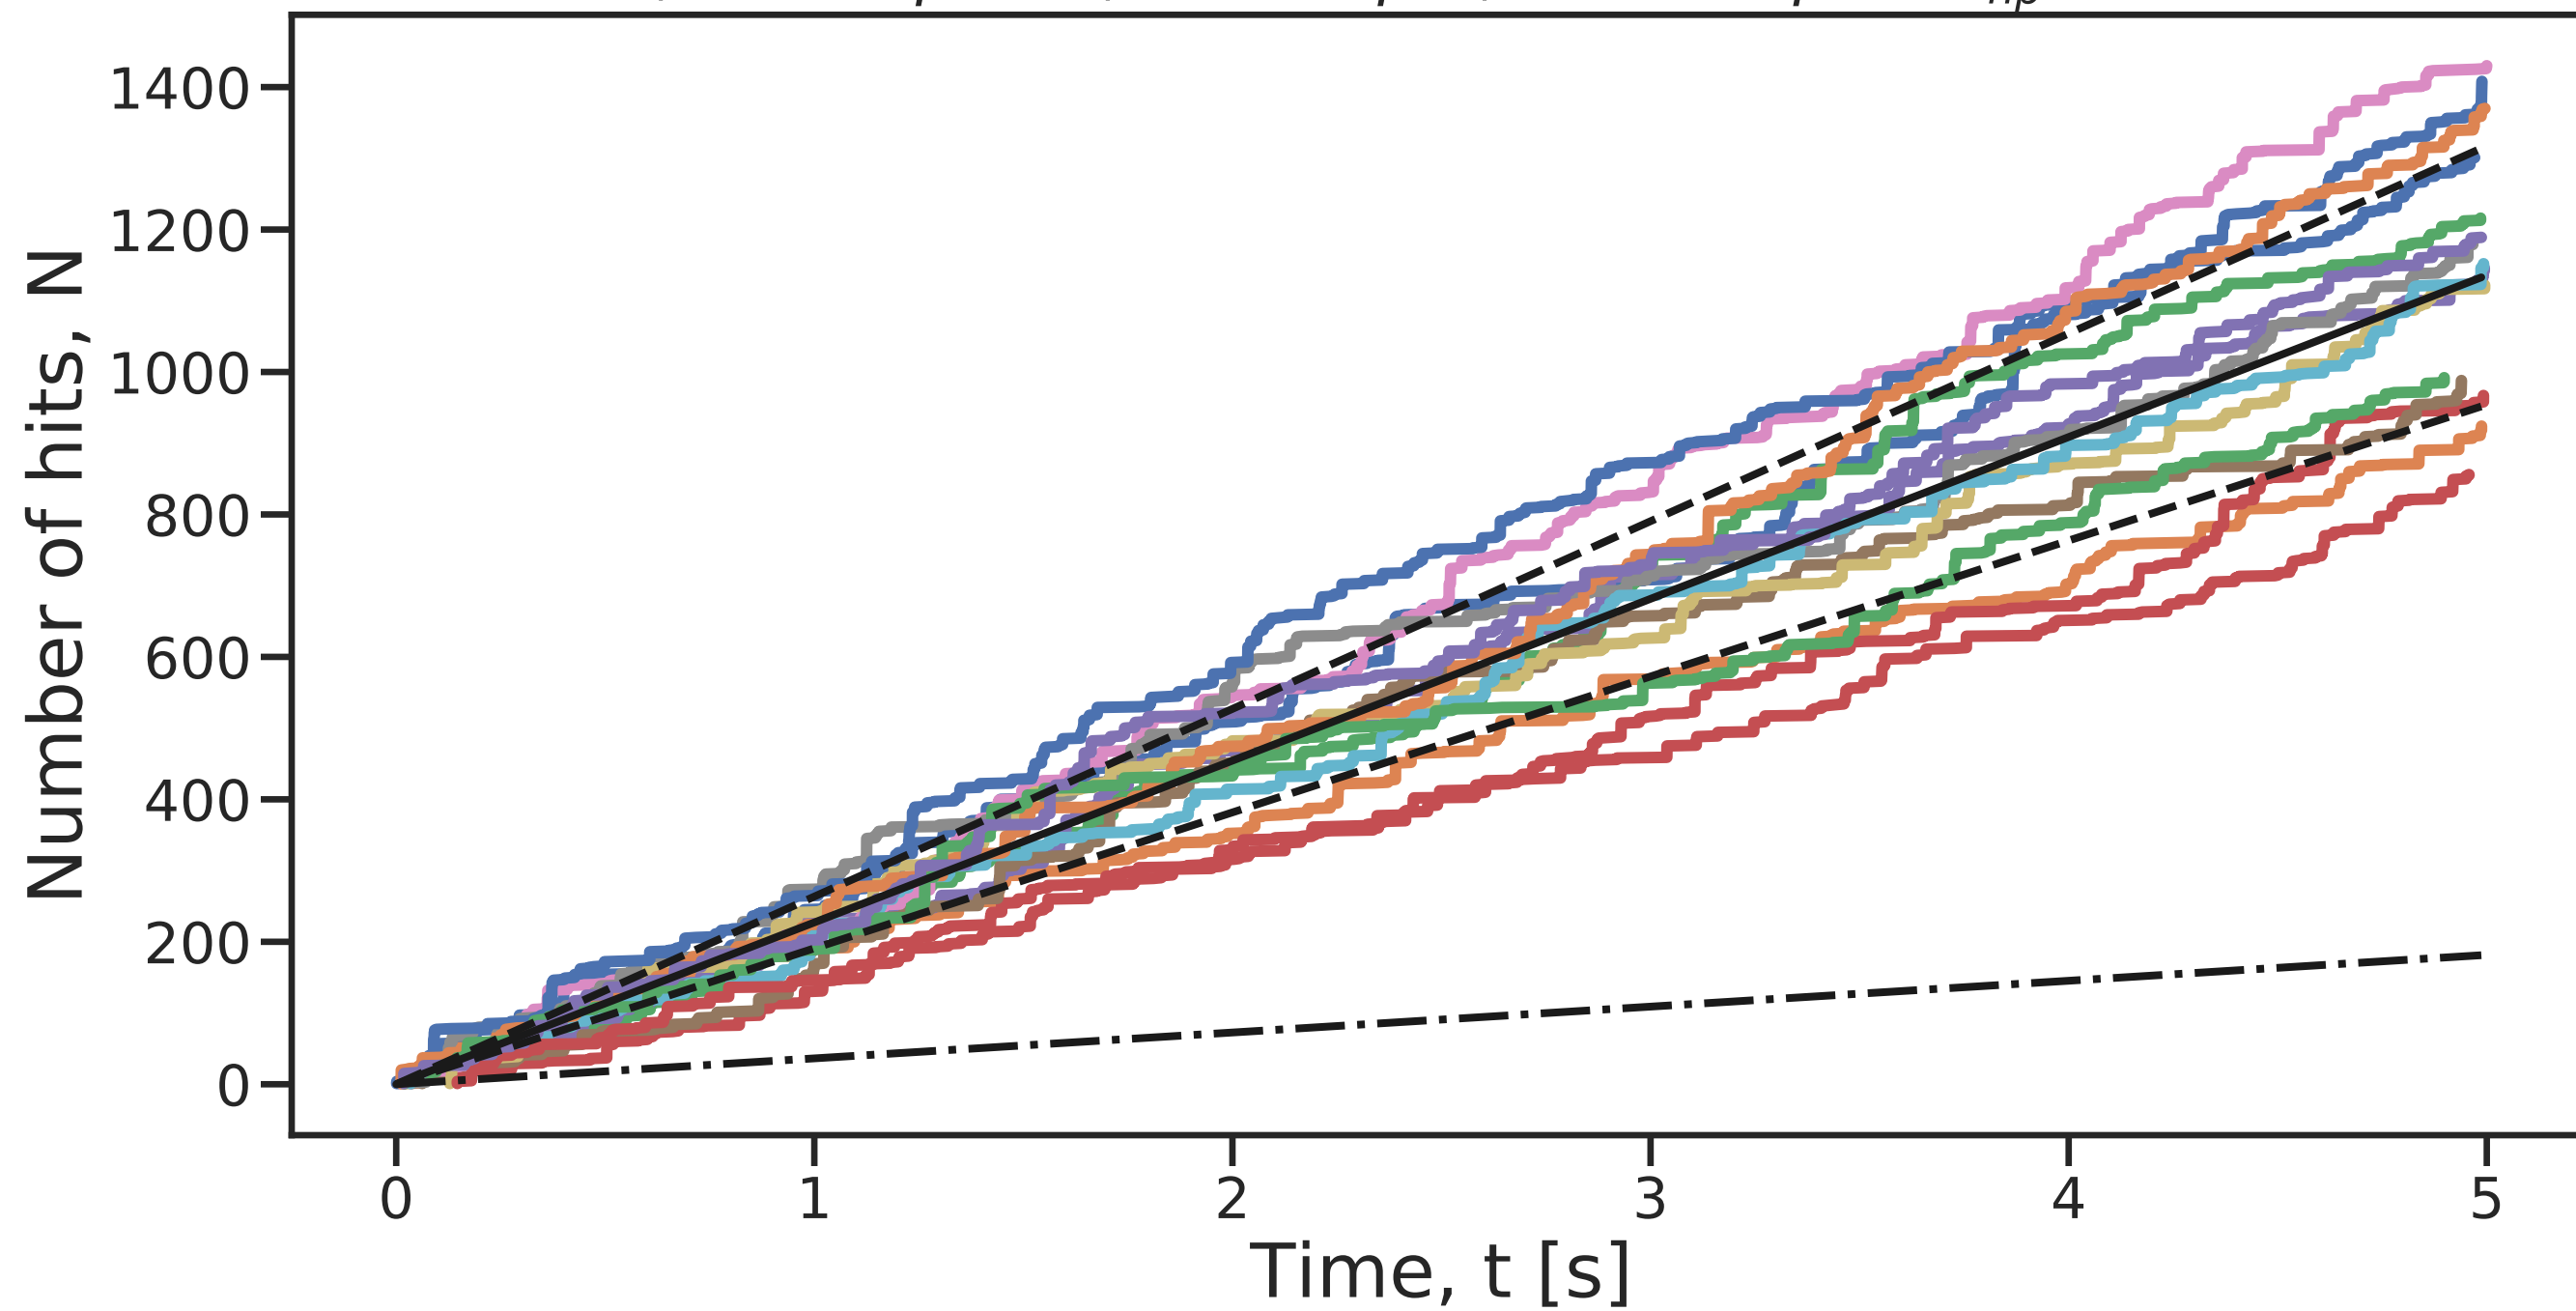

$c = 0.8 \text{ nM}; D = 80 \mu\text{m}^2/\text{s}; R = 0.1 \mu\text{m}; \Delta t = 1.0 \mu\text{s} \langle N_{np} \rangle = 238.3 \pm 42.3$

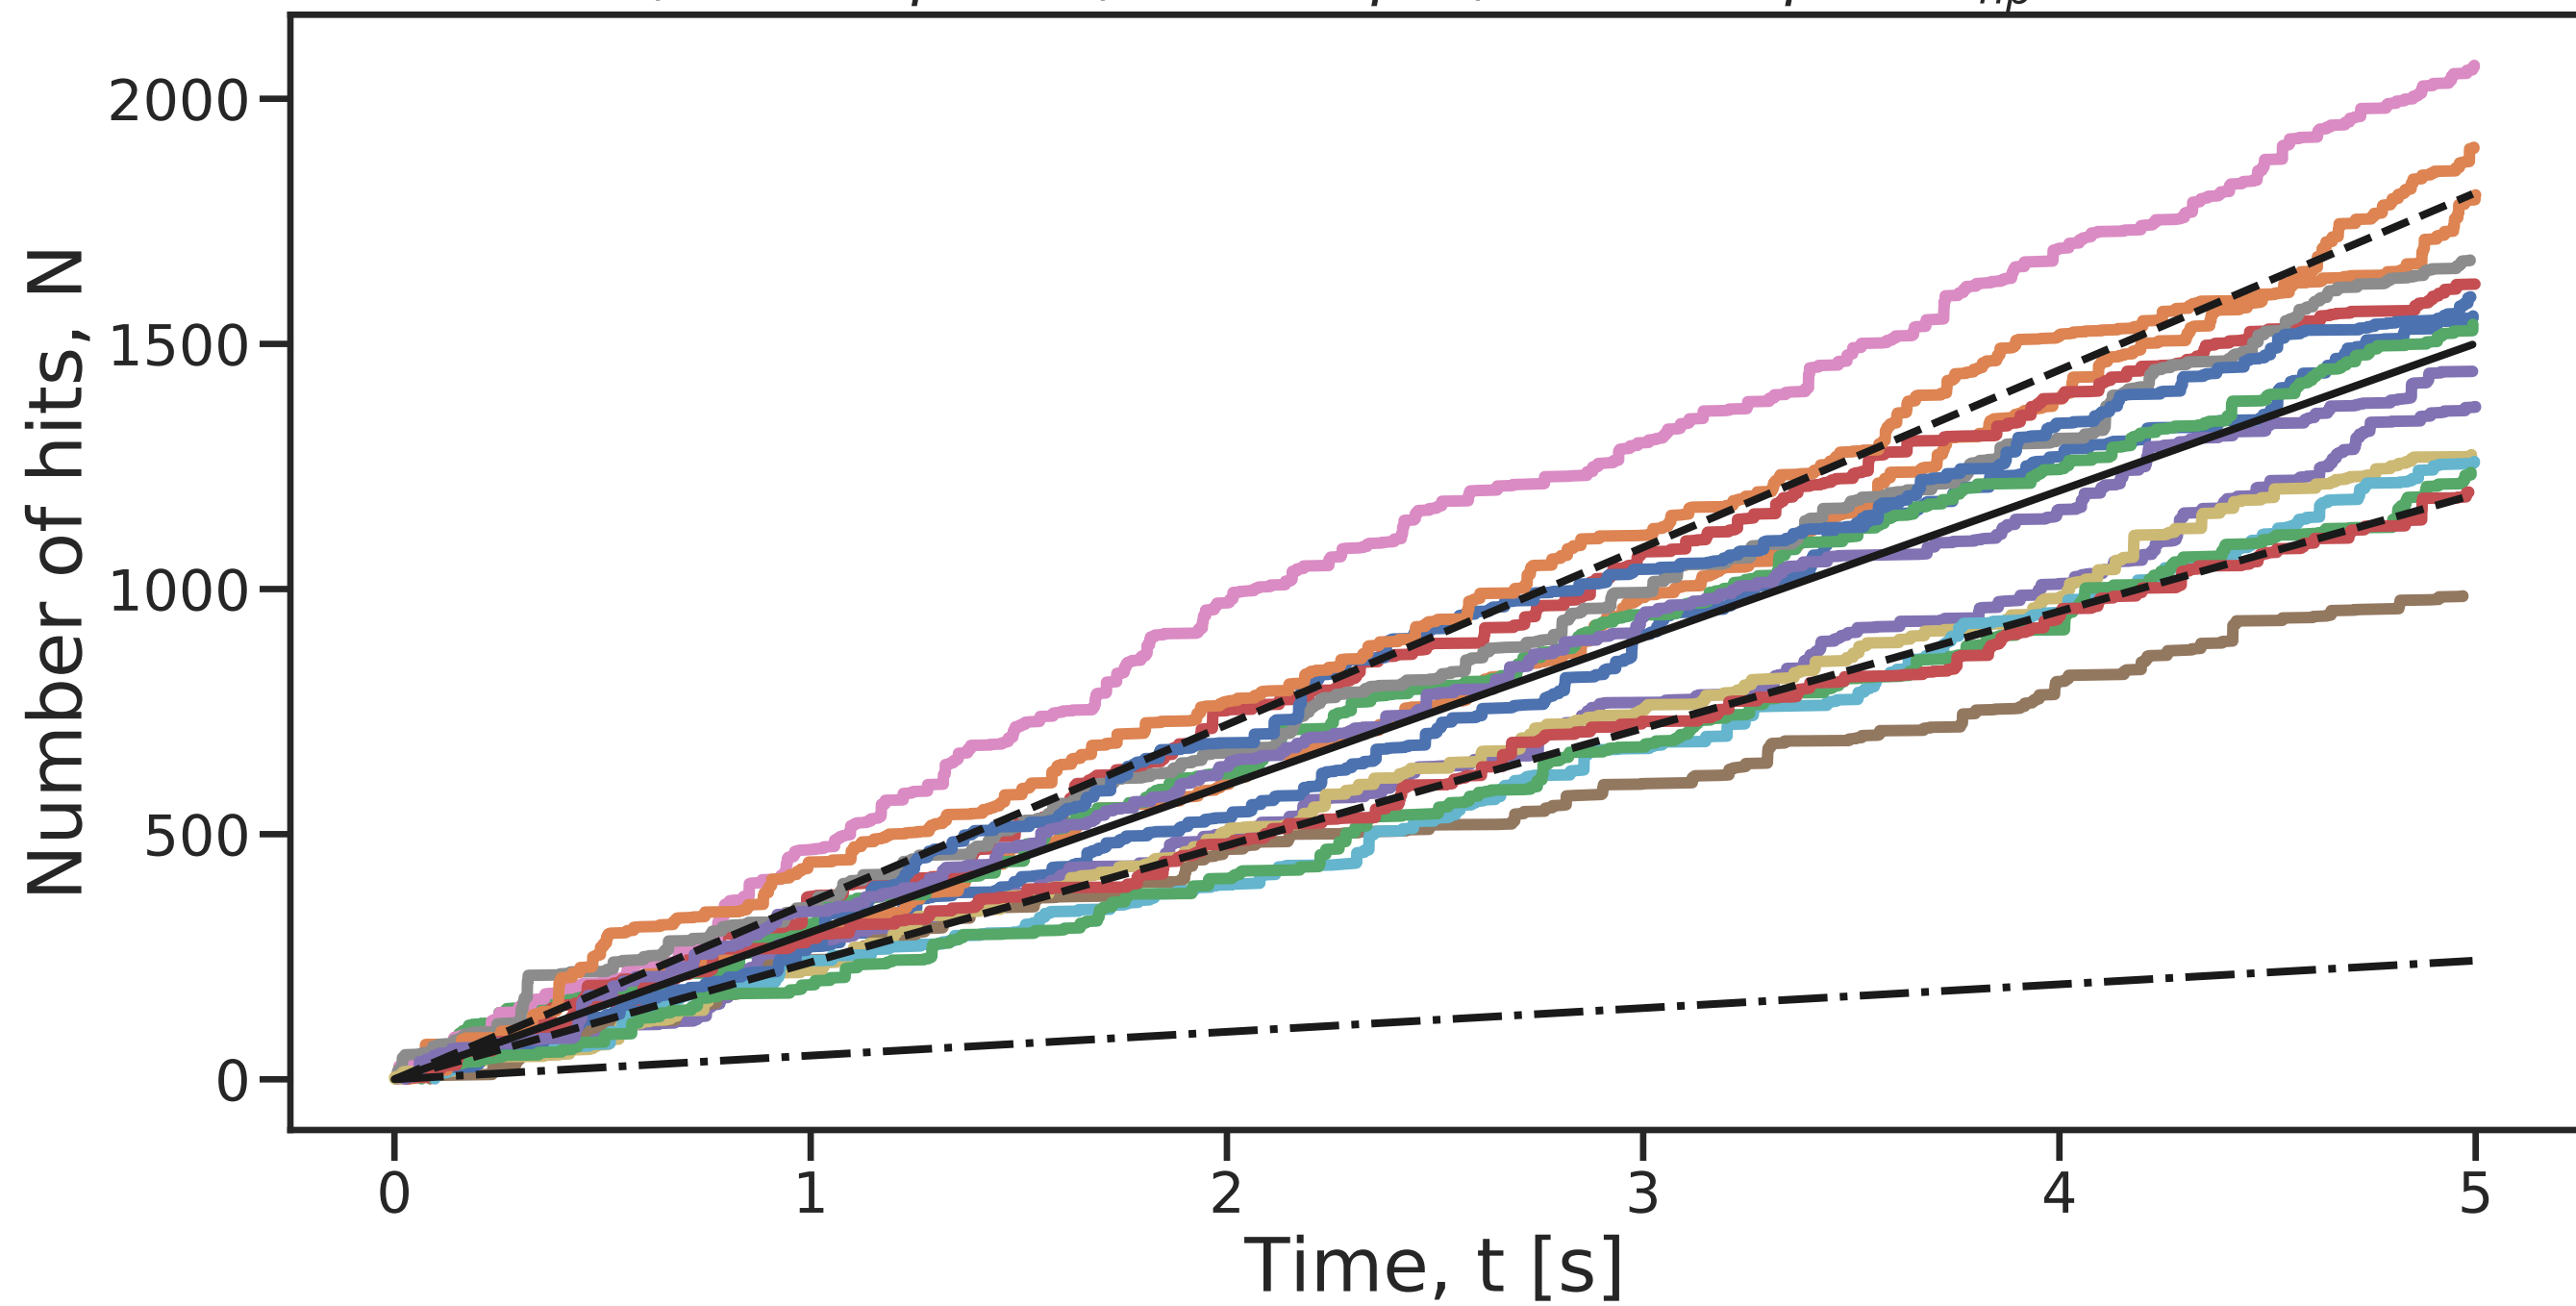

$c = 10.0 \text{ nM}; D = 80 \text{ } \mu\text{m}^2/\text{s}; R = 0.1 \text{ } \mu\text{m}; \Delta t = 1.0 \text{ } \mu\text{s} \langle N_{np} \rangle = 3011.9 \pm 203.4$

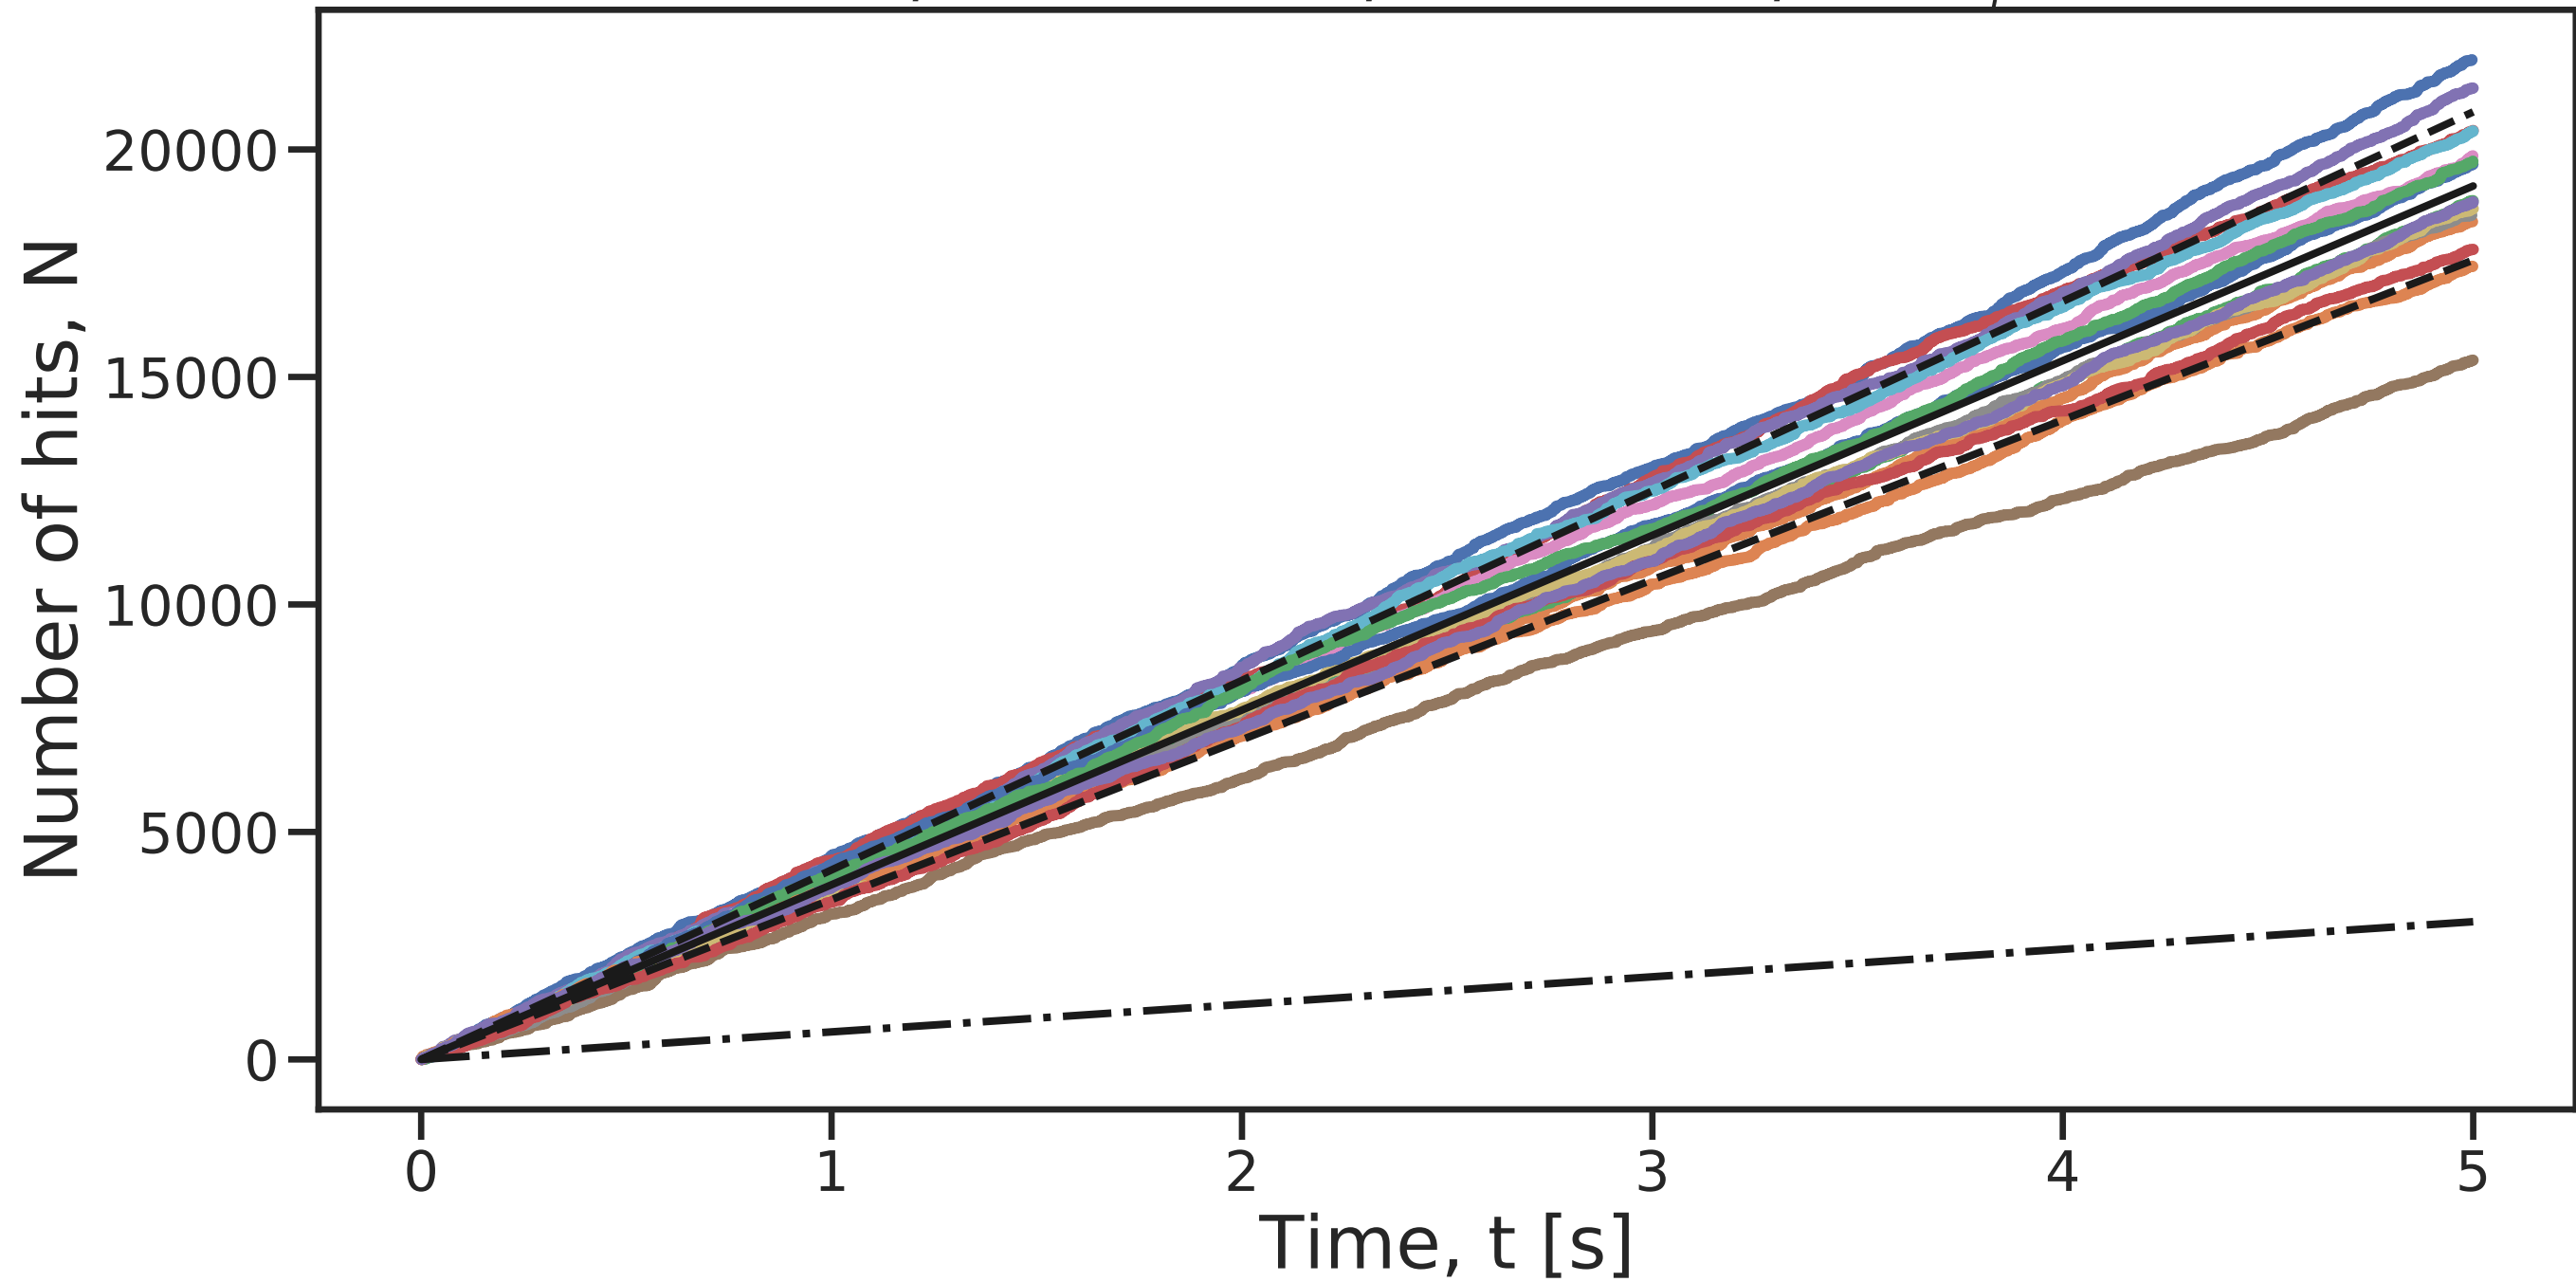

$c = 1.0 \text{ nM}$ ;  $D = 10 \mu\text{m}^2/\text{s}$ ;  $R = 0.1 \mu\text{m}$ ;  $\Delta t = 1.0 \mu\text{s}$   $\langle N_{np} \rangle = 39.8 \pm 7.7$

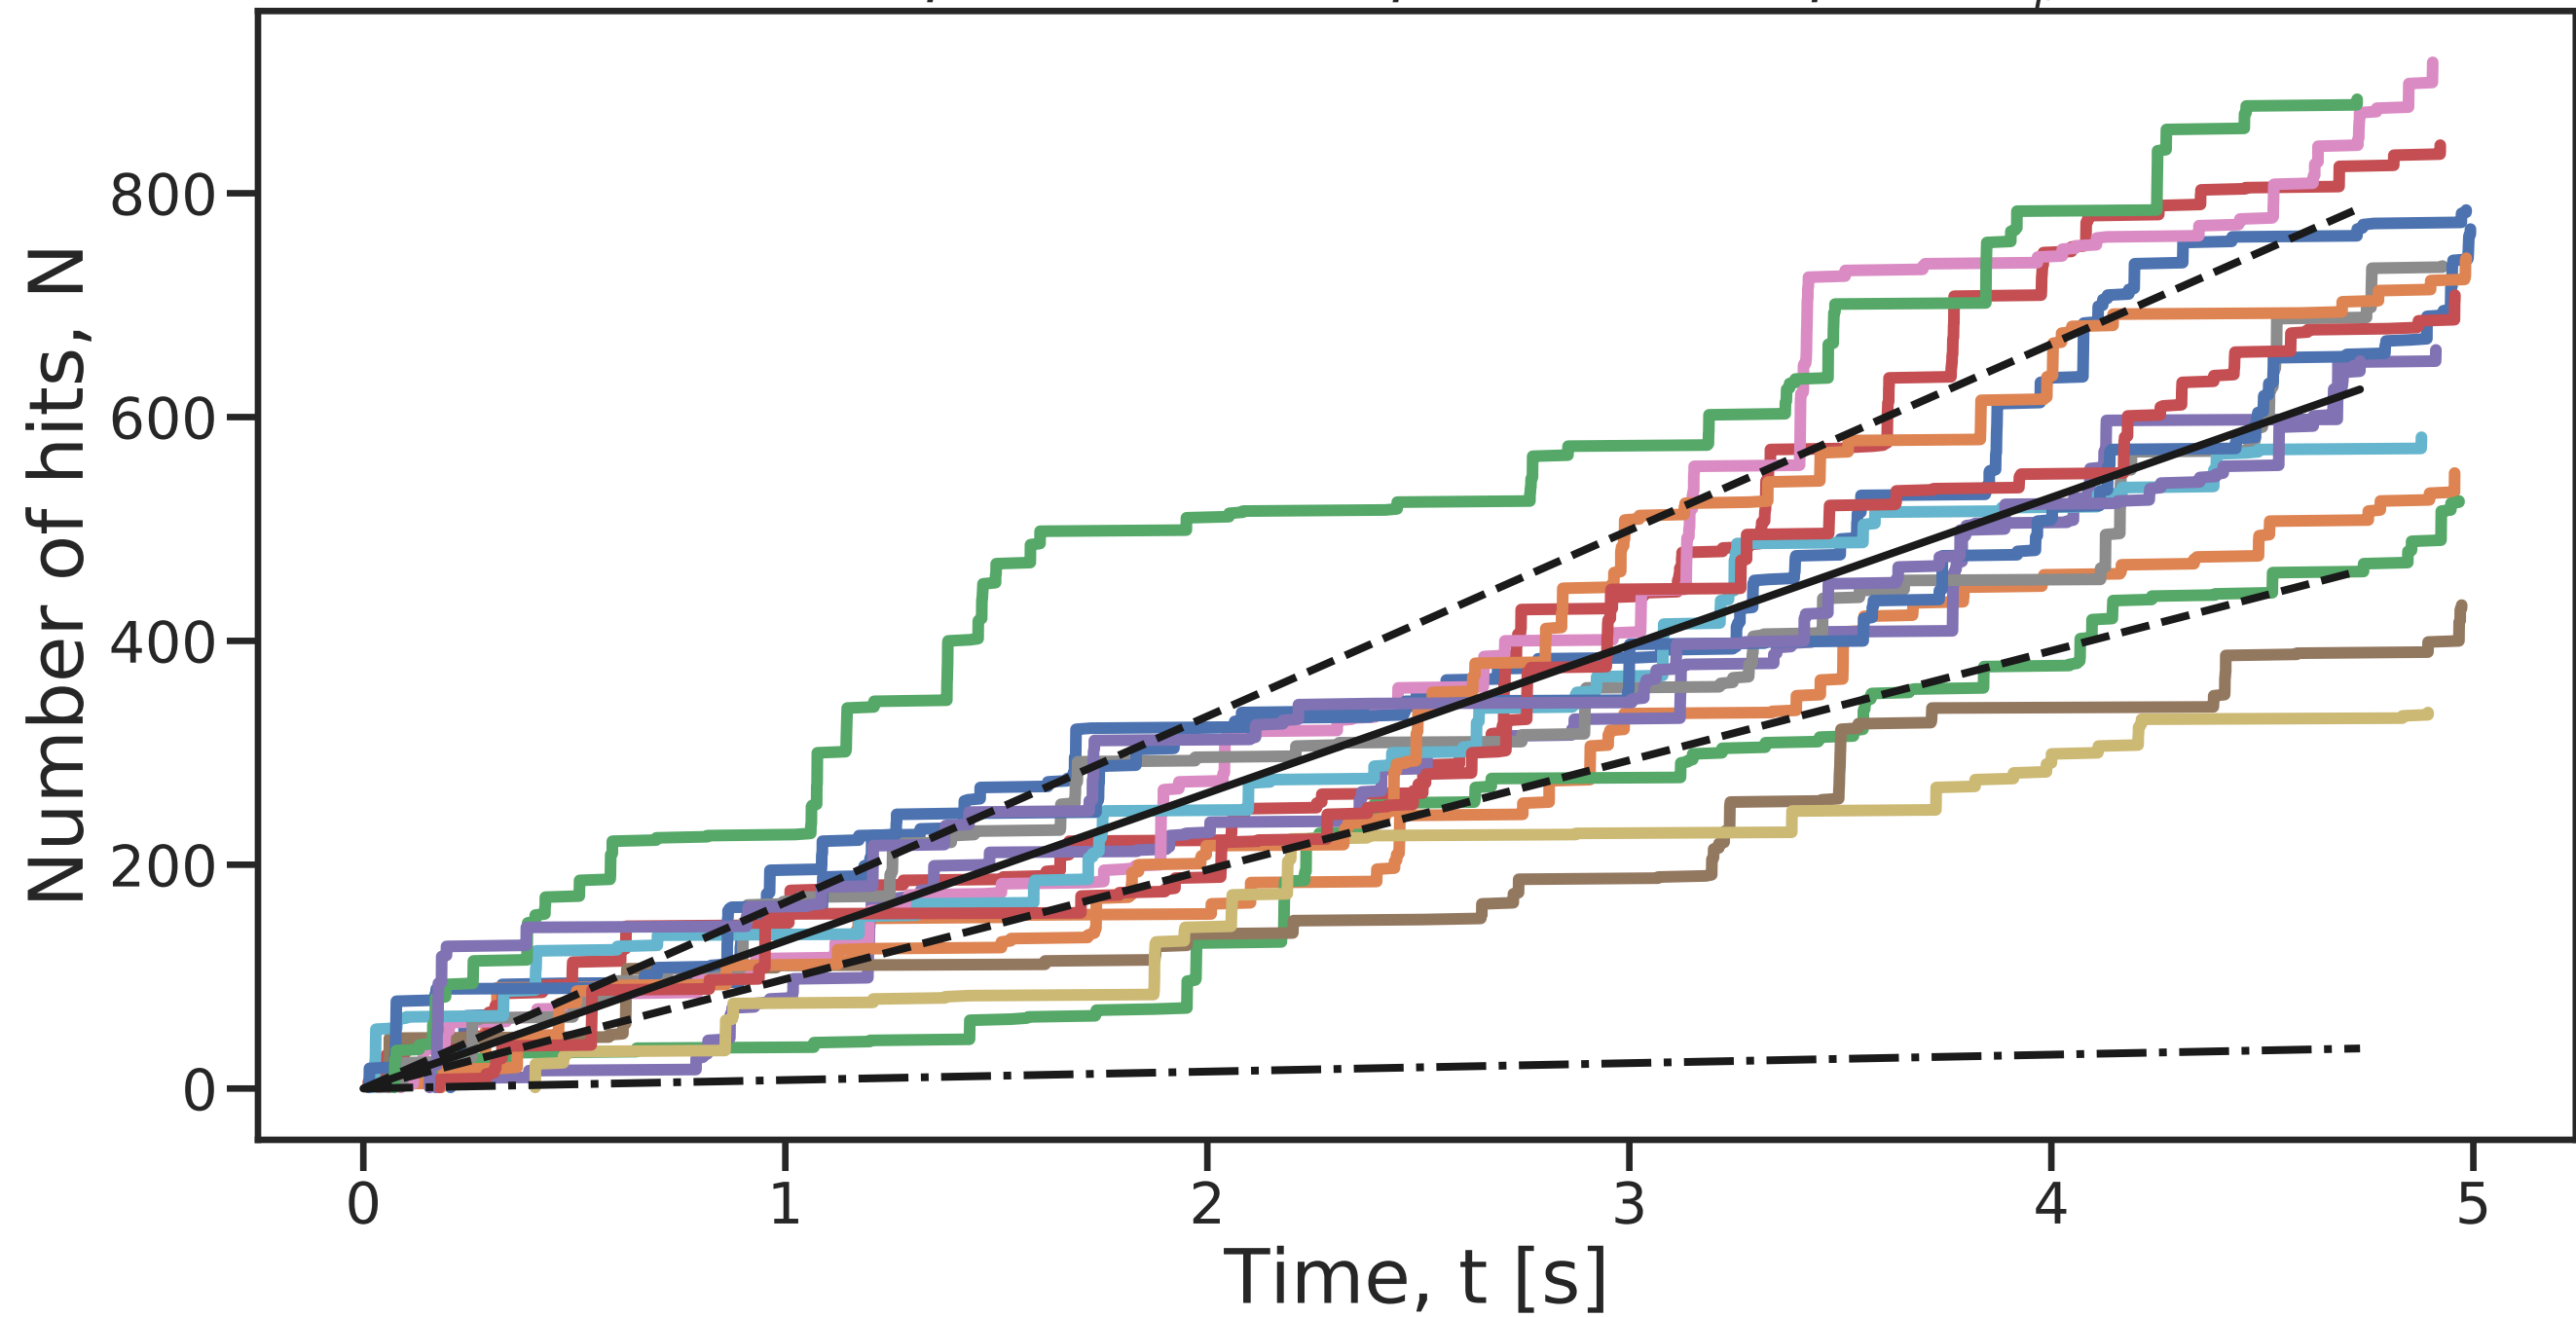

$c = 1.0 \text{ nM}; D = 160 \text{ } \mu\text{m}^2/\text{s}; R = 0.1 \text{ } \mu\text{m}; \Delta t = 1.0 \text{ } \mu\text{s} \langle N_{np} \rangle = 572.8 \pm 87.8$

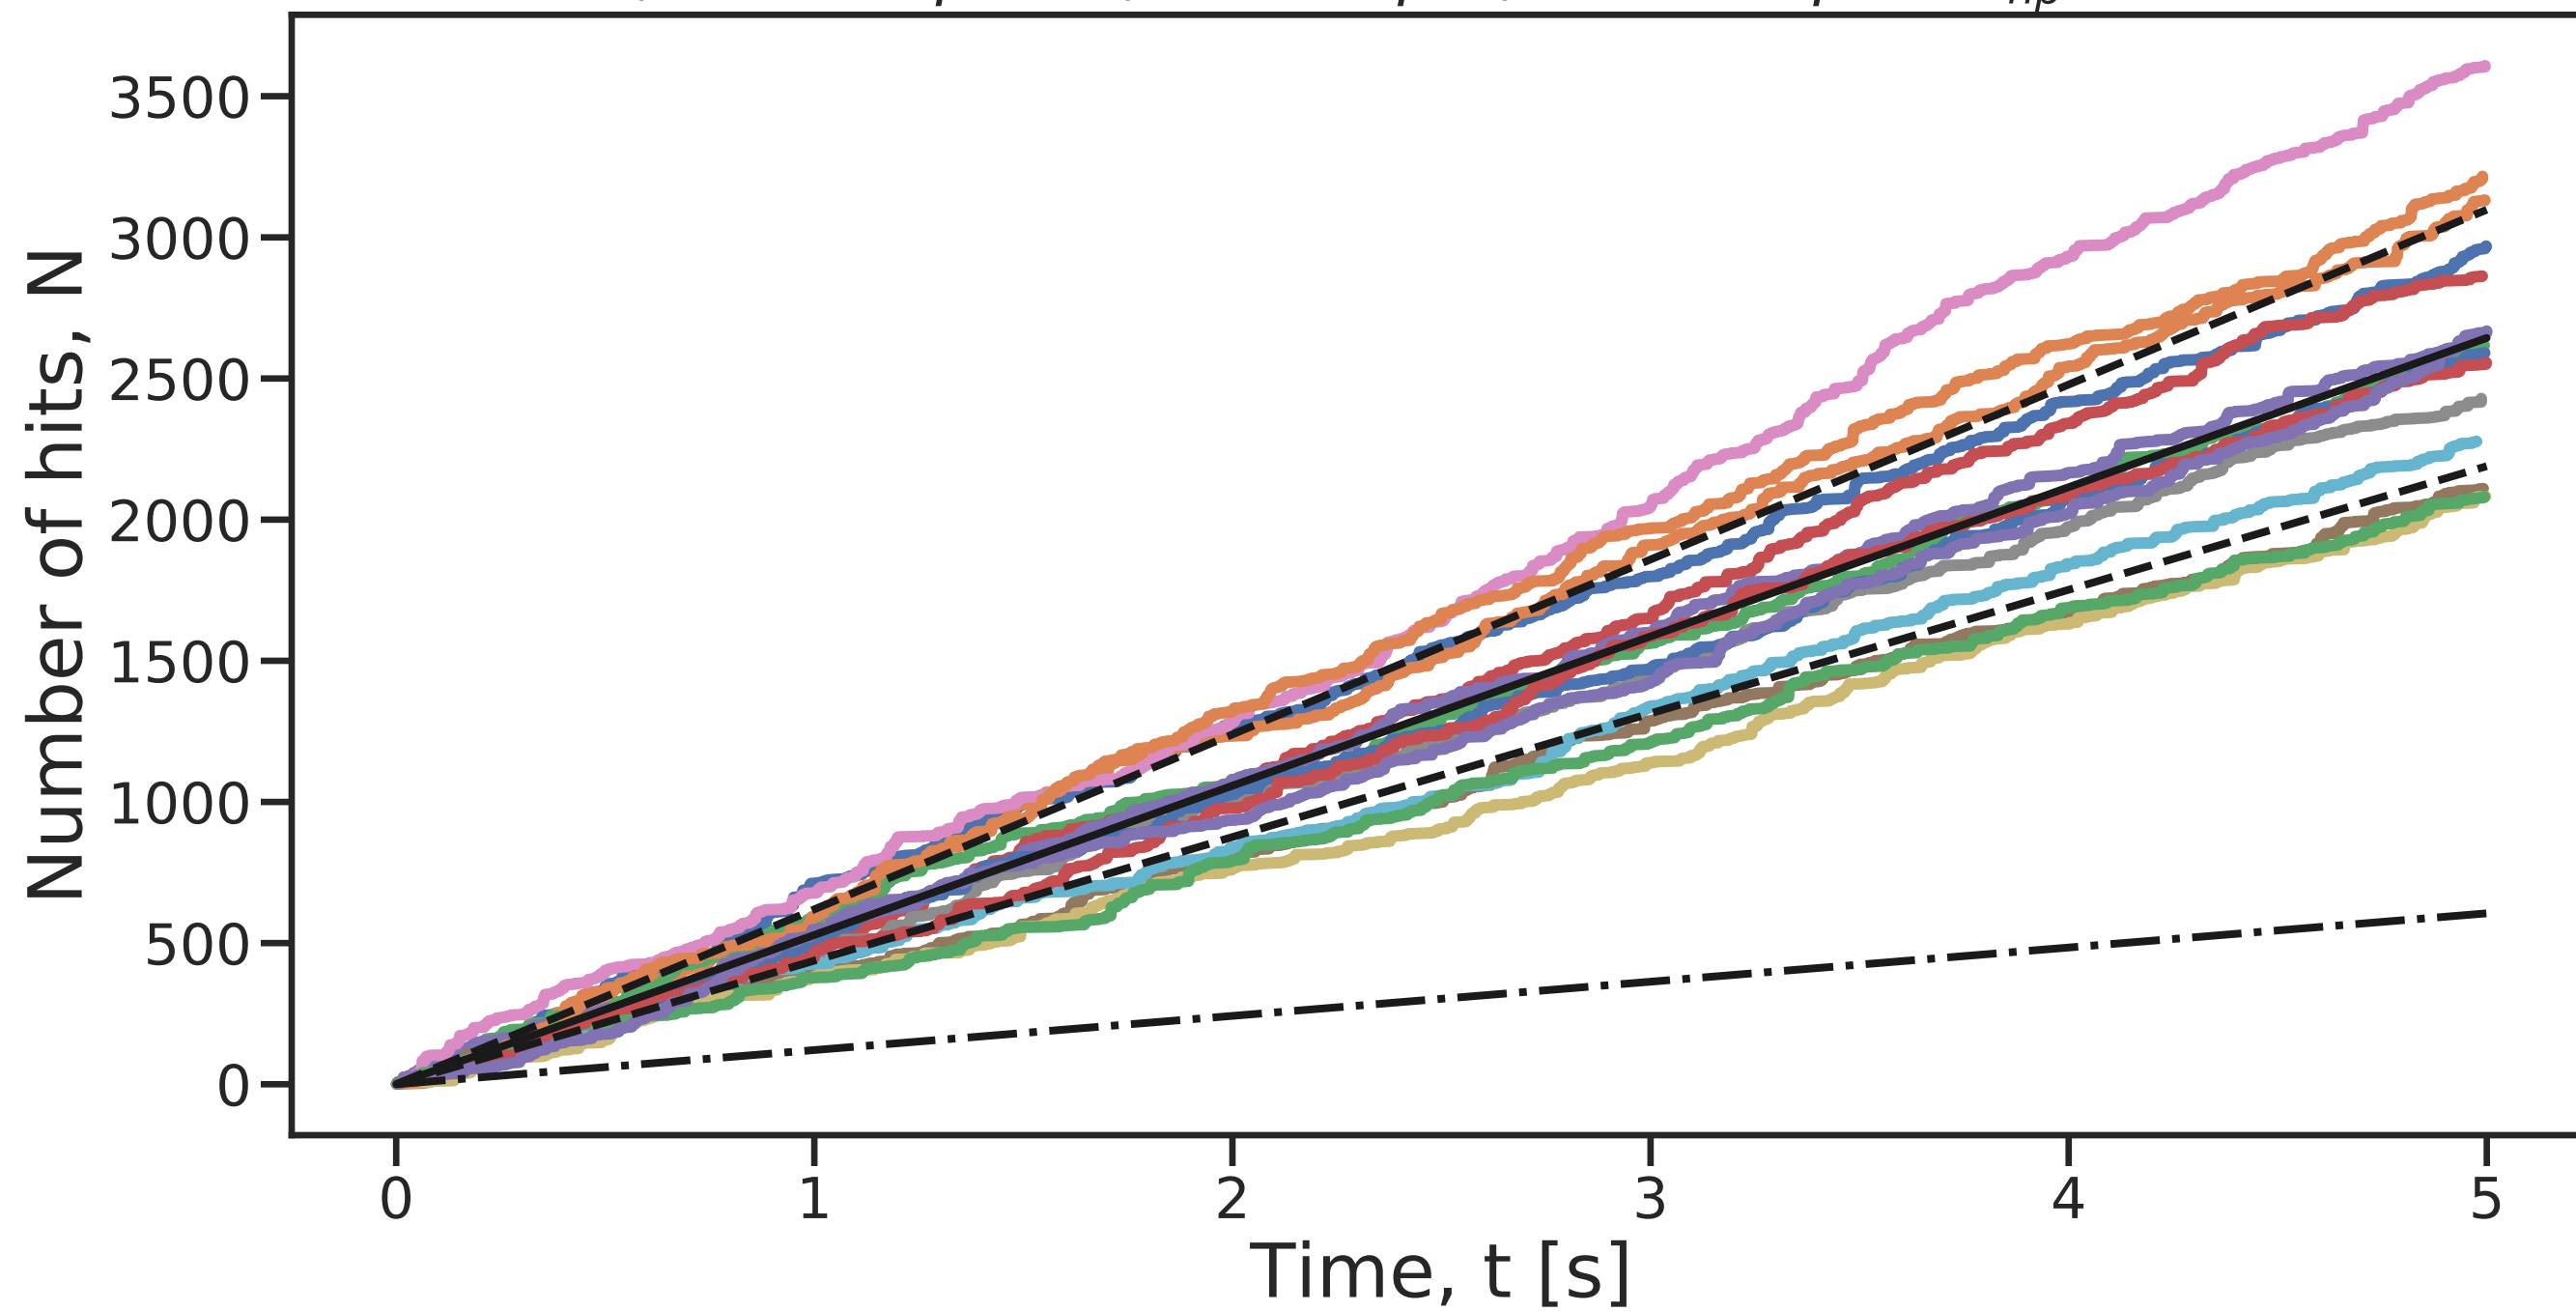



$c = 1.0 \text{ nM}$ ;  $D = 20 \text{ } \mu\text{m}^2/\text{s}$ ;  $R = 0.1 \text{ } \mu\text{m}$ ;  $\Delta t = 0.01 \text{ } \mu\text{s}$   $\langle N_{np} \rangle = 76.5 \pm 13.2$

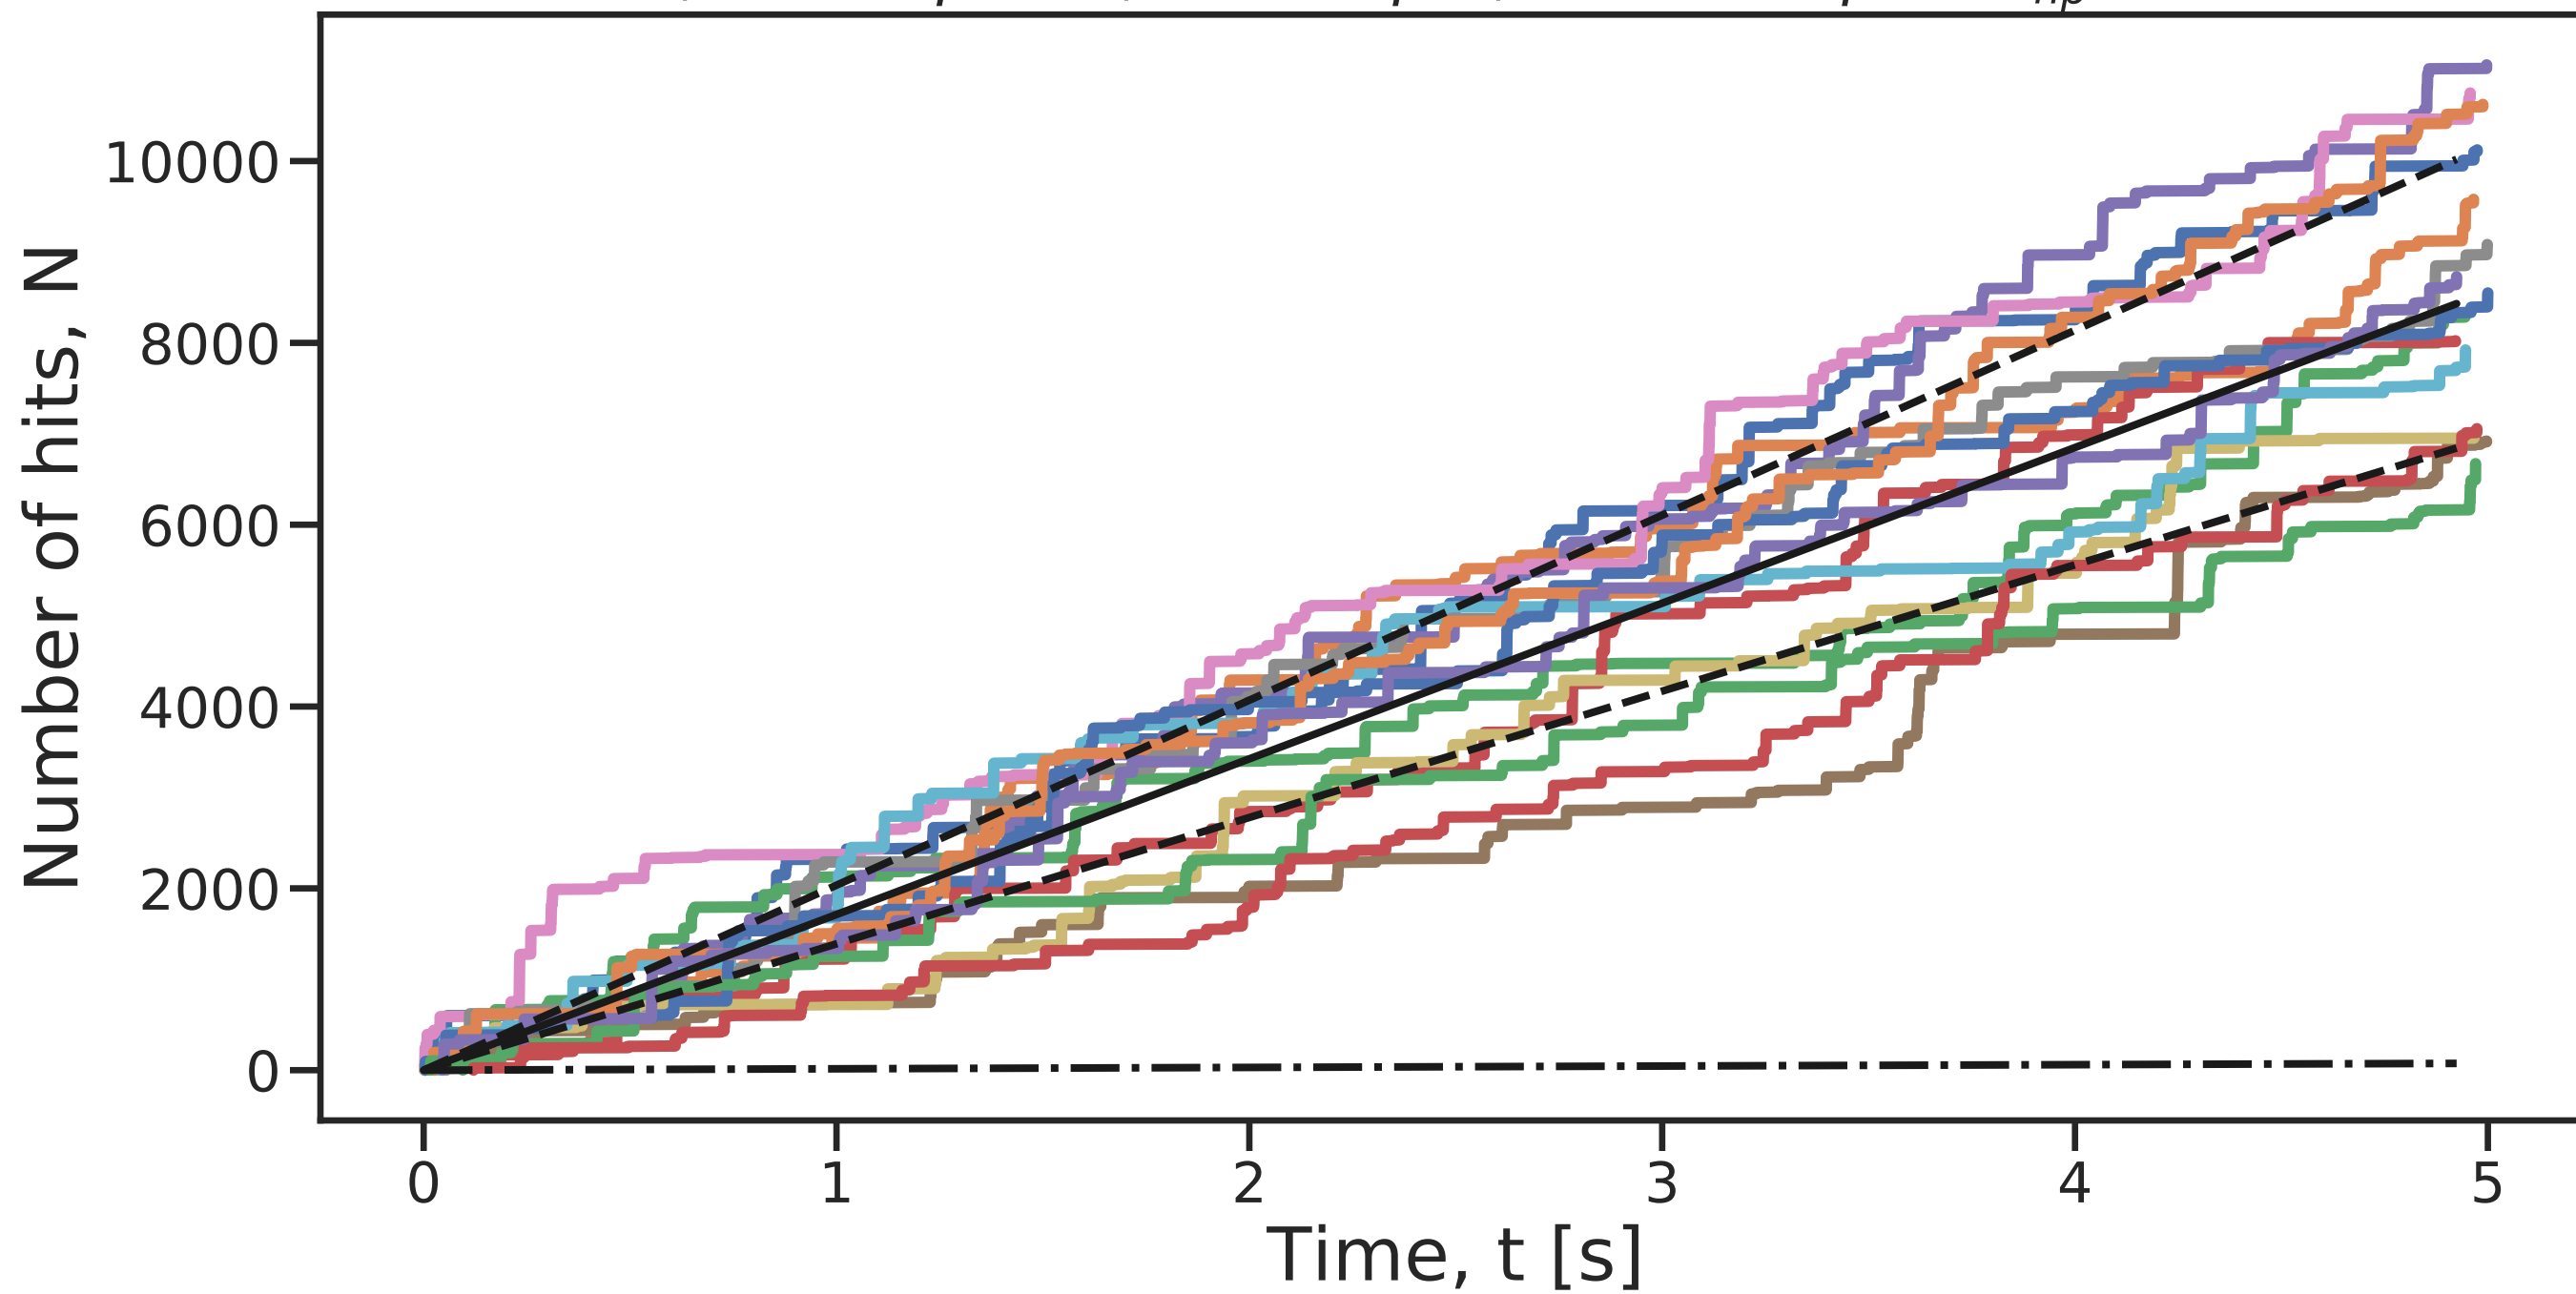

$c = 1.0 \text{ nM}; D = 20 \mu\text{m}^2/\text{s}; R = 0.1 \mu\text{m}; \Delta t = 0.02 \mu\text{s} \langle N_{np} \rangle = 80.5 \pm 17.3$

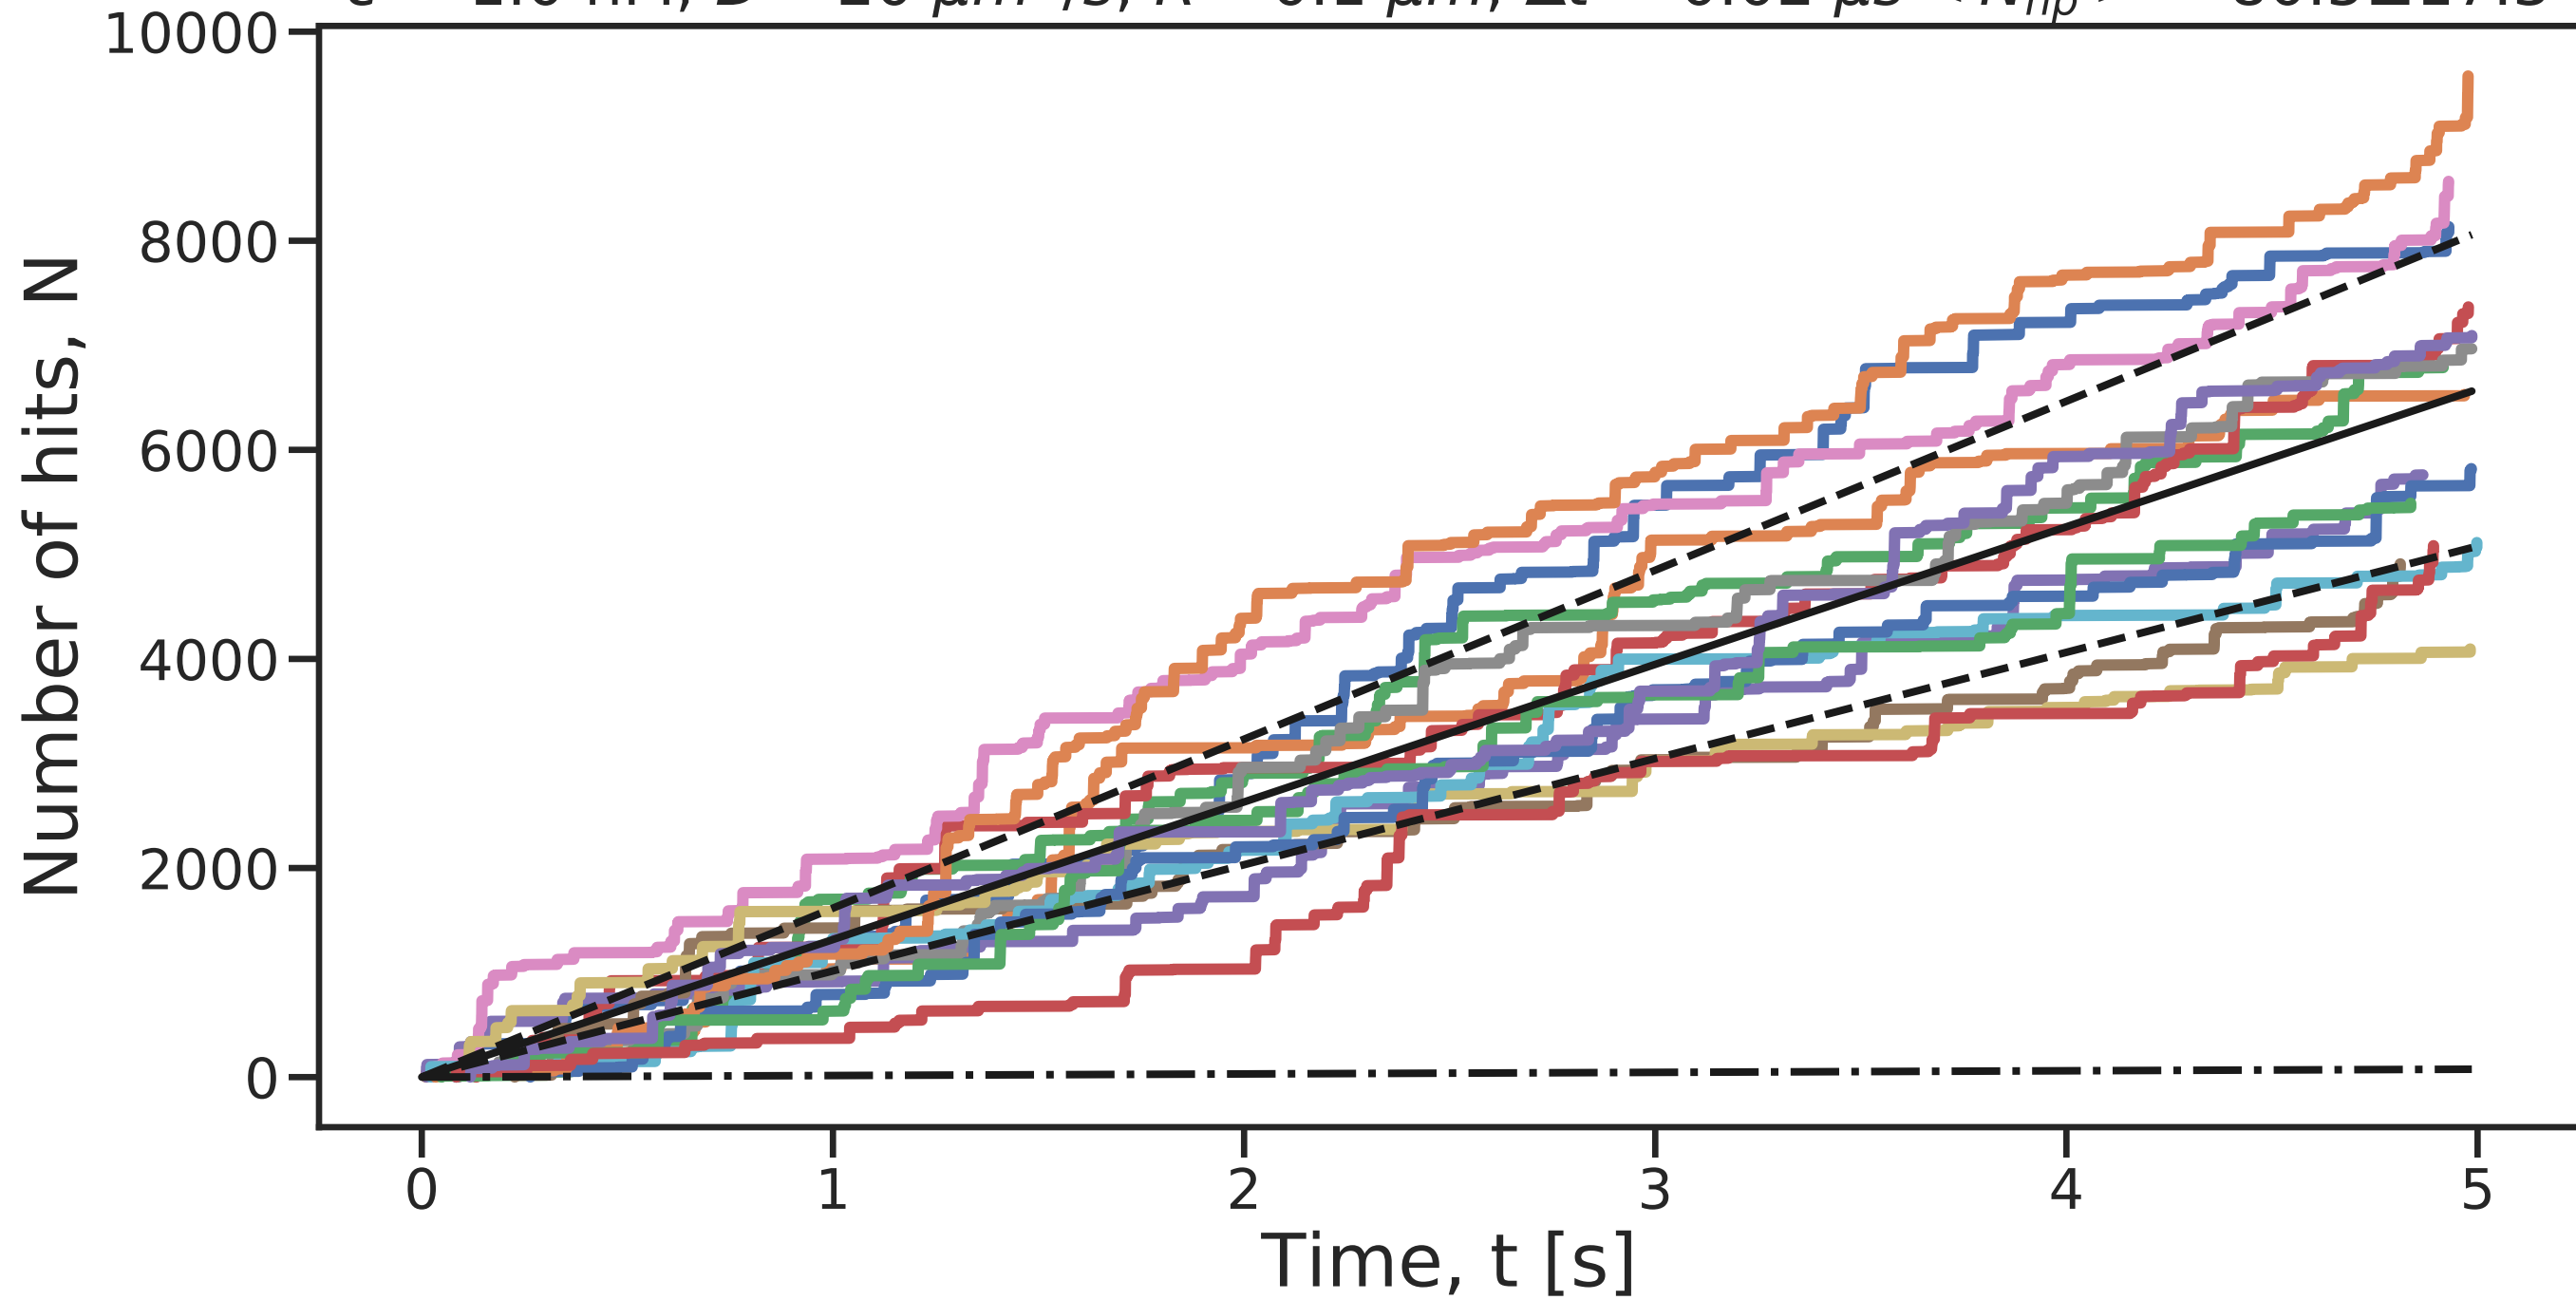

$c = 1.0 \text{ nM}; D = 20 \text{ } \mu\text{m}^2/\text{s}; R = 0.1 \text{ } \mu\text{m}; \Delta t = 0.04 \text{ } \mu\text{s} \langle N_{np} \rangle = 78.9 \pm 13.5$

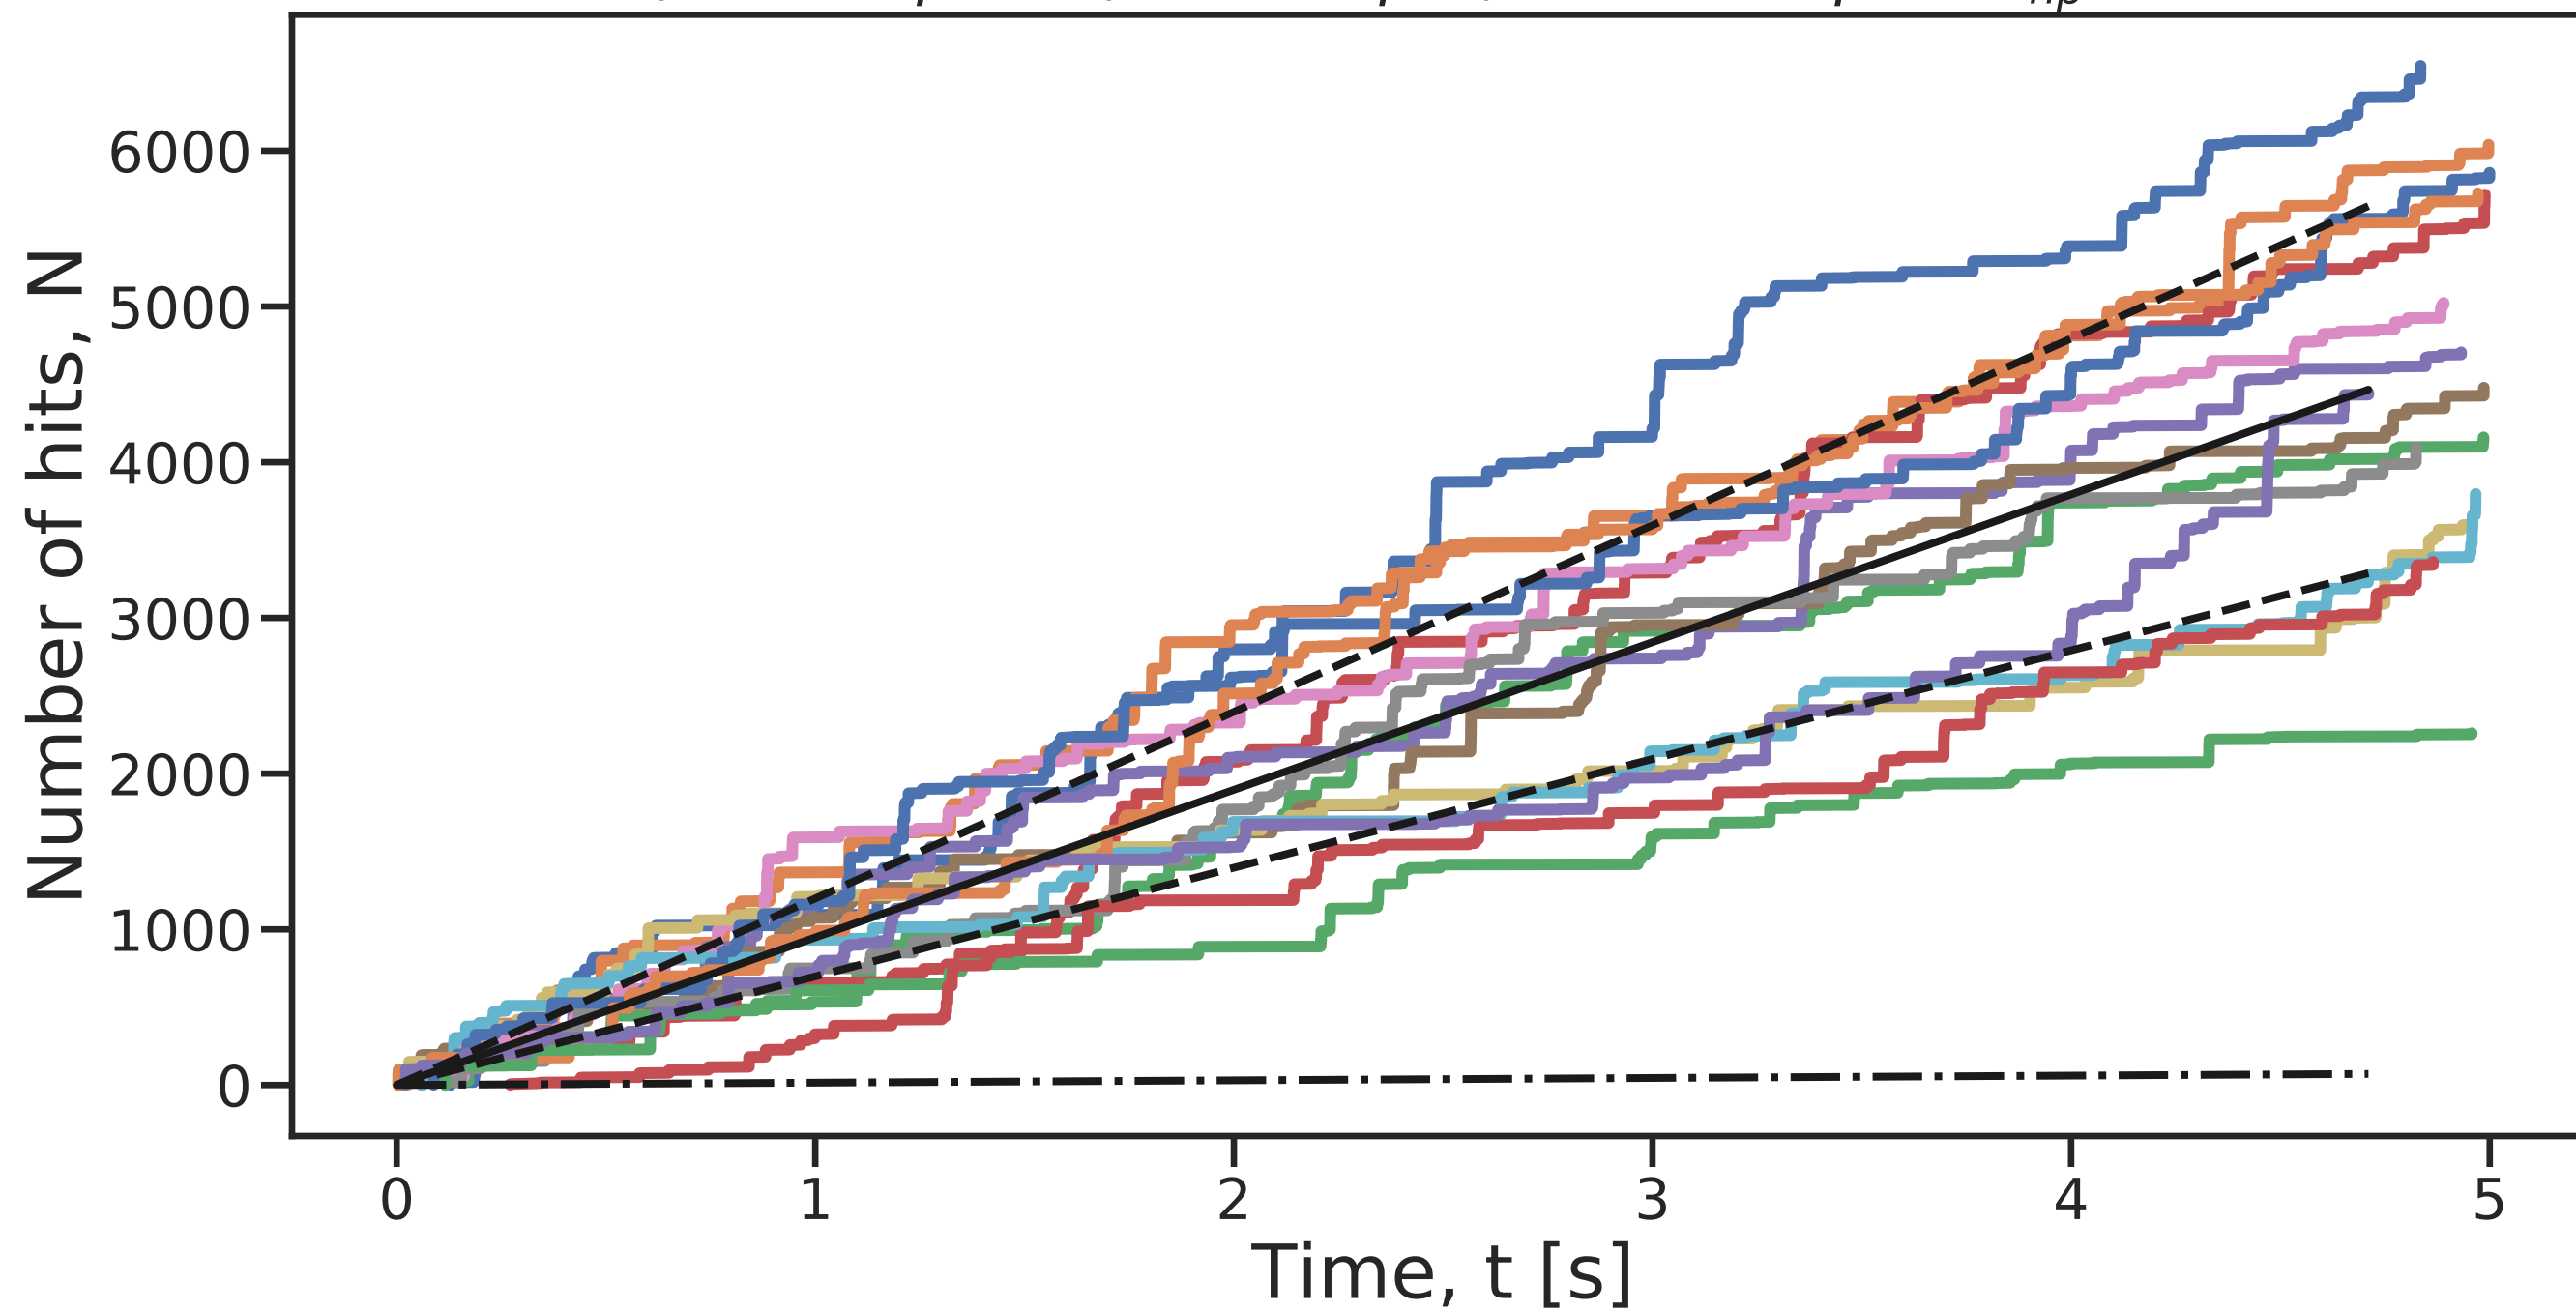

$c = 1.0 \text{ nM}; D = 20 \text{ } \mu\text{m}^2/\text{s}; R = 0.1 \text{ } \mu\text{m}; \Delta t = 0.06 \text{ } \mu\text{s} < N_{np} > = 81.9 \pm 13.2$

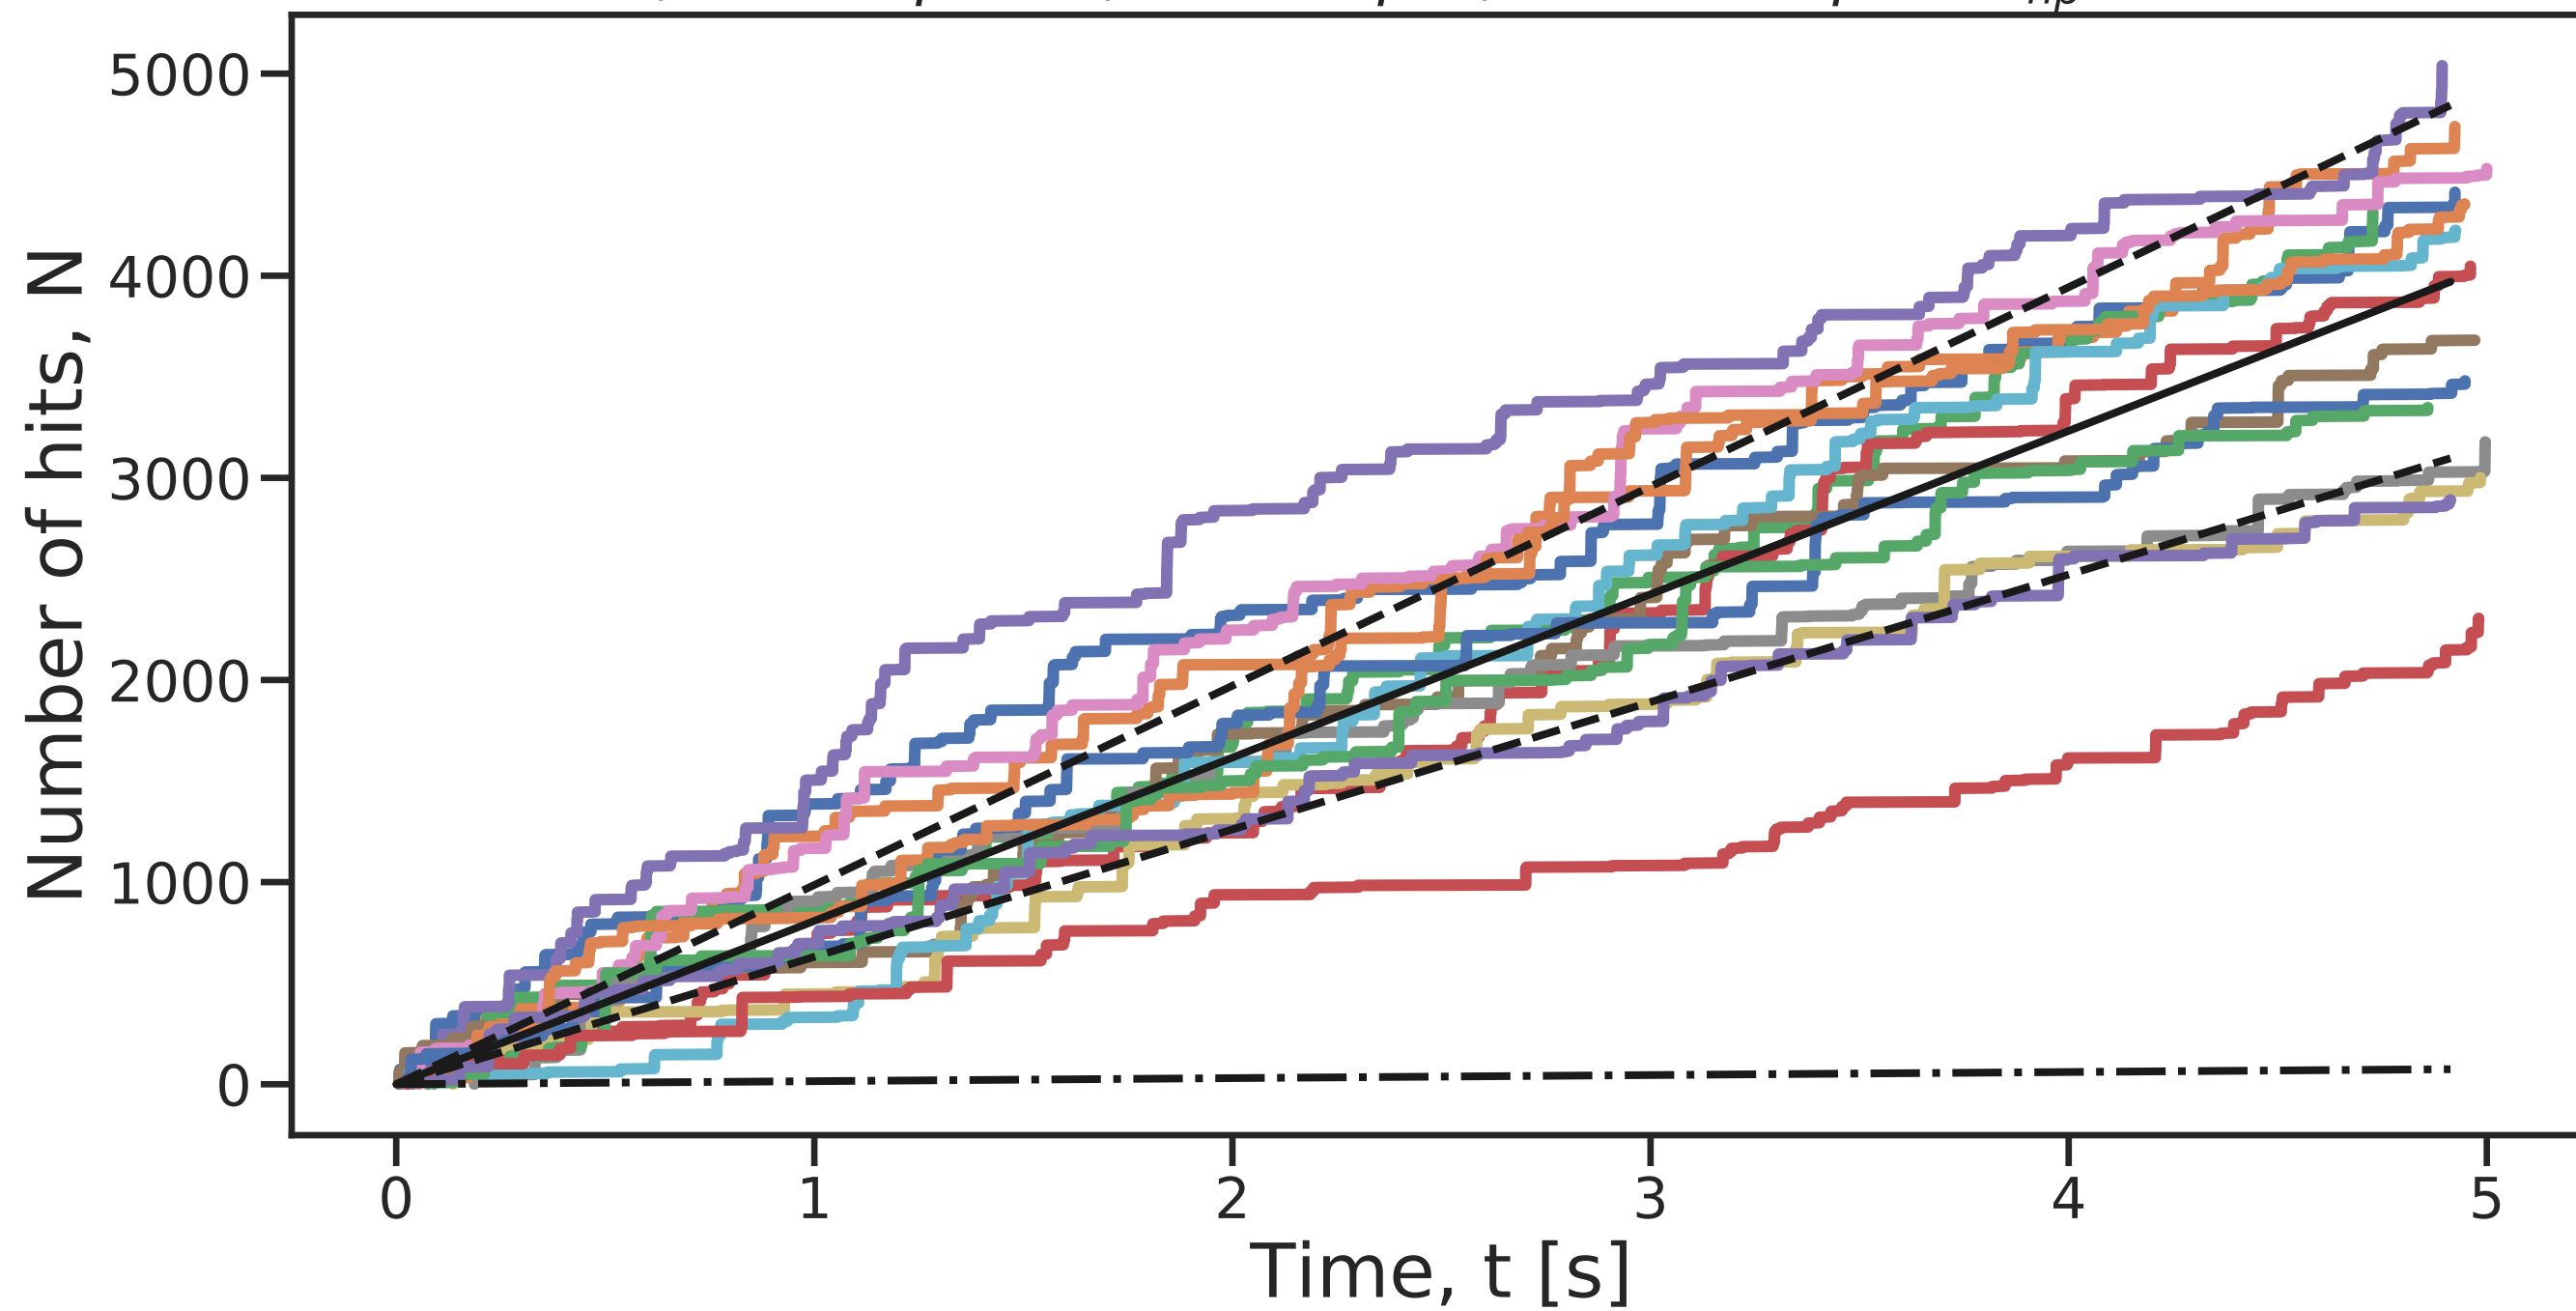

$c = 1.0 \text{ nM}$ ;  $D = 20 \text{ } \mu\text{m}^2/\text{s}$ ;  $R = 0.1 \text{ } \mu\text{m}$ ;  $\Delta t = 0.08 \text{ } \mu\text{s}$   $\langle N_{np} \rangle = 79.1 \pm 17.0$

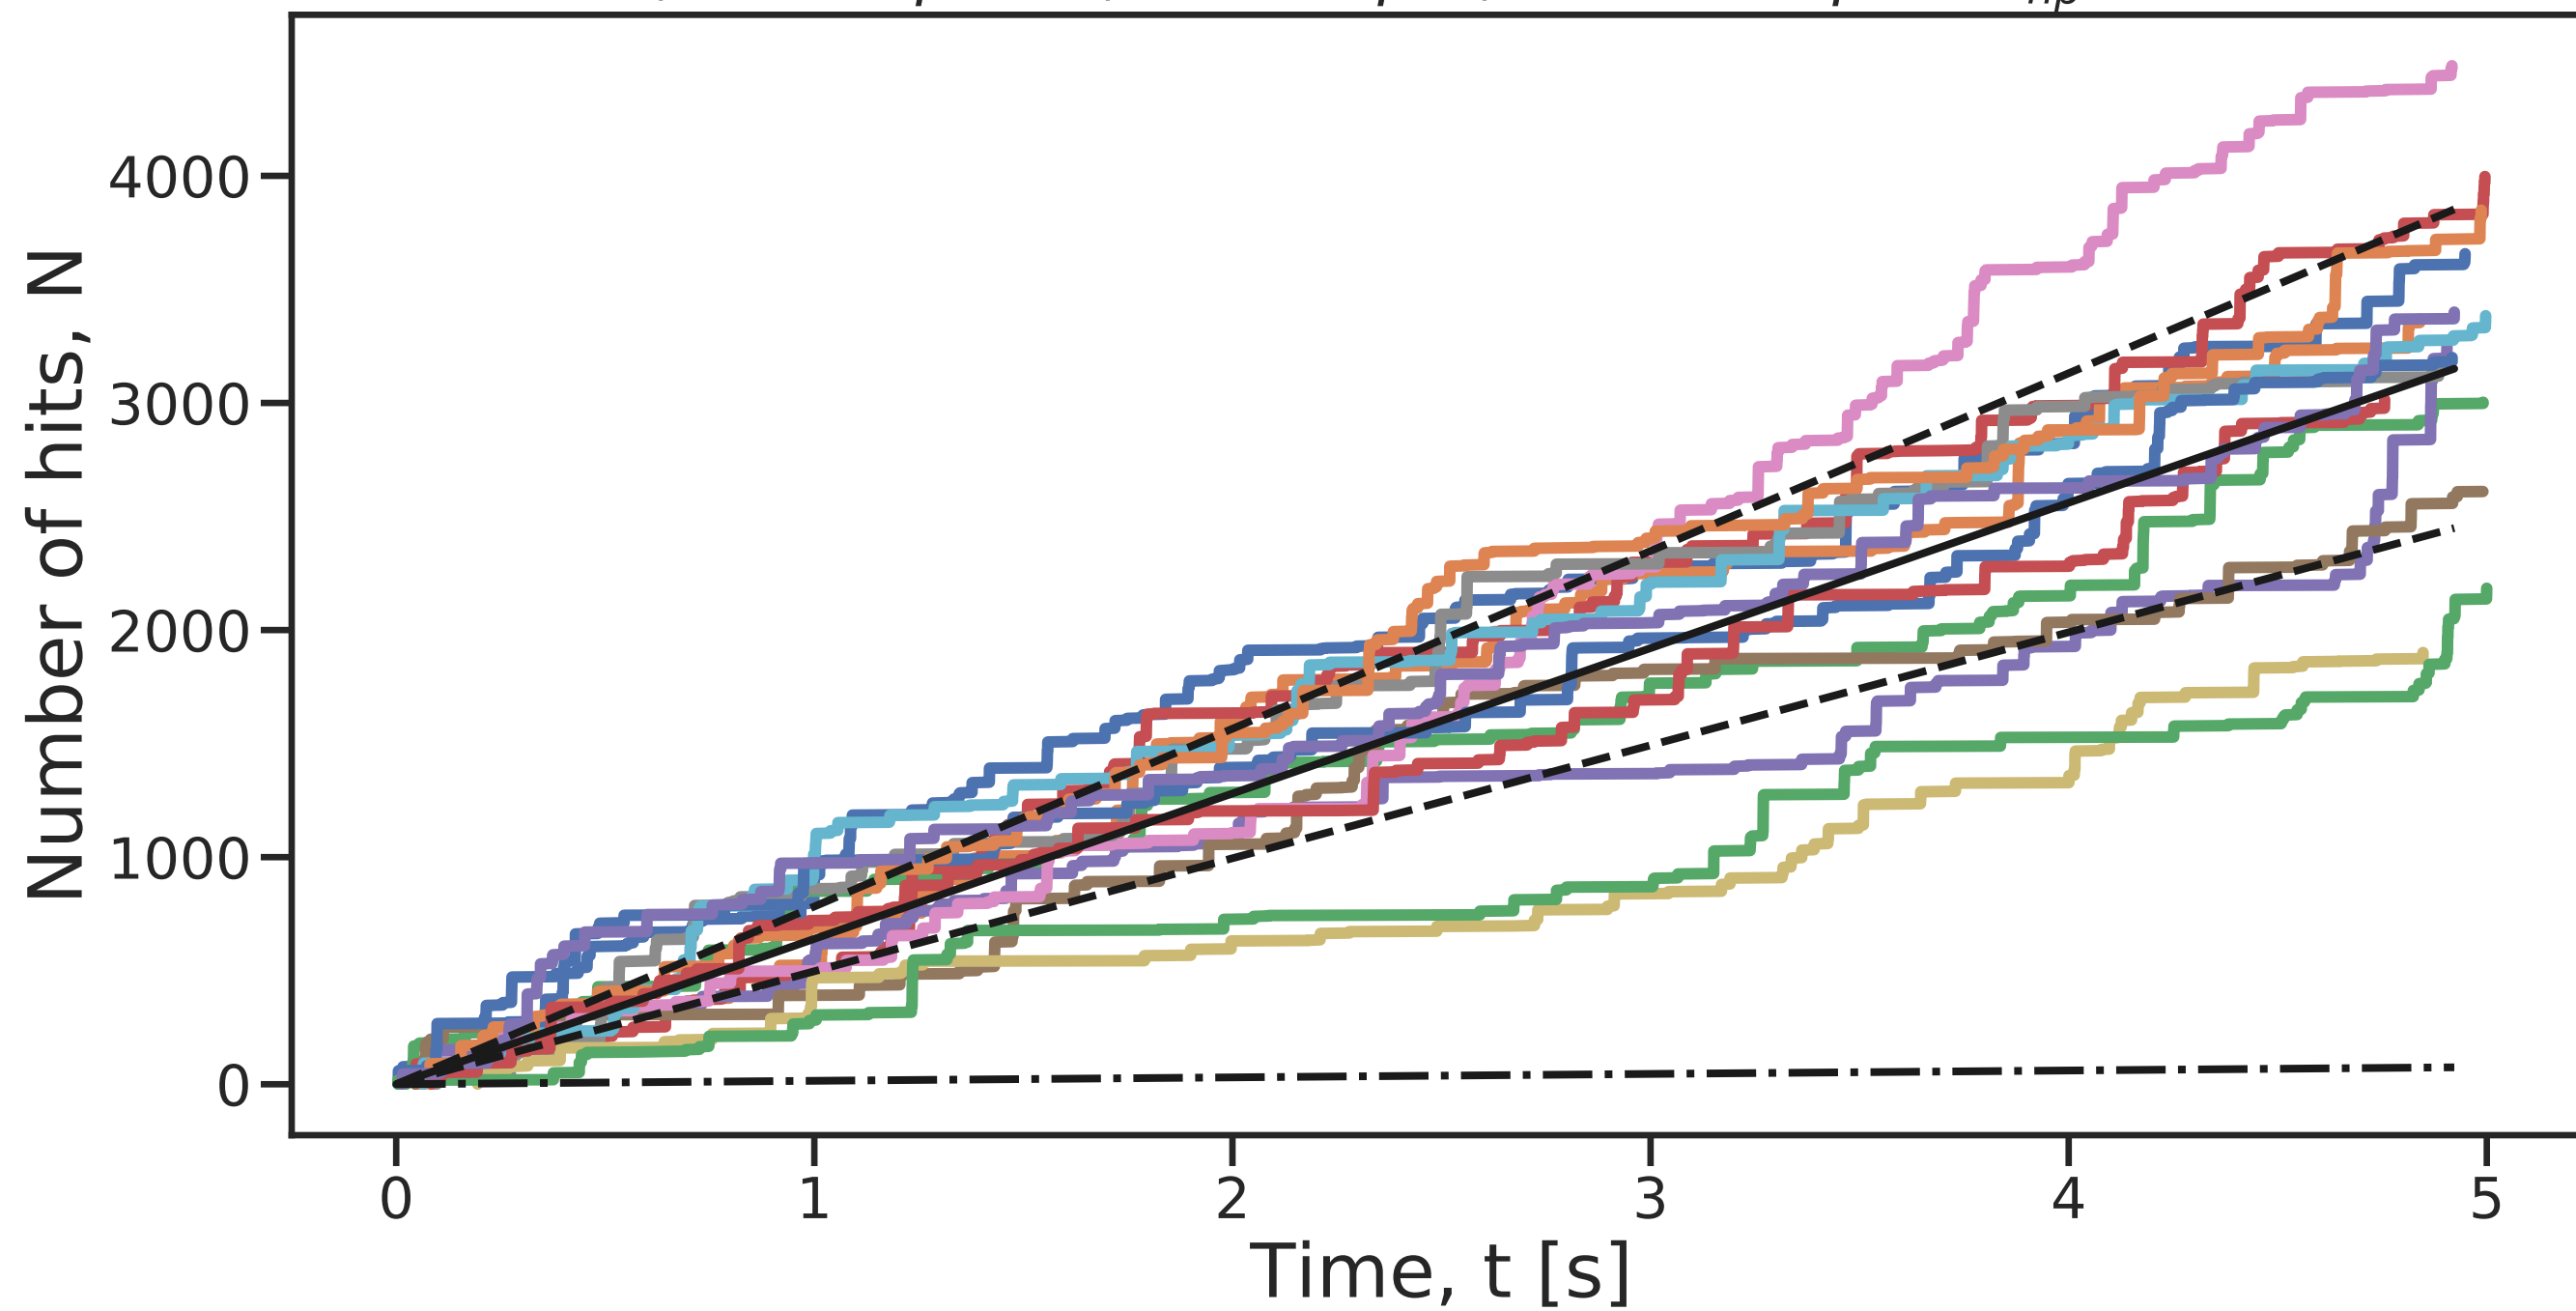

$c = 1.0 \text{ nM}; D = 20 \text{ } \mu\text{m}^2/\text{s}; R = 0.1 \text{ } \mu\text{m}; \Delta t = 0.1 \text{ } \mu\text{s} \langle N_{np} \rangle = 78.7 \pm 15.9$

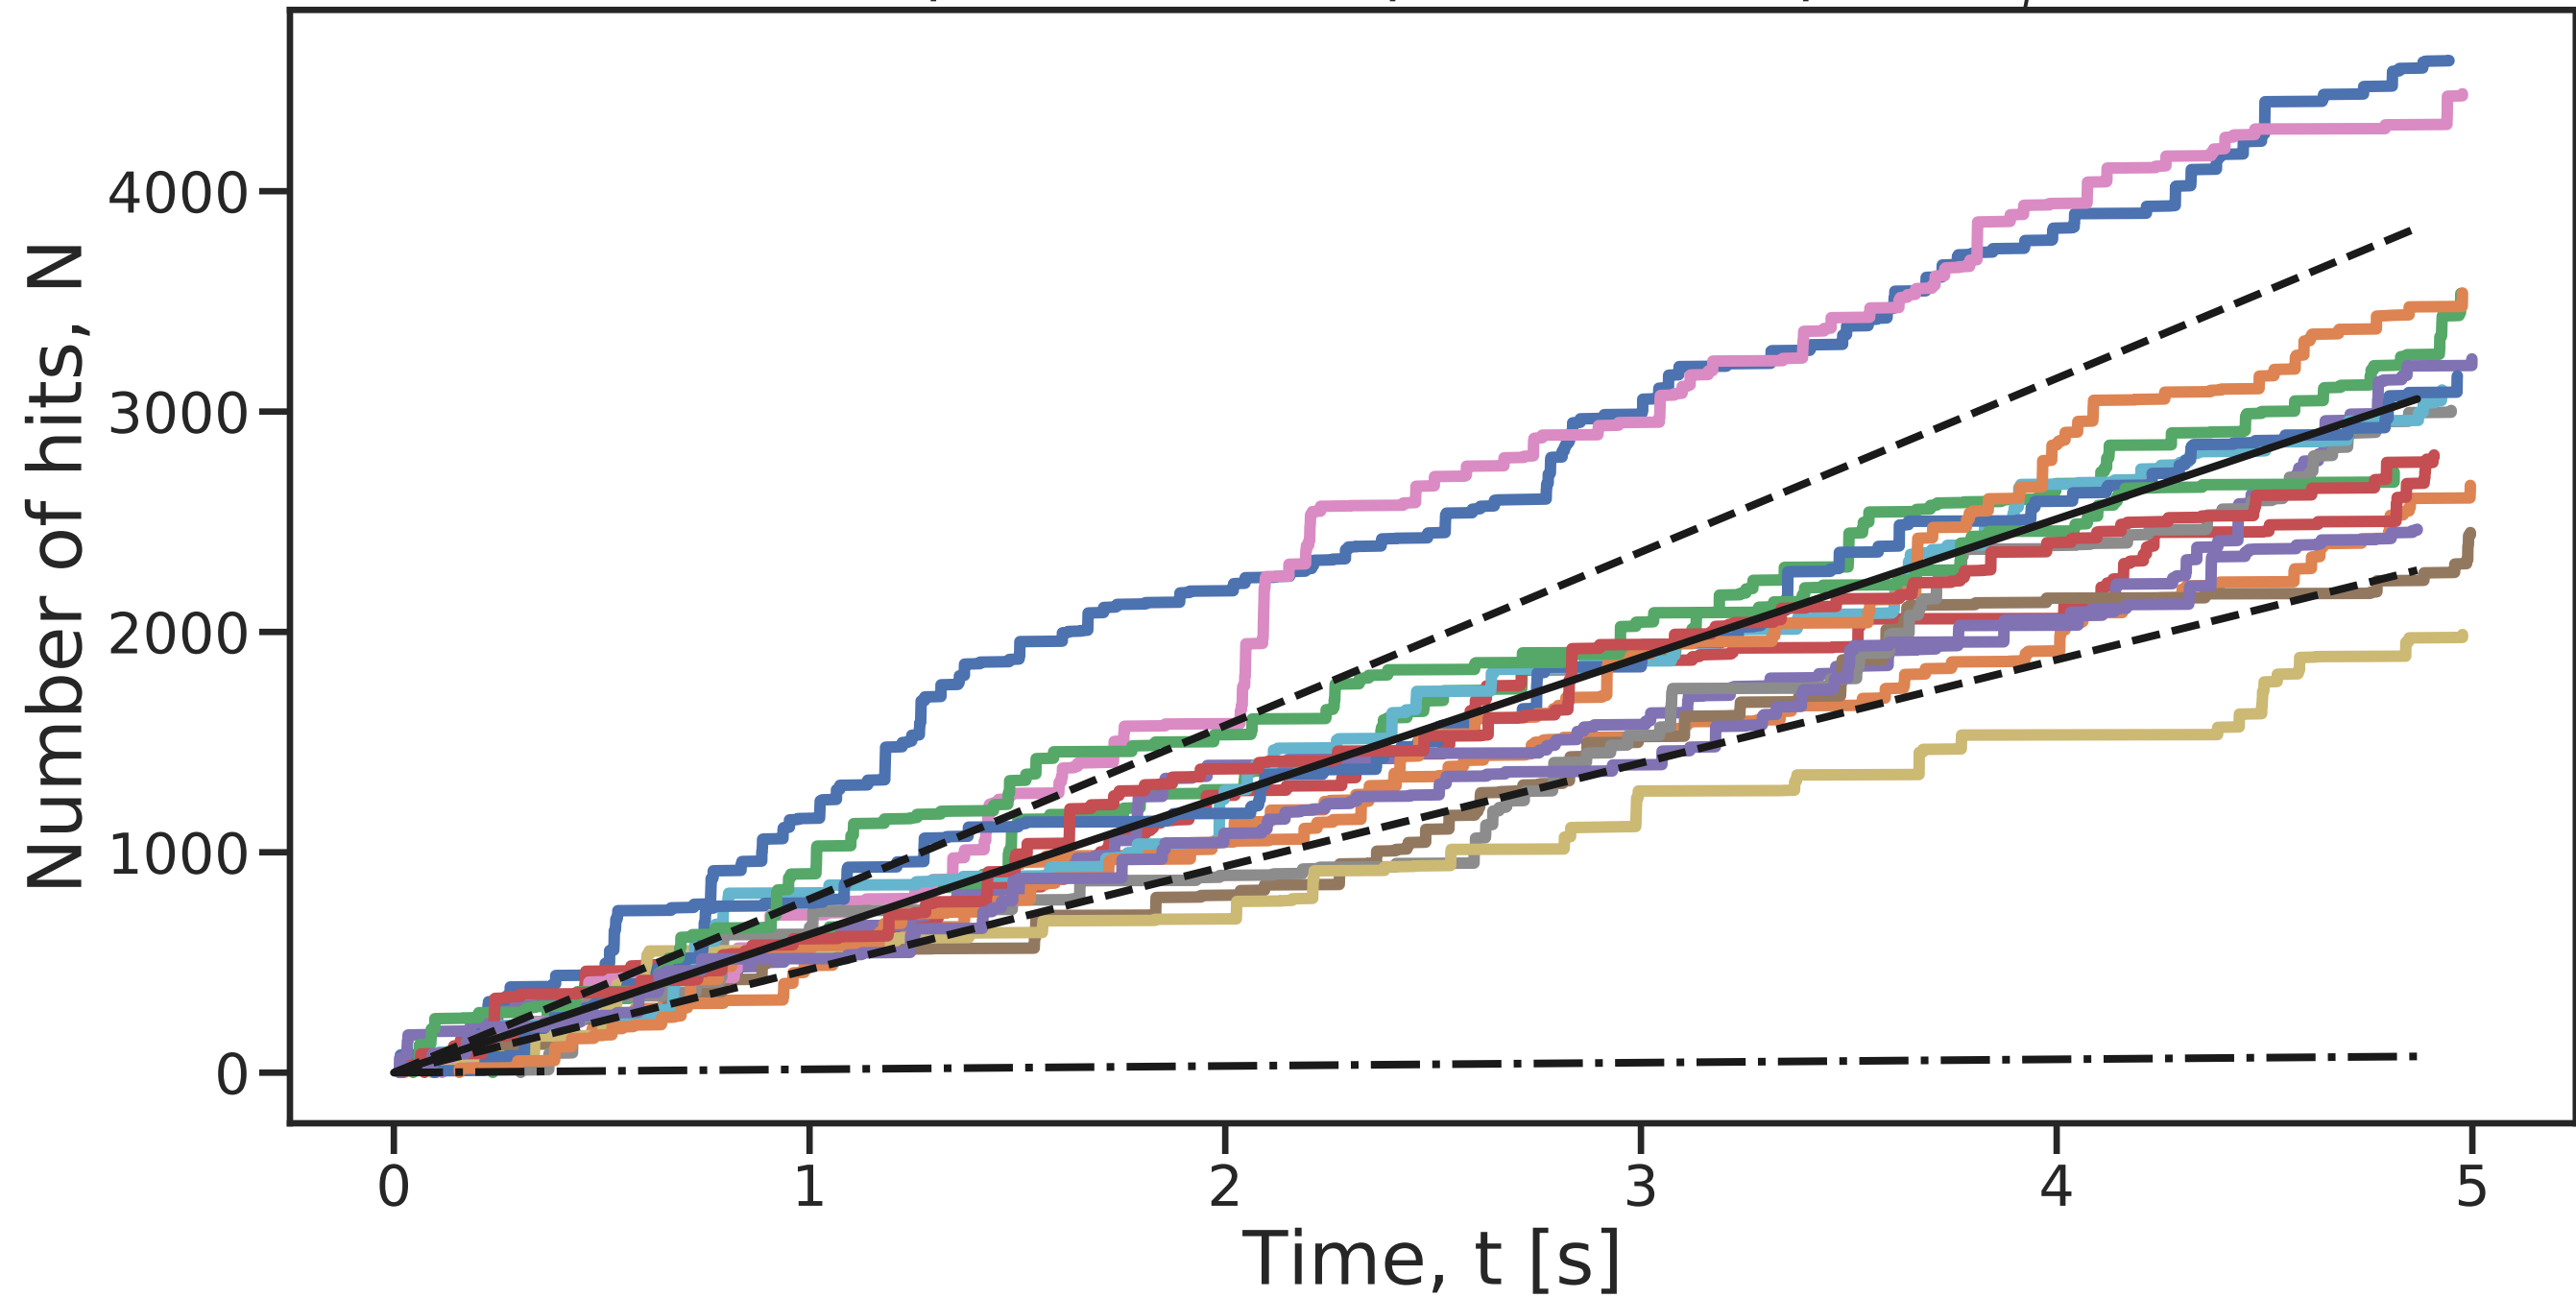

$c = 1.0 \text{ nM}$ ;  $D = 20 \text{ } \mu\text{m}^2/\text{s}$ ;  $R = 0.1 \text{ } \mu\text{m}$ ;  $\Delta t = 0.2 \text{ } \mu\text{s}$   $\langle N_{np} \rangle = 82.5 \pm 13.6$

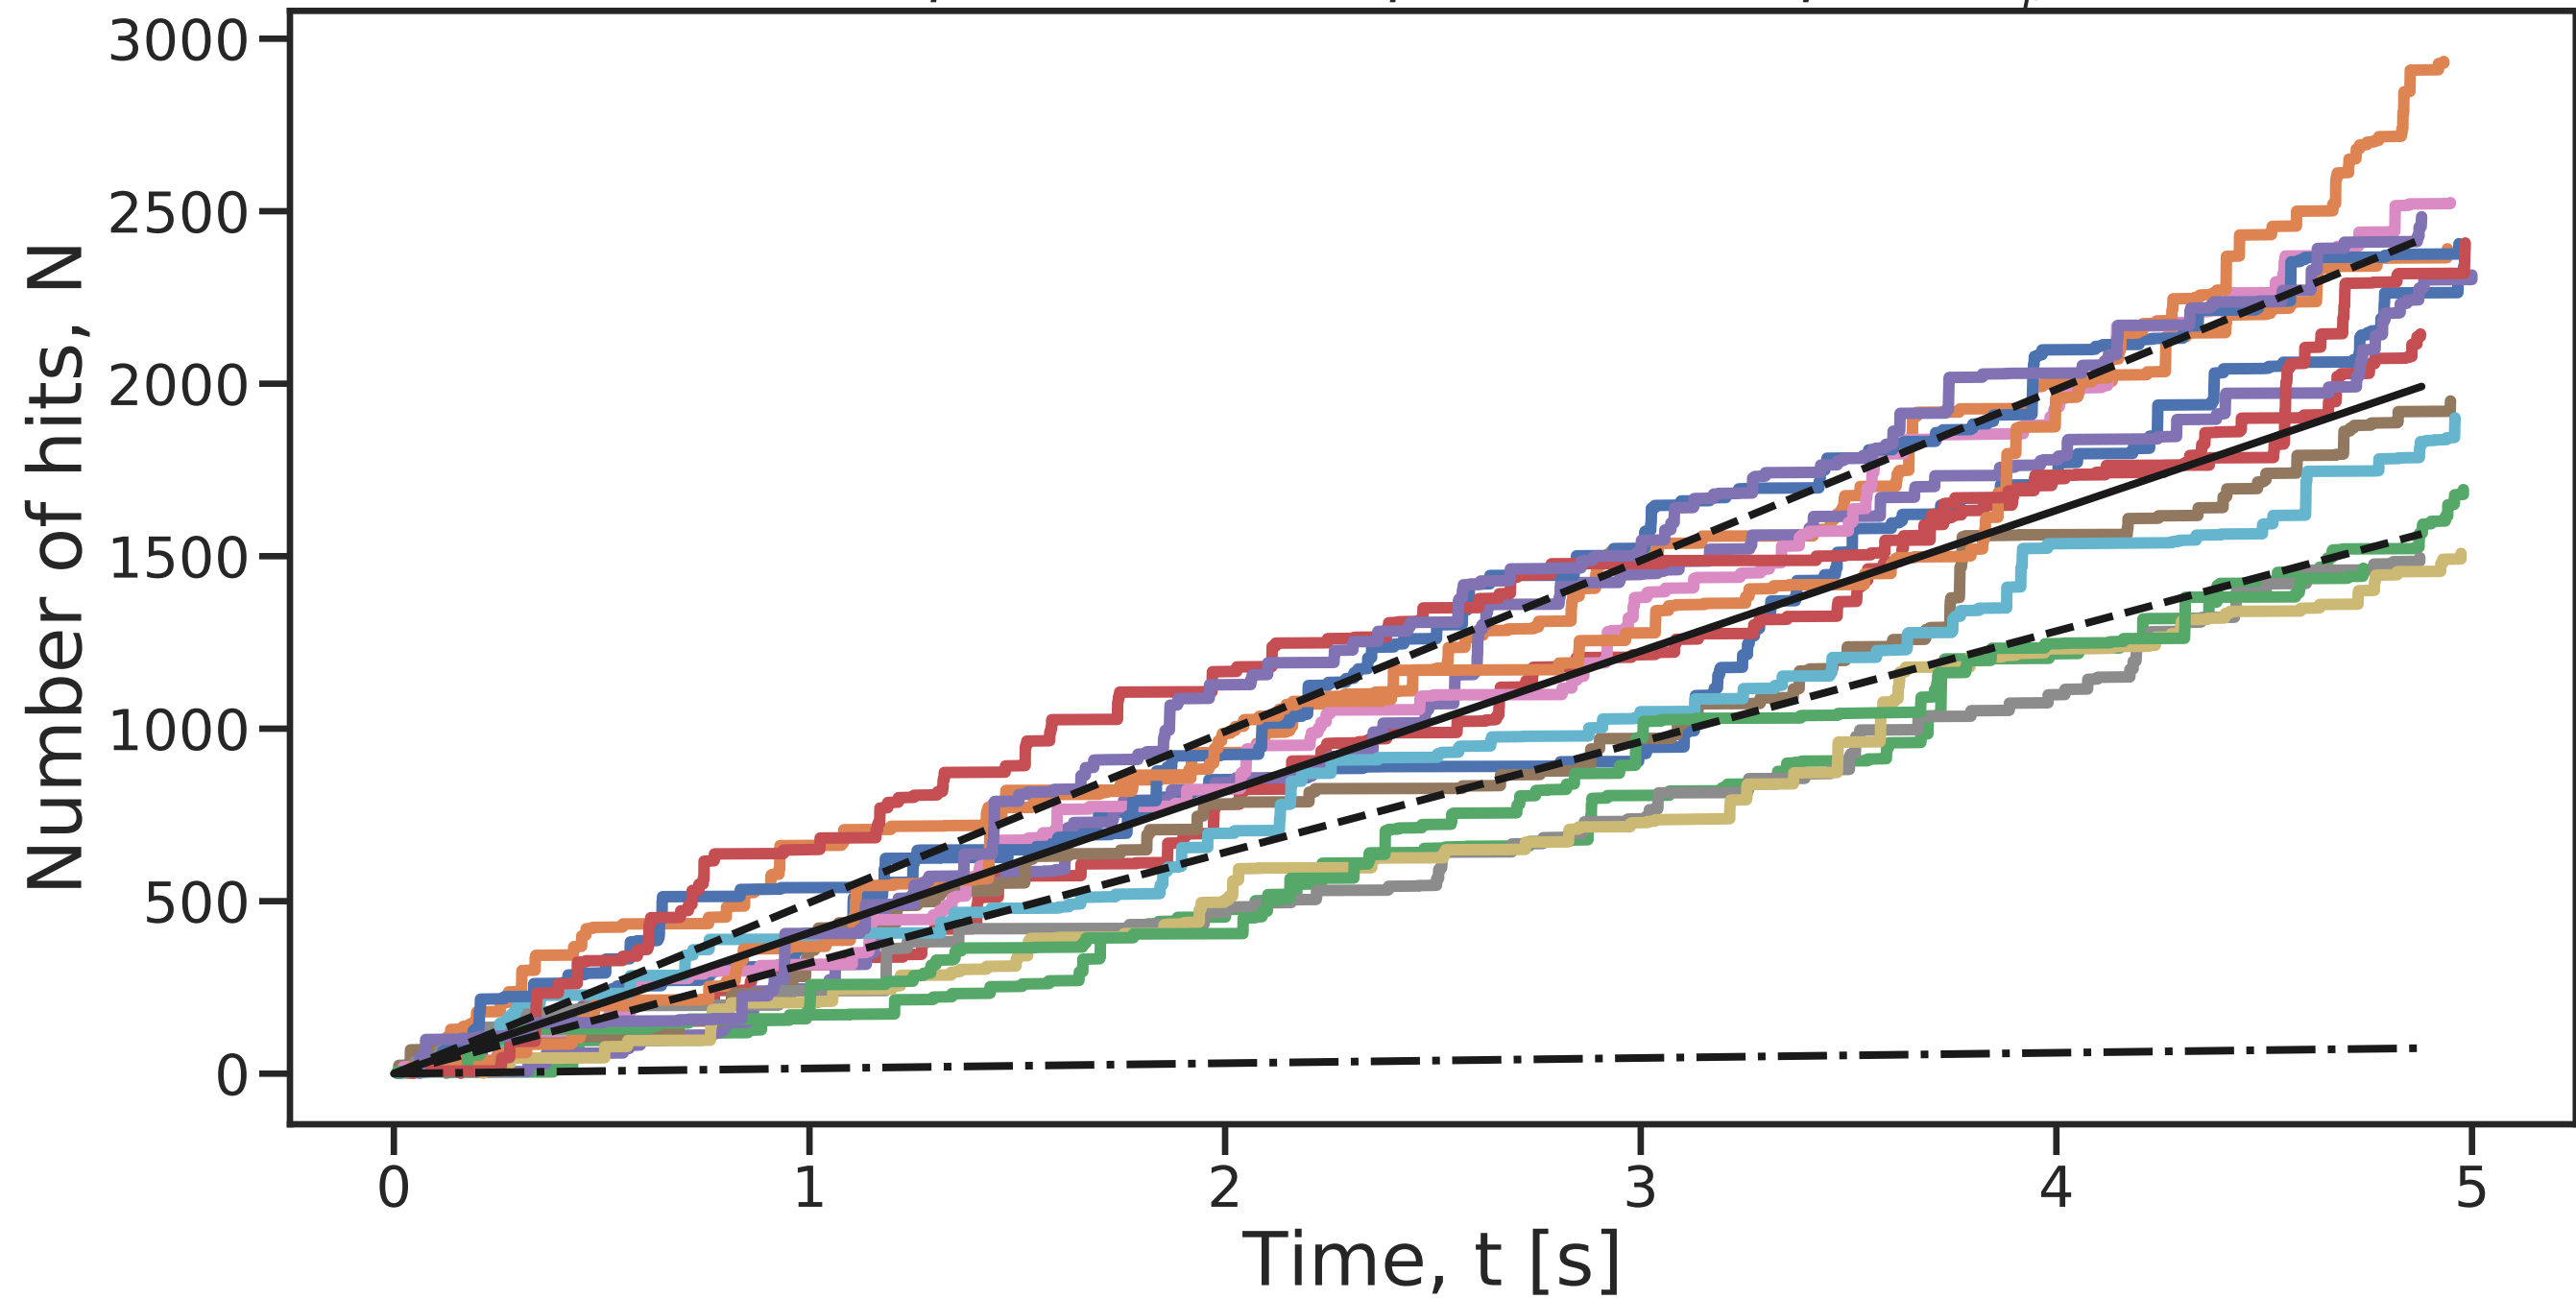

$c = 1.0 \text{ nM}; D = 20 \text{ } \mu\text{m}^2/\text{s}; R = 0.1 \text{ } \mu\text{m}; \Delta t = 0.4 \text{ } \mu\text{s} \langle N_{np} \rangle = 83.3 \pm 14.6$

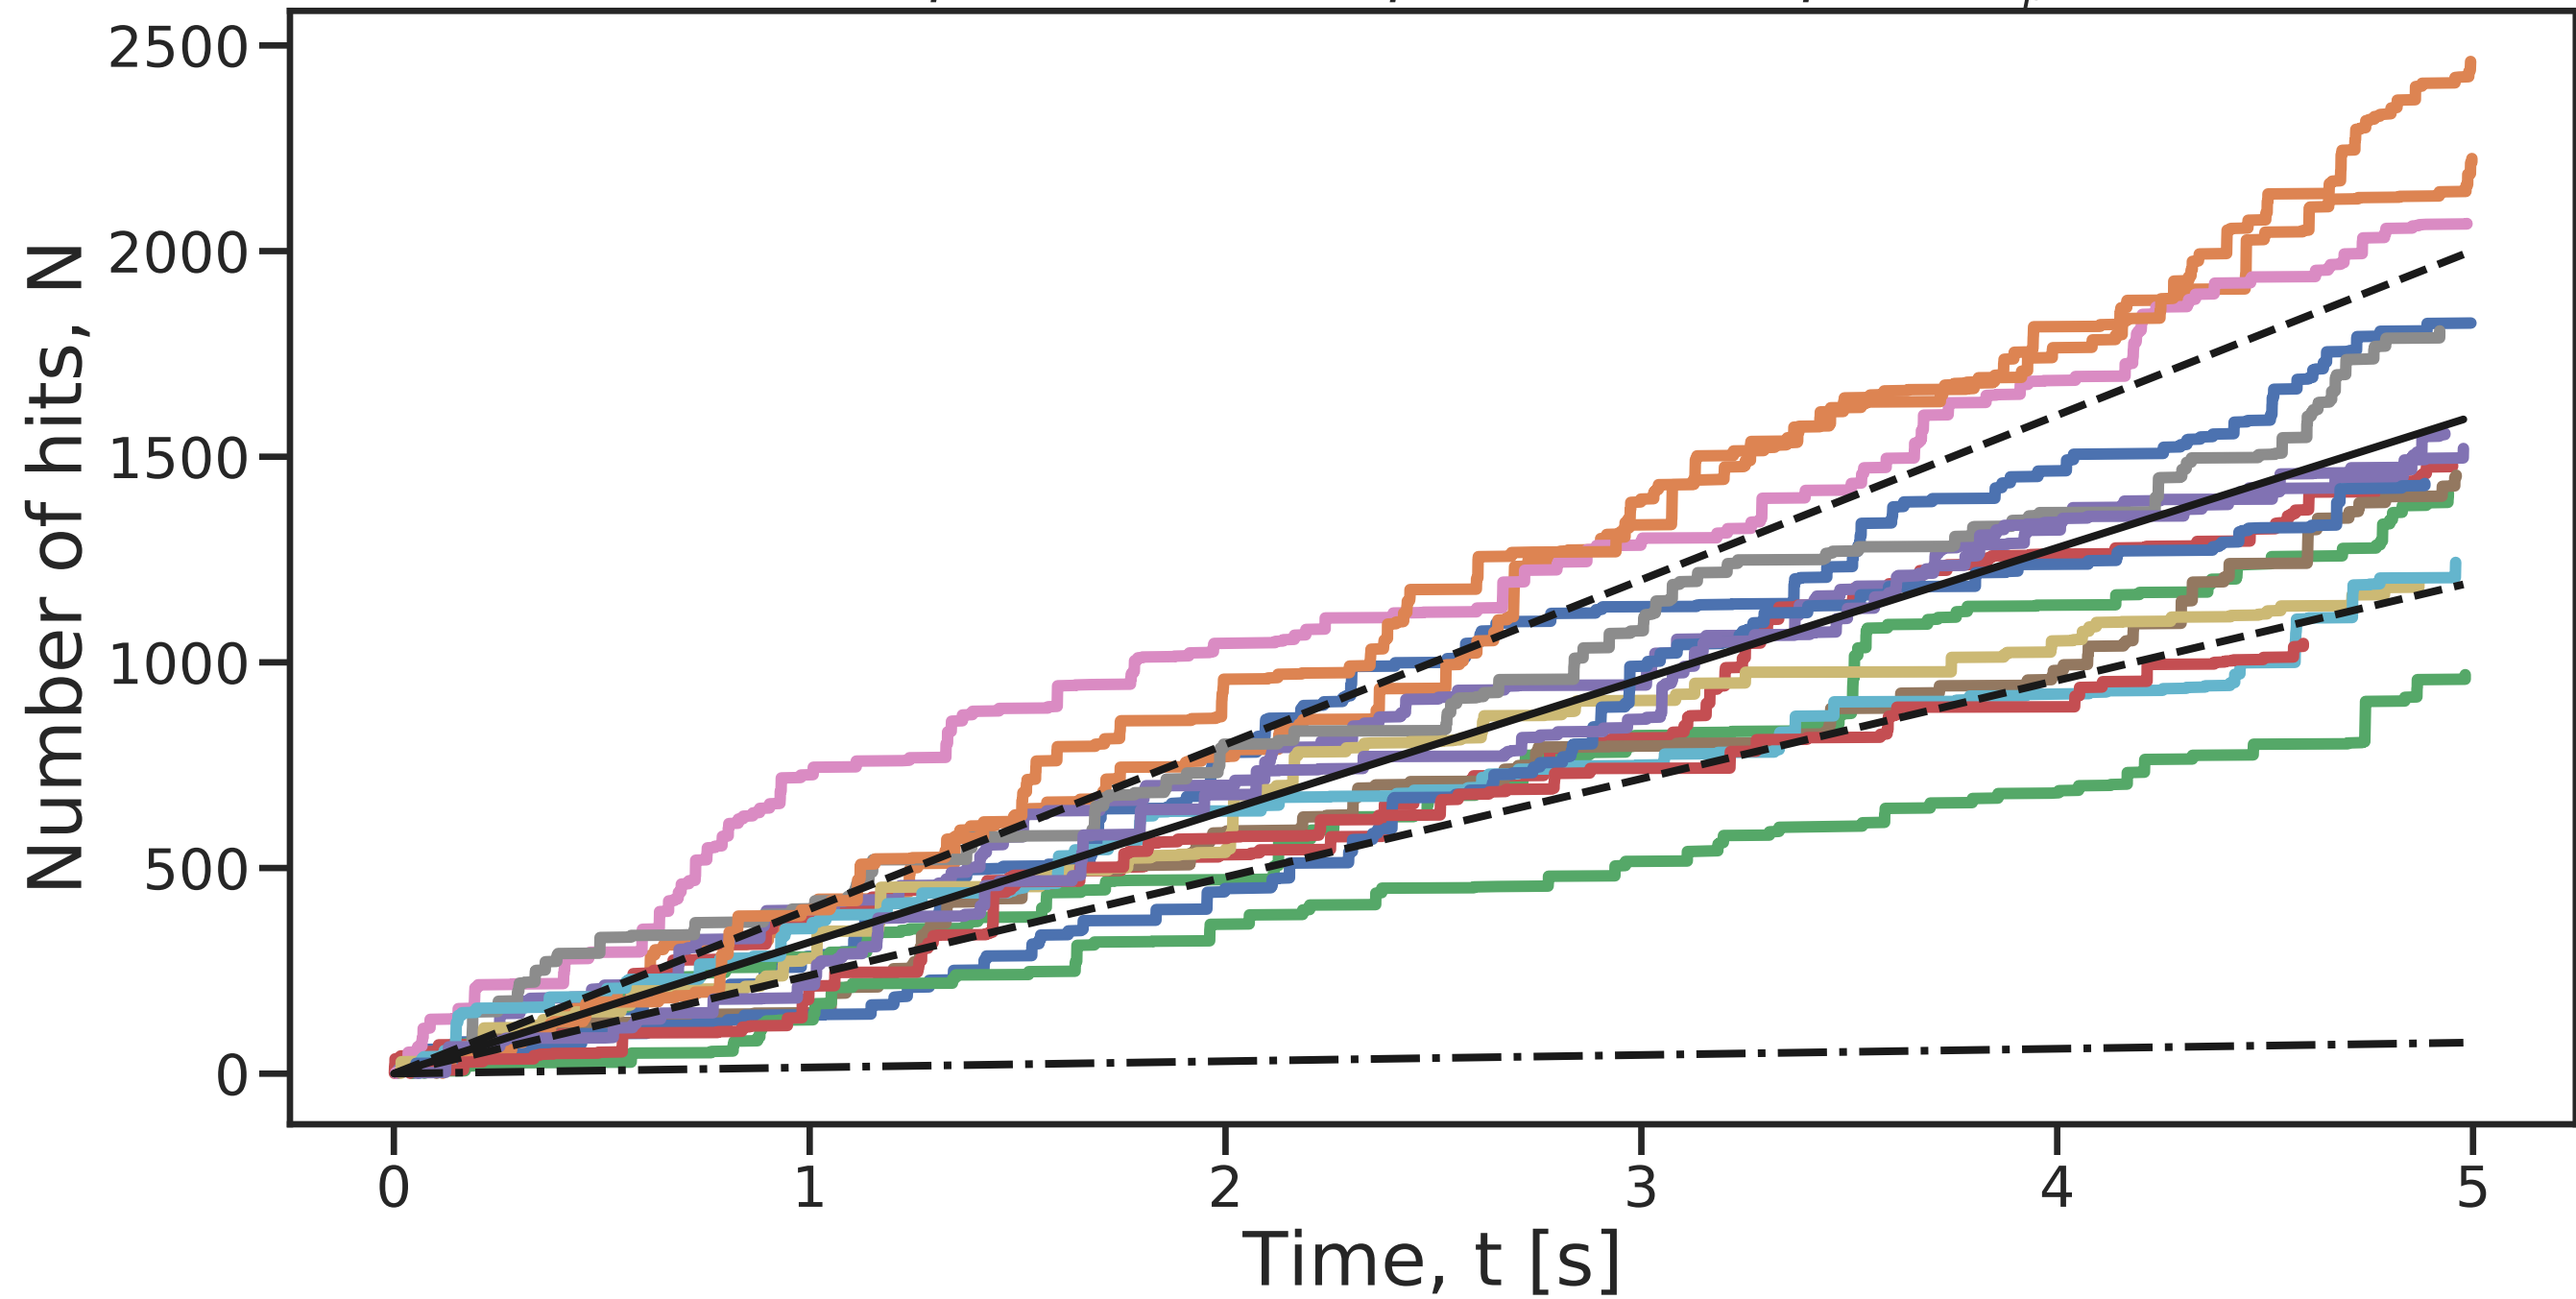



$c = 1.0 \text{ nM}; D = 20 \text{ } \mu\text{m}^2/\text{s}; R = 0.1 \text{ } \mu\text{m}; \Delta t = 0.6 \text{ } \mu\text{s} \langle N_{np} \rangle = 80.0 \pm 17.3$

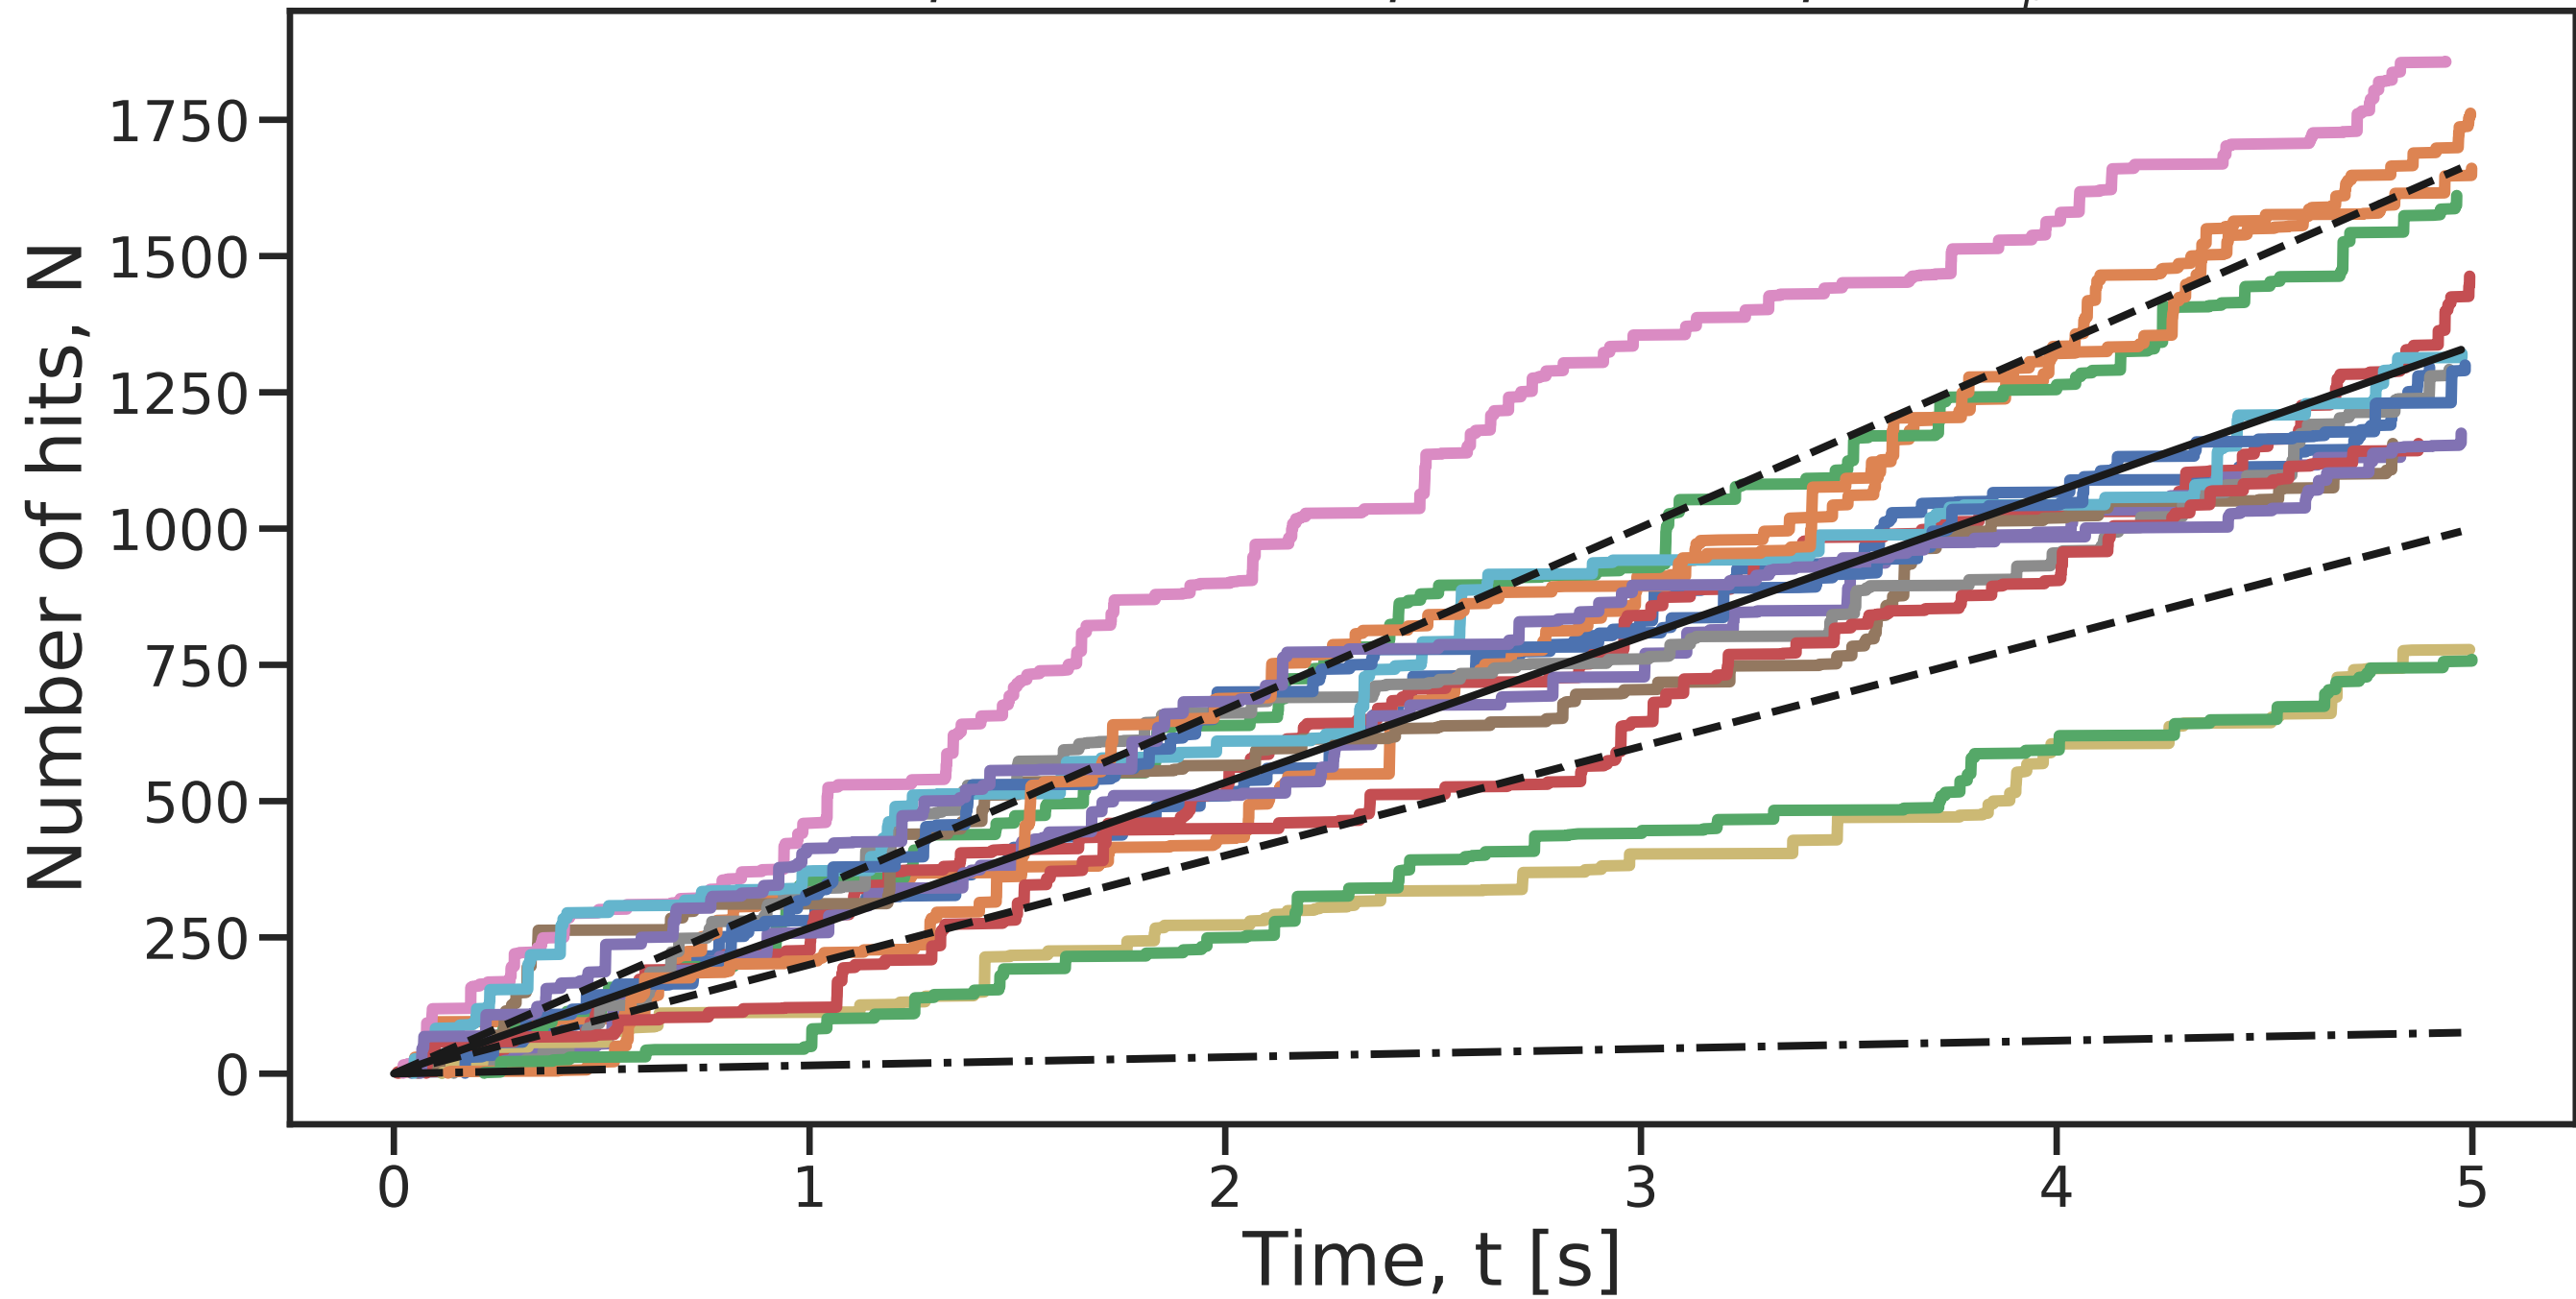

$c = 1.0 \text{ nM}; D = 20 \mu\text{m}^2/\text{s}; R = 0.1 \mu\text{m}; \Delta t = 0.8 \mu\text{s} \langle N_{np} \rangle = 78.2 \pm 18.0$

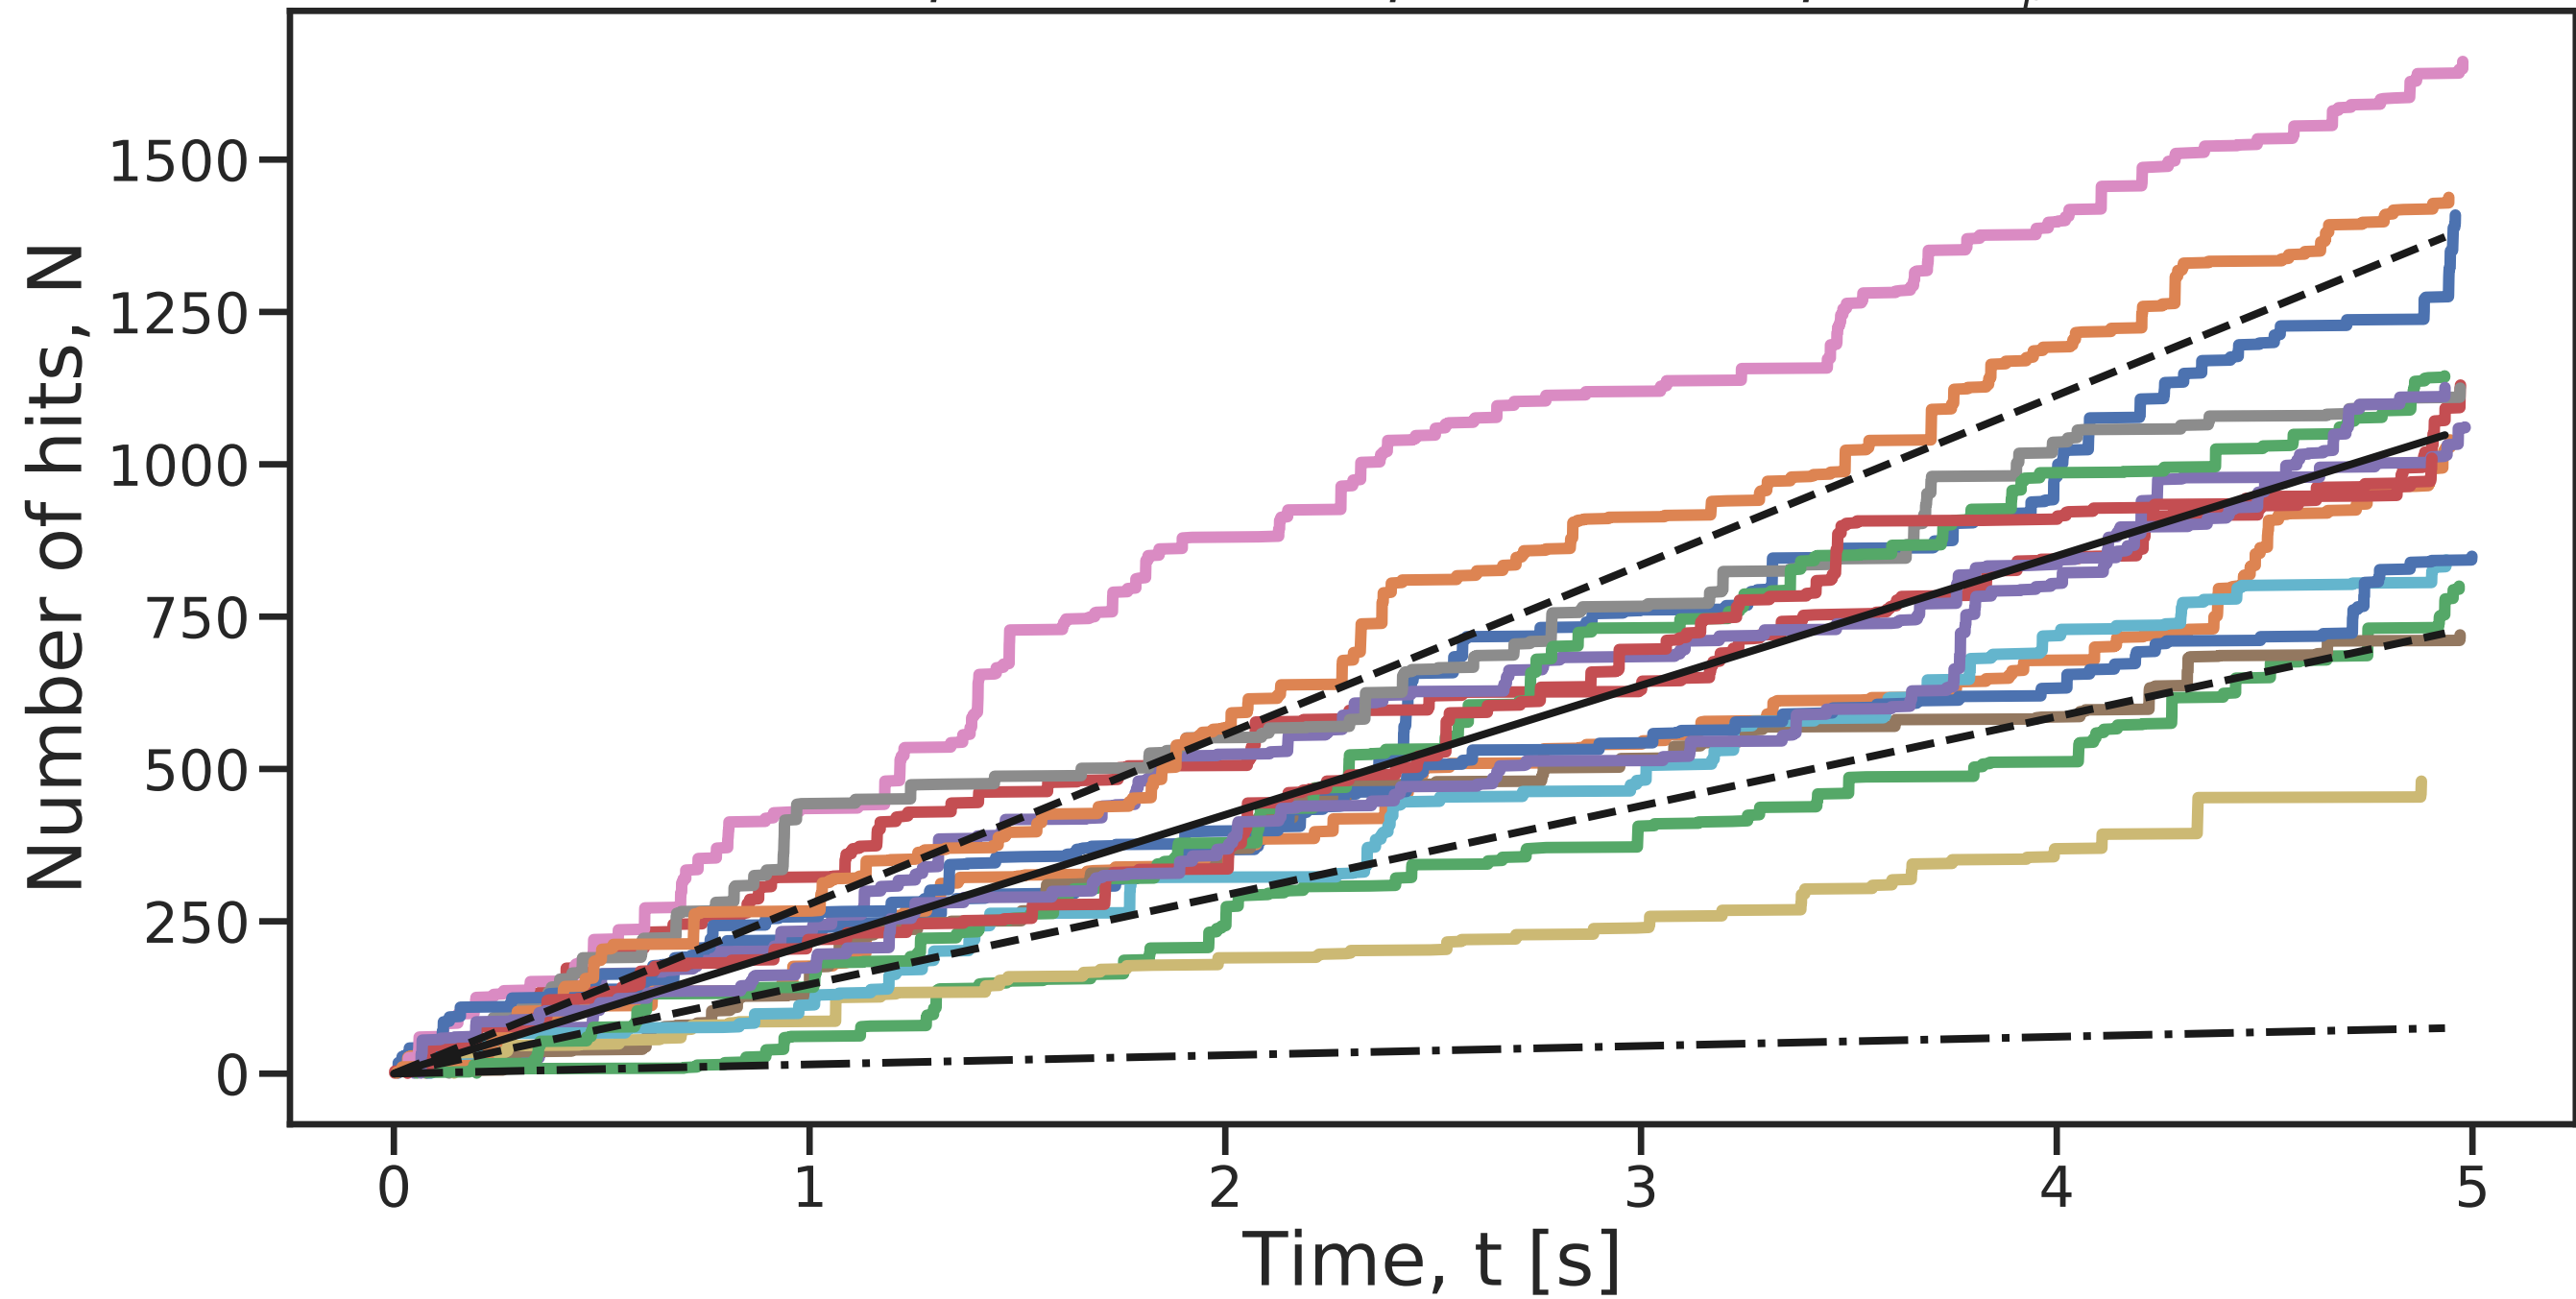

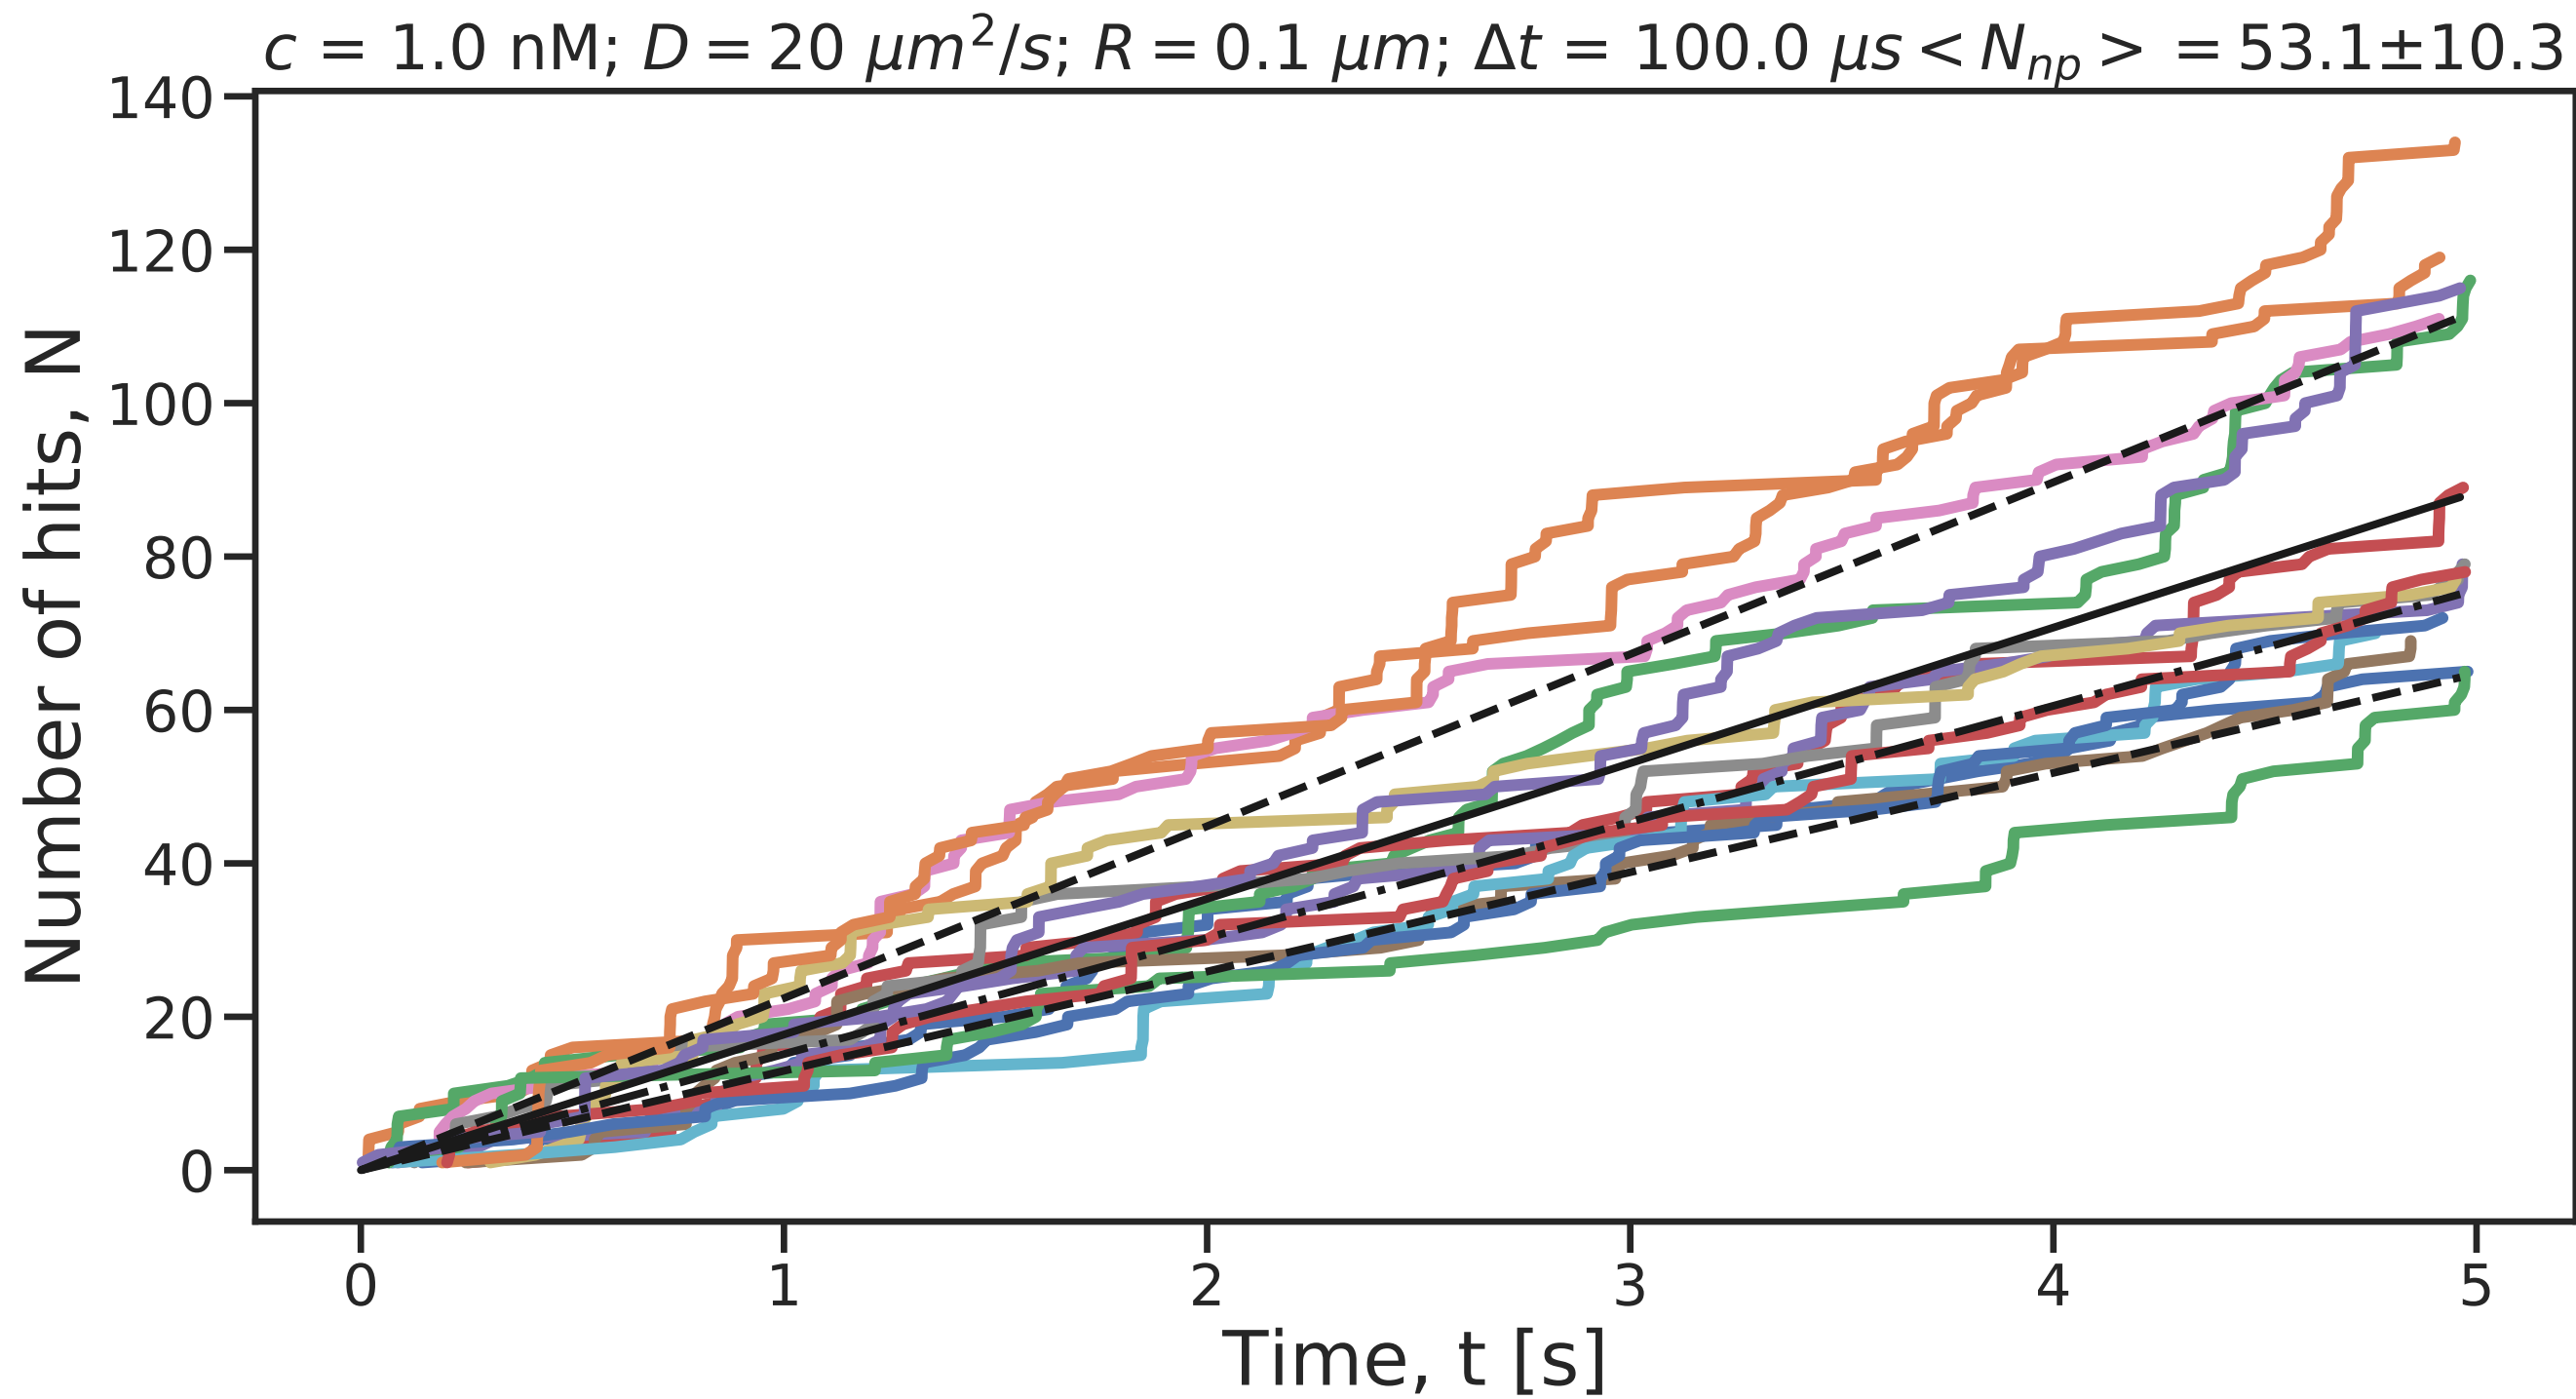

$c = 1.0 \text{ nM}; D = 20 \text{ } \mu\text{m}^2/\text{s}; R = 0.1 \text{ } \mu\text{m}; \Delta t = 10.0 \text{ } \mu\text{s} \langle N_{np} \rangle = 70.1 \pm 15.7$

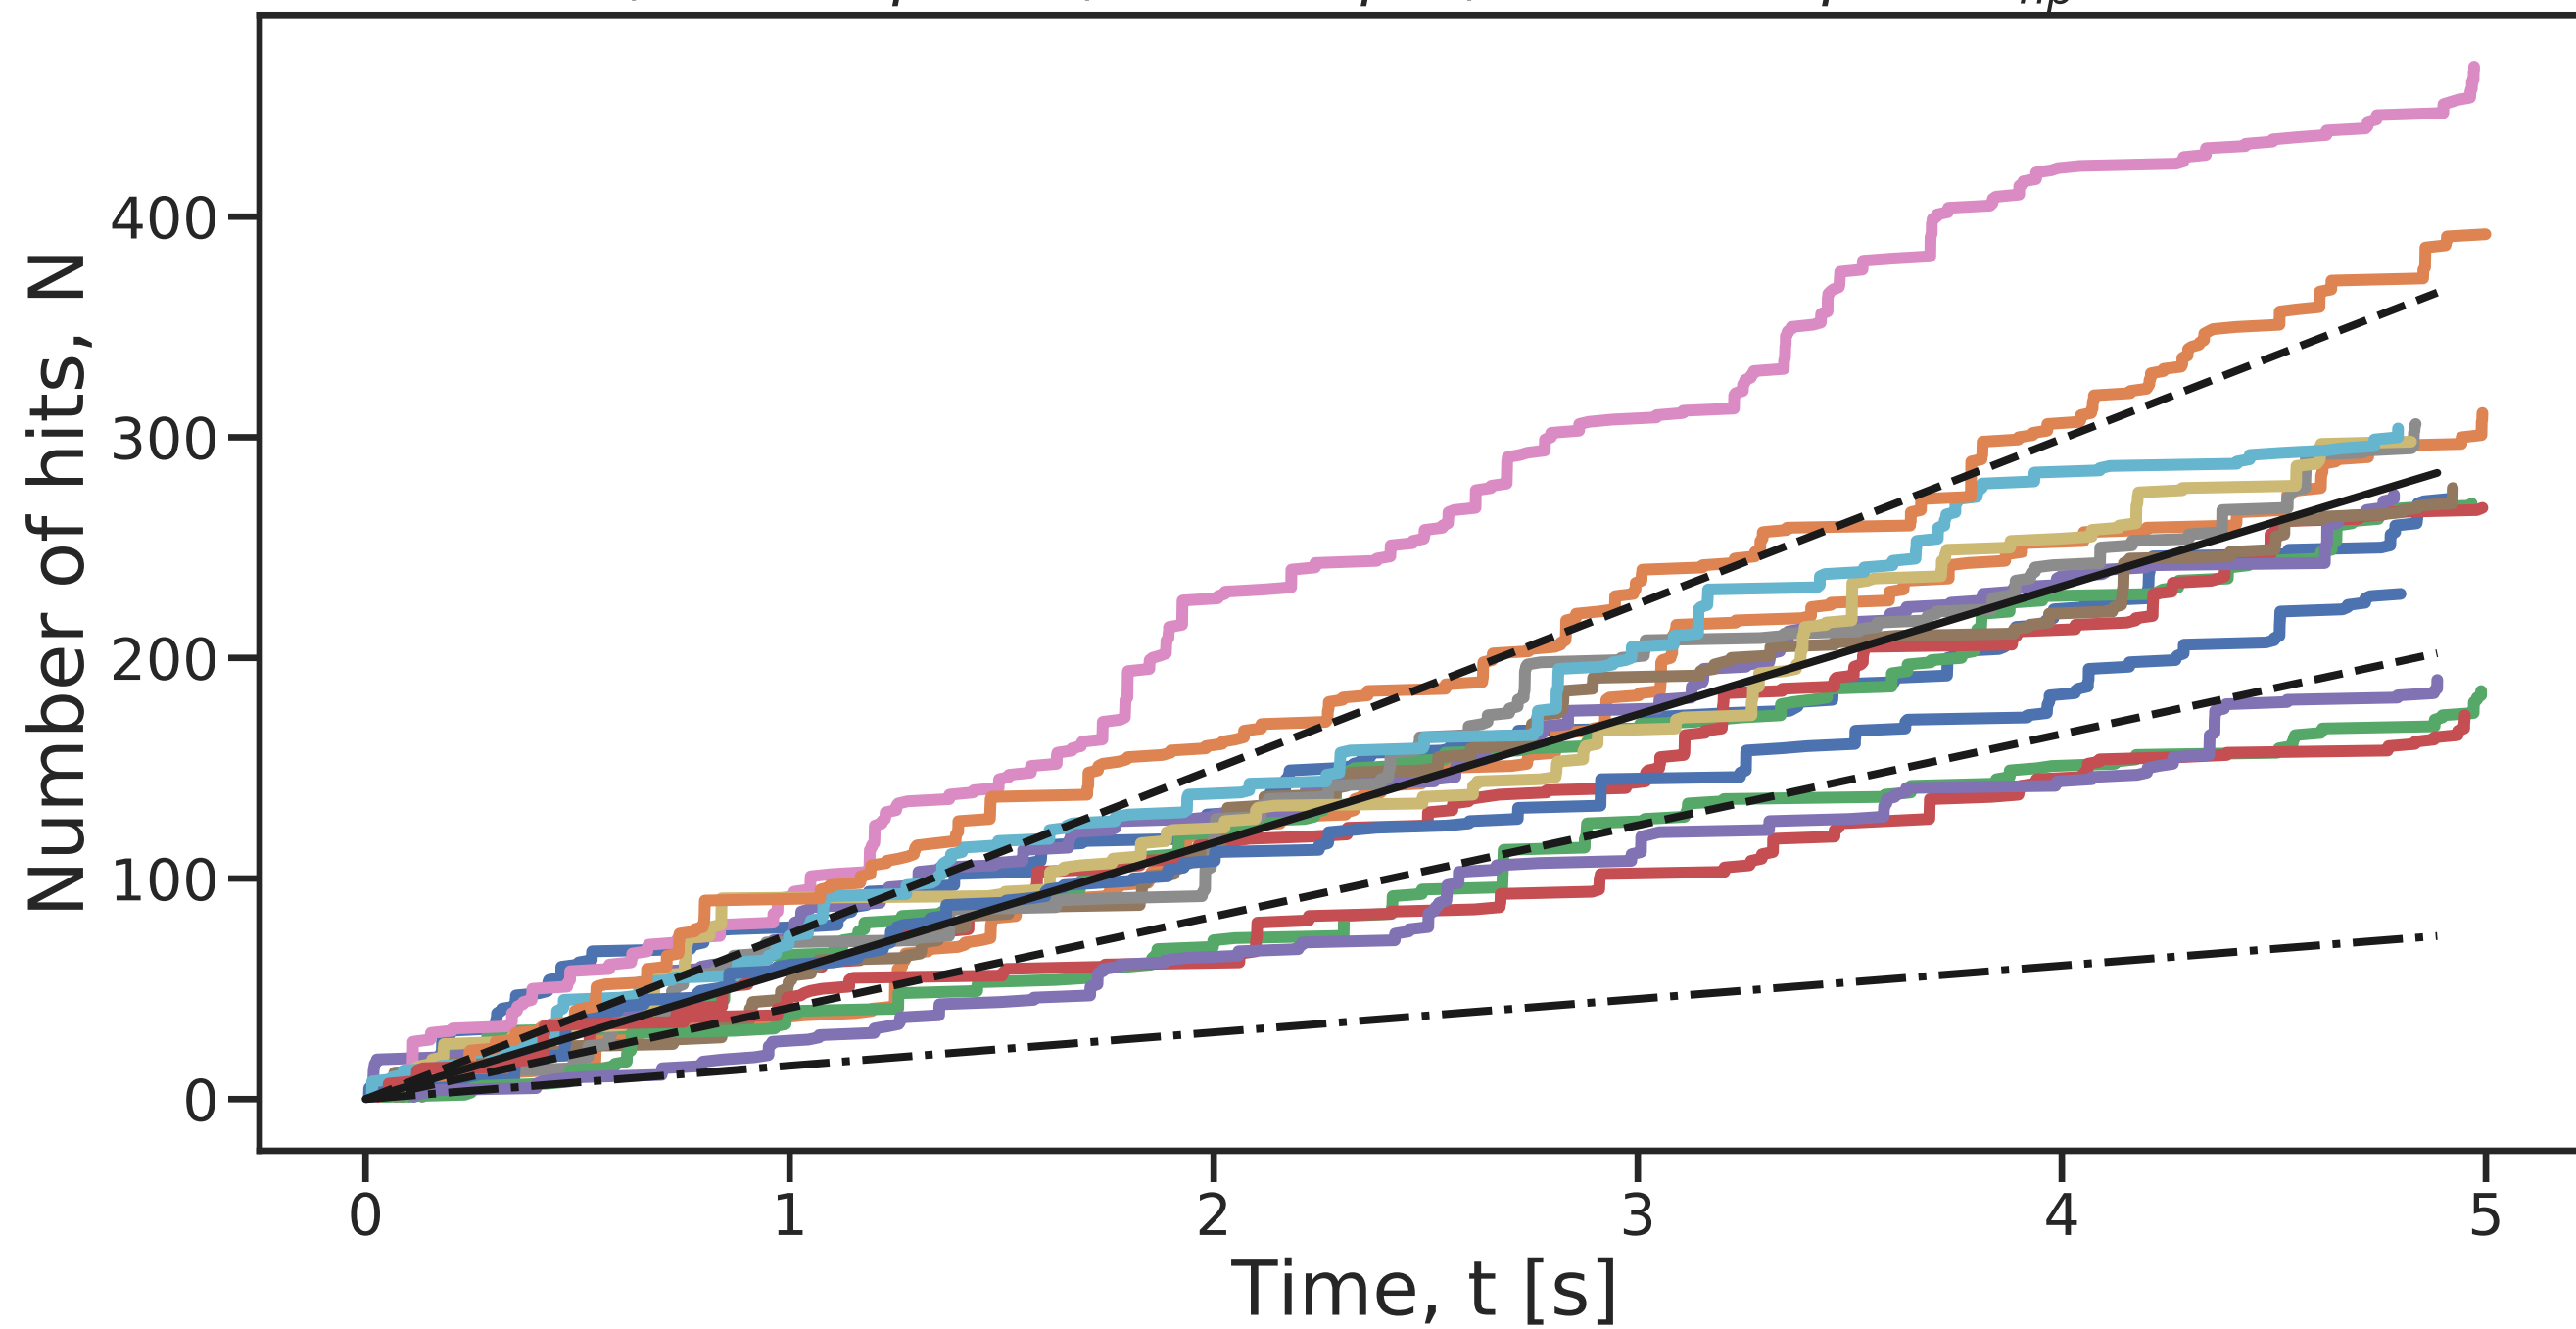

$c = 1.0 \text{ nM}$ ;  $D = 20 \text{ } \mu\text{m}^2/\text{s}$ ;  $R = 0.1 \text{ } \mu\text{m}$ ;  $\Delta t = 1.0 \text{ } \mu\text{s}$   $\langle N_{np} \rangle = 78.4 \pm 15.5$

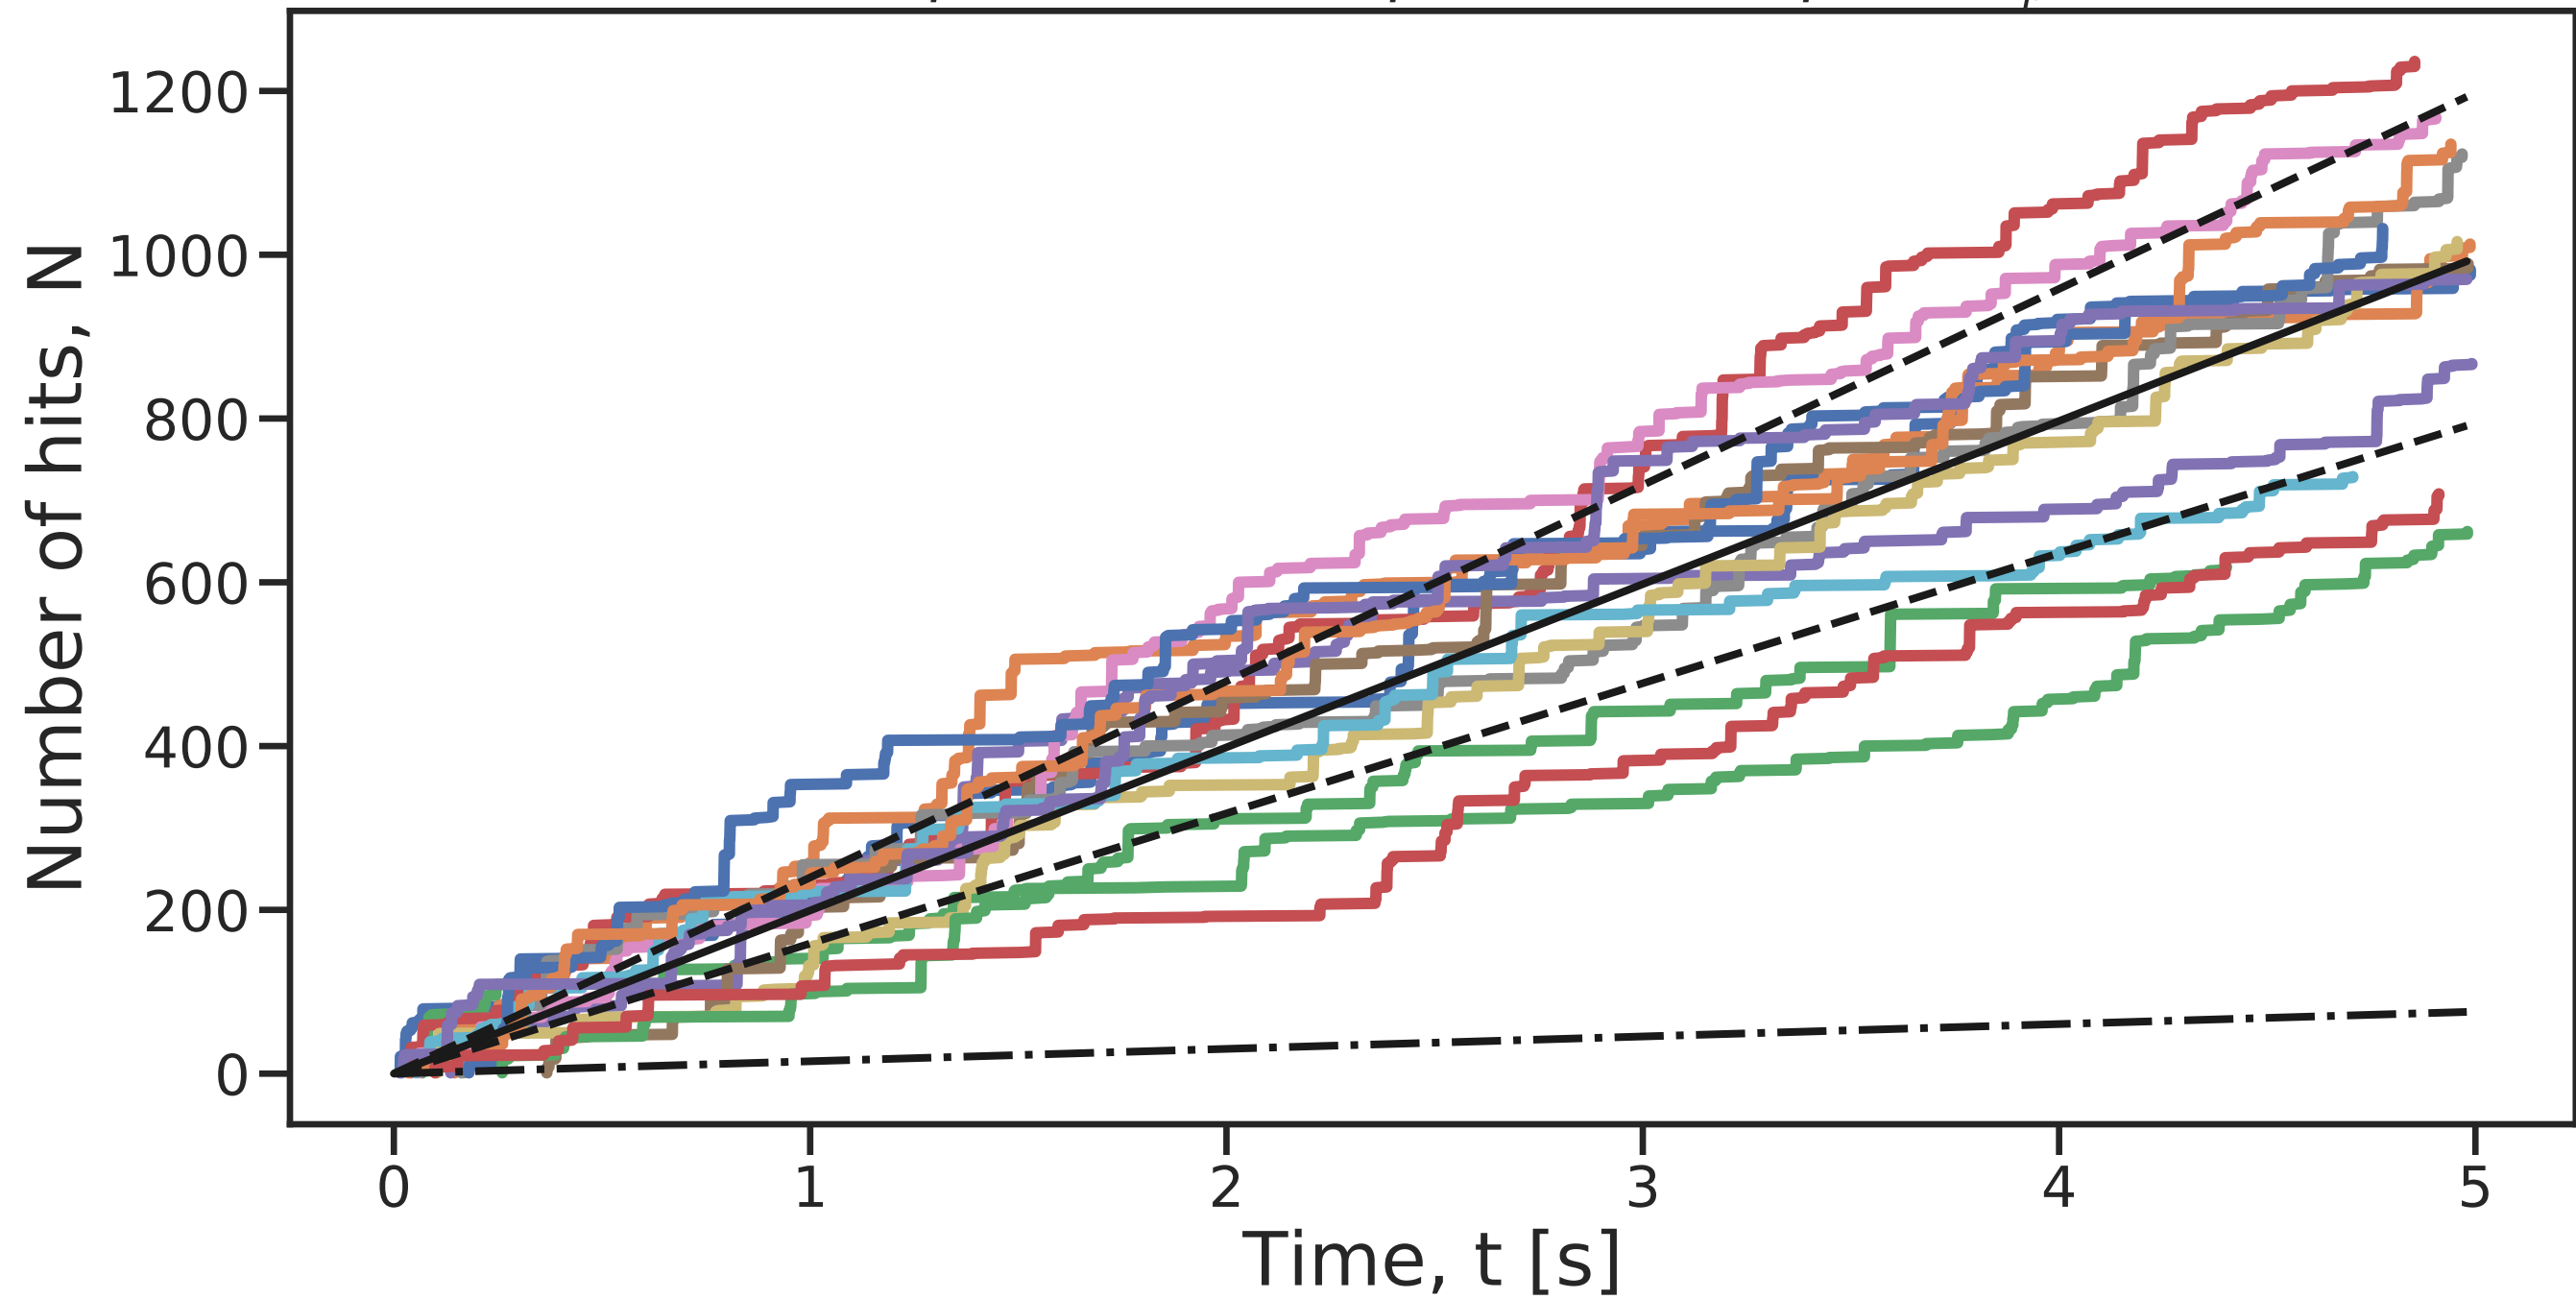

$c = 1.0 \text{ nM}$ ;  $D = 20 \text{ } \mu\text{m}^2/\text{s}$ ;  $R = 0.1 \text{ } \mu\text{m}$ ;  $\Delta t = 20.0 \text{ } \mu\text{s}$   $\langle N_{np} \rangle = 67.1 \pm 13.4$

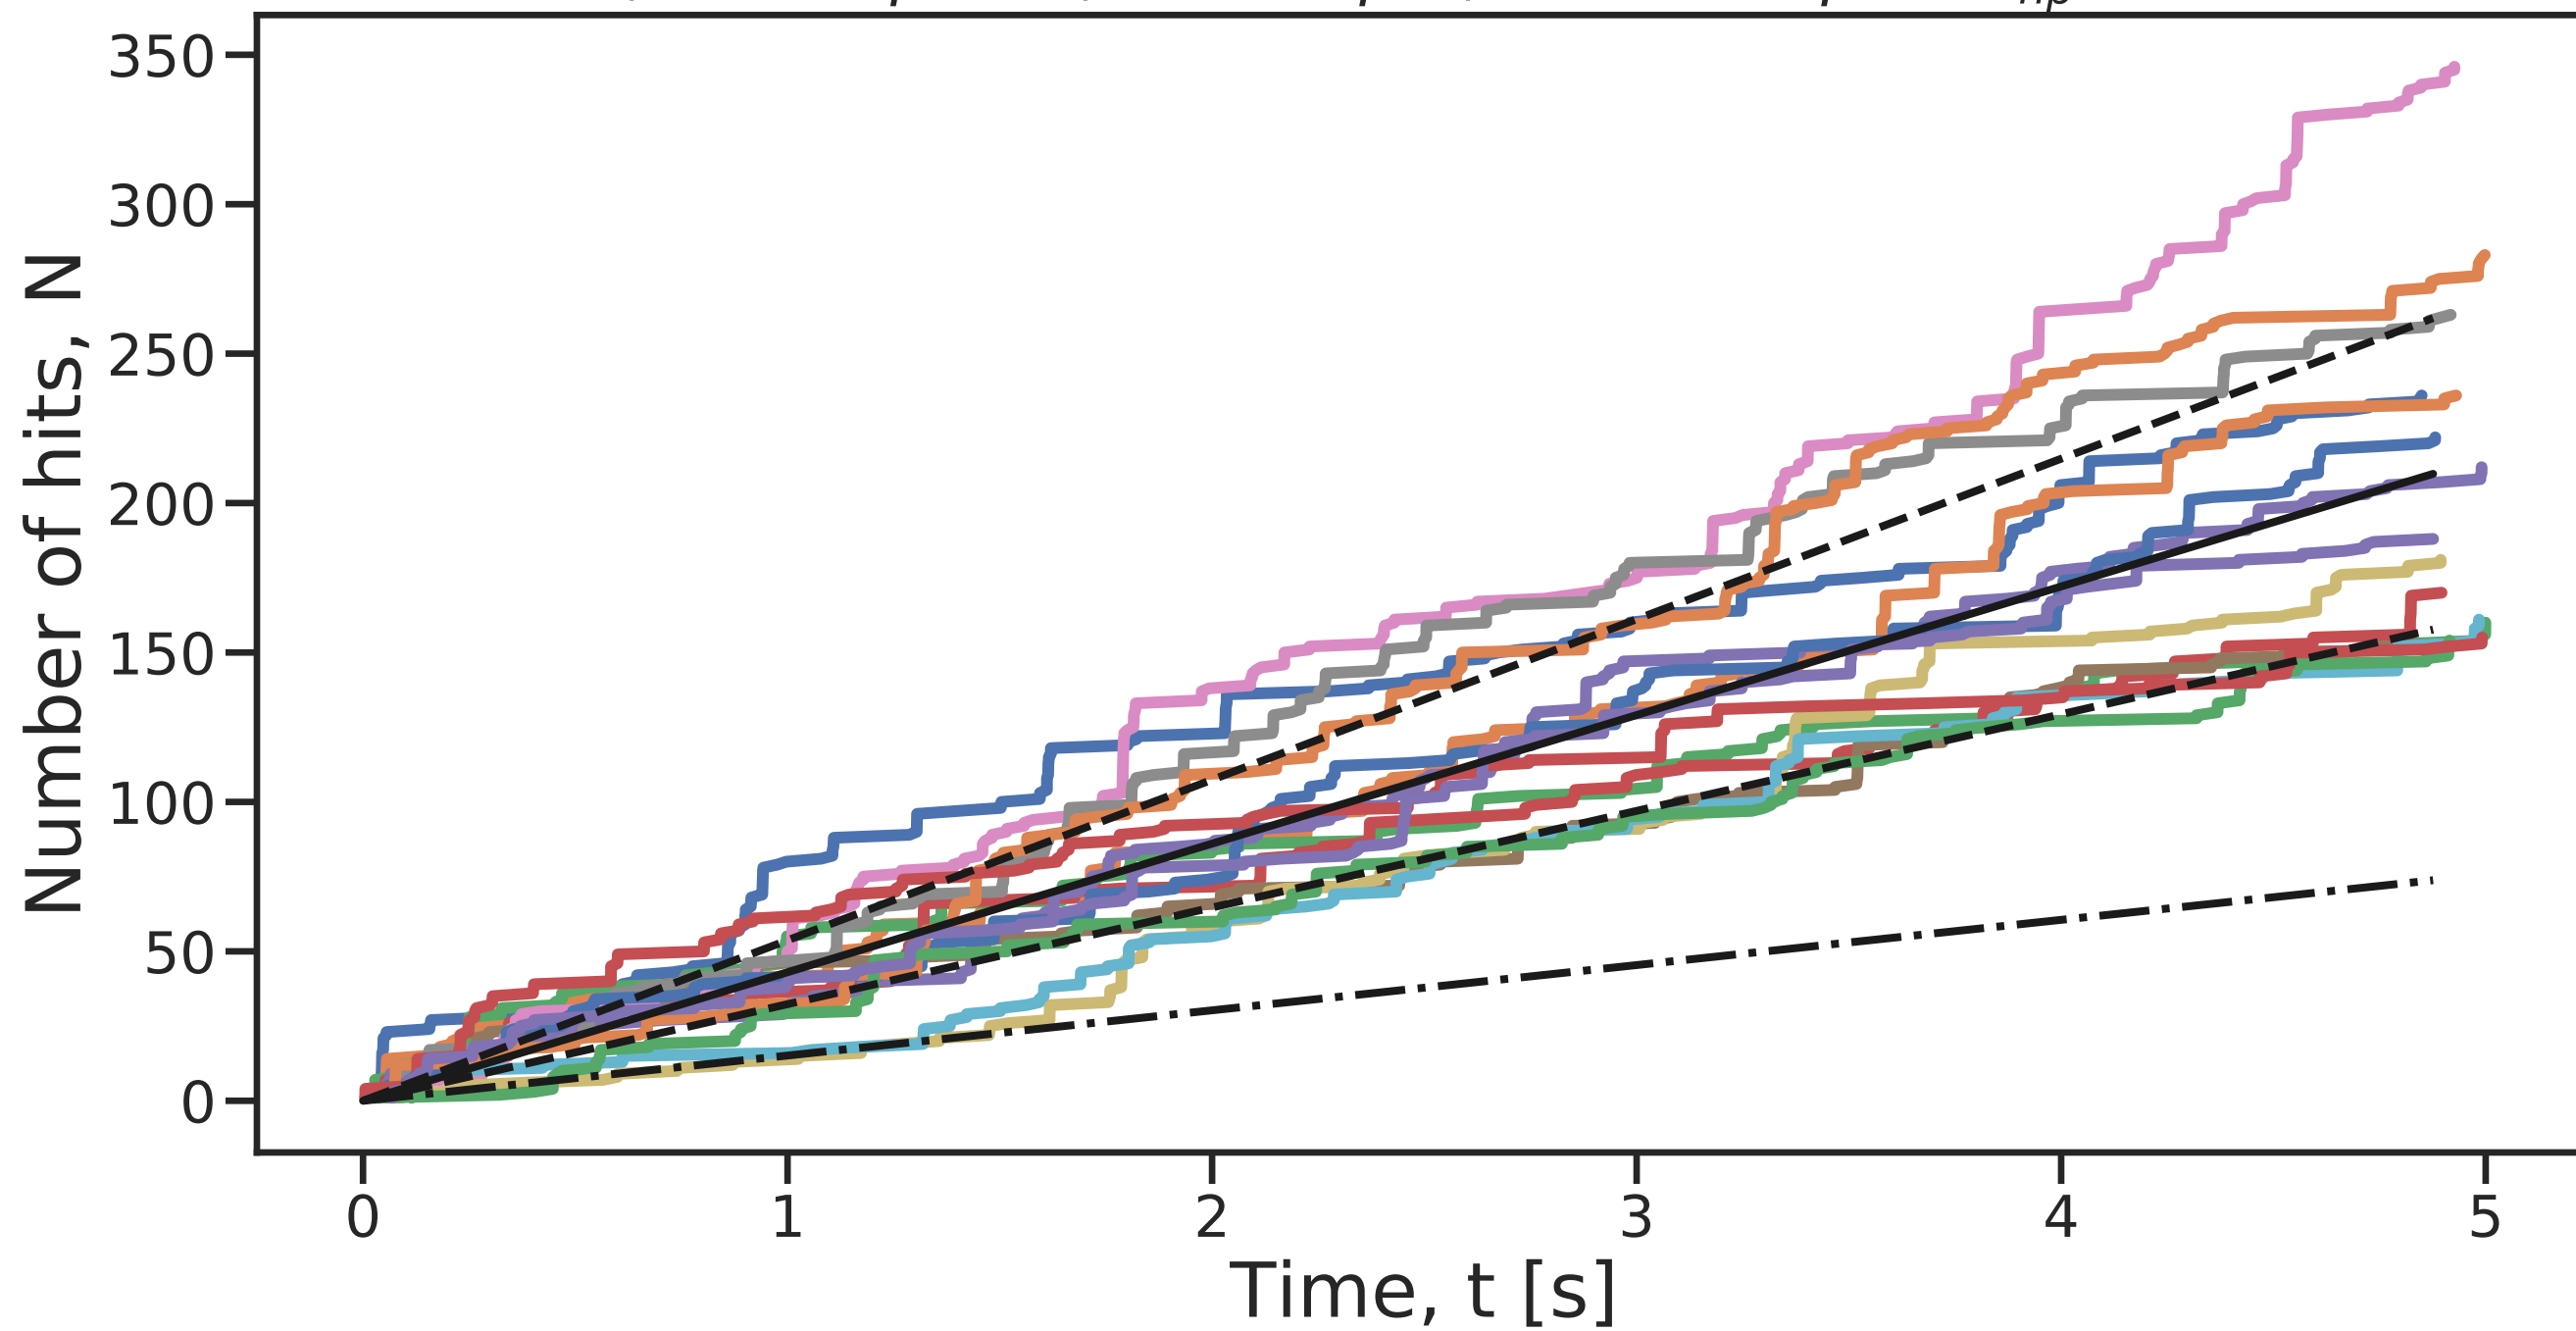

$c = 1.0 \text{ nM}; D = 20 \text{ } \mu\text{m}^2/\text{s}; R = 0.1 \text{ } \mu\text{m}; \Delta t = 2.0 \text{ } \mu\text{s} \langle N_{np} \rangle = 77.5 \pm 13.9$

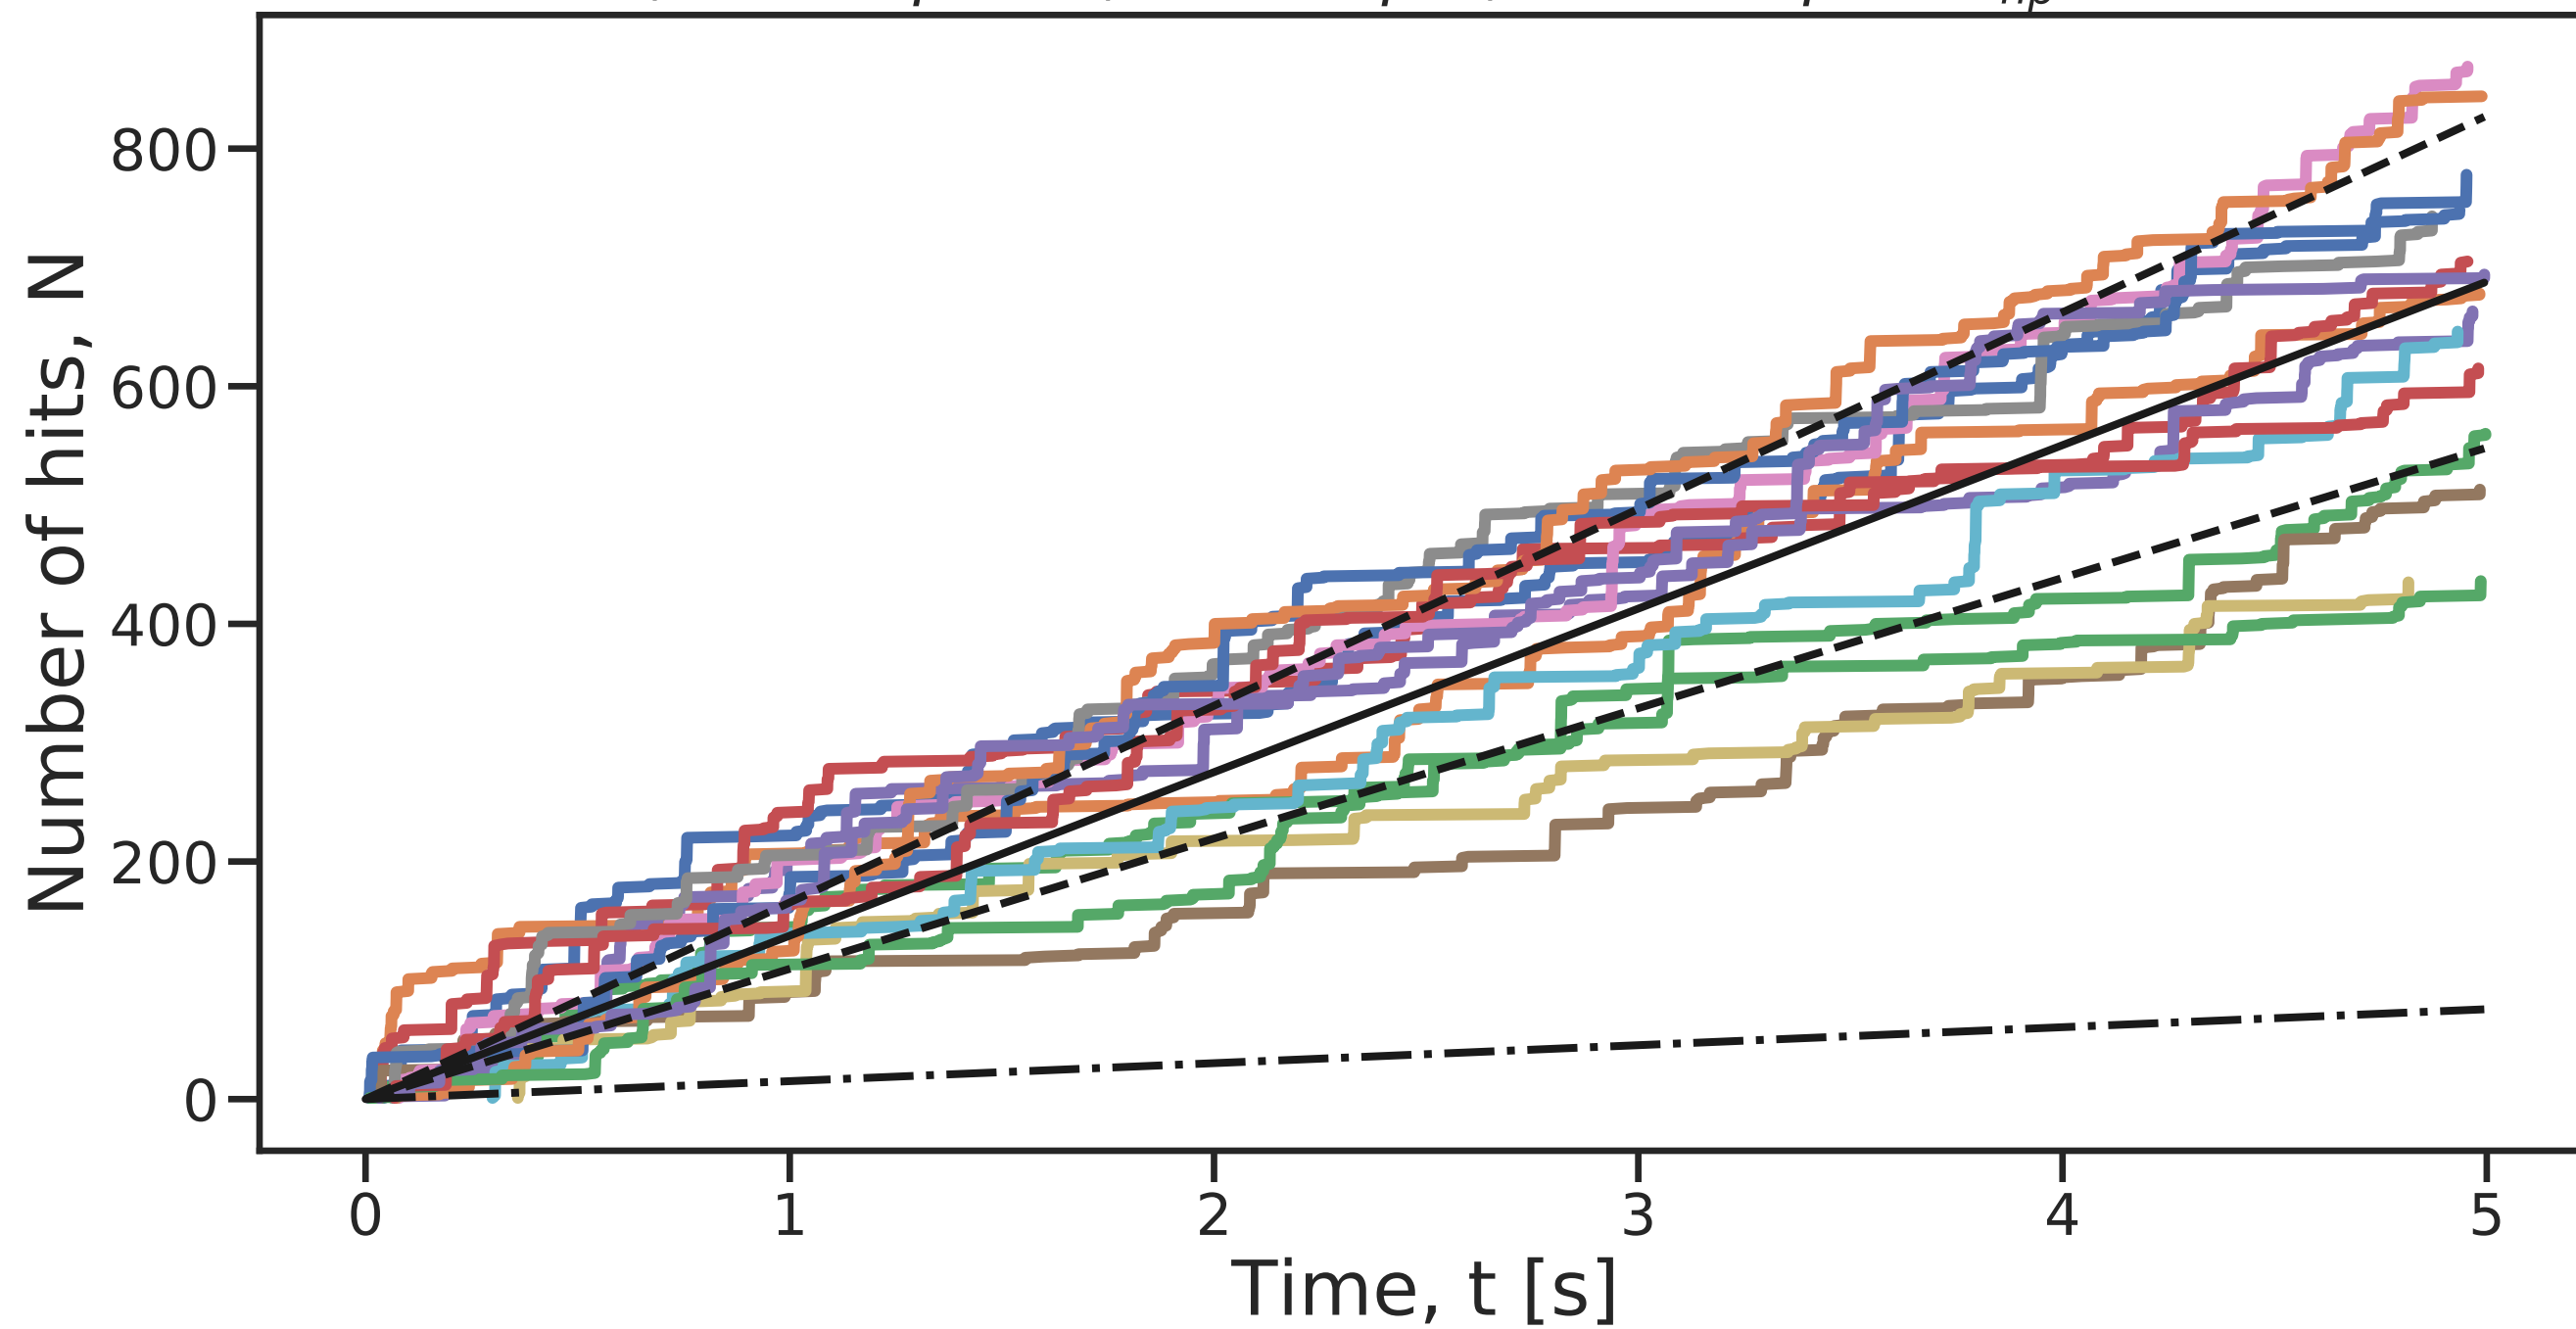

$c = 1.0 \text{ nM}; D = 20 \text{ } \mu\text{m}^2/\text{s}; R = 0.1 \text{ } \mu\text{m}; \Delta t = 40.0 \text{ } \mu\text{s} \langle N_{np} \rangle = 57.8 \pm 13.0$

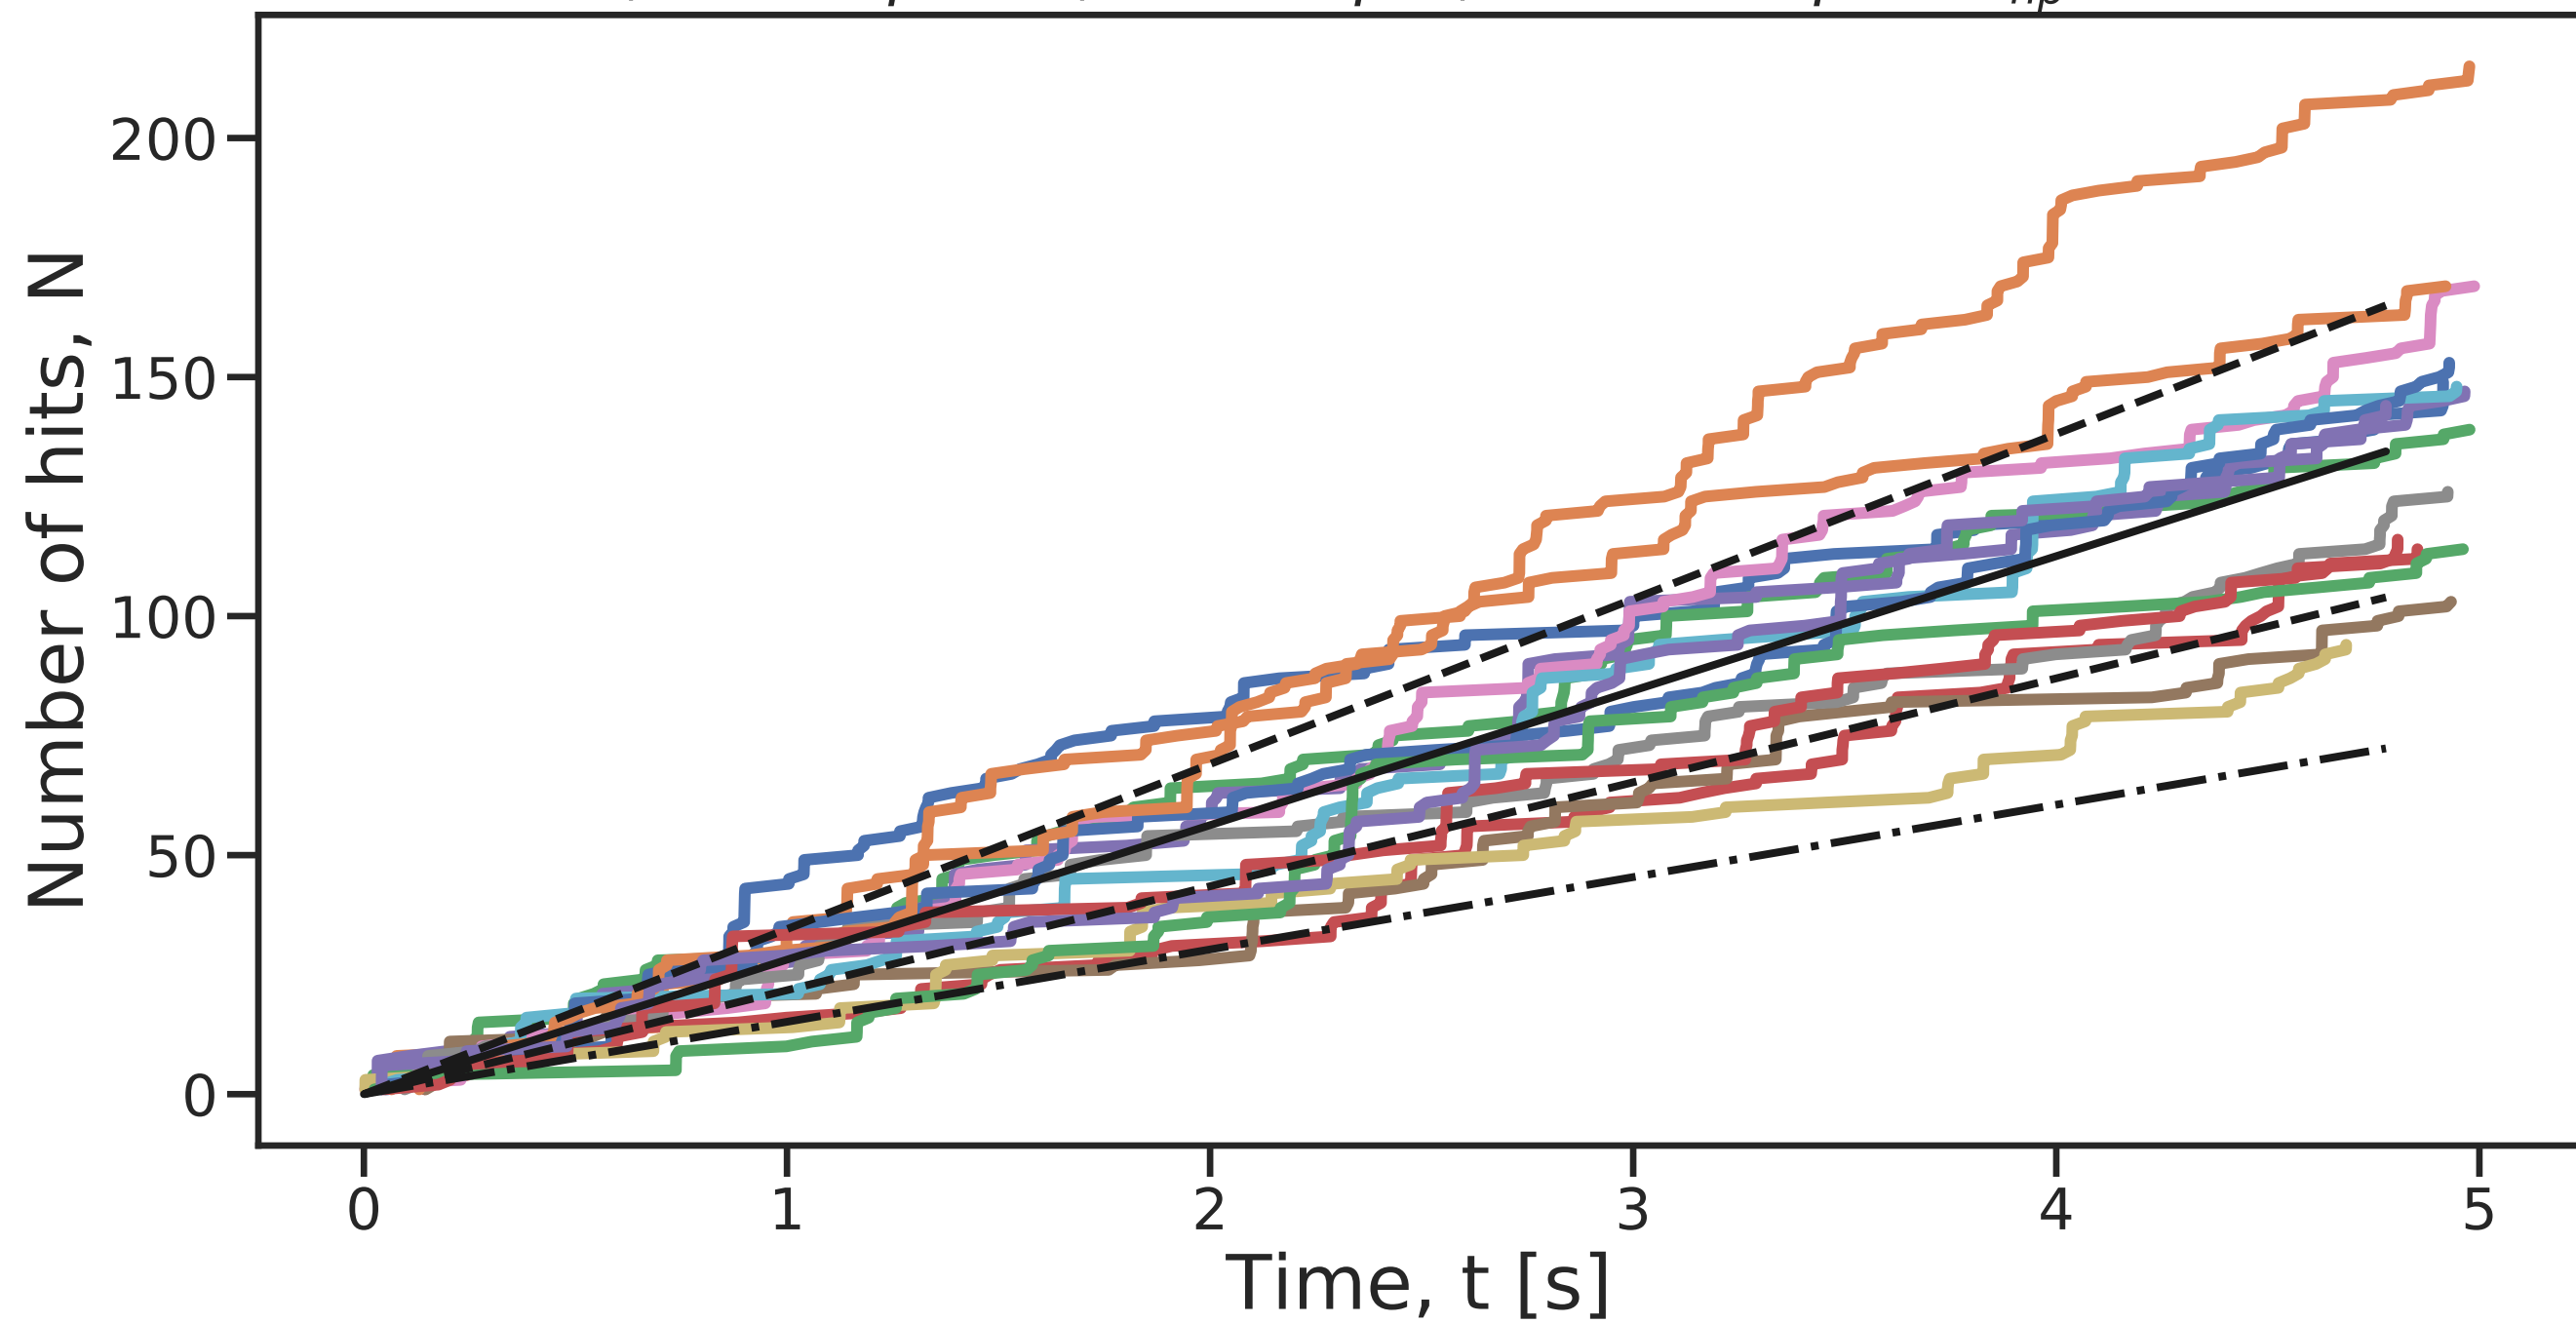



$c = 1.0 \text{ nM}; D = 20 \mu\text{m}^2/\text{s}; R = 0.1 \mu\text{m}; \Delta t = 4.0 \mu\text{s} \langle N_{np} \rangle = 70.8 \pm 16.4$

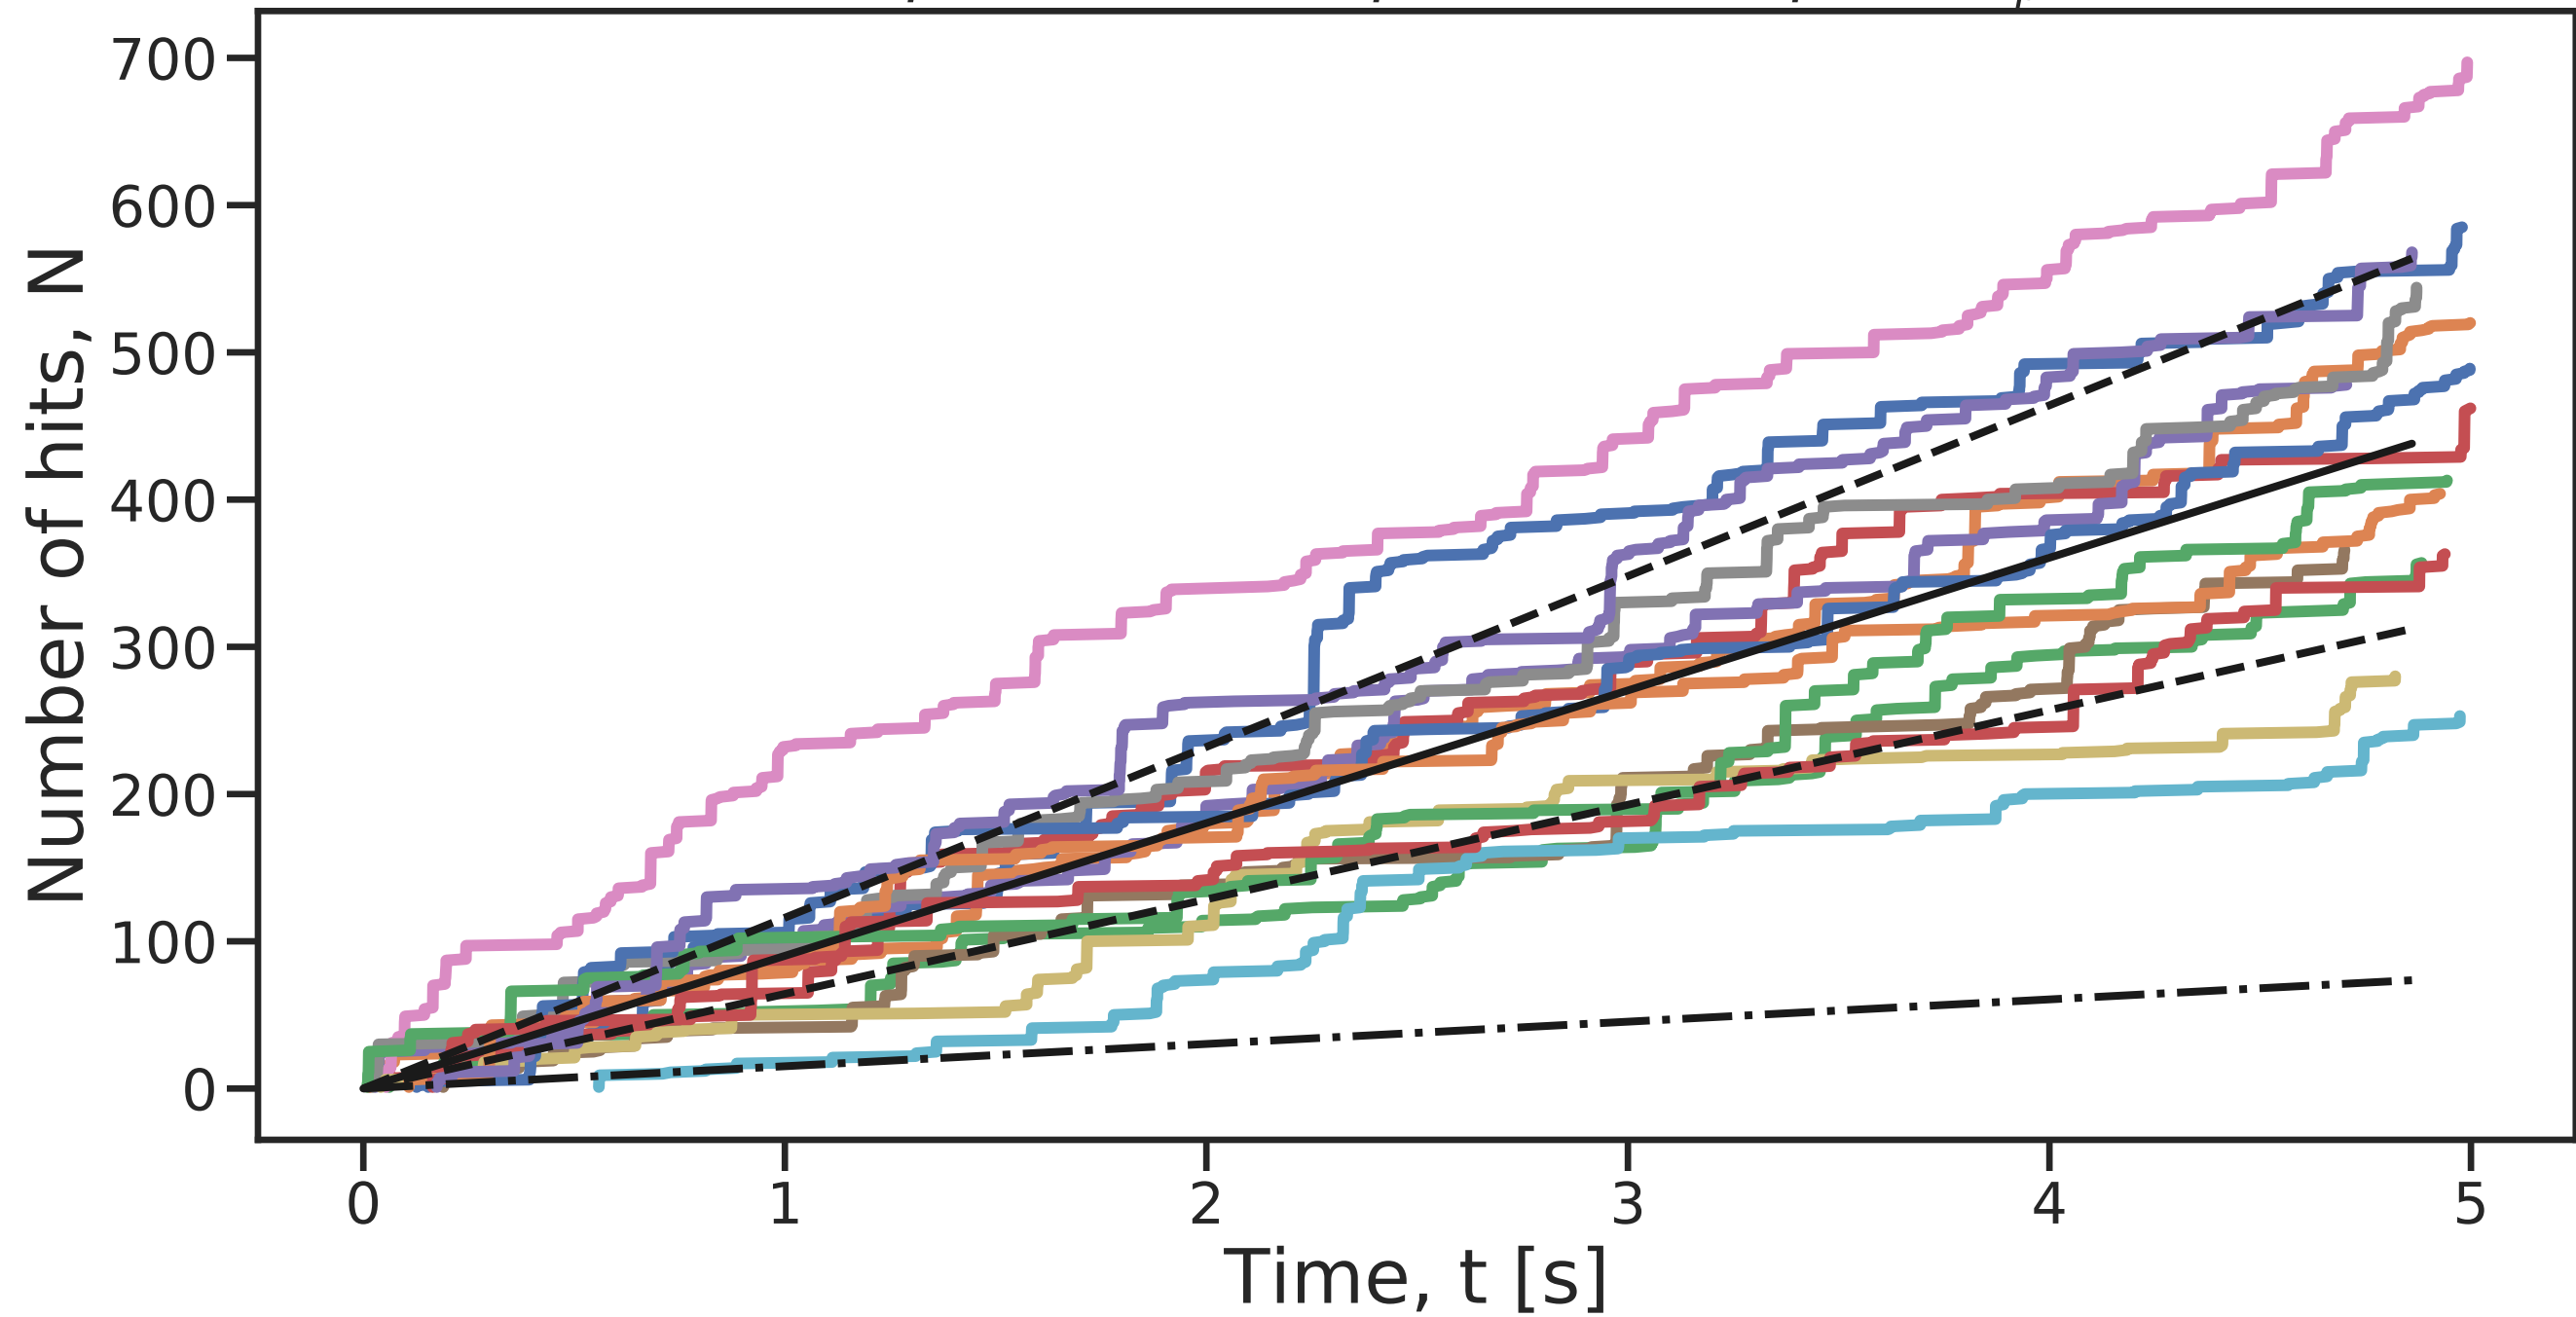

$c = 1.0 \text{ nM}; D = 20 \text{ } \mu\text{m}^2/\text{s}; R = 0.1 \text{ } \mu\text{m}; \Delta t = 60.0 \text{ } \mu\text{s} \langle N_{np} \rangle = 57.5 \pm 10.5$

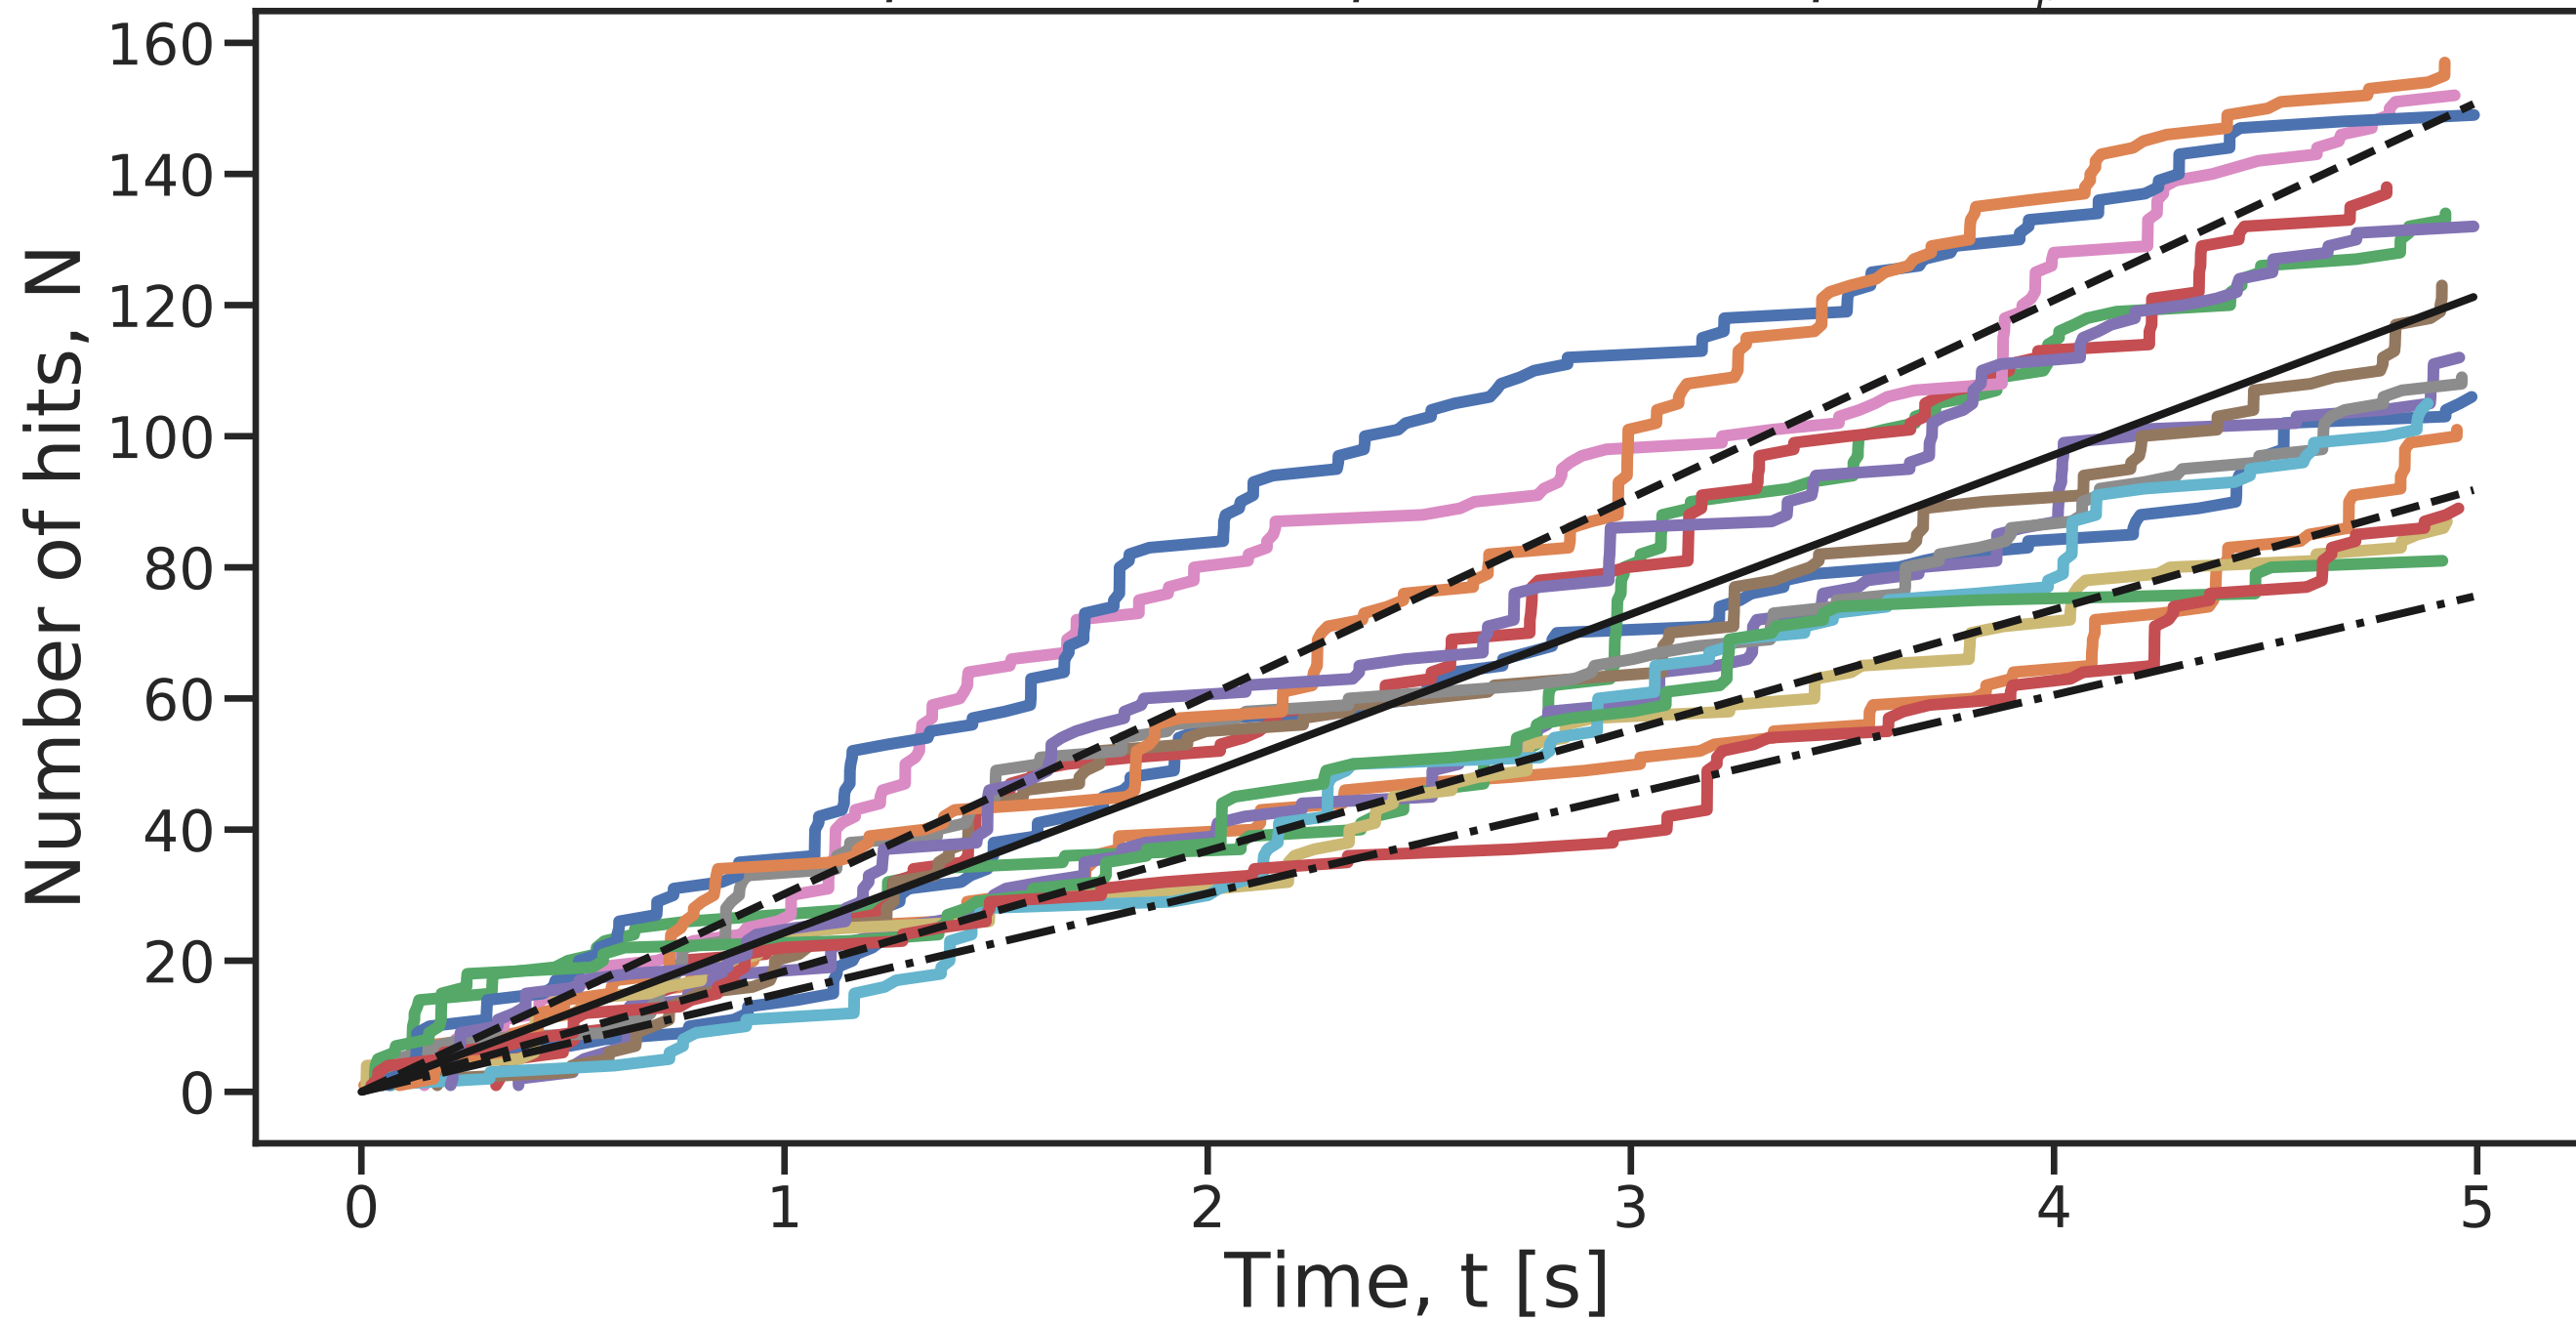

$c = 1.0 \text{ nM}; D = 20 \mu\text{m}^2/\text{s}; R = 0.1 \mu\text{m}; \Delta t = 6.0 \mu\text{s} \langle N_{np} \rangle = 71.7 \pm 11.5$

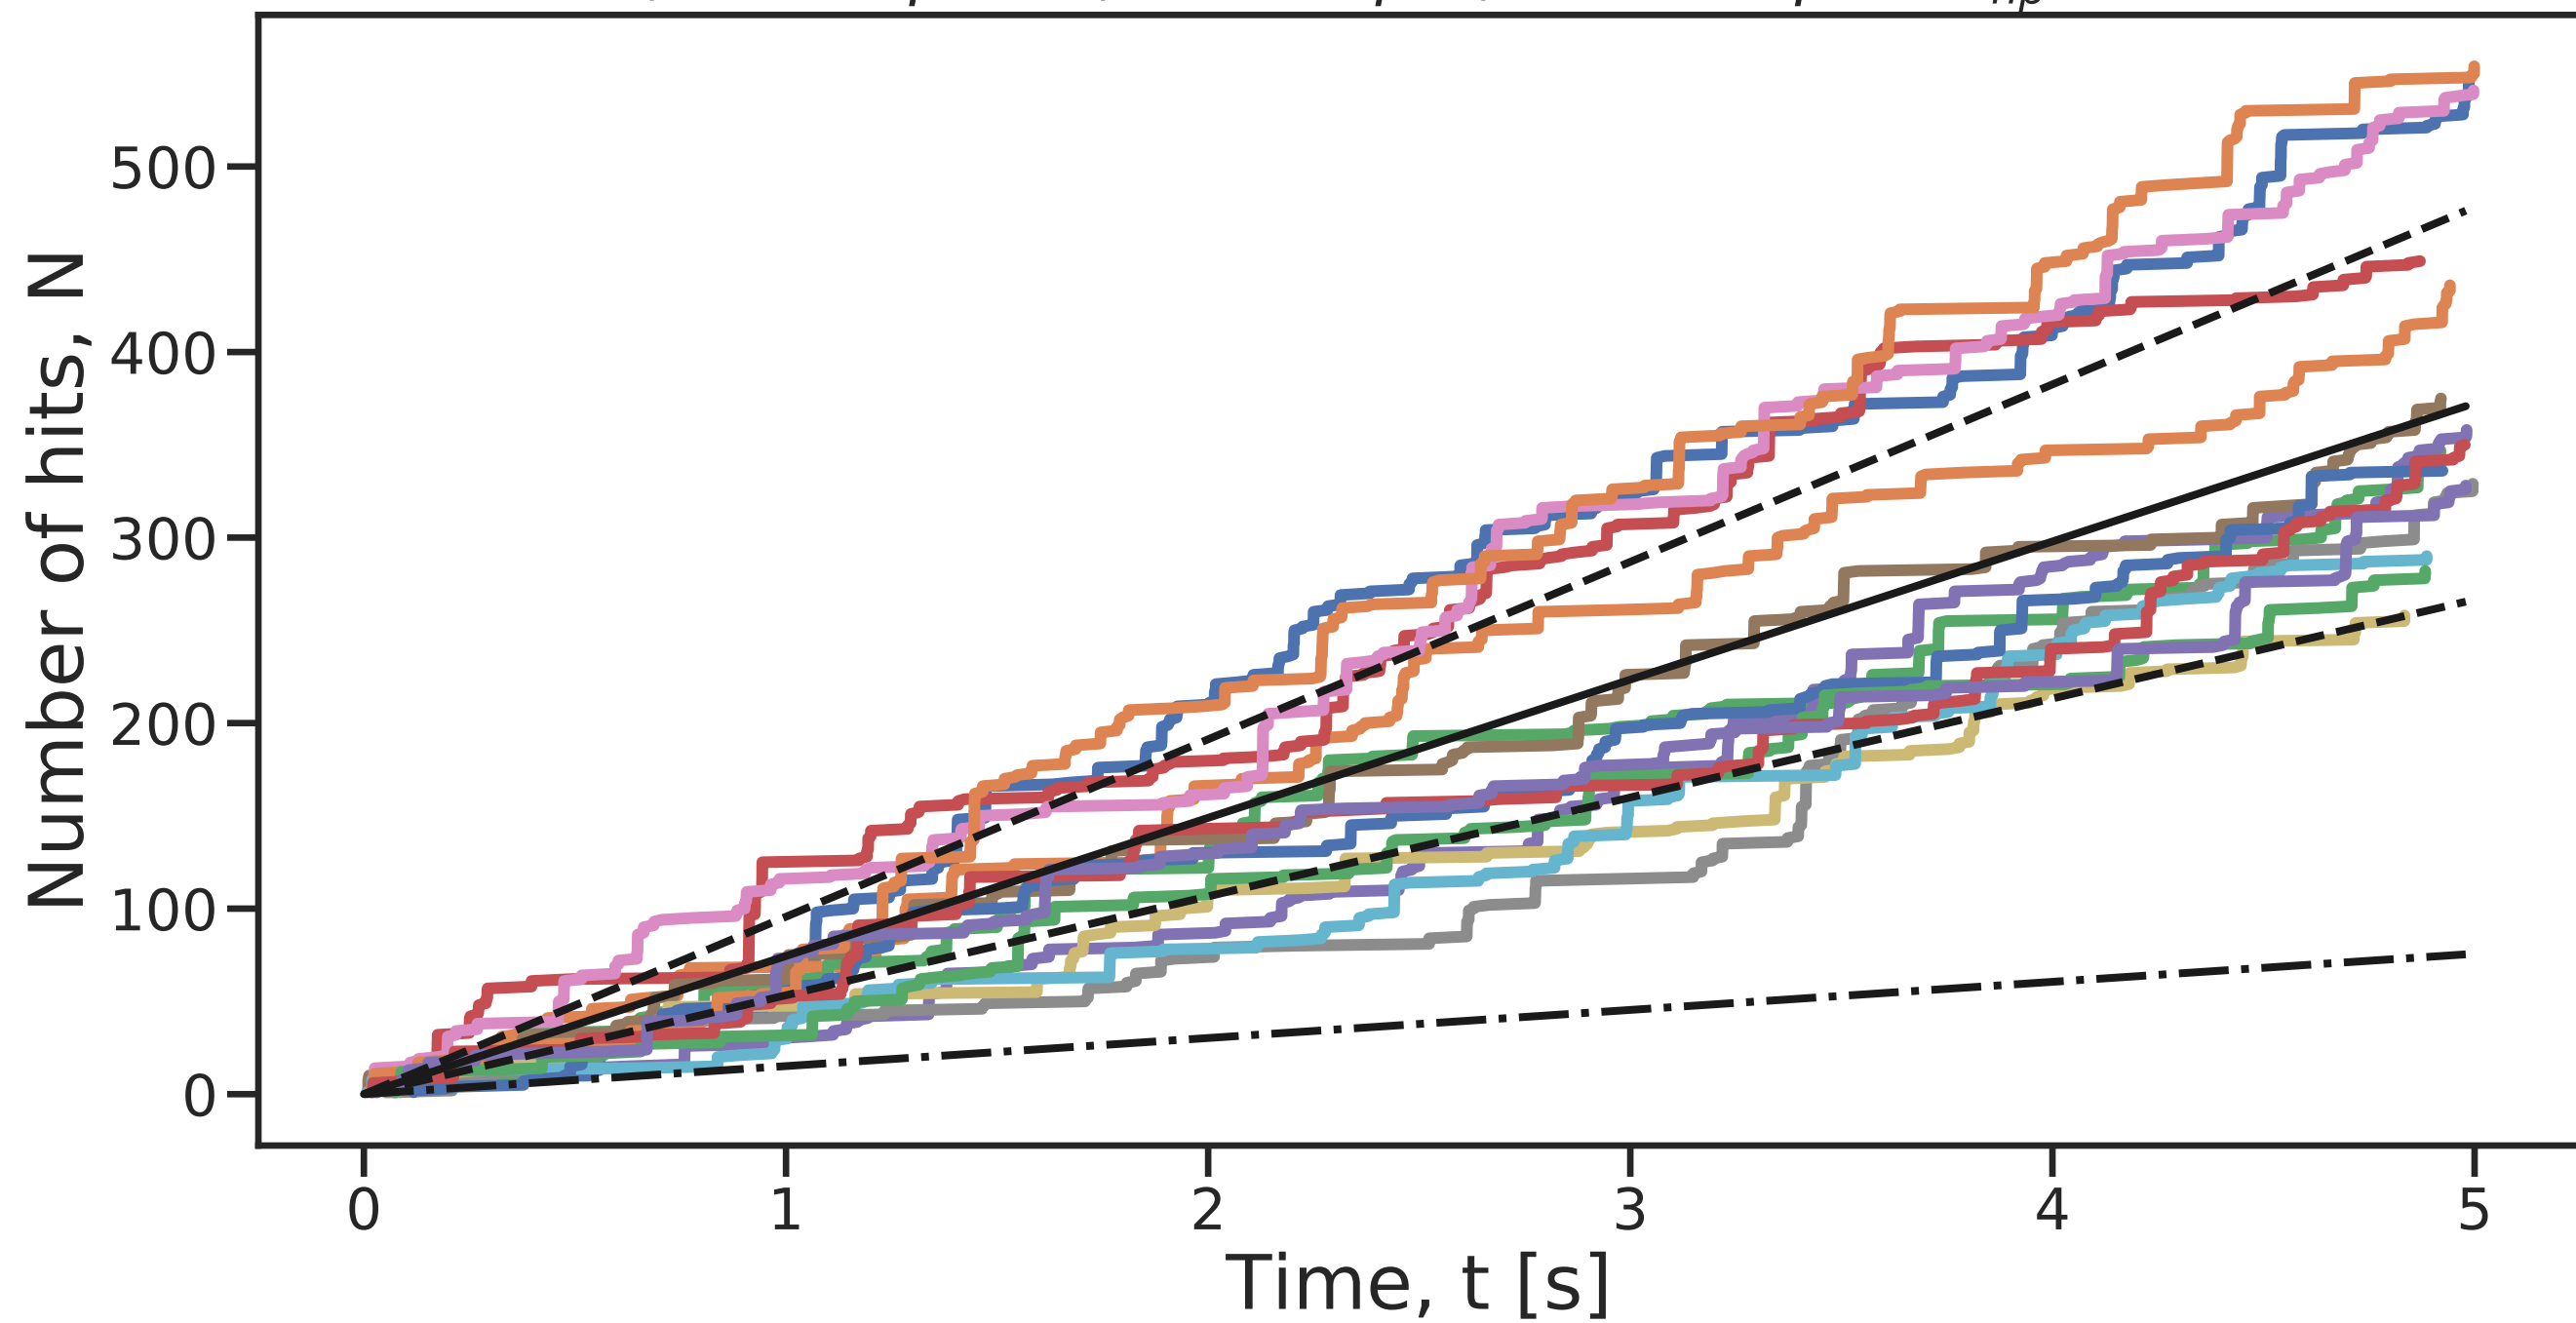

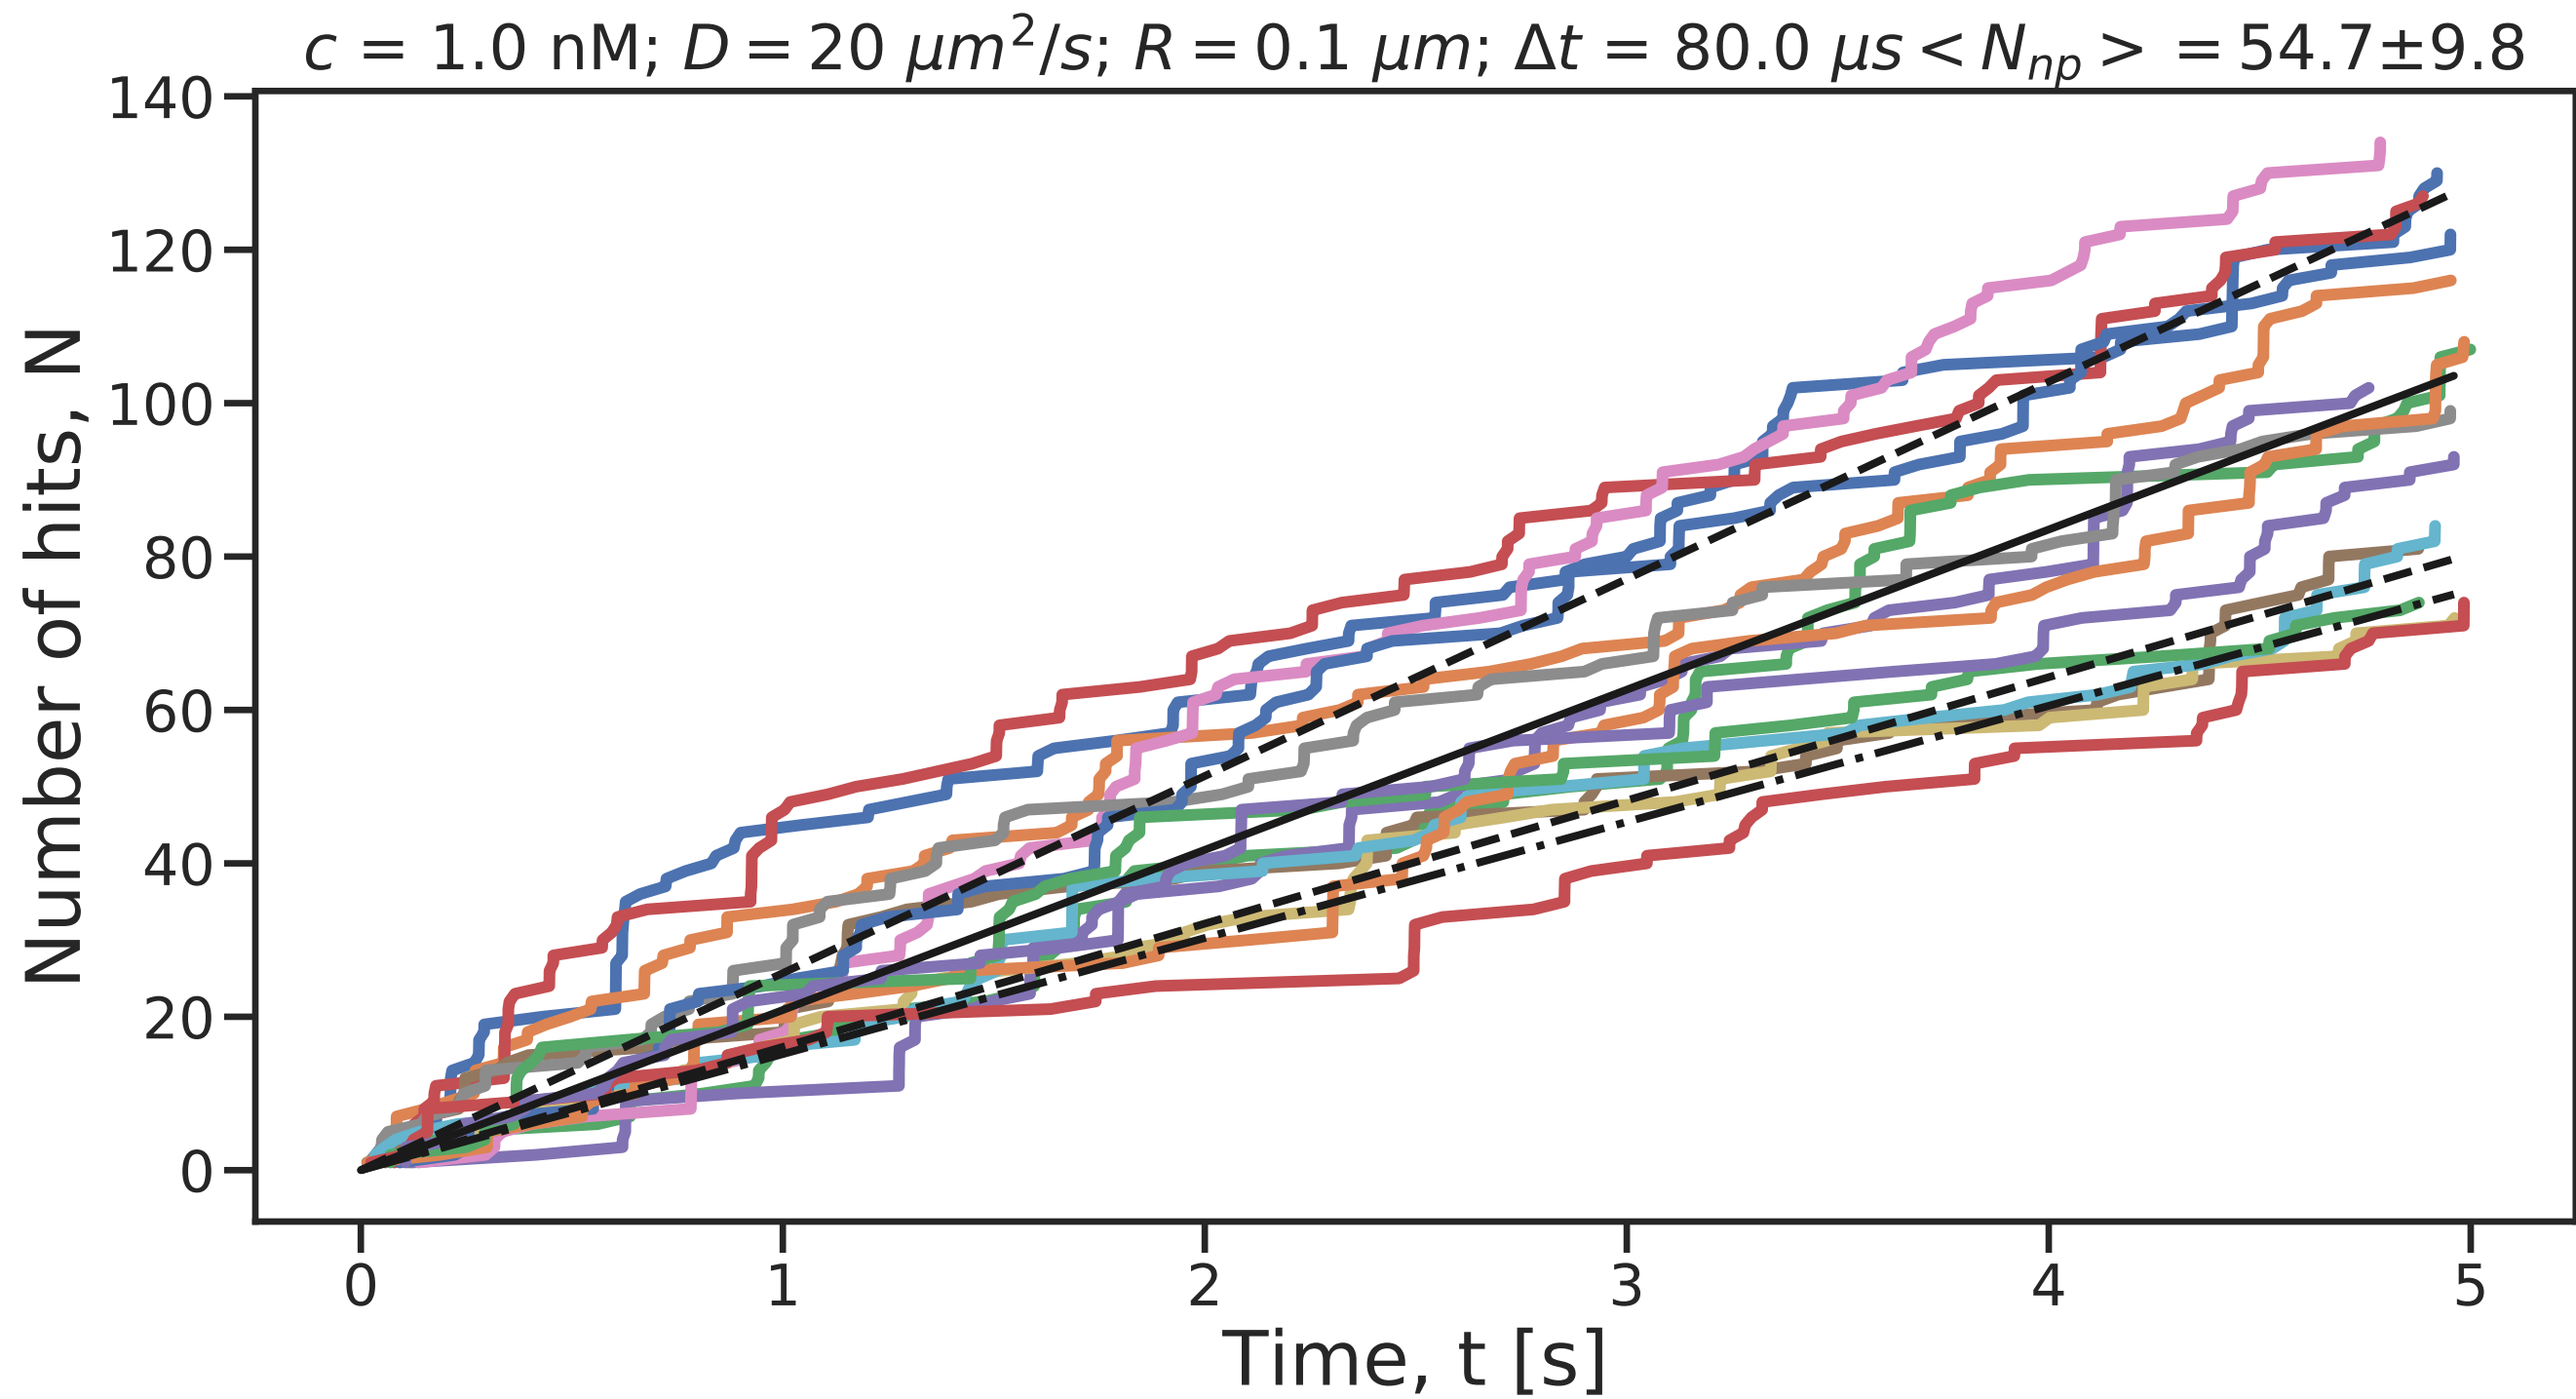

$c = 1.0 \text{ nM}; D = 20 \mu\text{m}^2/\text{s}; R = 0.1 \mu\text{m}; \Delta t = 8.0 \mu\text{s} \langle N_{np} \rangle = 65.5 \pm 13.4$

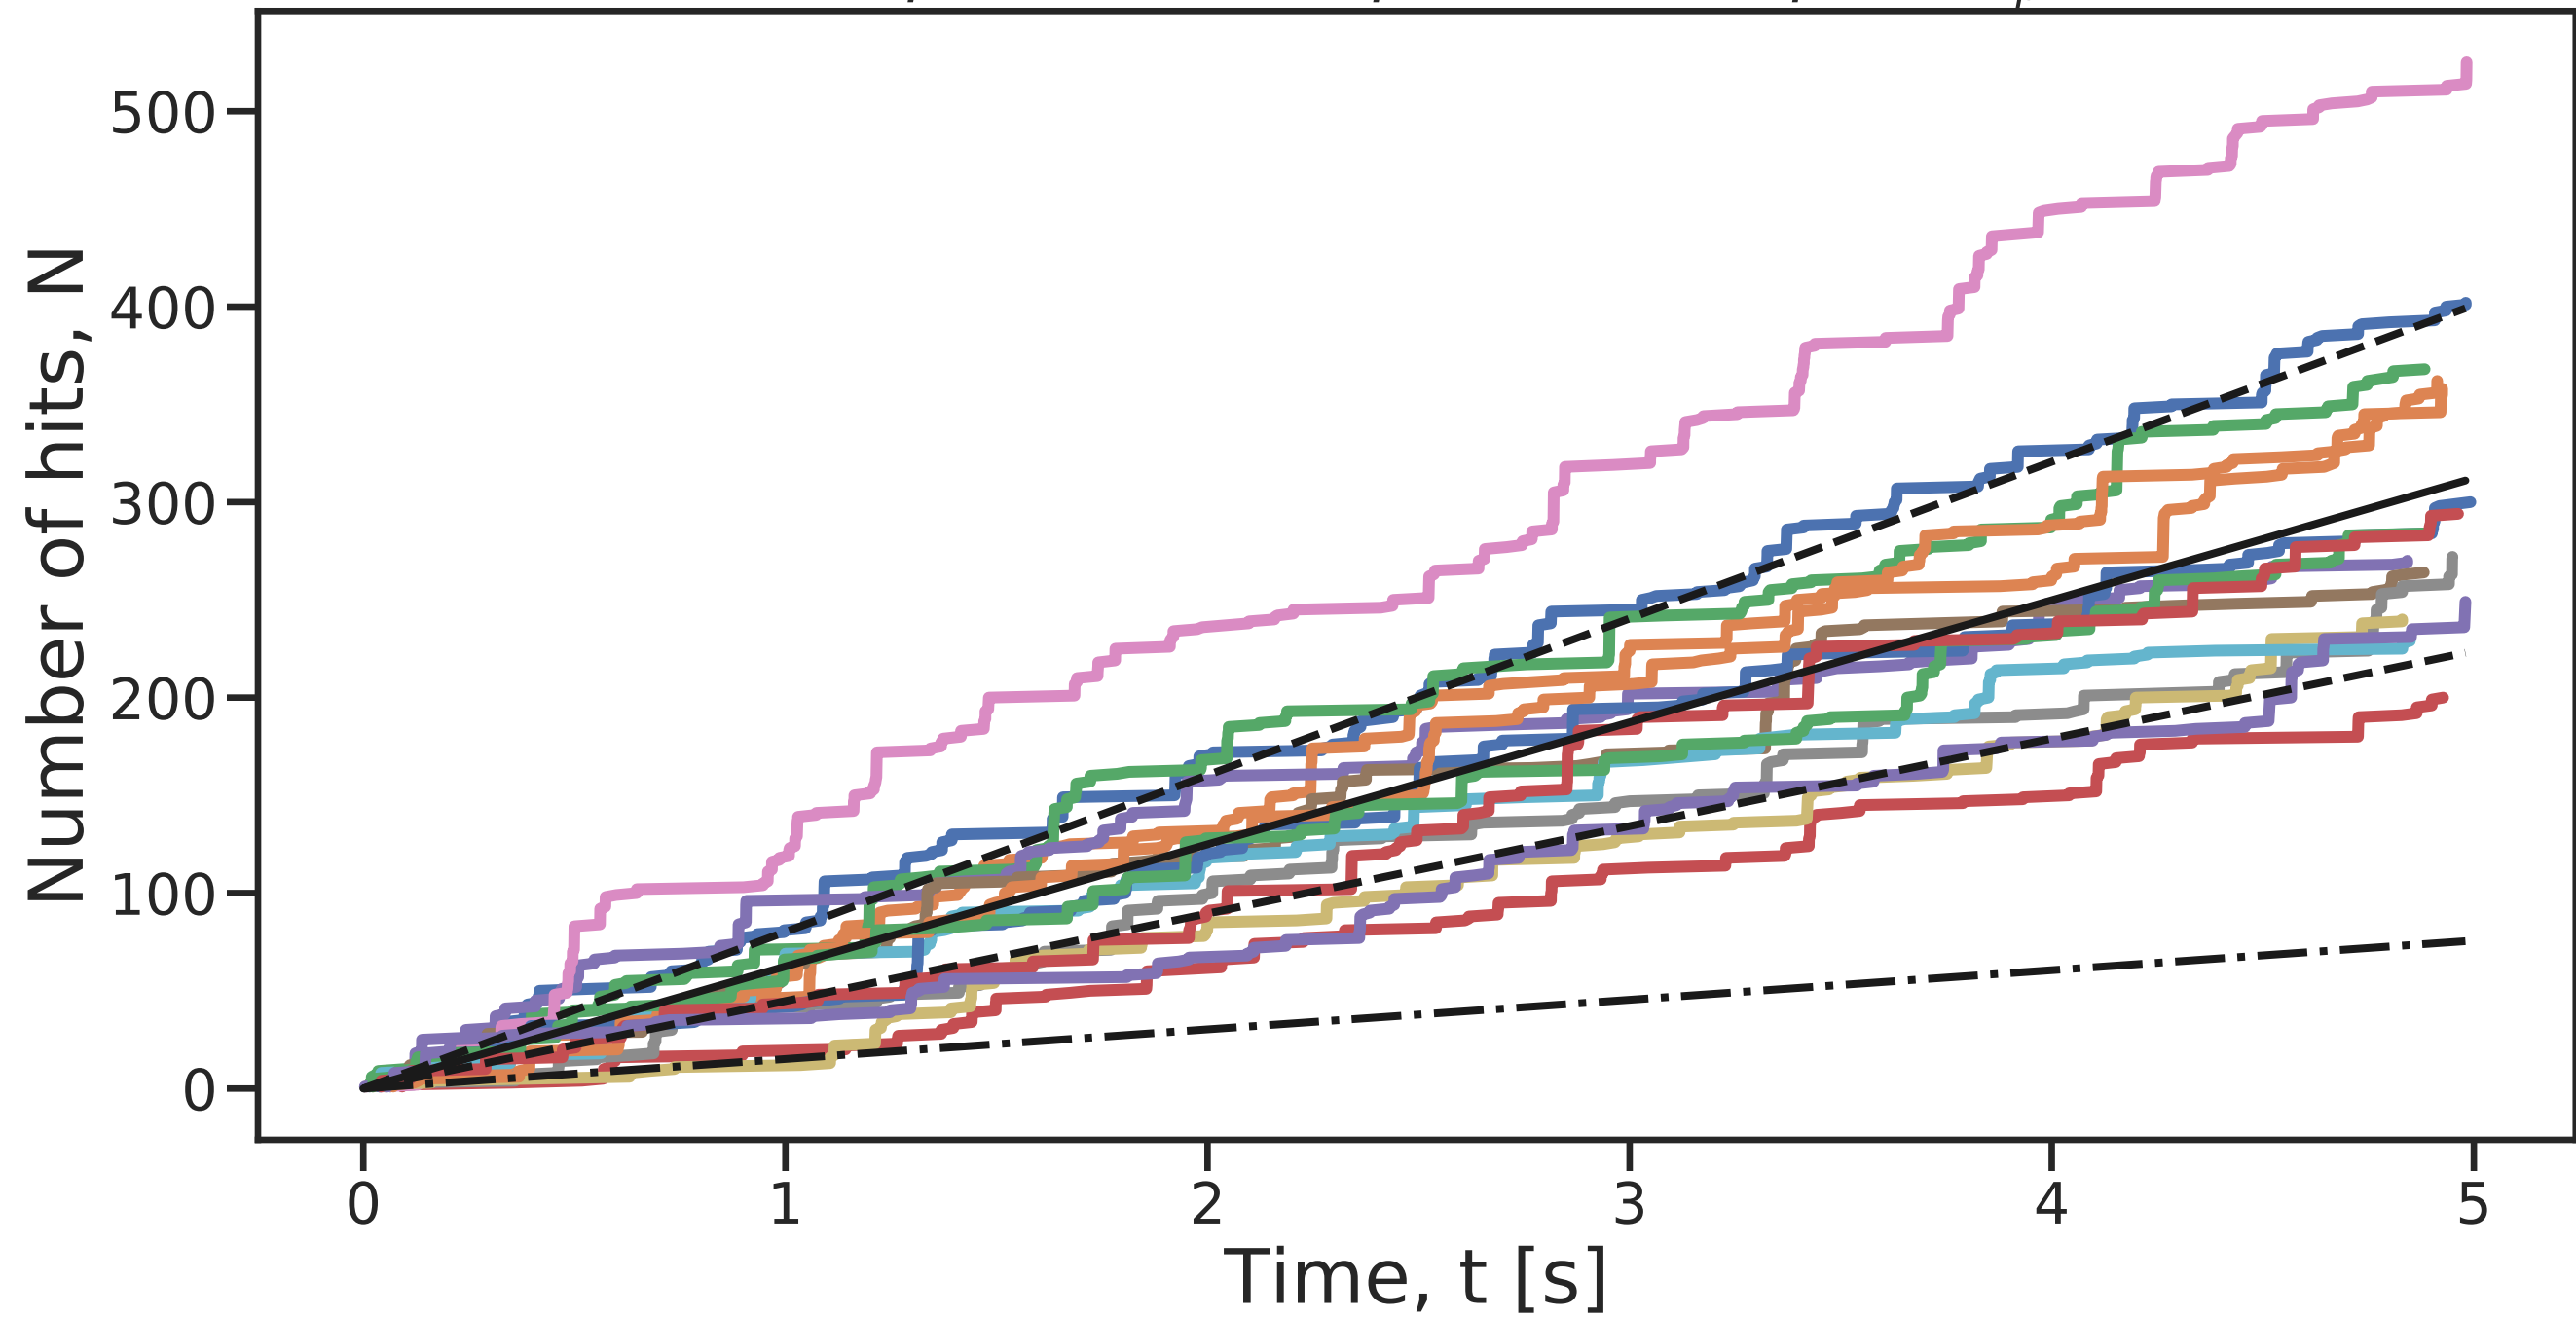

$c = 1.0 \text{ nM}$ ;  $D = 2 \text{ } \mu\text{m}^2/\text{s}$ ;  $R = 0.1 \text{ } \mu\text{m}$ ;  $\Delta t = 1.0 \text{ } \mu\text{s}$   $\langle N_{np} \rangle = 43.9 \pm 10.3$

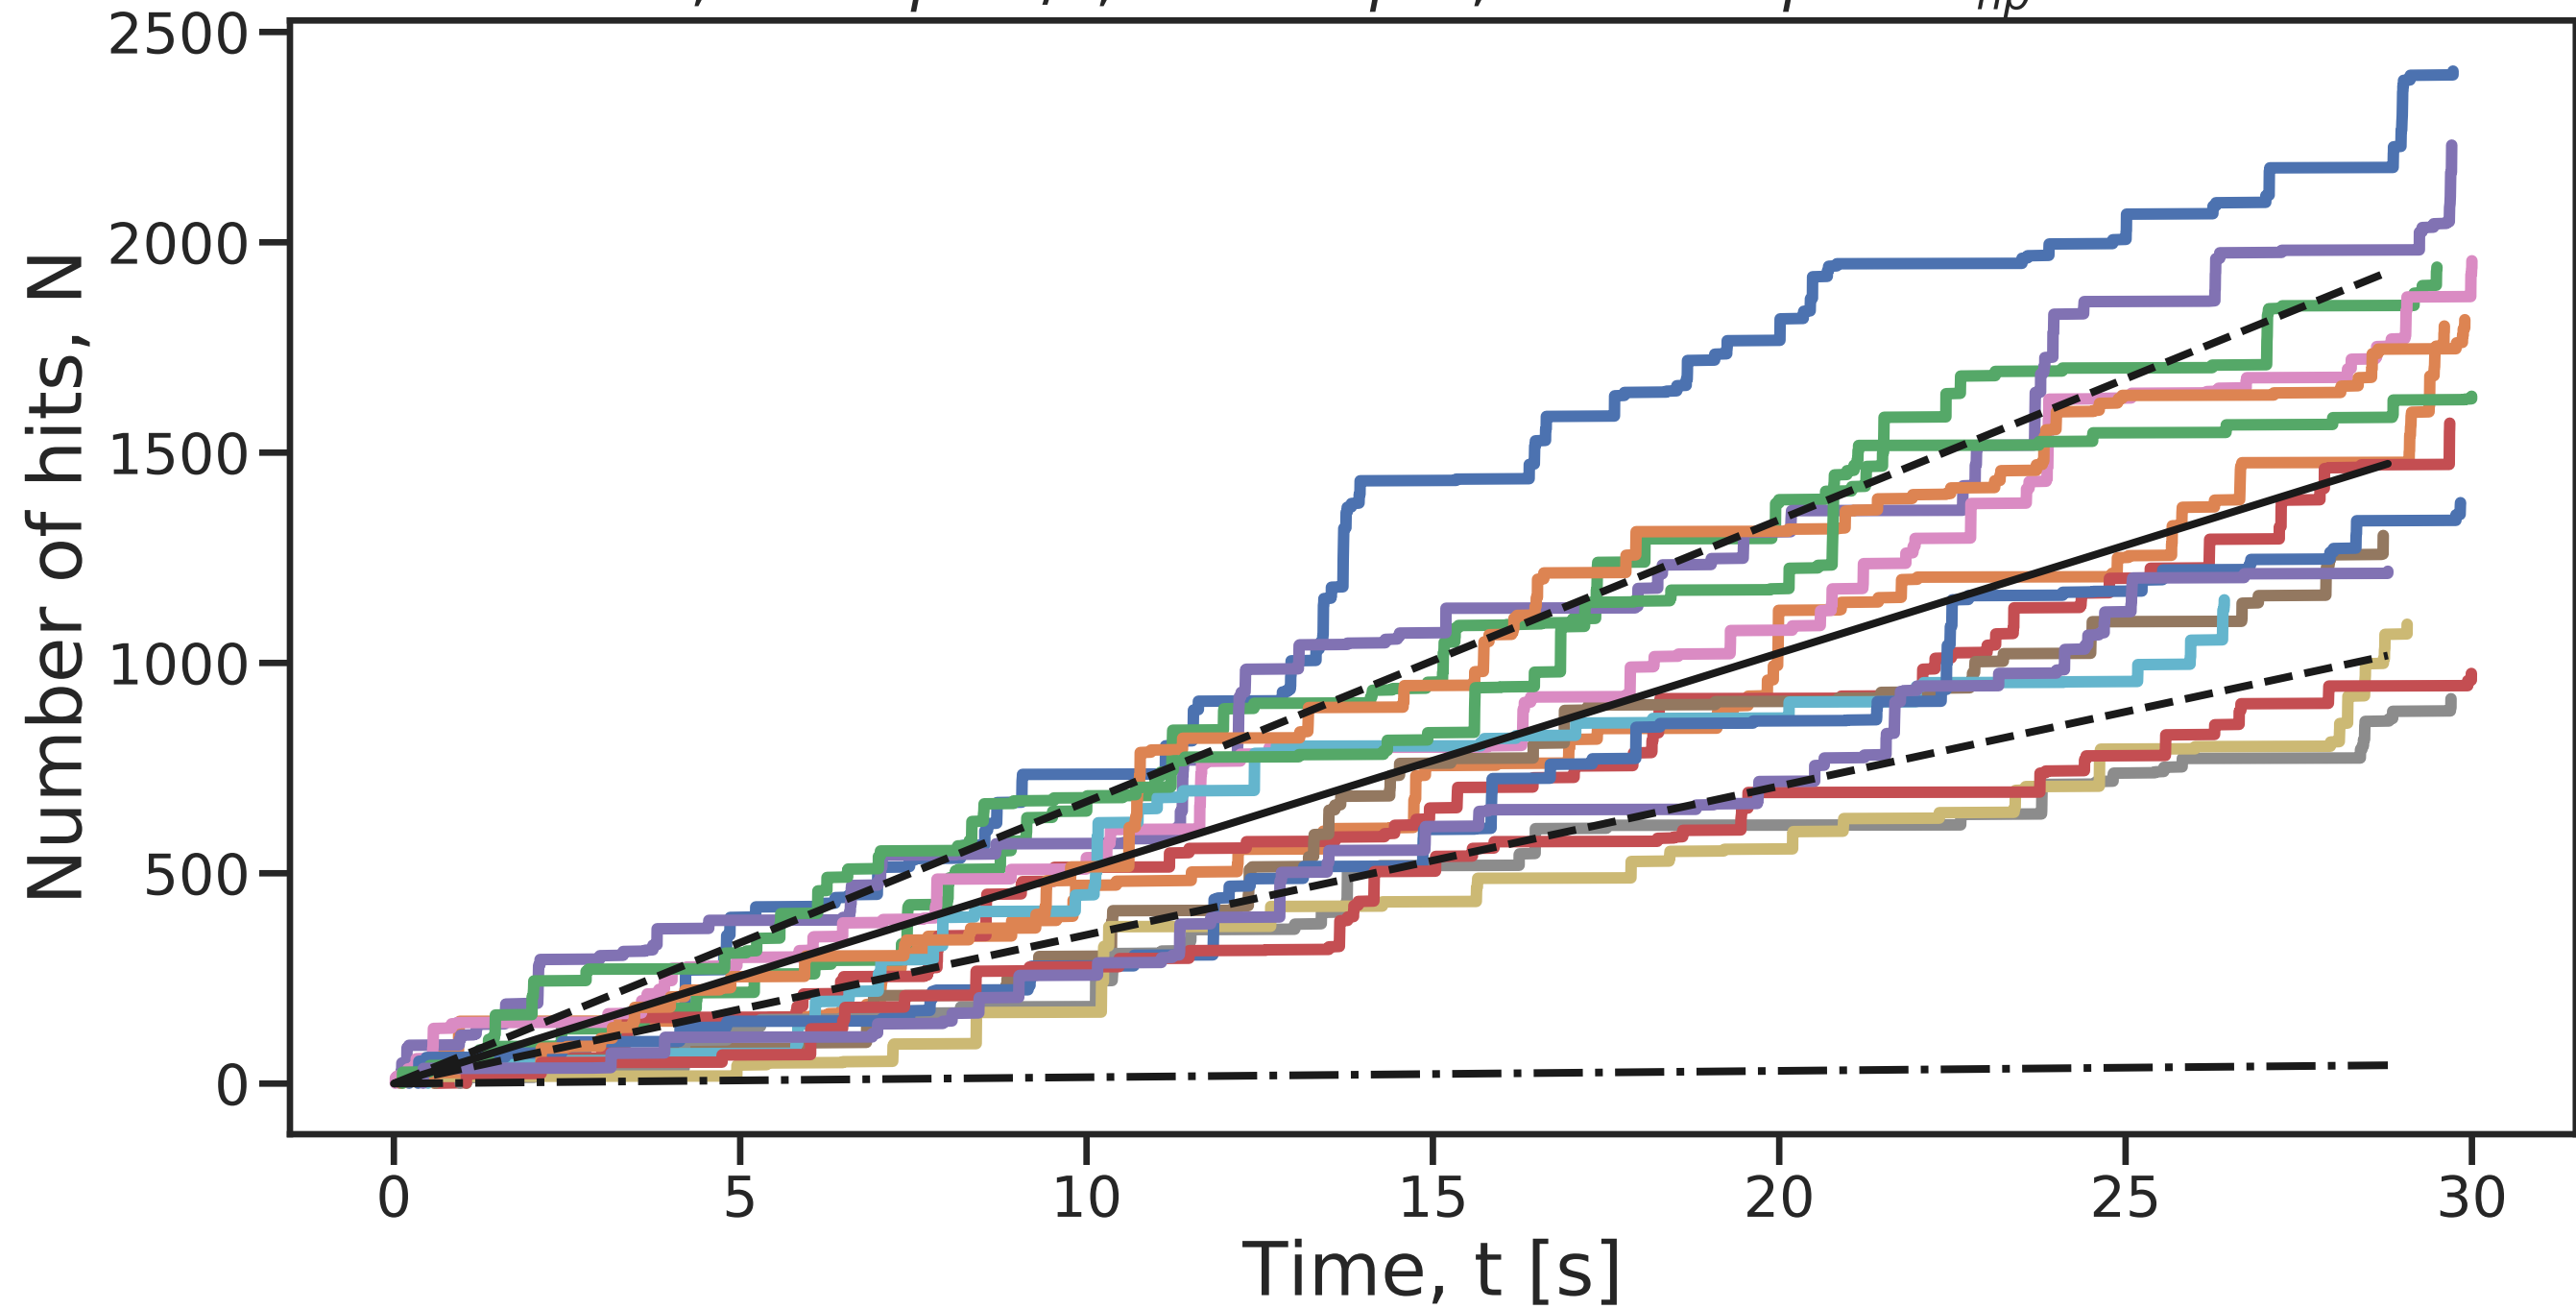

$c = 1.0 \text{ nM}$ ;  $D = 320 \text{ } \mu\text{m}^2/\text{s}$ ;  $R = 0.1 \text{ } \mu\text{m}$ ;  $\Delta t = 1.0 \text{ } \mu\text{s}$   $\langle N_{np} \rangle = 1095.3 \pm 184.9$

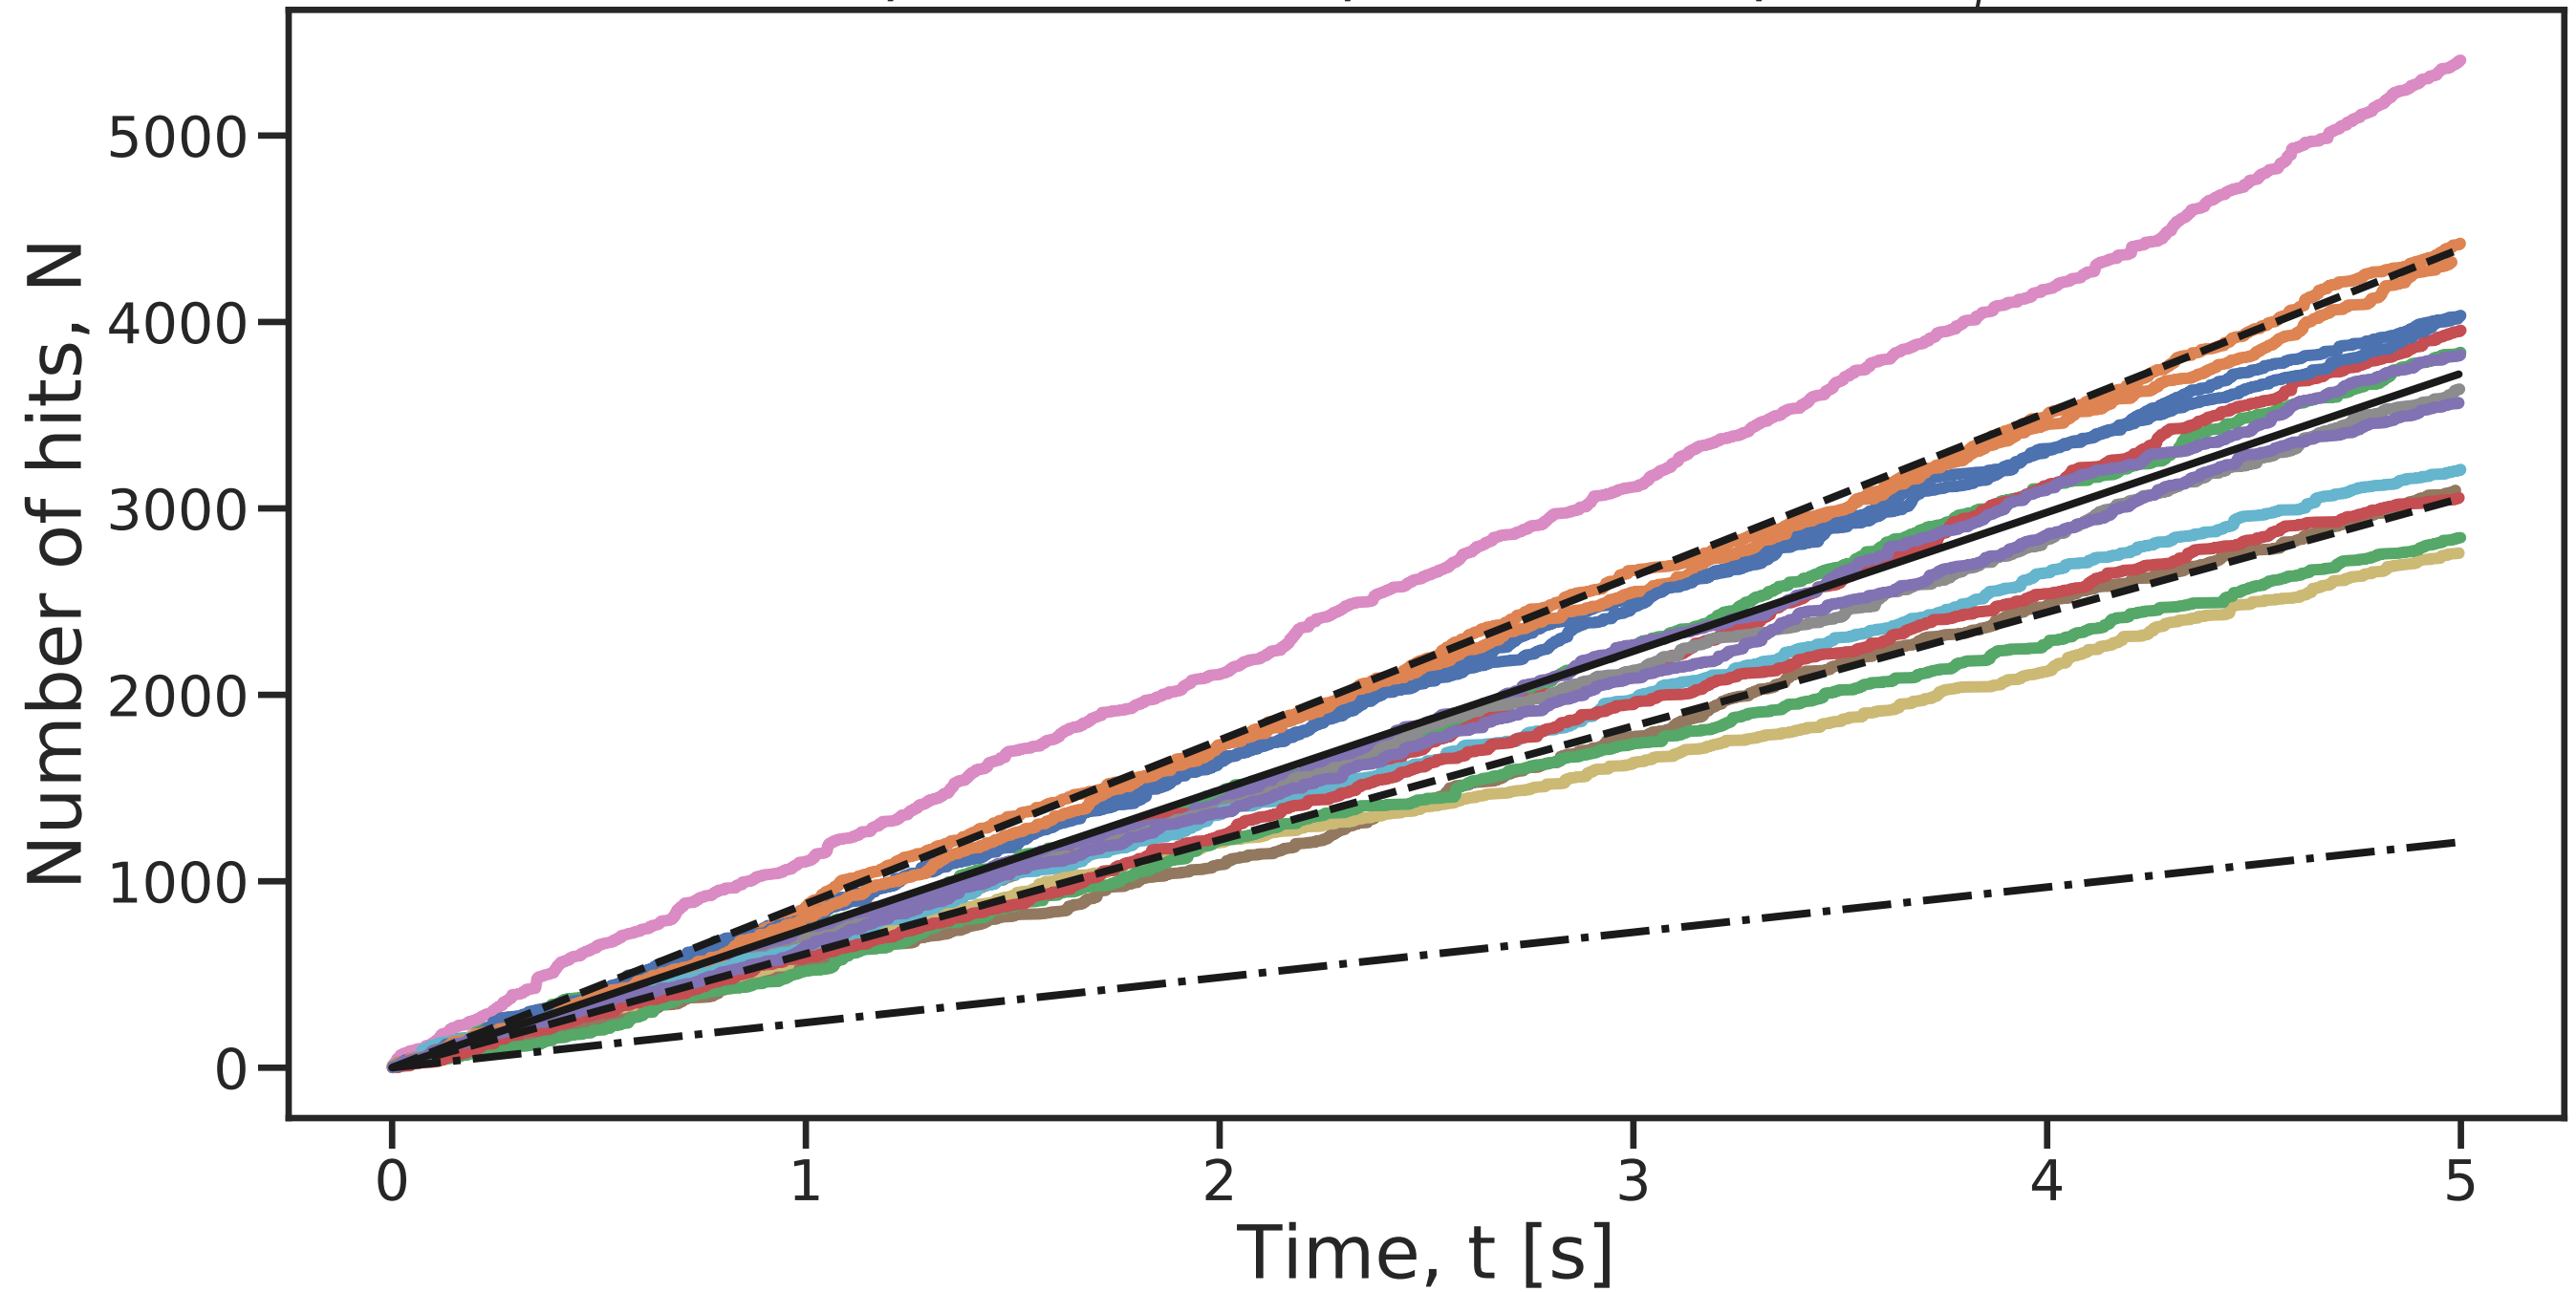

$c = 1.0 \text{ nM}$ ;  $D = 40 \text{ } \mu\text{m}^2/\text{s}$ ;  $R = 0.1 \text{ } \mu\text{m}$ ;  $\Delta t = 1.0 \text{ } \mu\text{s}$   $\langle N_{np} \rangle = 151.3 \pm 30.3$

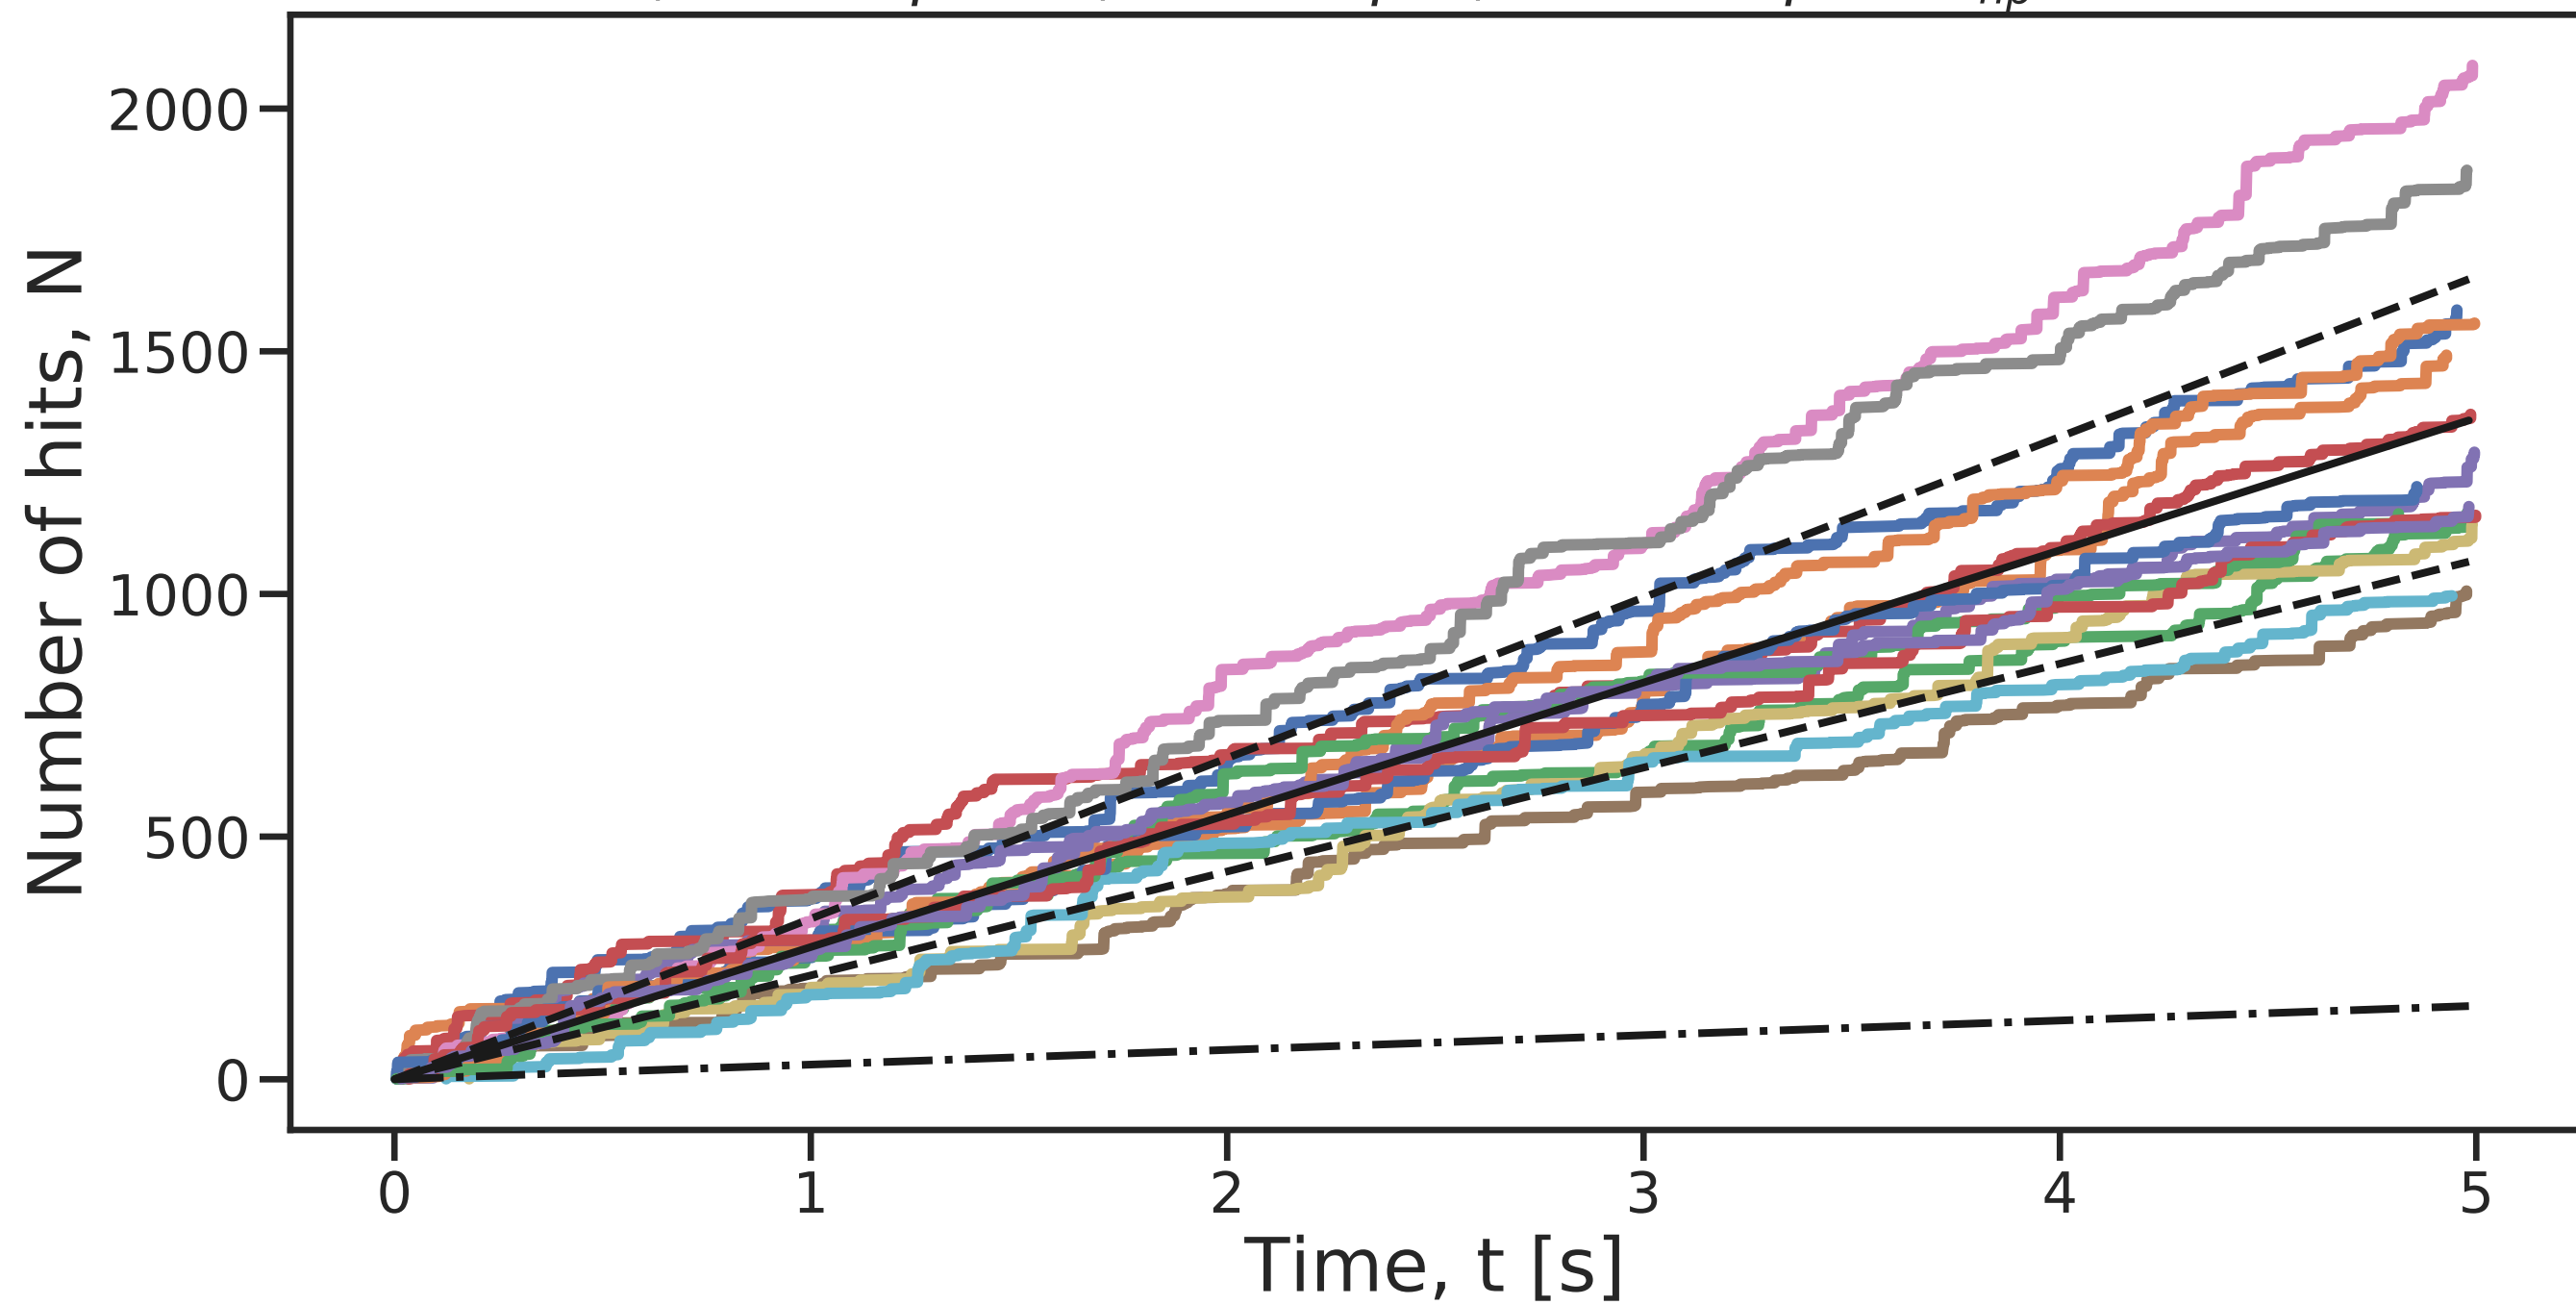



$c = 1.0 \text{ nM}; D = 5 \text{ } \mu\text{m}^2/\text{s}; R = 0.1 \text{ } \mu\text{m}; \Delta t = 1.0 \text{ } \mu\text{s} \langle N_{np} \rangle = 40.0 \pm 7.6$

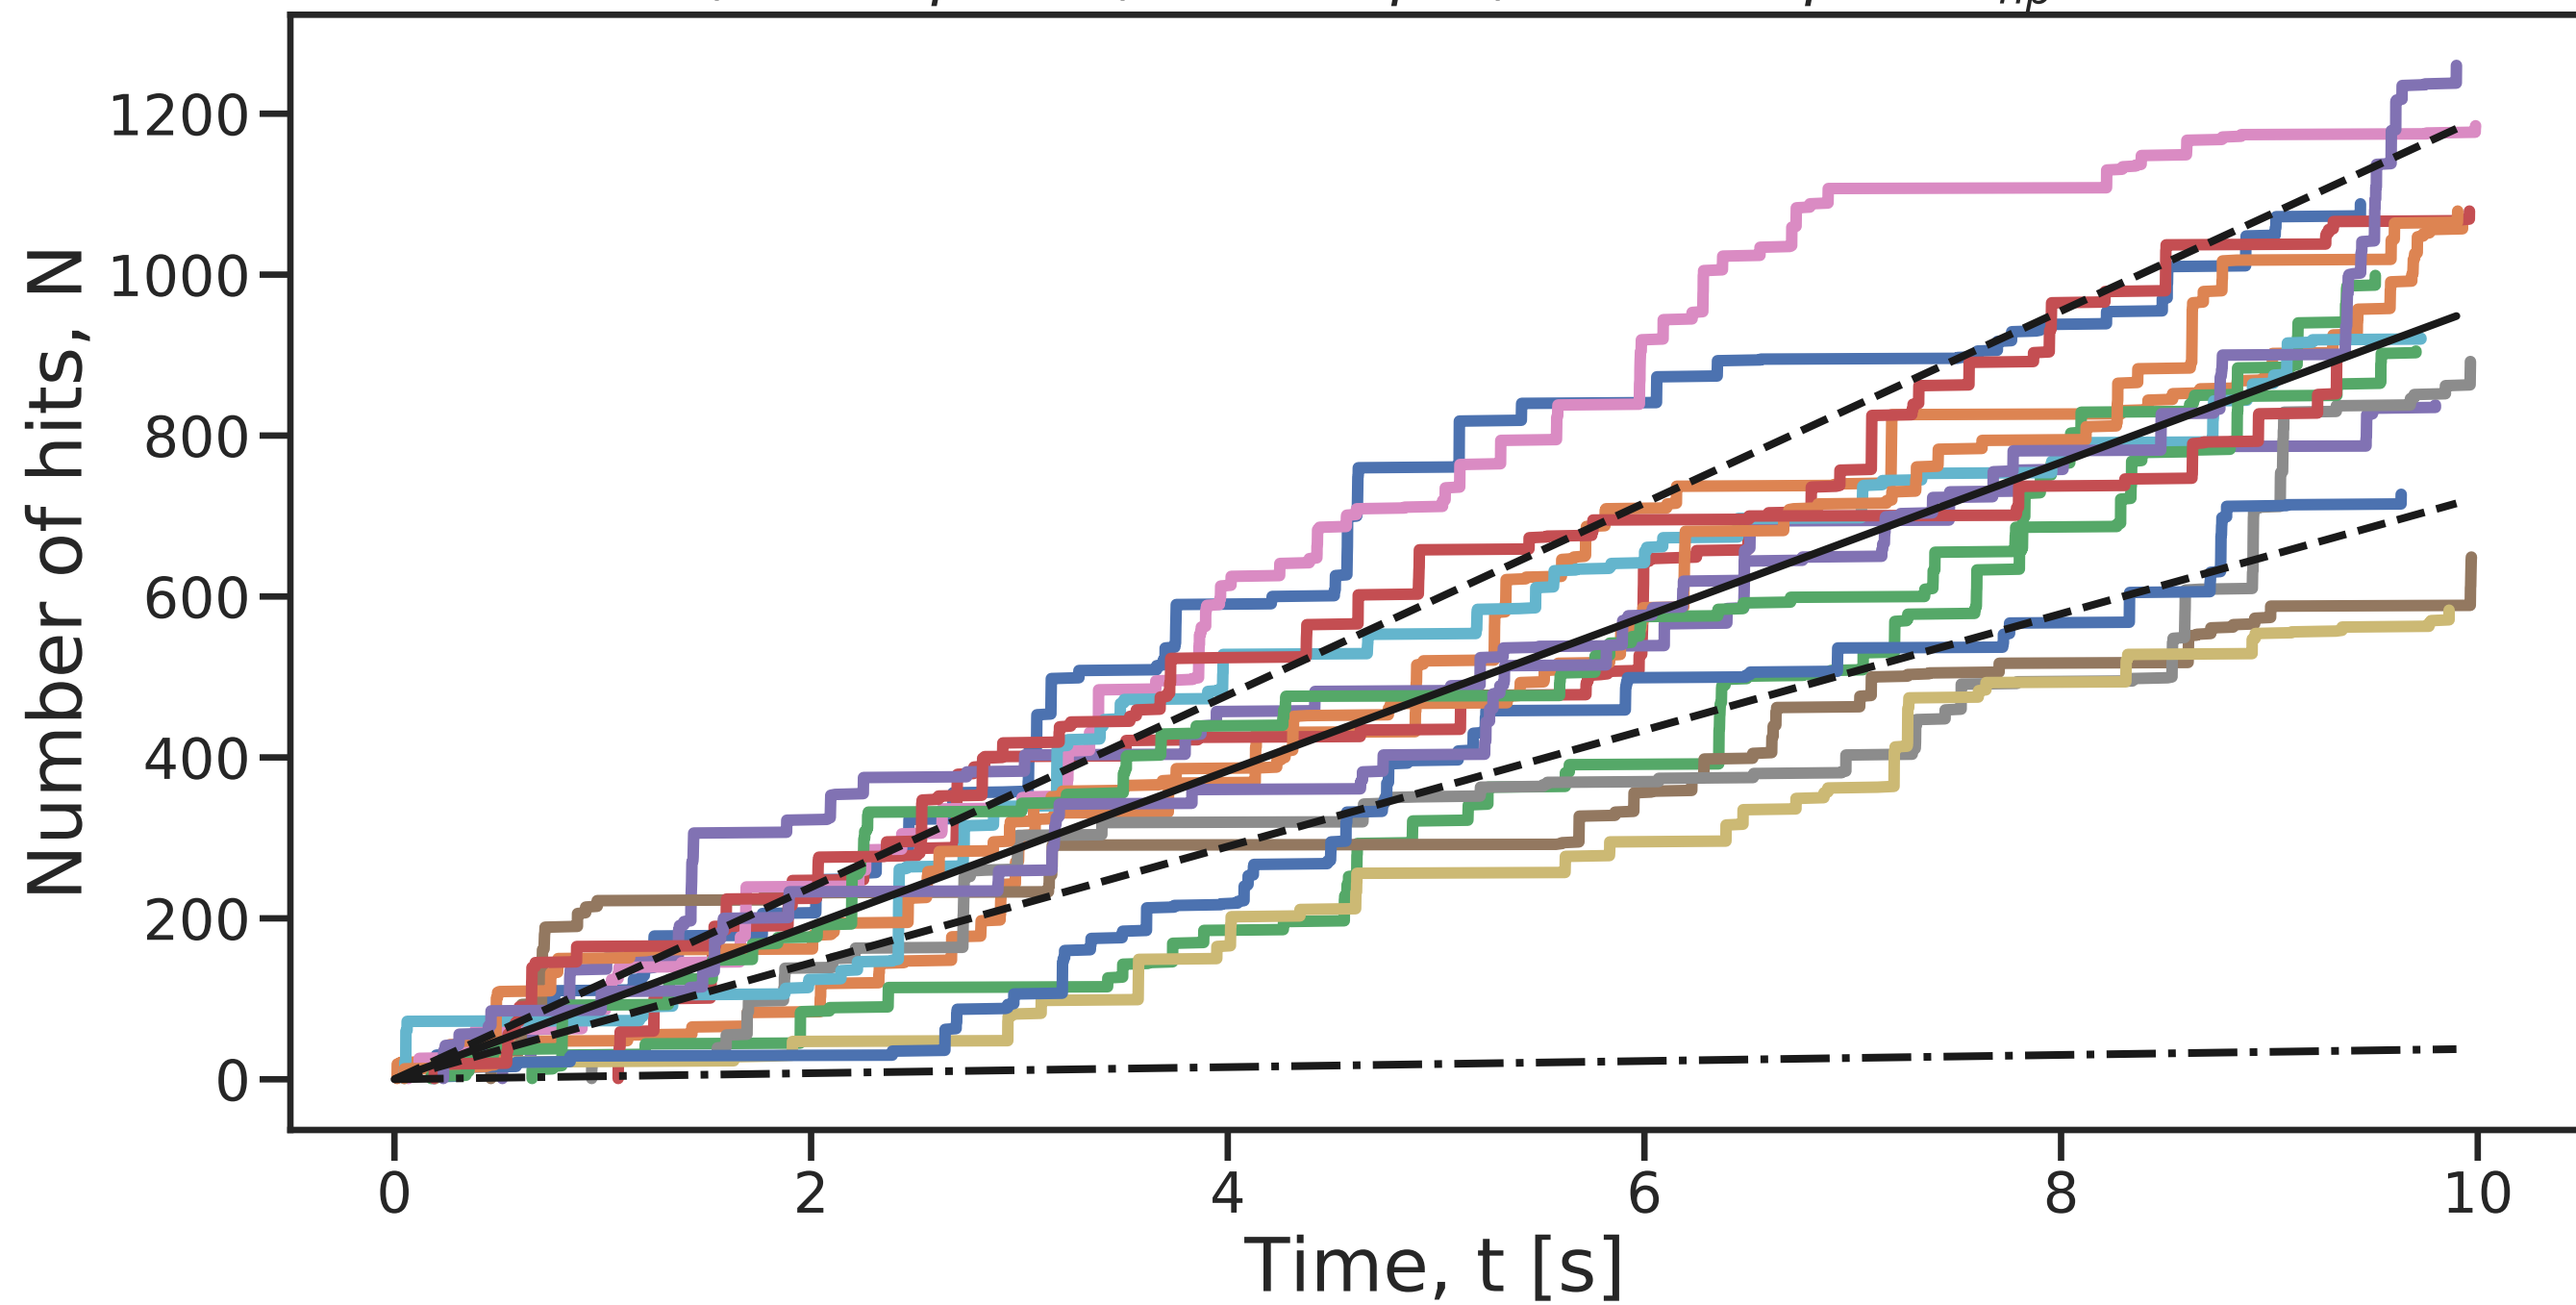

$c = 1.0 \text{ nM}; D = 795 \text{ } \mu\text{m}^2/\text{s}; R = 0.1 \text{ } \mu\text{m}; \Delta t = 1.0 \text{ } \mu\text{s} \langle N_{np} \rangle = 2915.6 \pm 58.8$

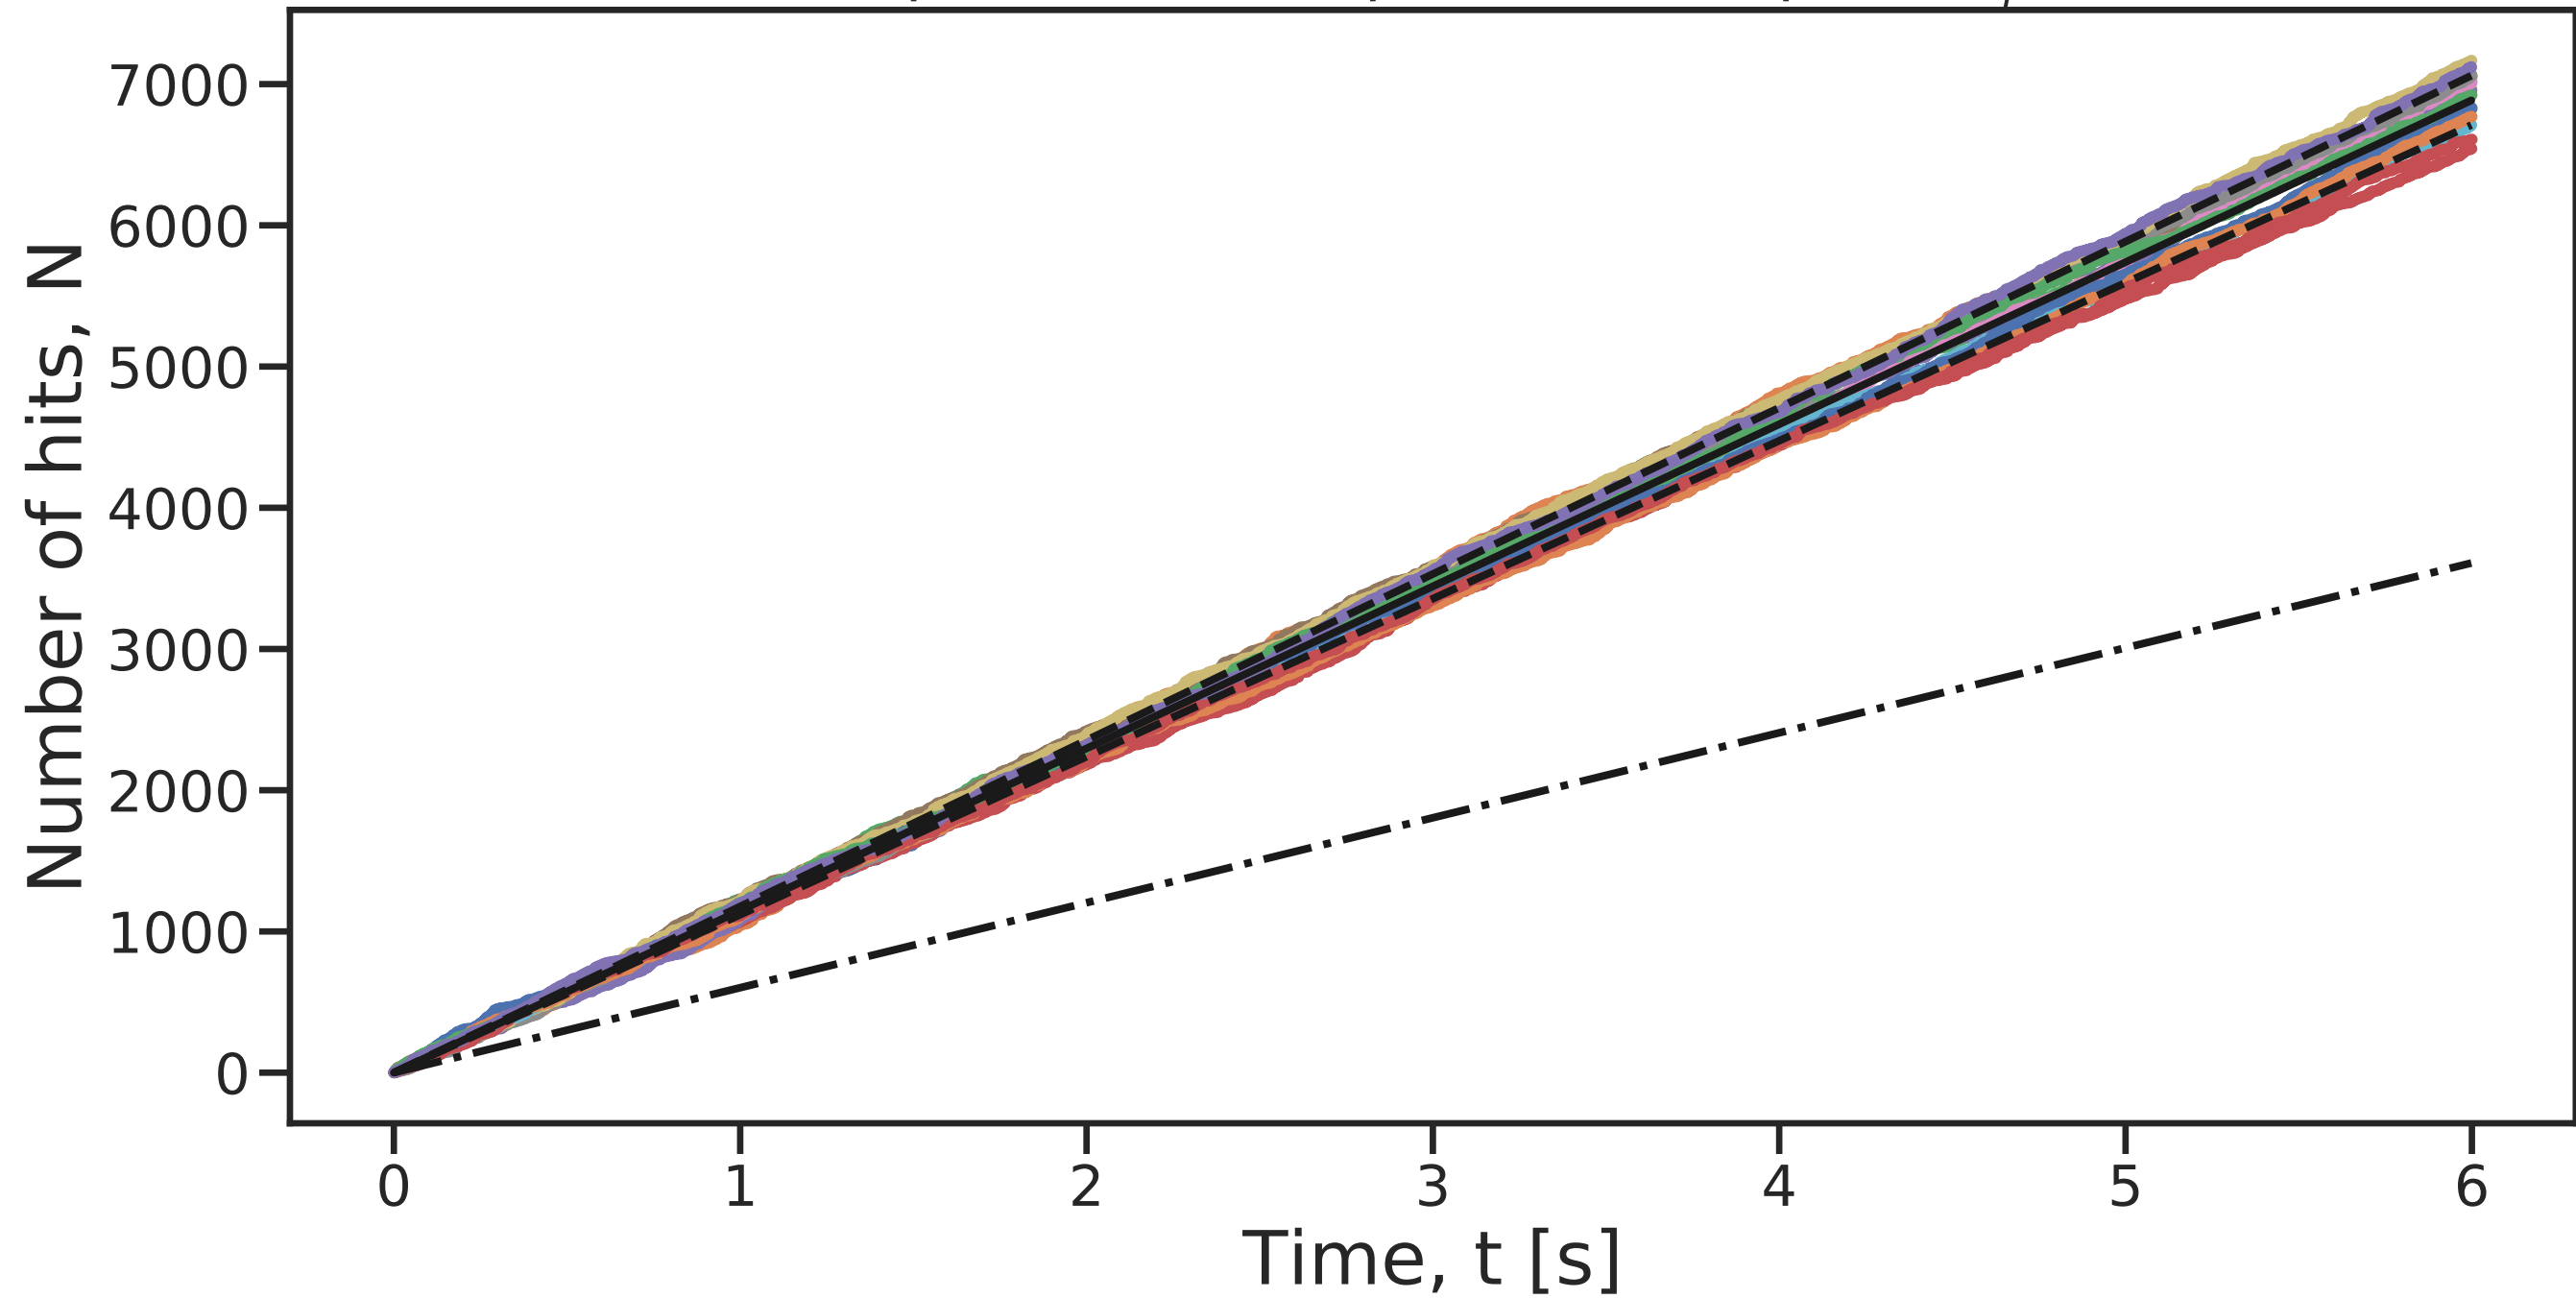

$c = 1.0 \text{ nM}; D = 80 \text{ } \mu\text{m}^2/\text{s}; R = 0.025 \text{ } \mu\text{m}; \Delta t = 0.01 \text{ } \mu\text{s} \langle N_{np} \rangle = 73.9 \pm 13.7$

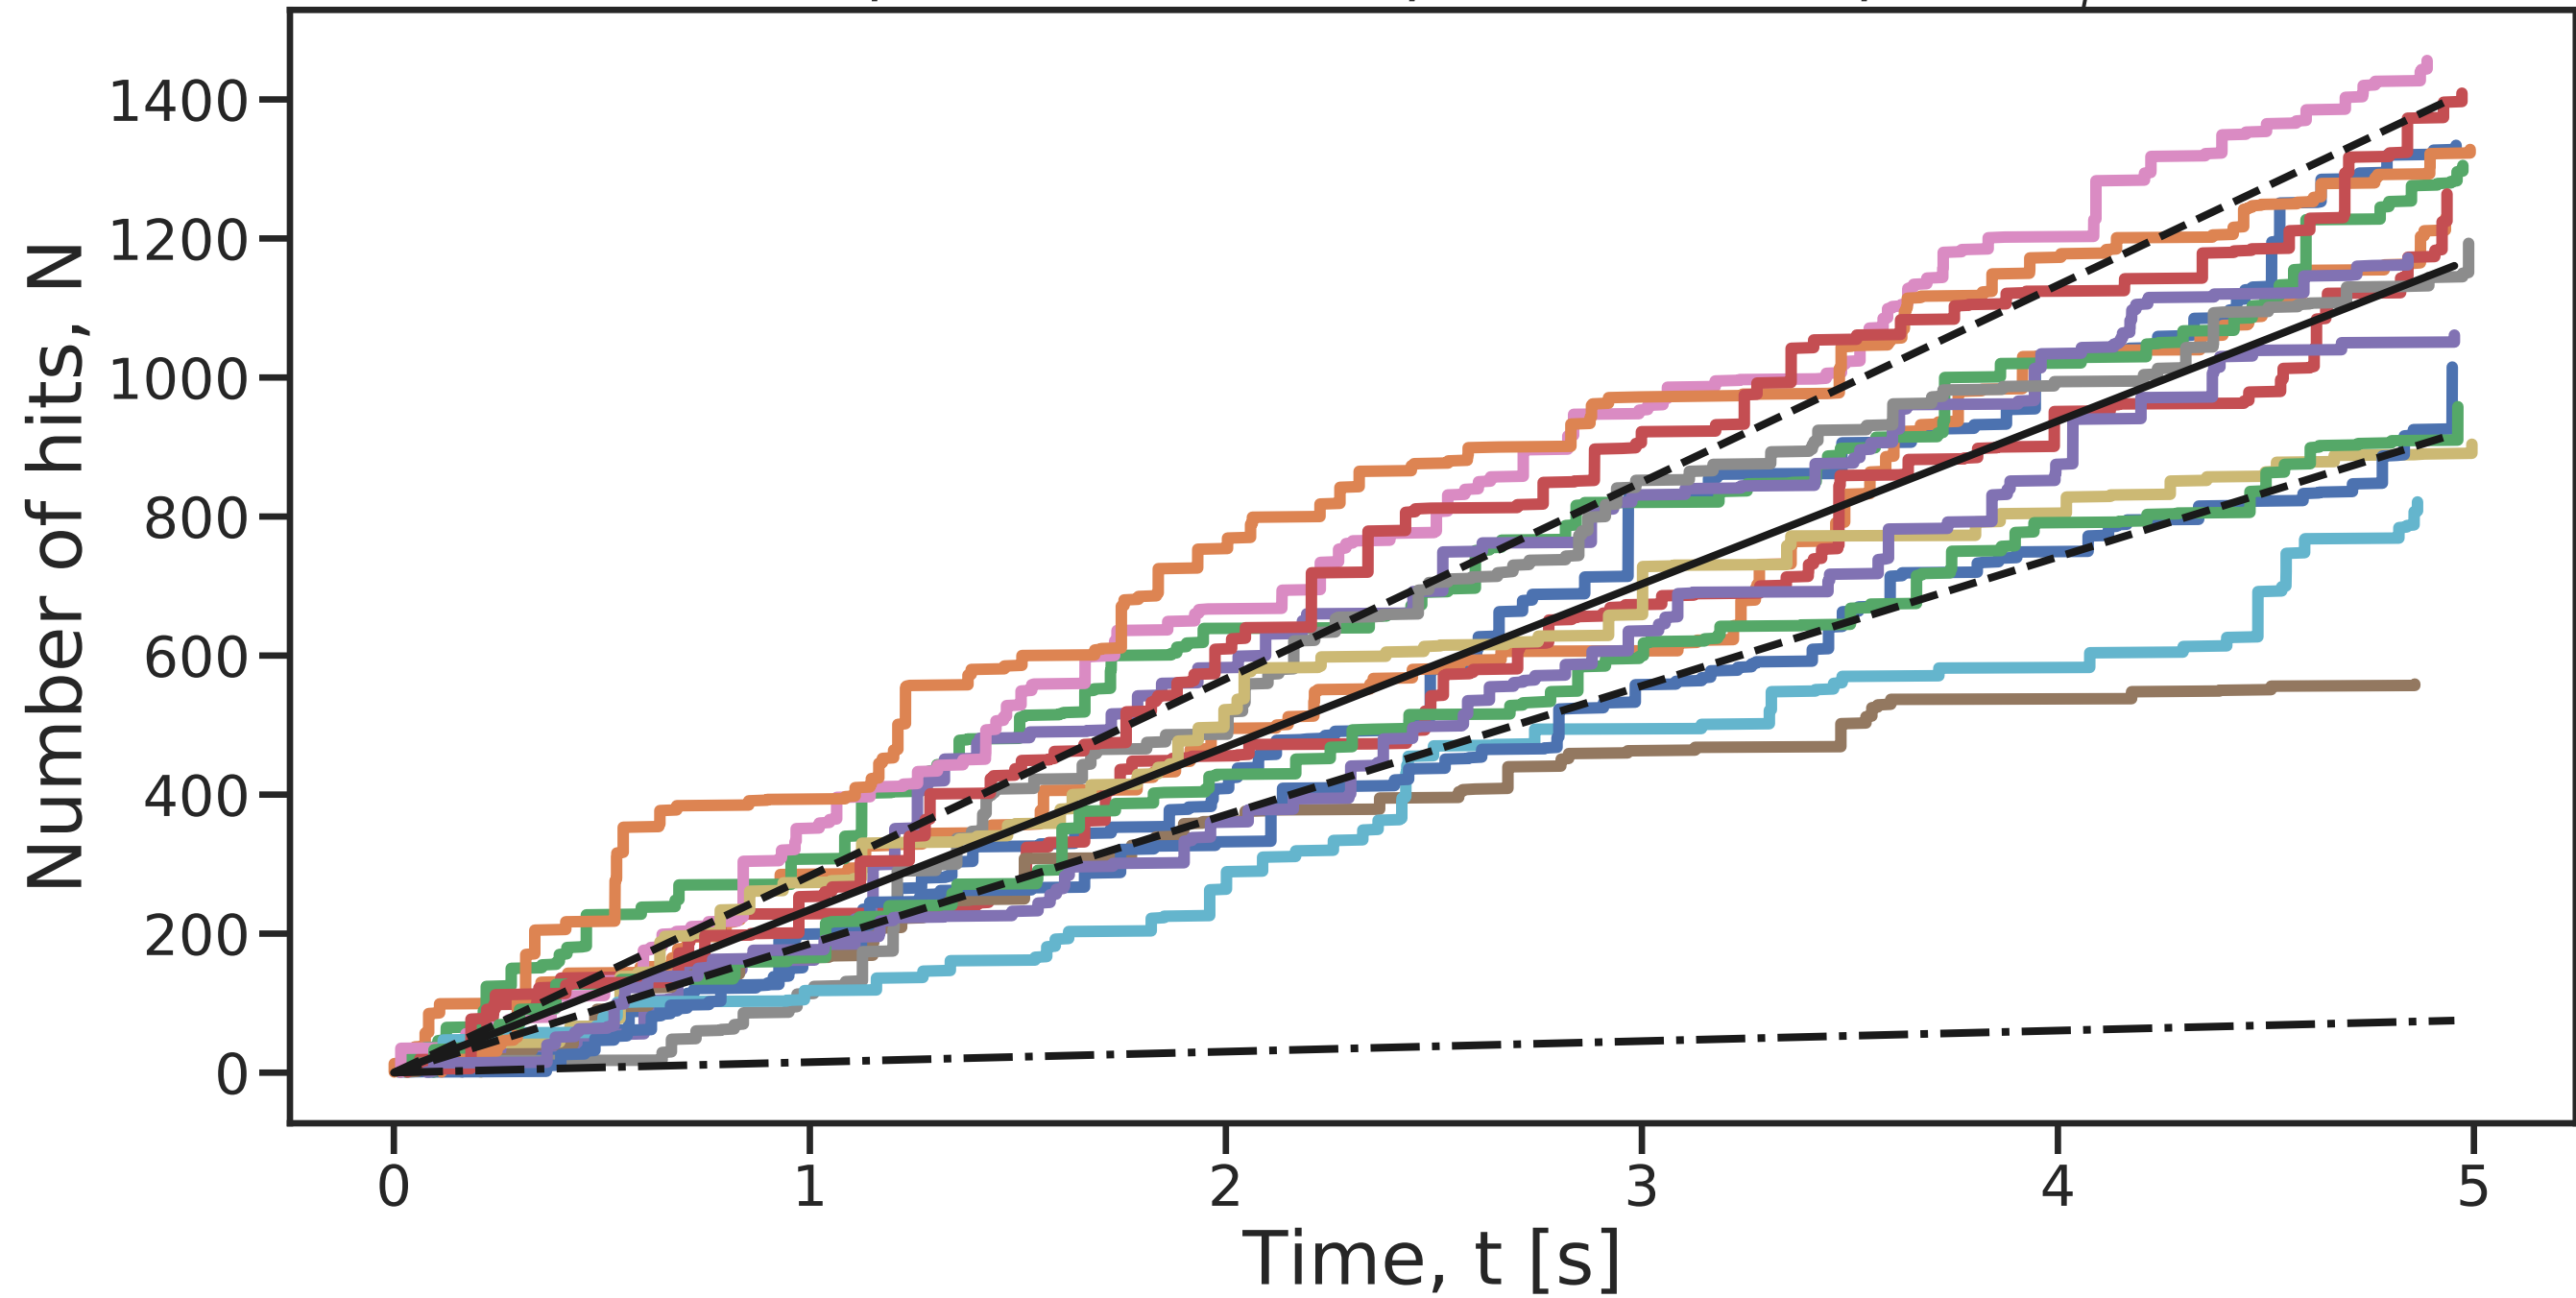

$c = 1.0 \text{ nM}; D = 80 \text{ } \mu\text{m}^2/\text{s}; R = 0.0375 \text{ } \mu\text{m}; \Delta t = 0.01 \text{ } \mu\text{s} \langle N_{np} \rangle = 115.3 \pm 20.3$

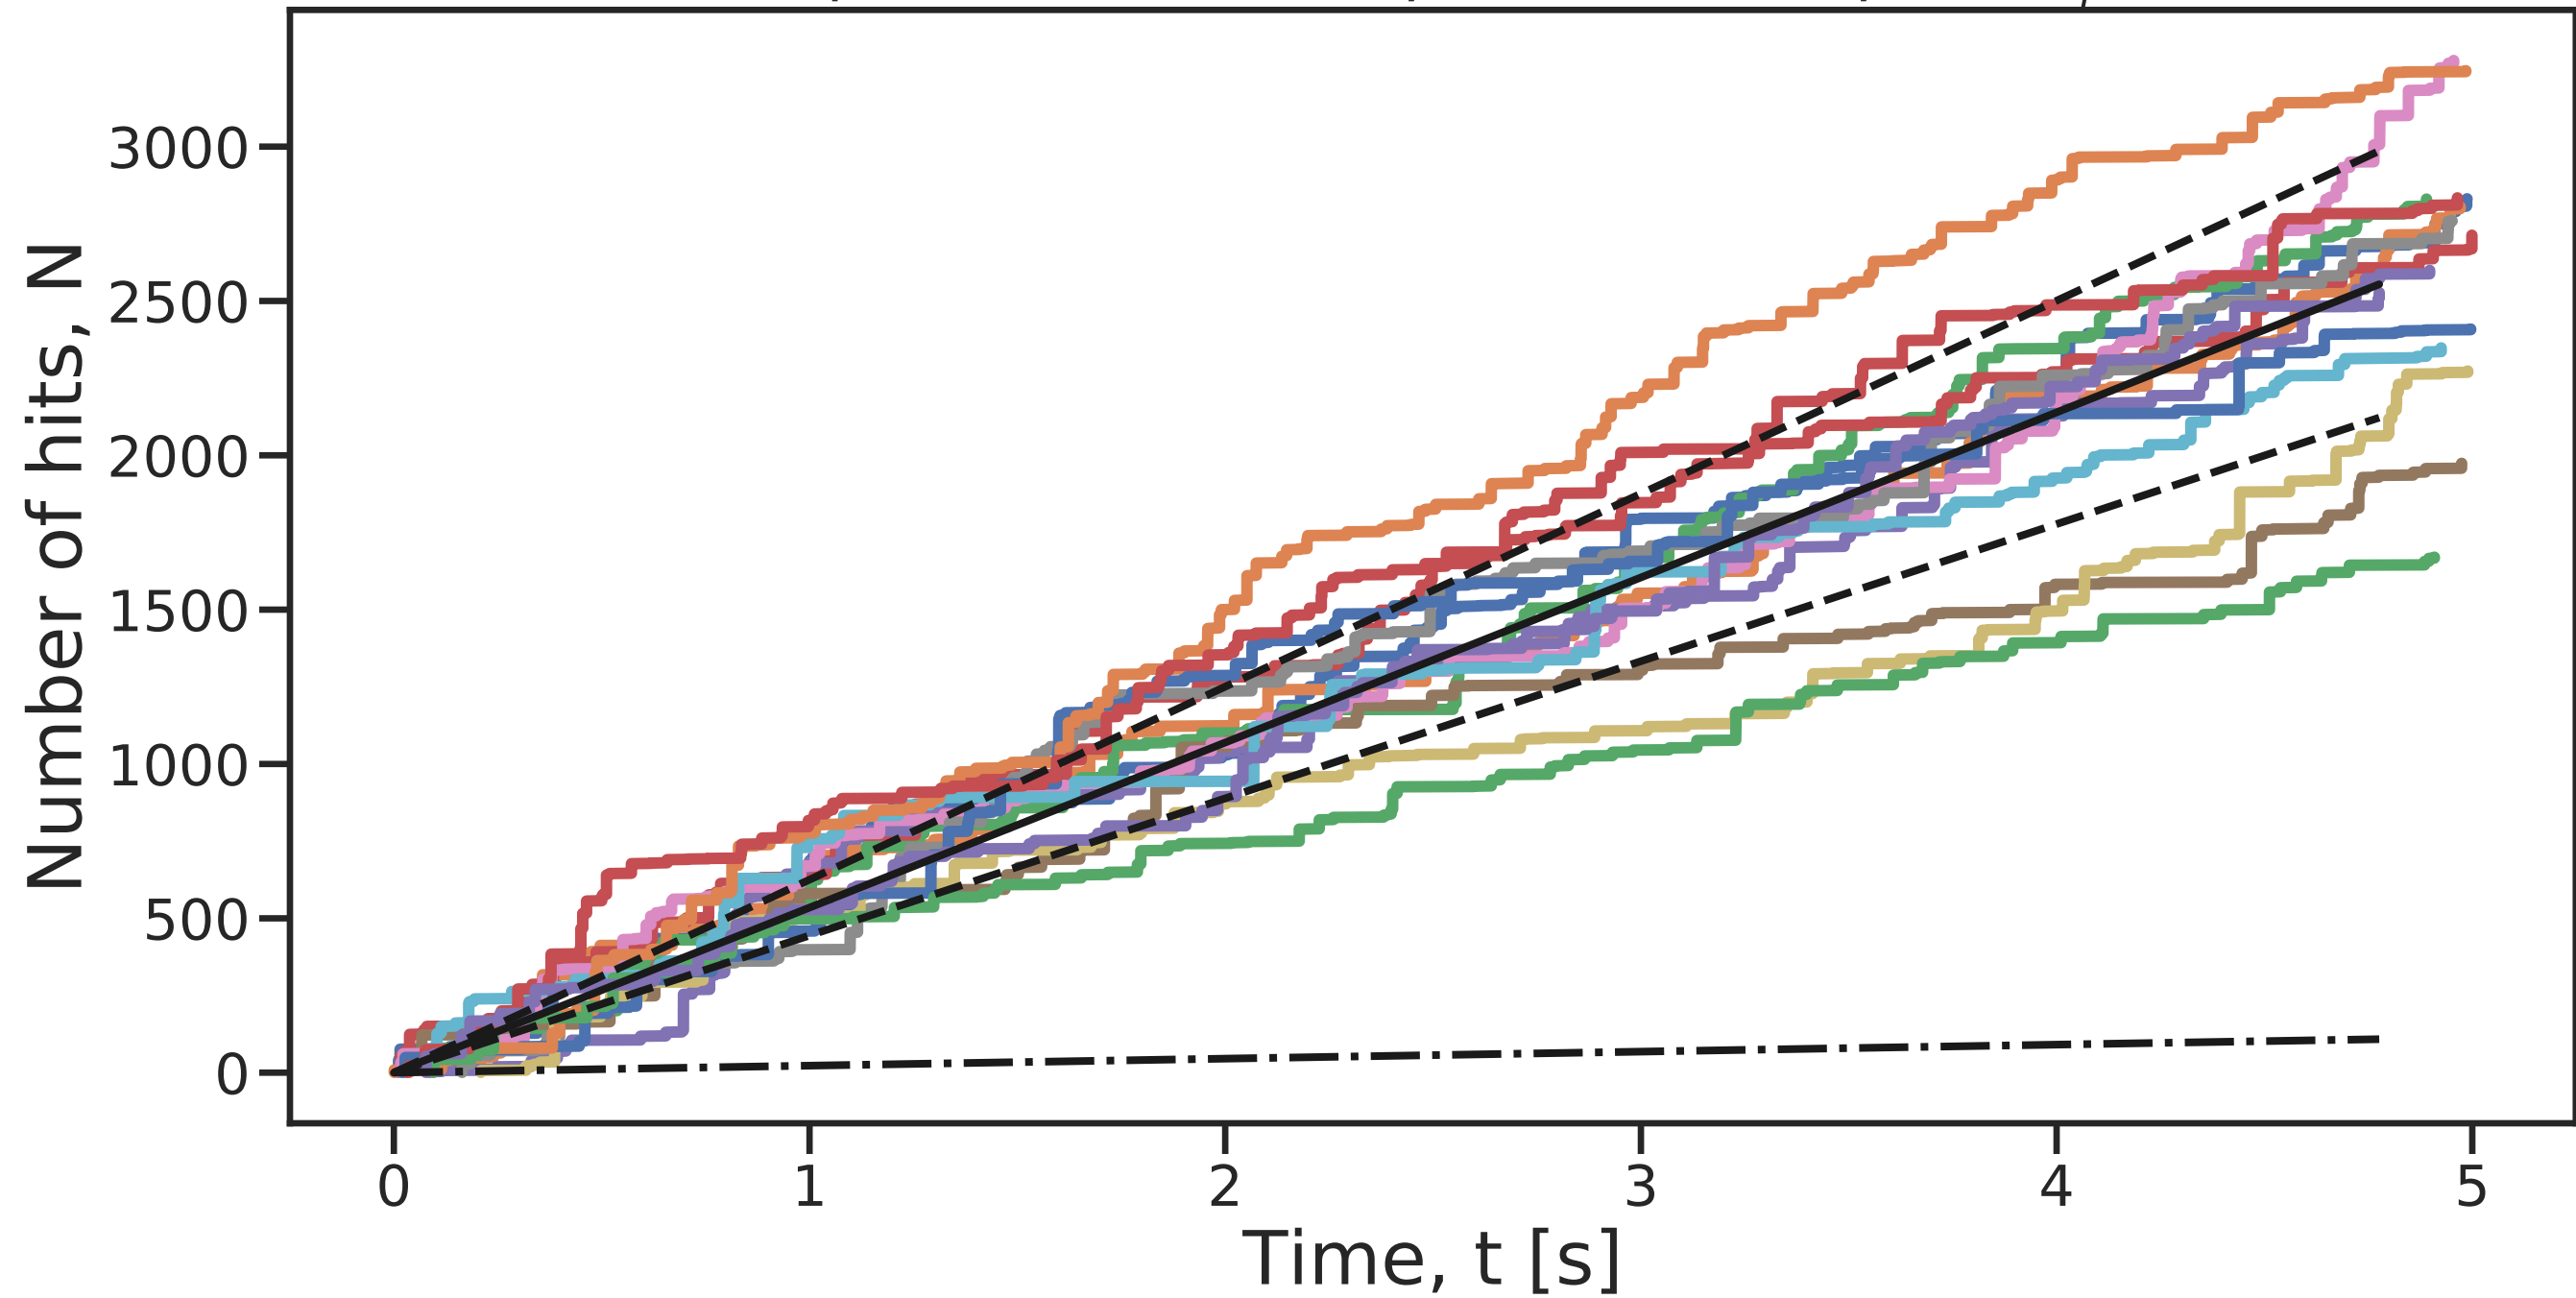

$c = 1.0 \text{ nM}; D = 80 \text{ } \mu\text{m}^2/\text{s}; R = 0.05 \text{ } \mu\text{m}; \Delta t = 0.01 \text{ } \mu\text{s} \langle N_{np} \rangle = 156.4 \pm 20.4$

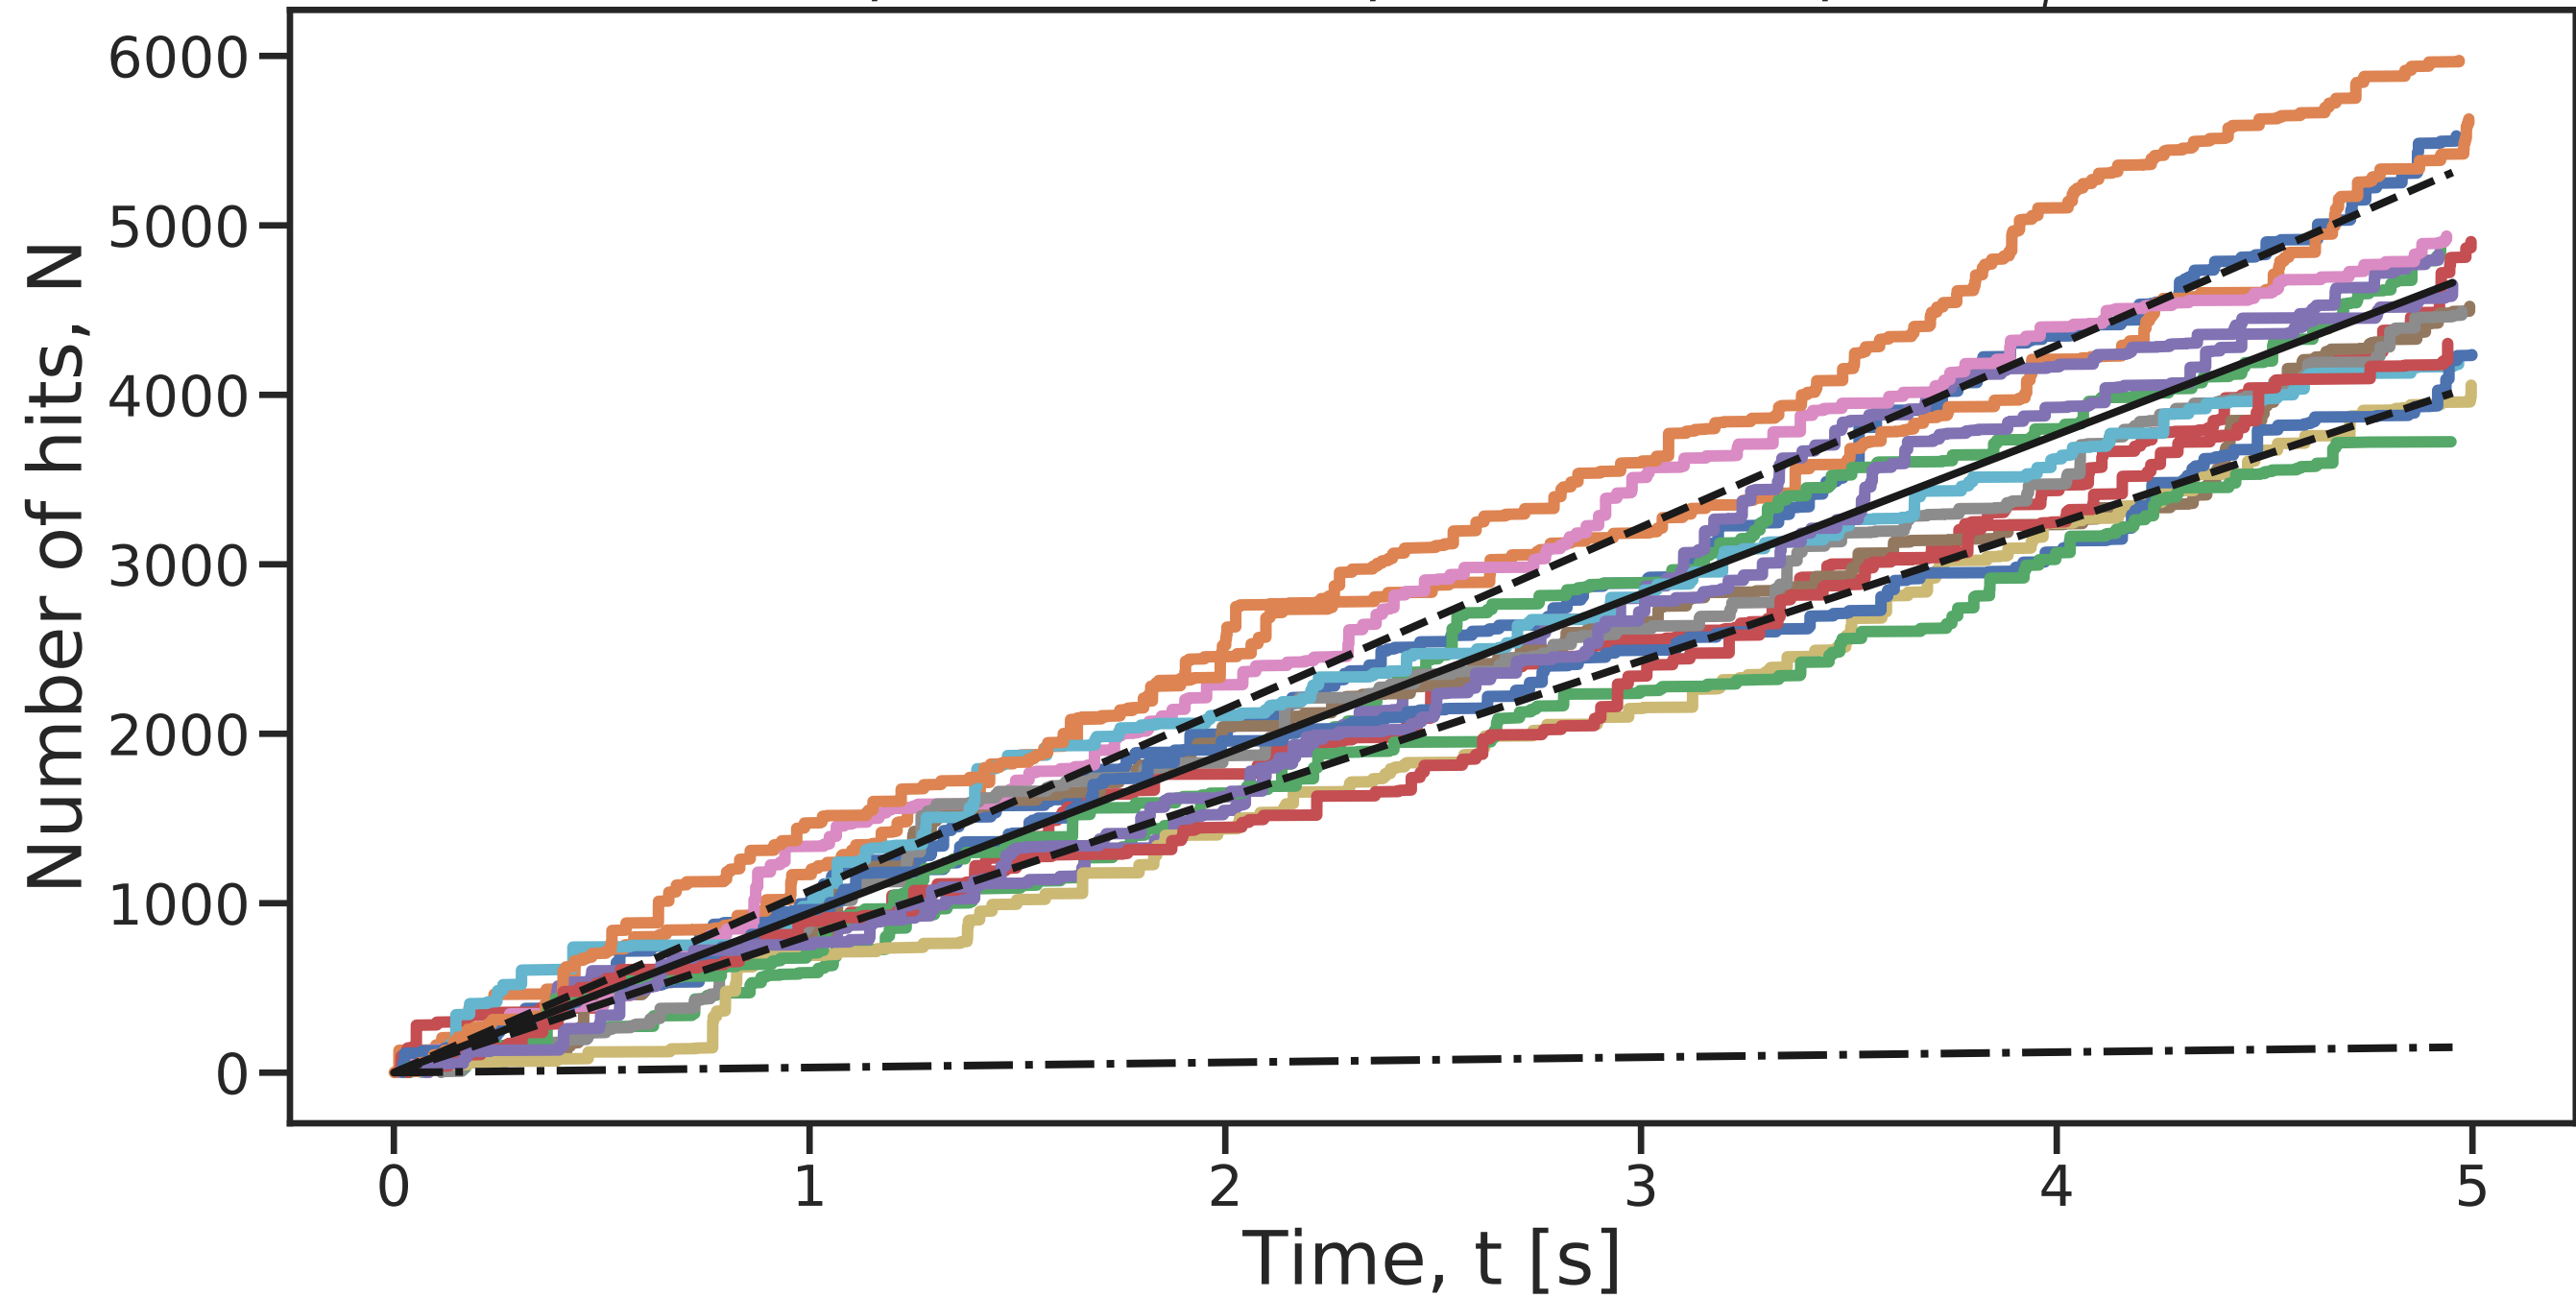

$c = 1.0 \text{ nM}; D = 80 \text{ } \mu\text{m}^2/\text{s}; R = 0.0625 \text{ } \mu\text{m}; \Delta t = 0.01 \text{ } \mu\text{s} < N_{np} > = 186.0 \pm 39.2$

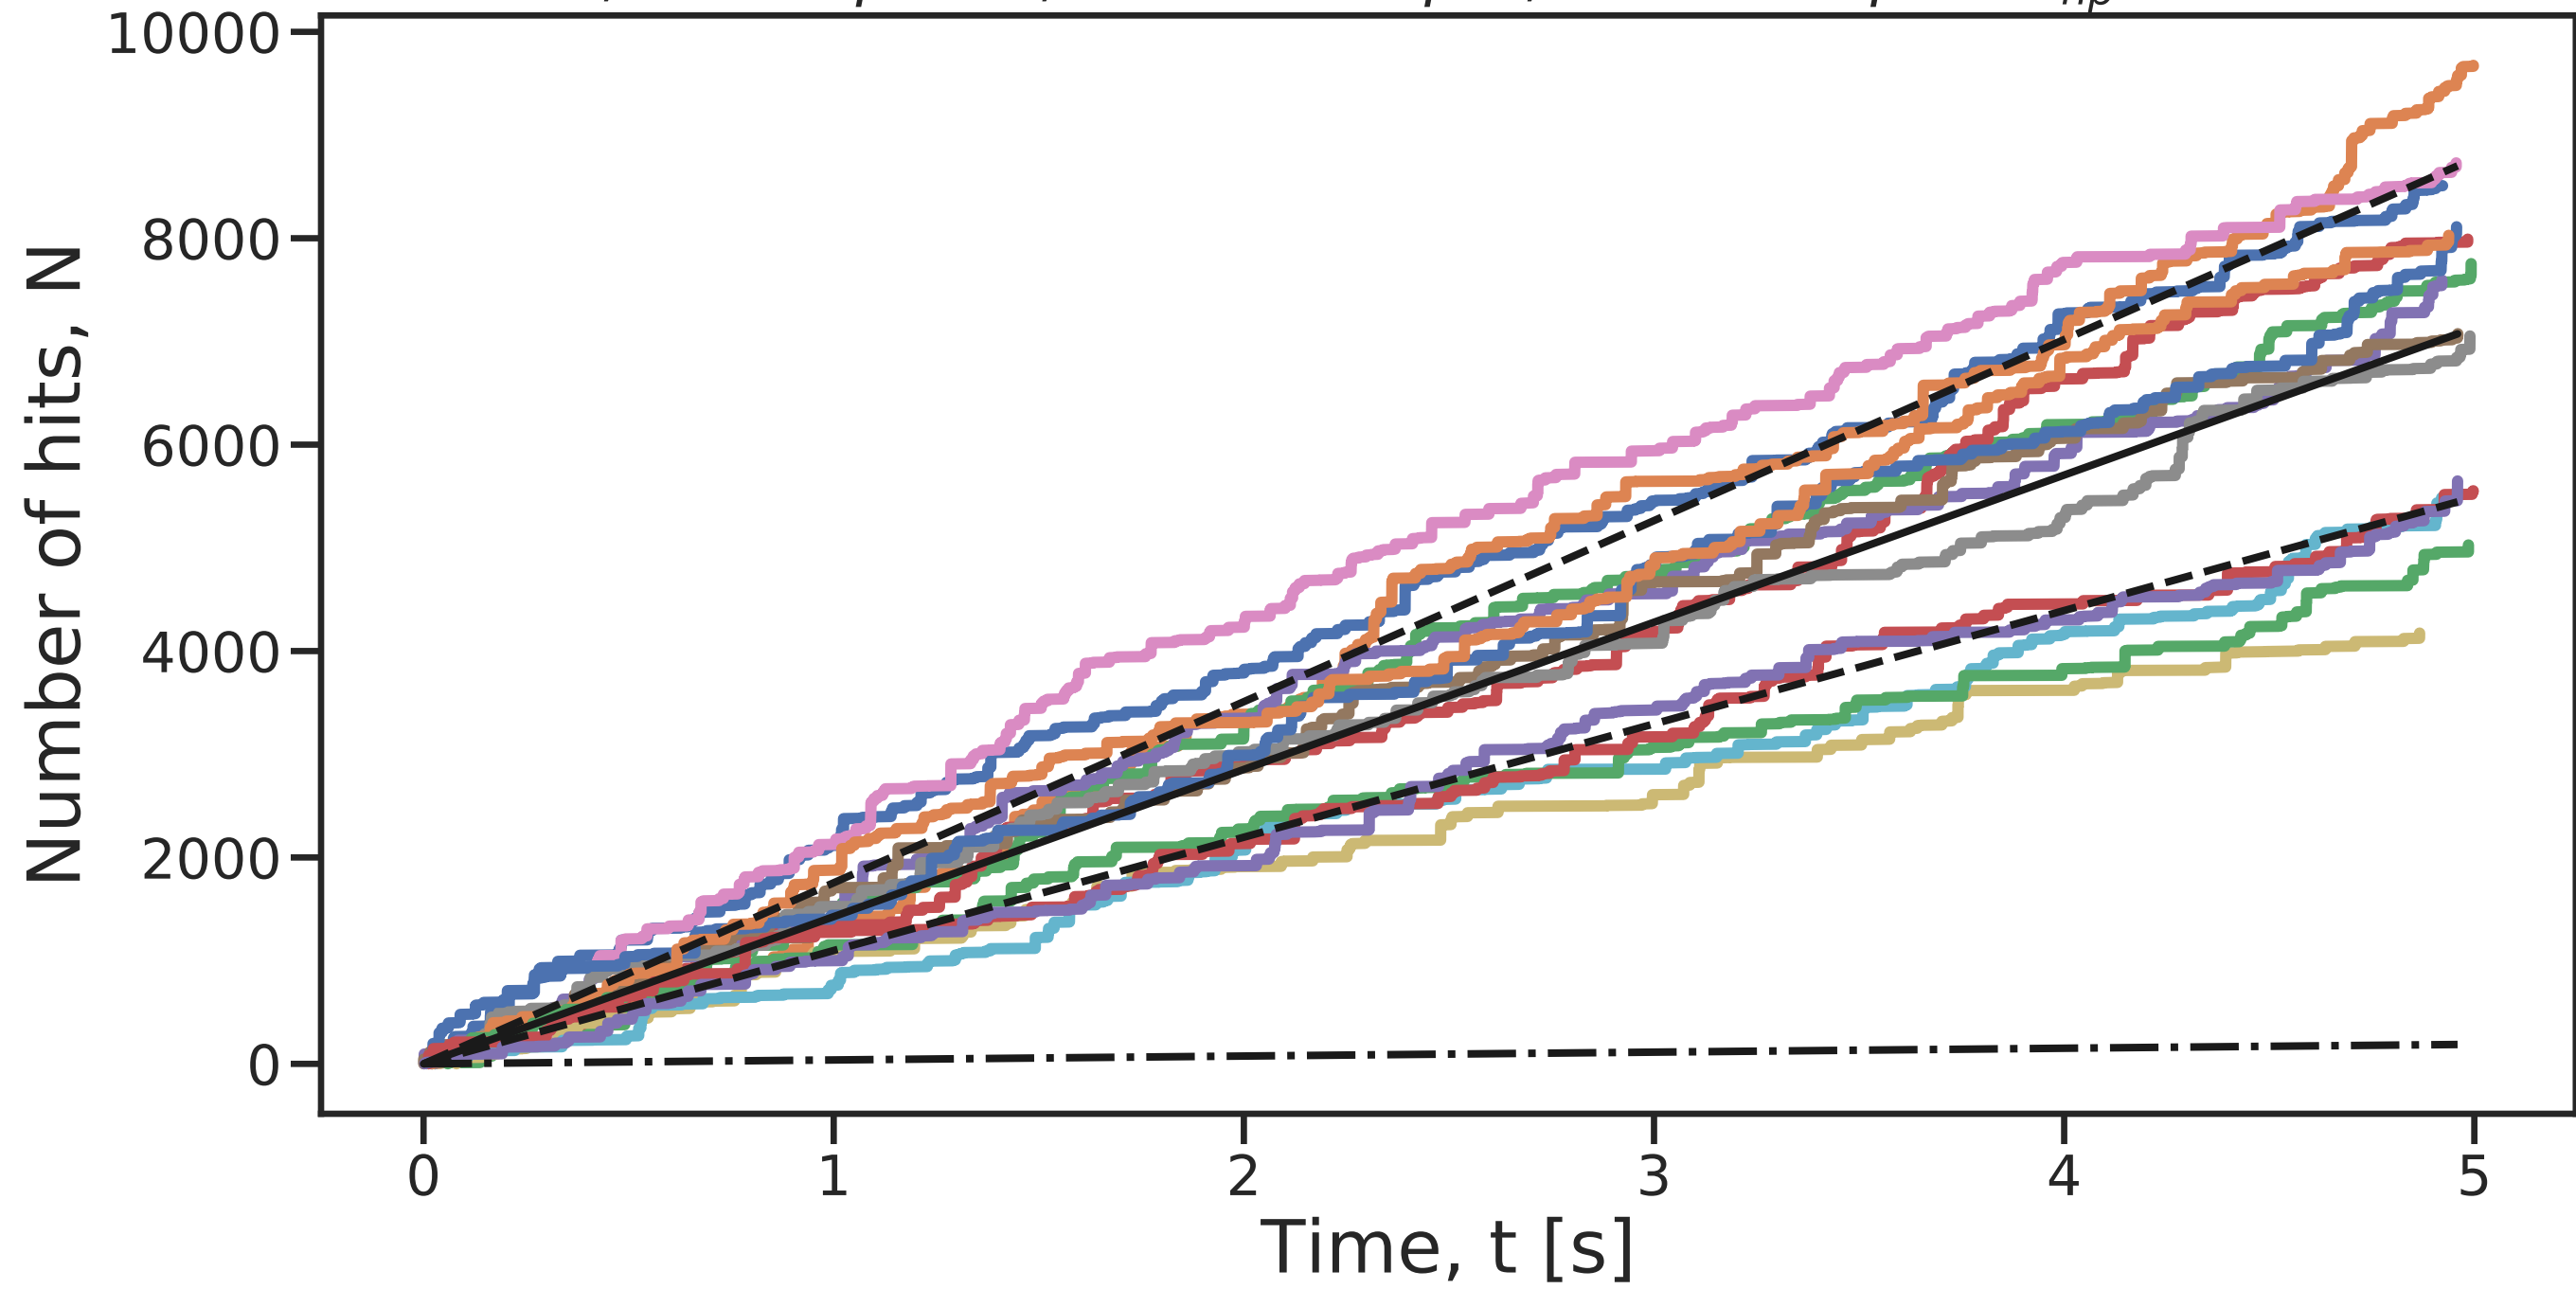

$c = 1.0 \text{ nM}; D = 80 \text{ } \mu\text{m}^2/\text{s}; R = 0.075 \text{ } \mu\text{m}; \Delta t = 0.1 \text{ } \mu\text{s} \langle N_{np} \rangle = 235.0 \pm 39.9$

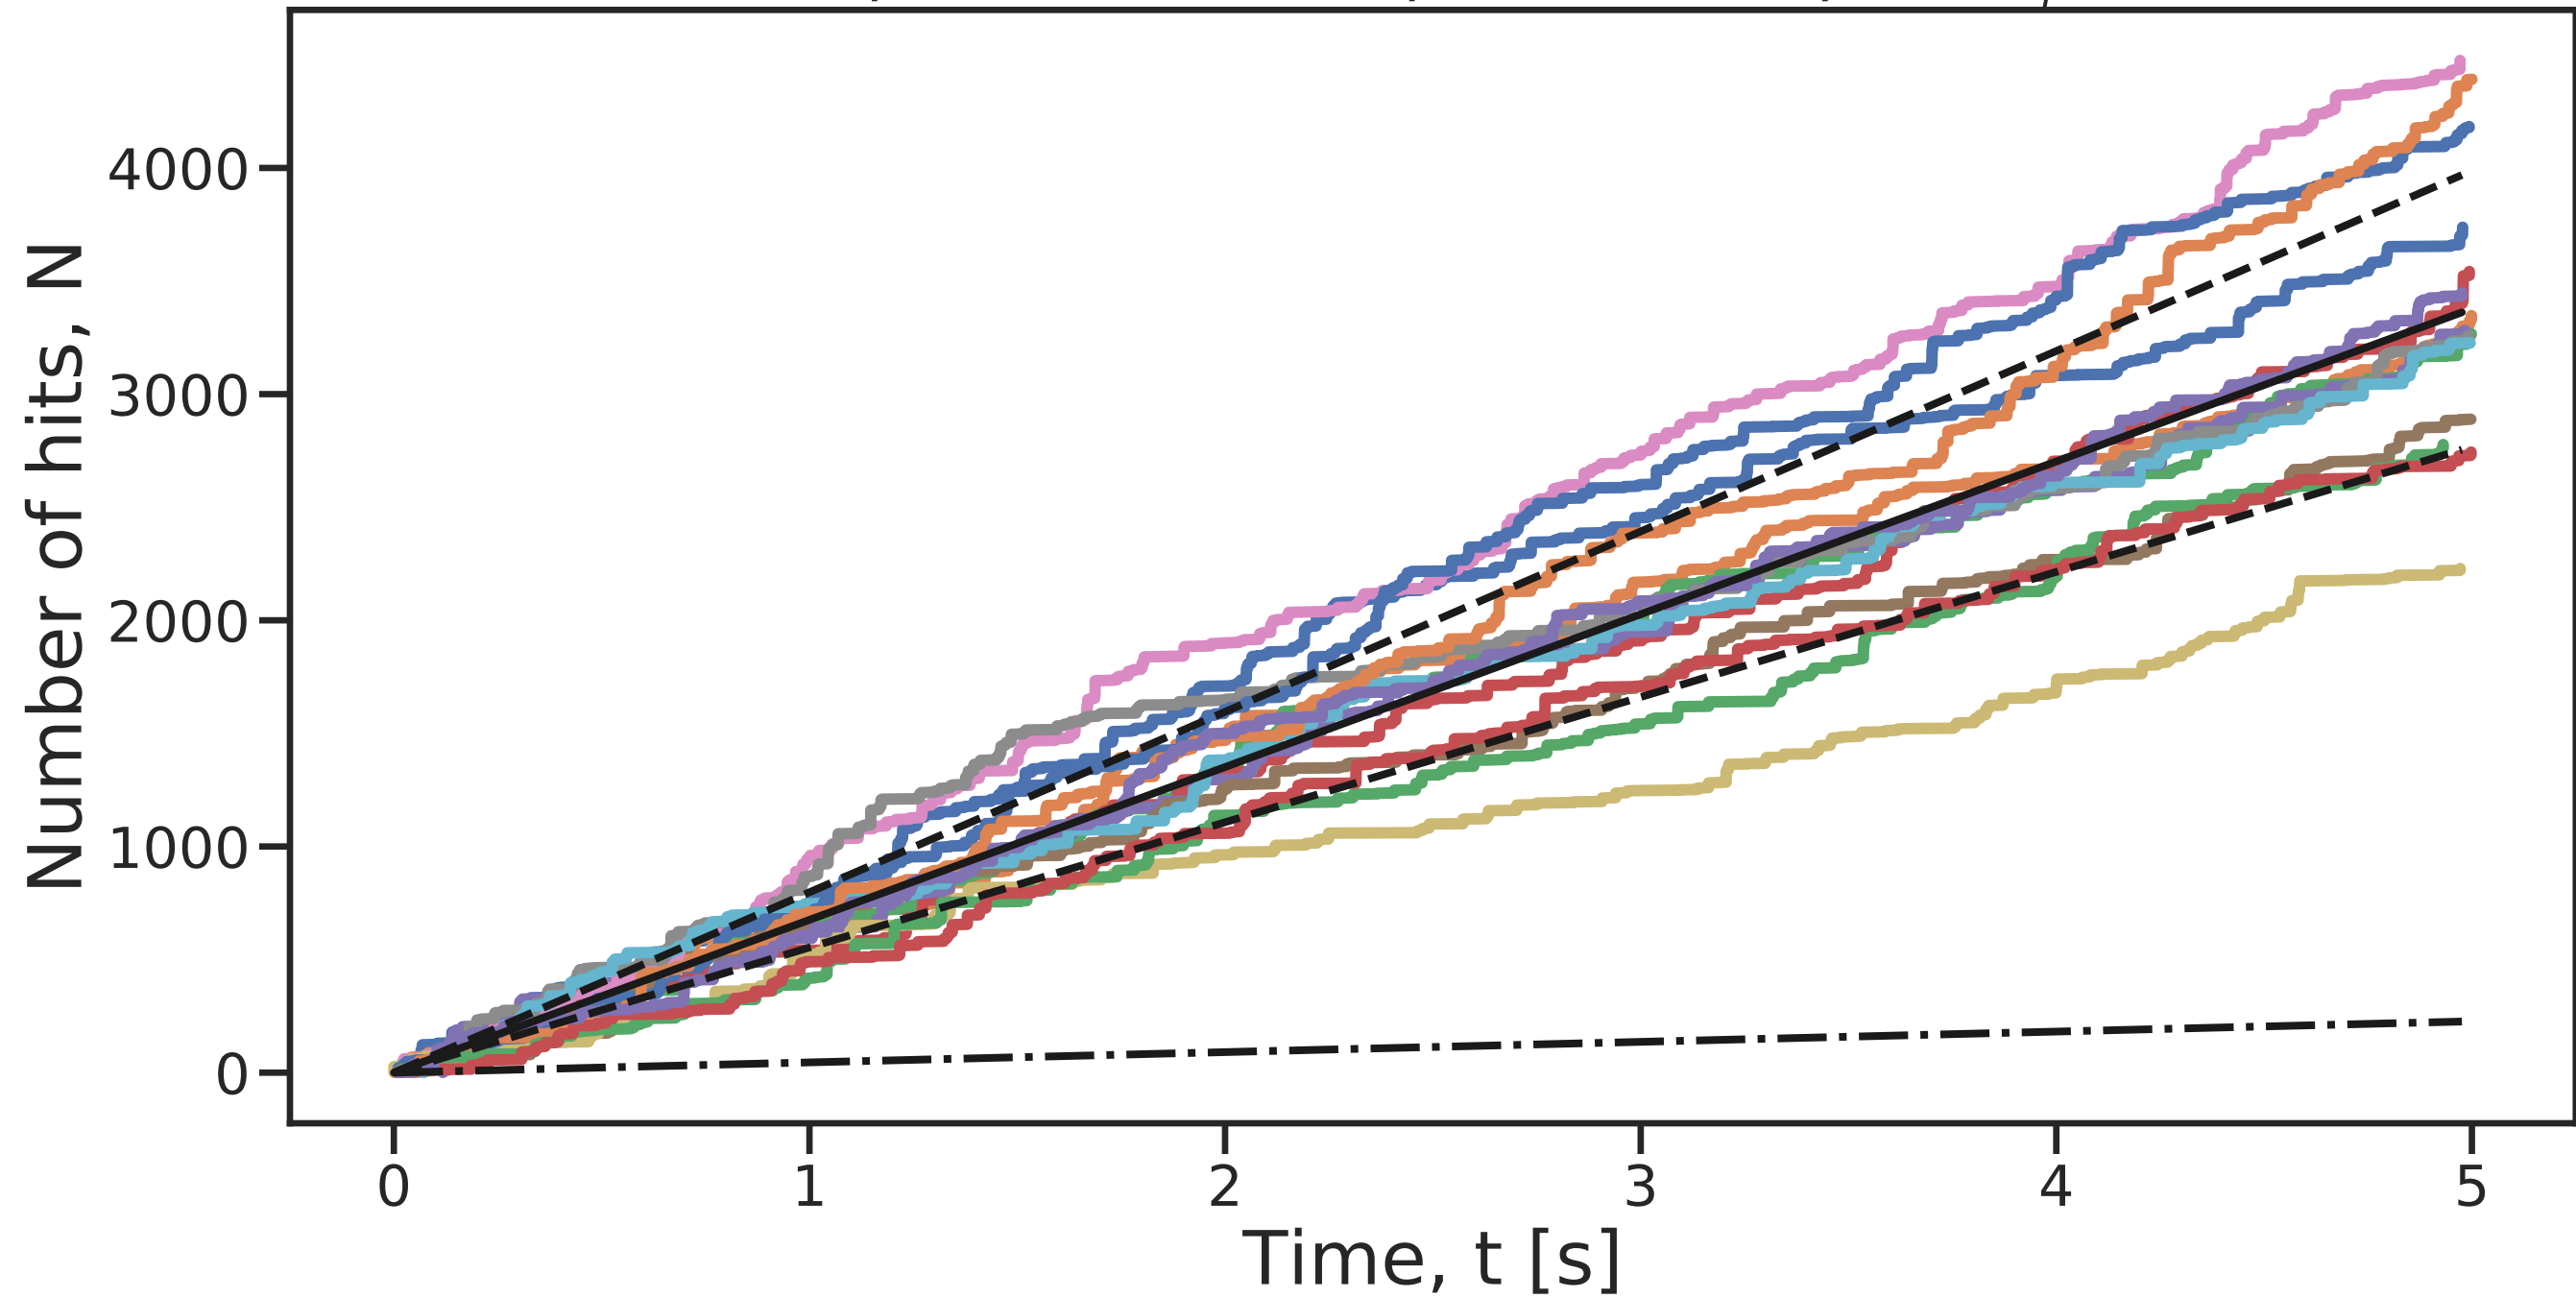

$c = 1.0 \text{ nM}$ ;  $D = 80 \text{ } \mu\text{m}^2/\text{s}$ ;  $R = 0.0875 \text{ } \mu\text{m}$ ;  $\Delta t = 0.1 \text{ } \mu\text{s}$   $\langle N_{np} \rangle = 280.8 \pm 52.0$

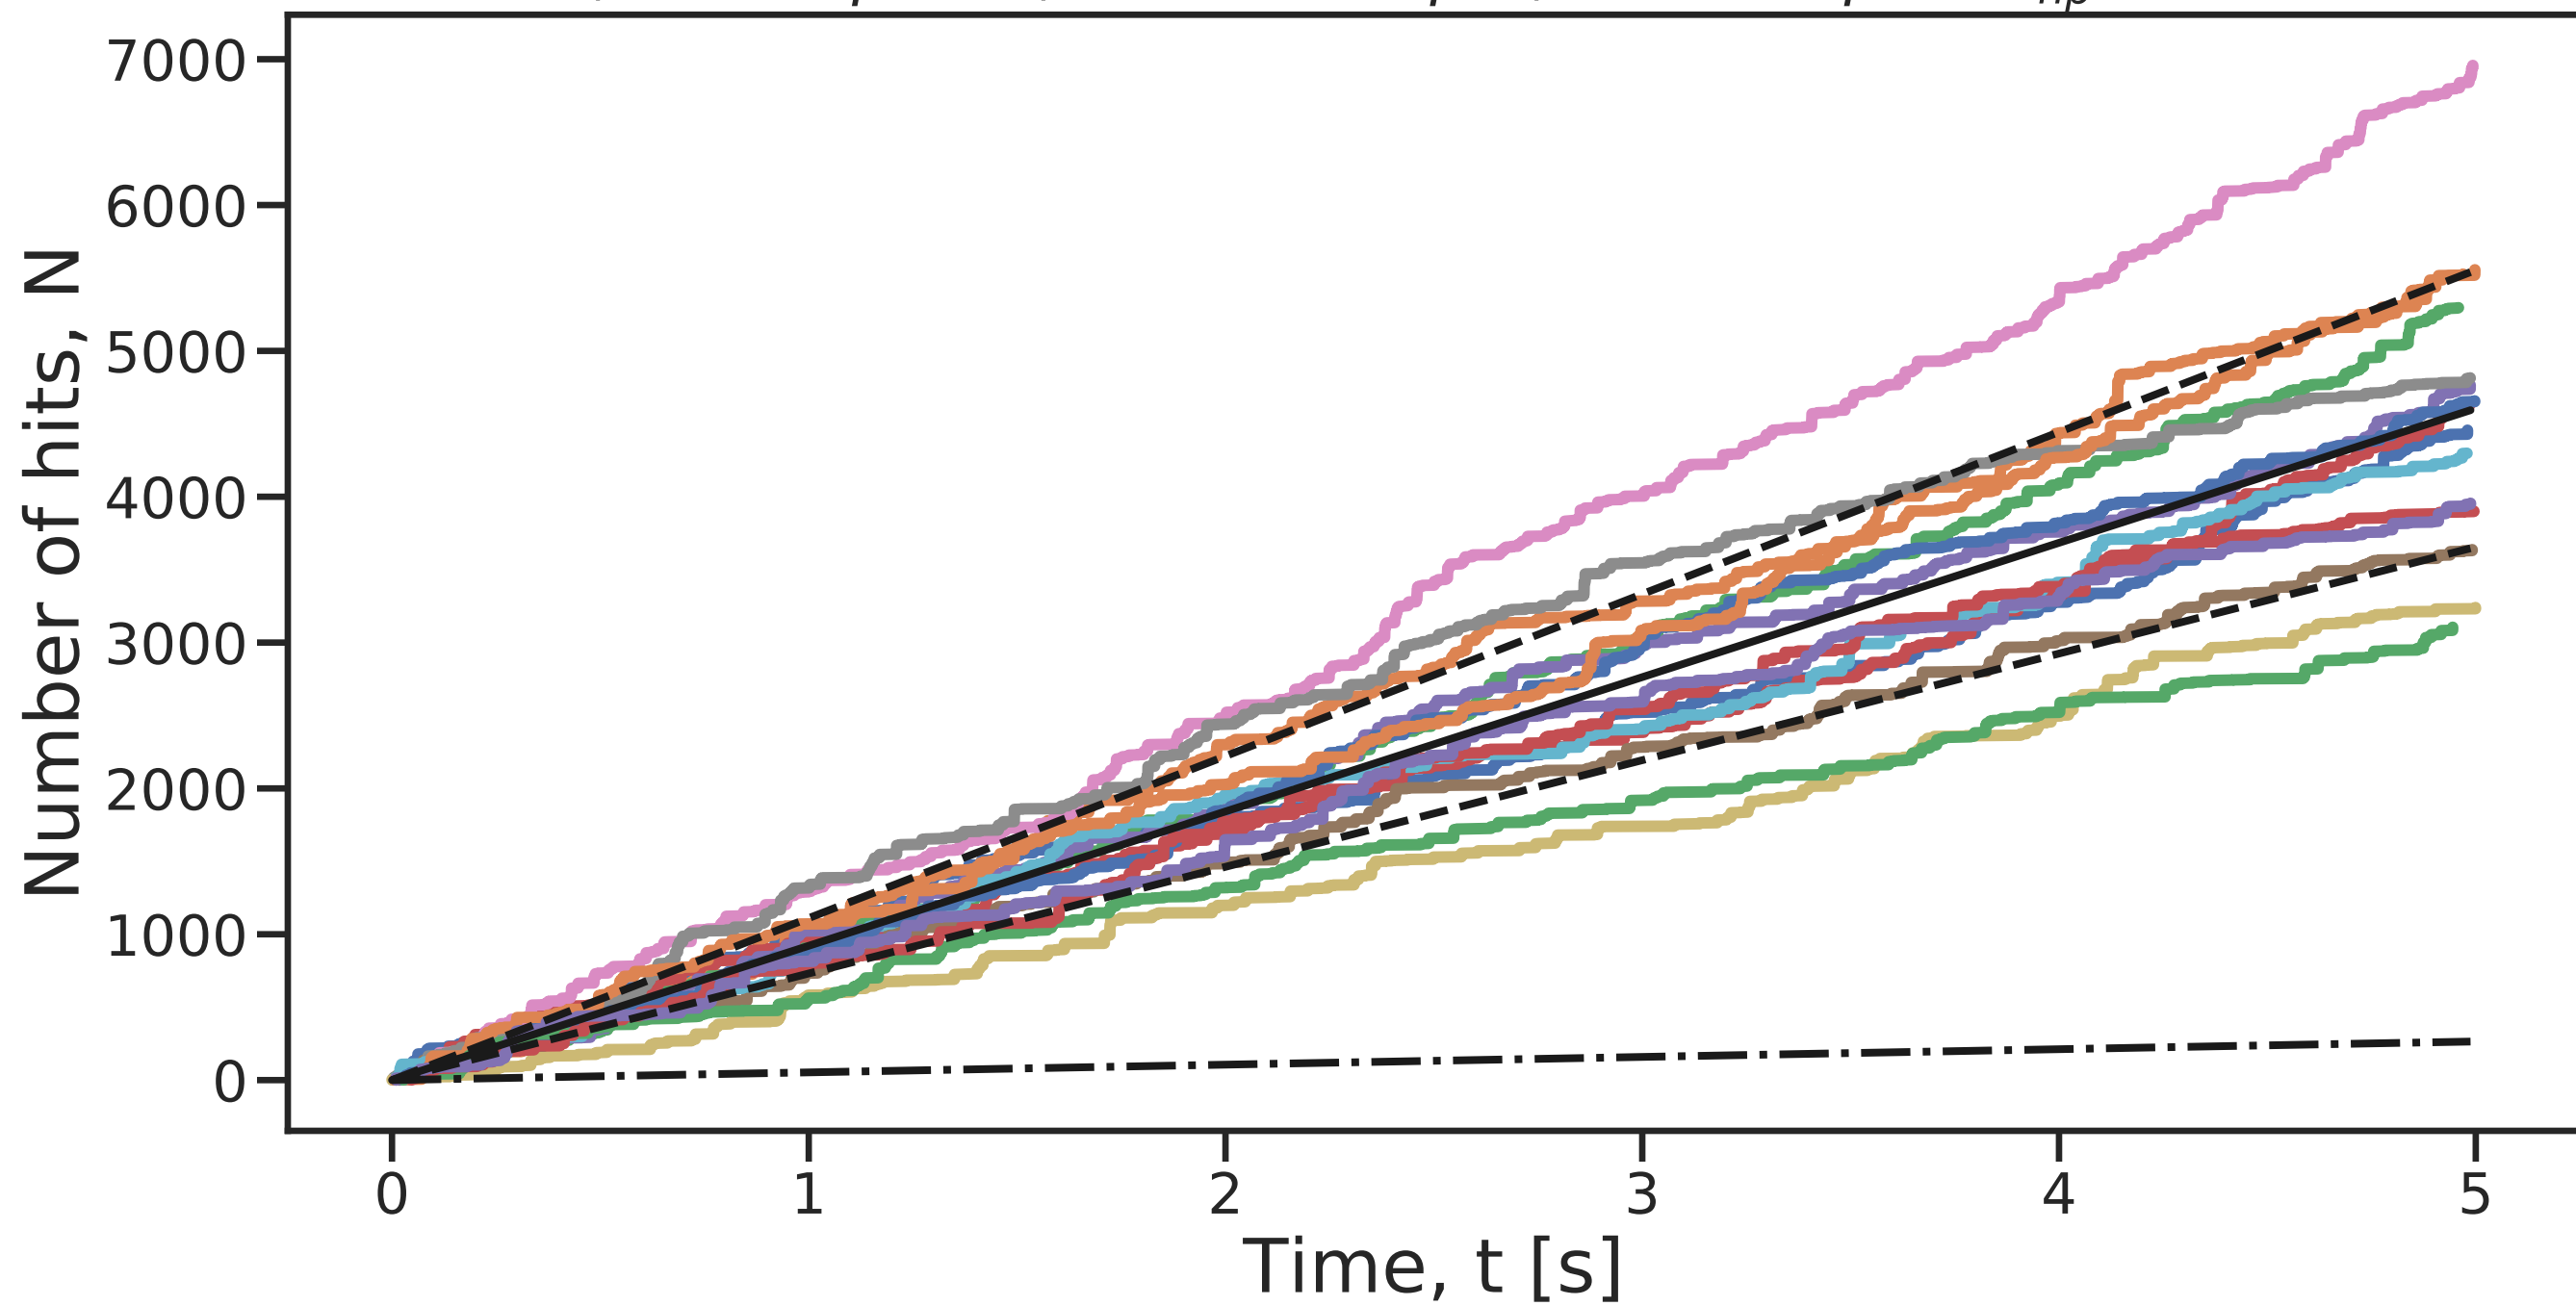



$c = 1.0 \text{ nM}$ ;  $D = 80 \text{ } \mu\text{m}^2/\text{s}$ ;  $R = 0.1125 \text{ } \mu\text{m}$ ;  $\Delta t = 1.0 \text{ } \mu\text{s}$   $\langle N_{np} \rangle = 340.5 \pm 58.9$

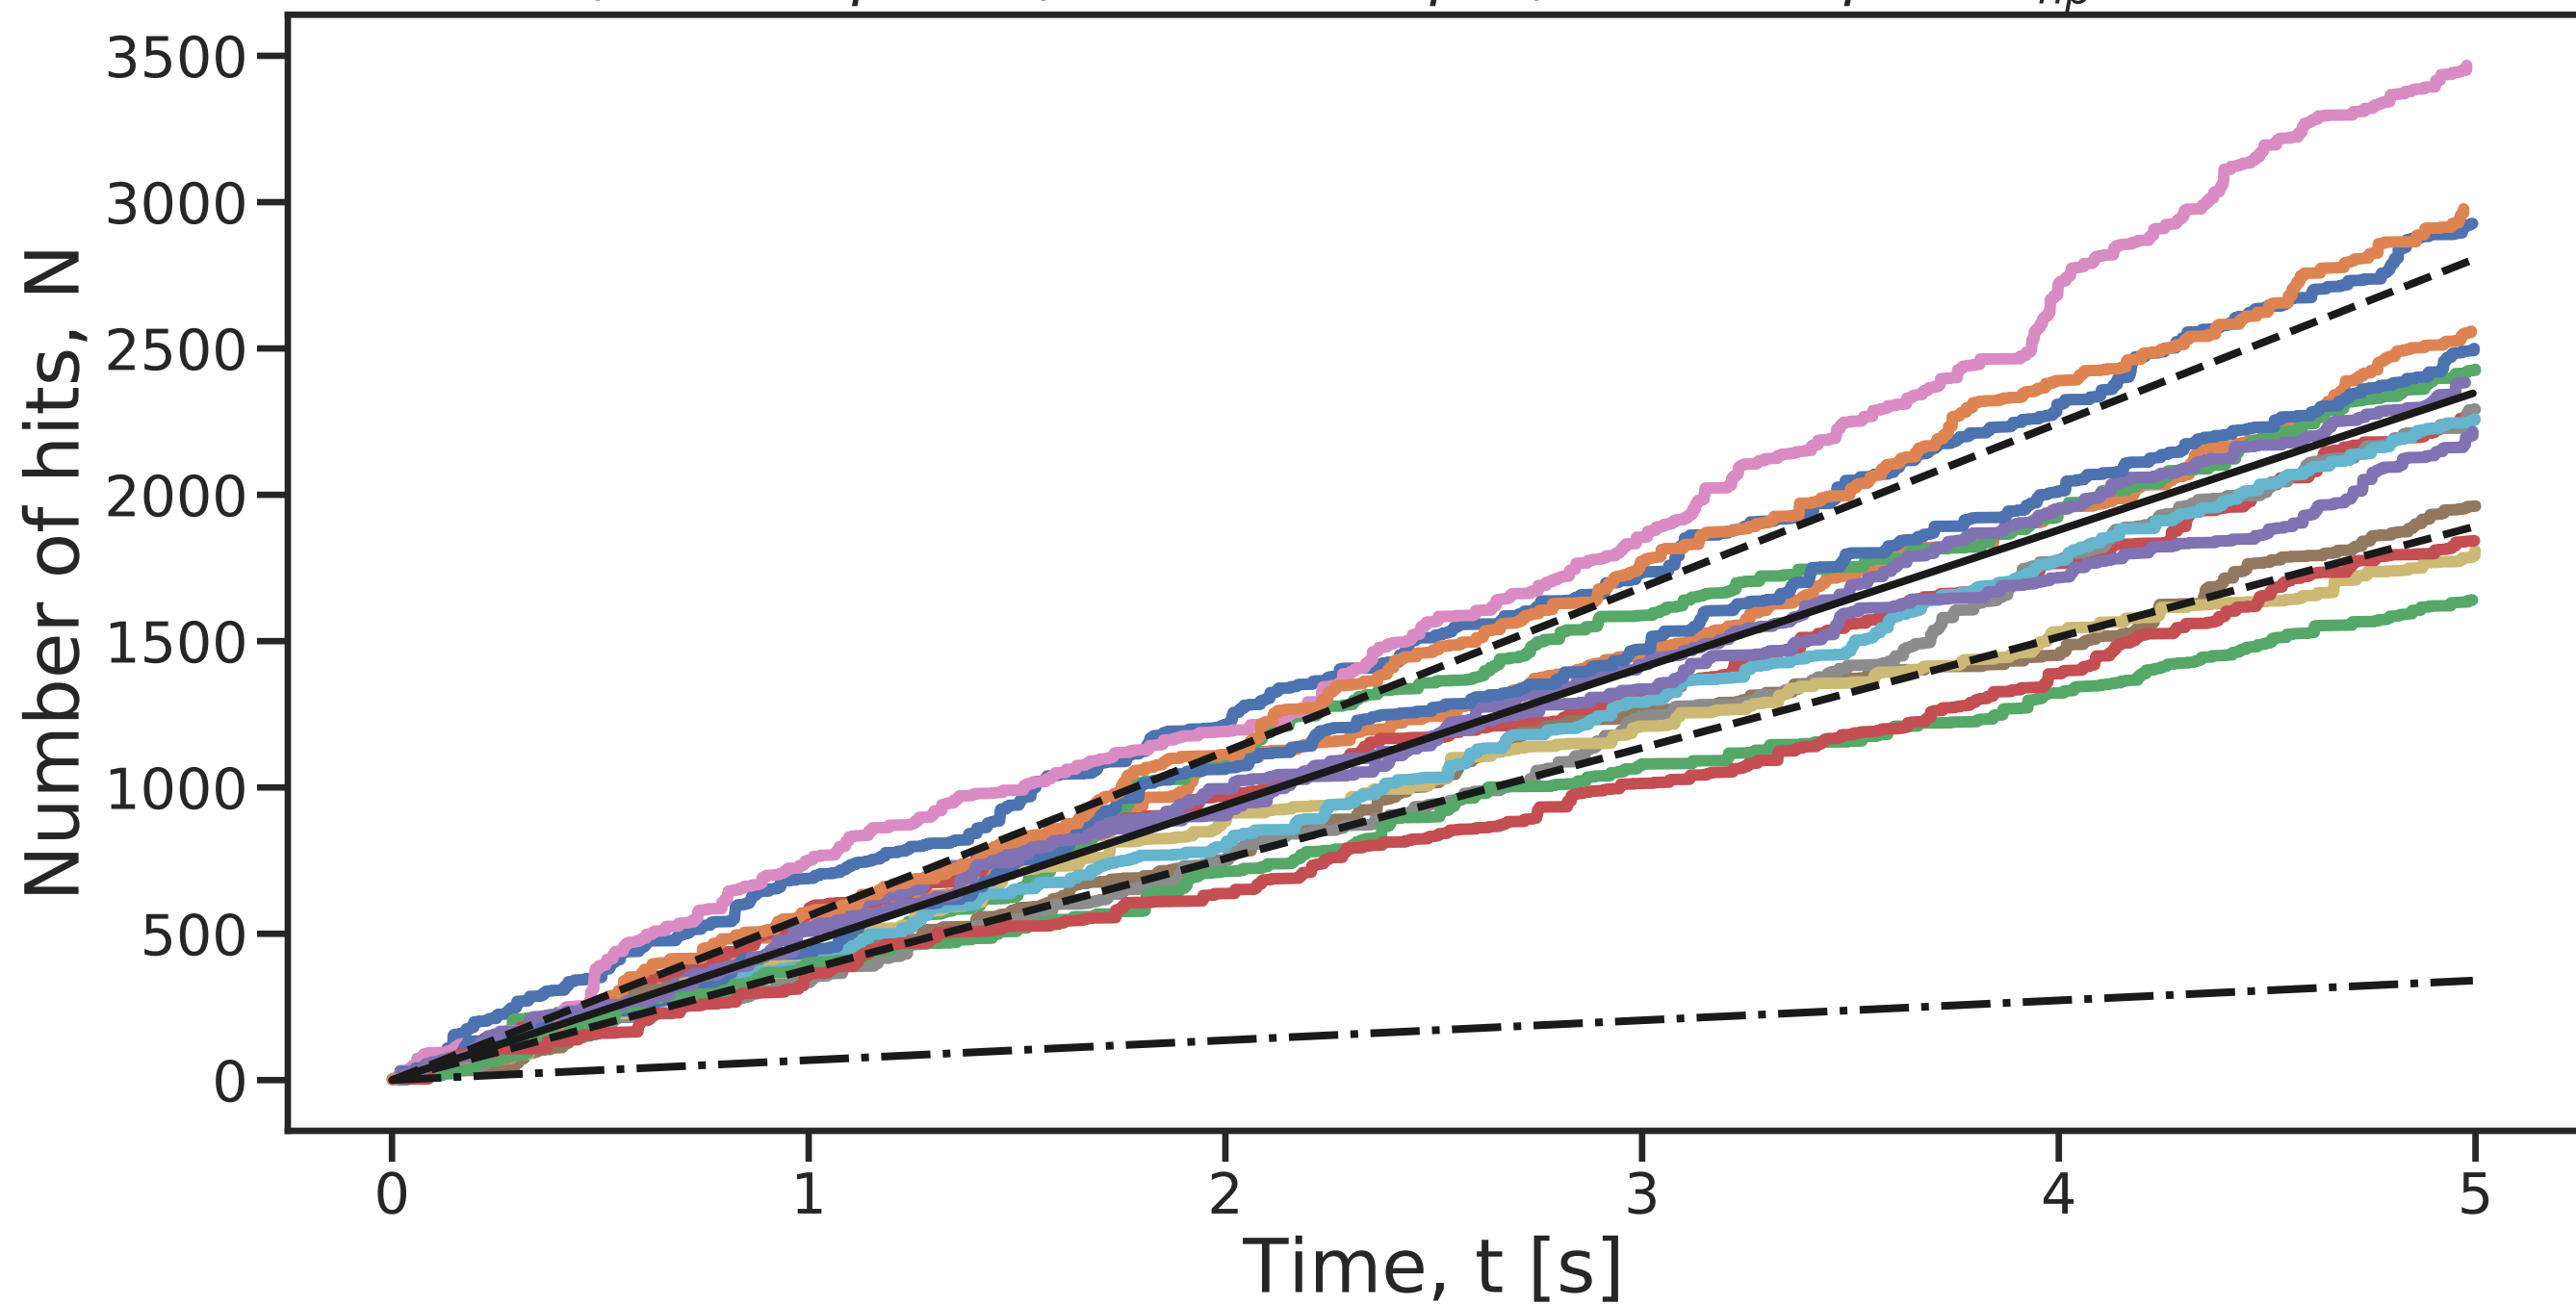

$c = 1.0 \text{ nM}; D = 80 \text{ } \mu\text{m}^2/\text{s}; R = 0.125 \text{ } \mu\text{m}; \Delta t = 1.0 \text{ } \mu\text{s} \langle N_{np} \rangle = 385.0 \pm 61.9$

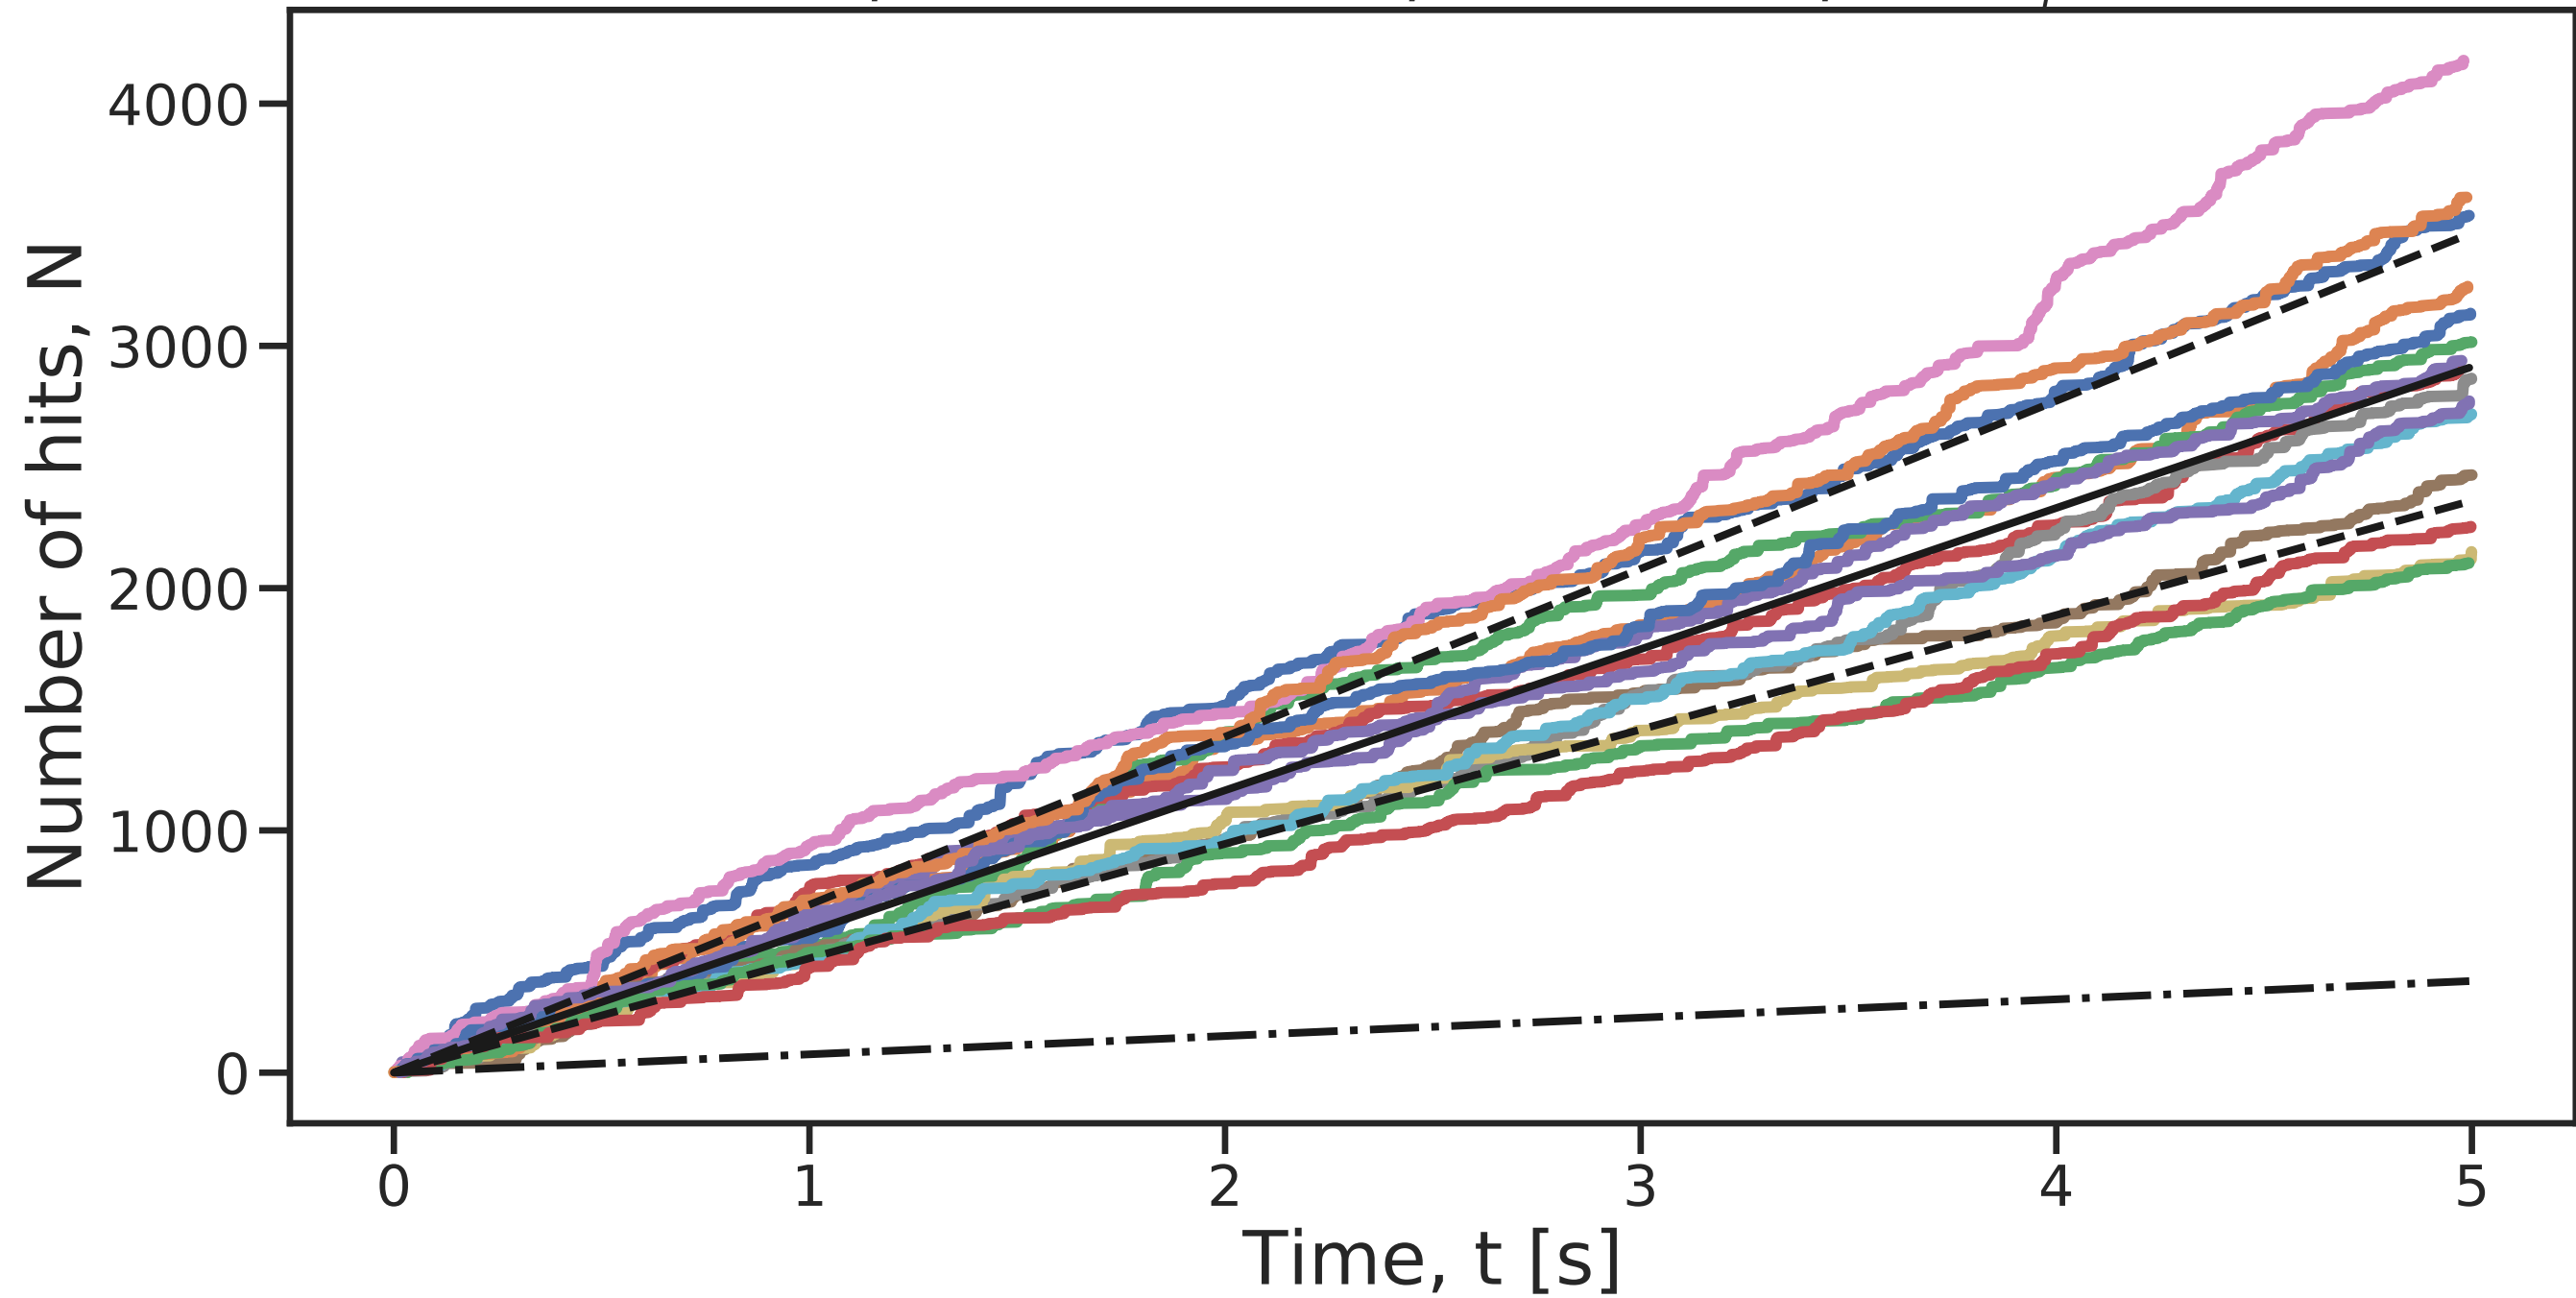

$c = 1.0 \text{ nM}$ ;  $D = 80 \text{ } \mu\text{m}^2/\text{s}$ ;  $R = 0.1375 \text{ } \mu\text{m}$ ;  $\Delta t = 1.0 \text{ } \mu\text{s}$   $\langle N_{np} \rangle = 424.6 \pm 66.7$

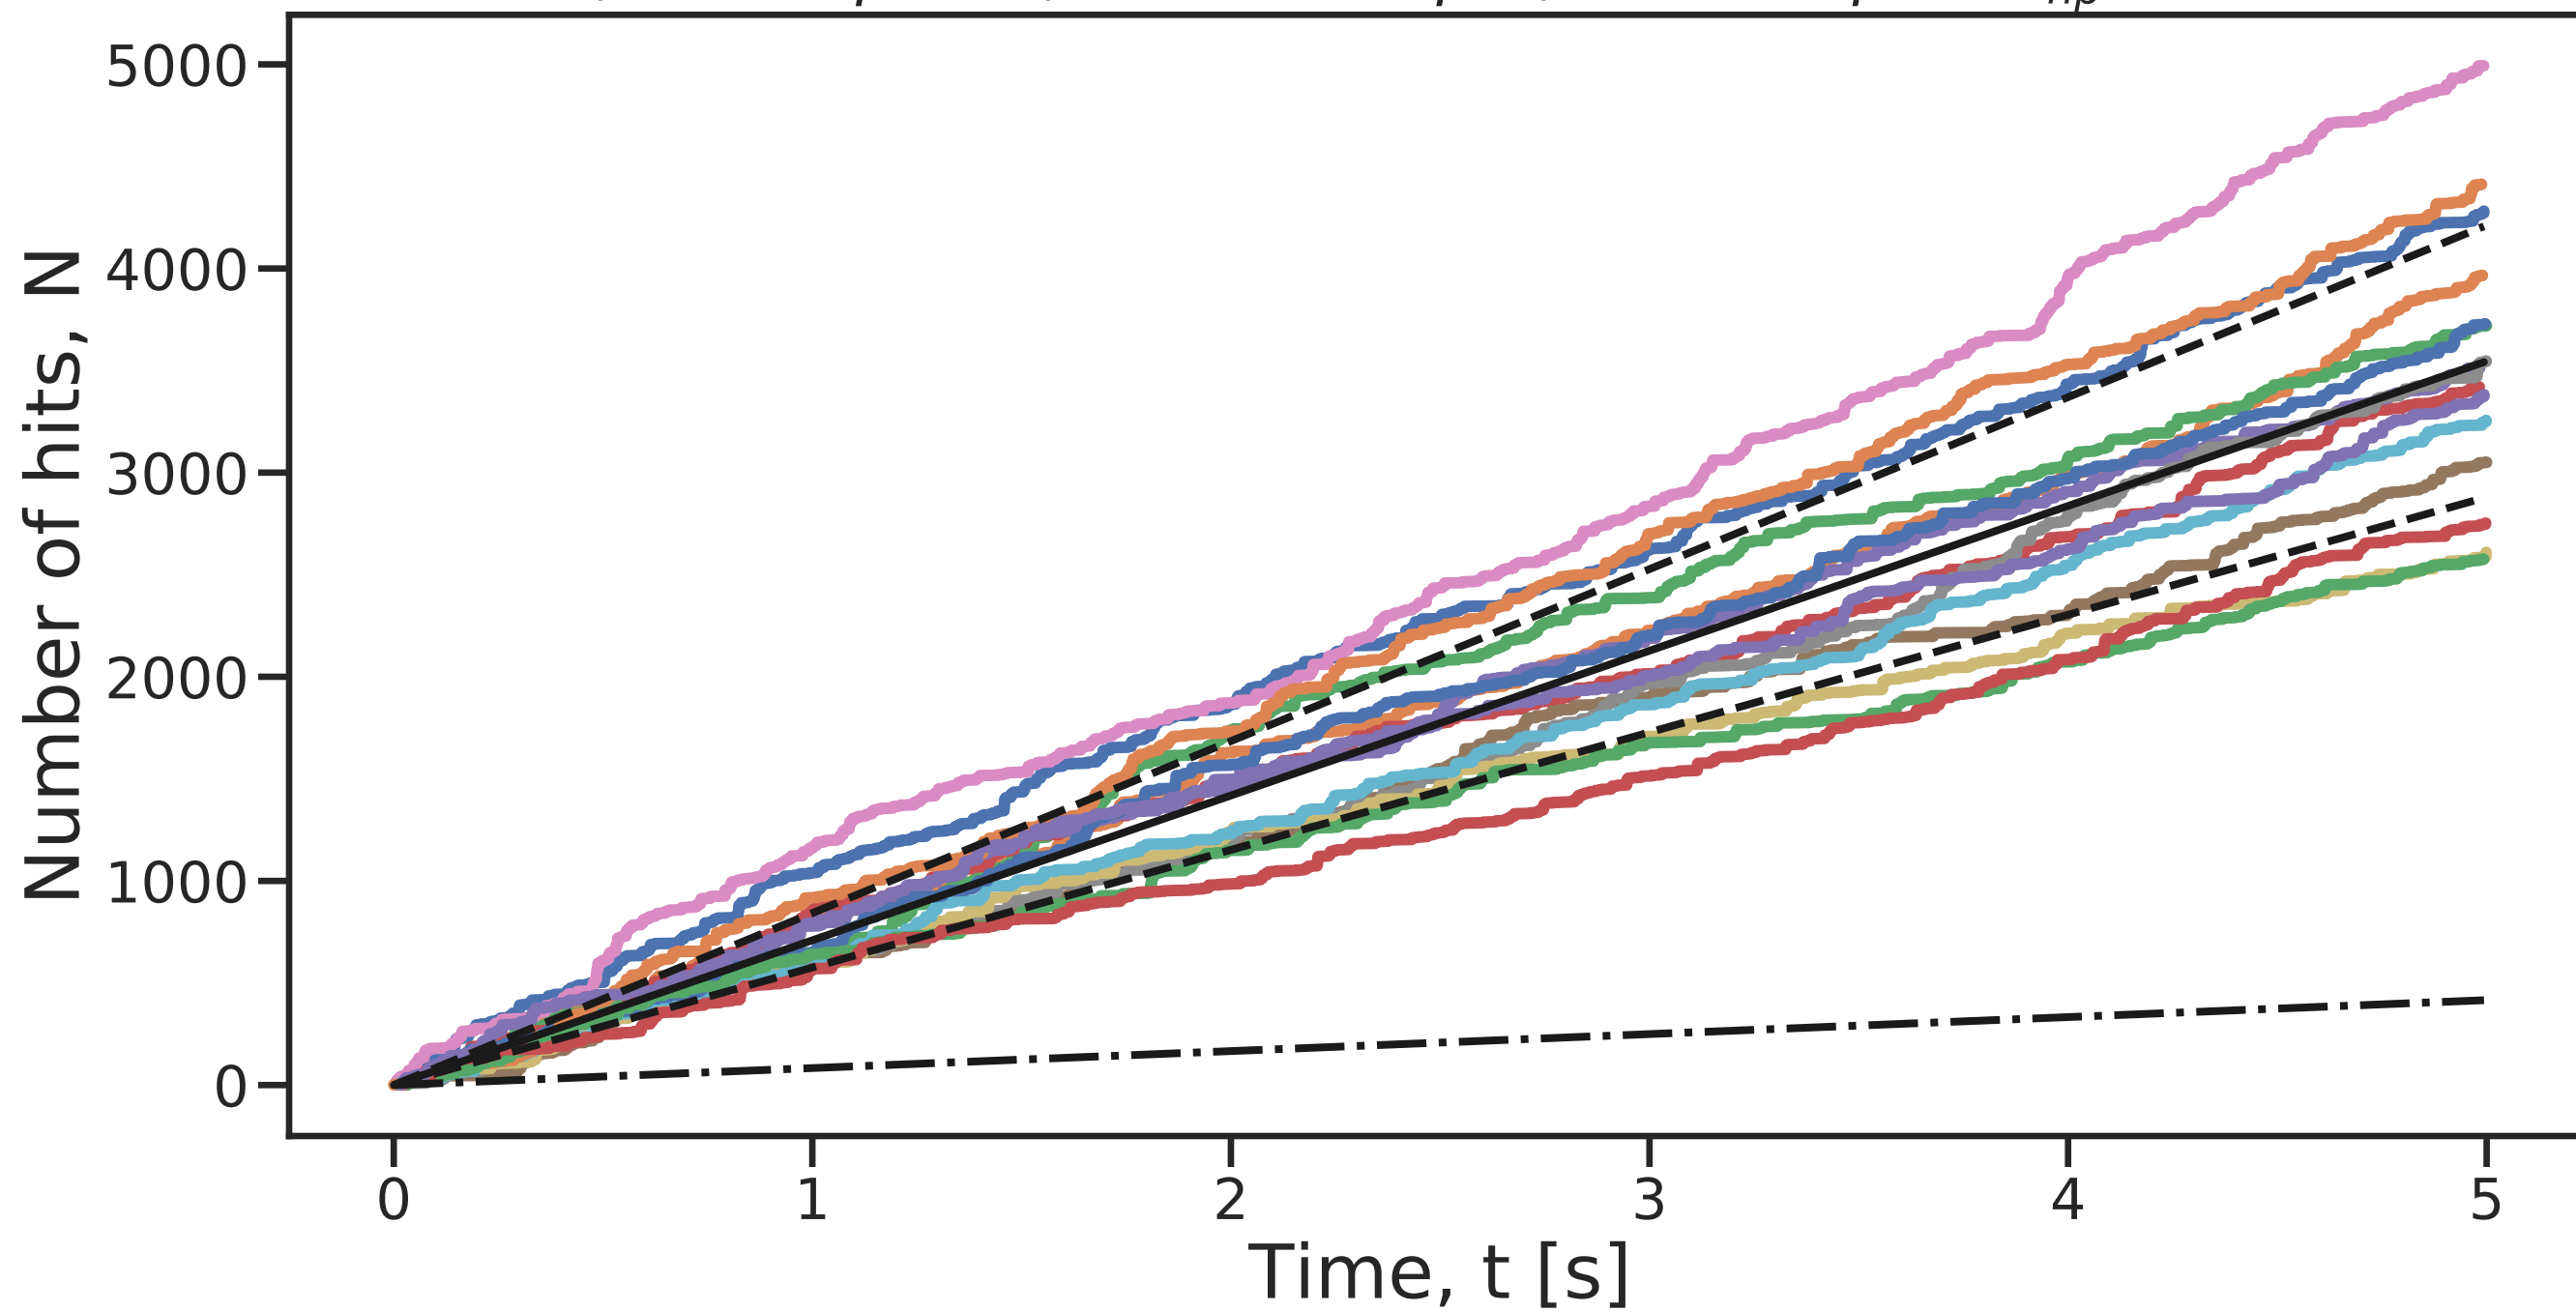

$c = 1.0 \text{ nM}; D = 80 \text{ } \mu\text{m}^2/\text{s}; R = 0.15 \text{ } \mu\text{m}; \Delta t = 1.0 \text{ } \mu\text{s} \langle N_{np} \rangle = 465.9 \pm 72.6$

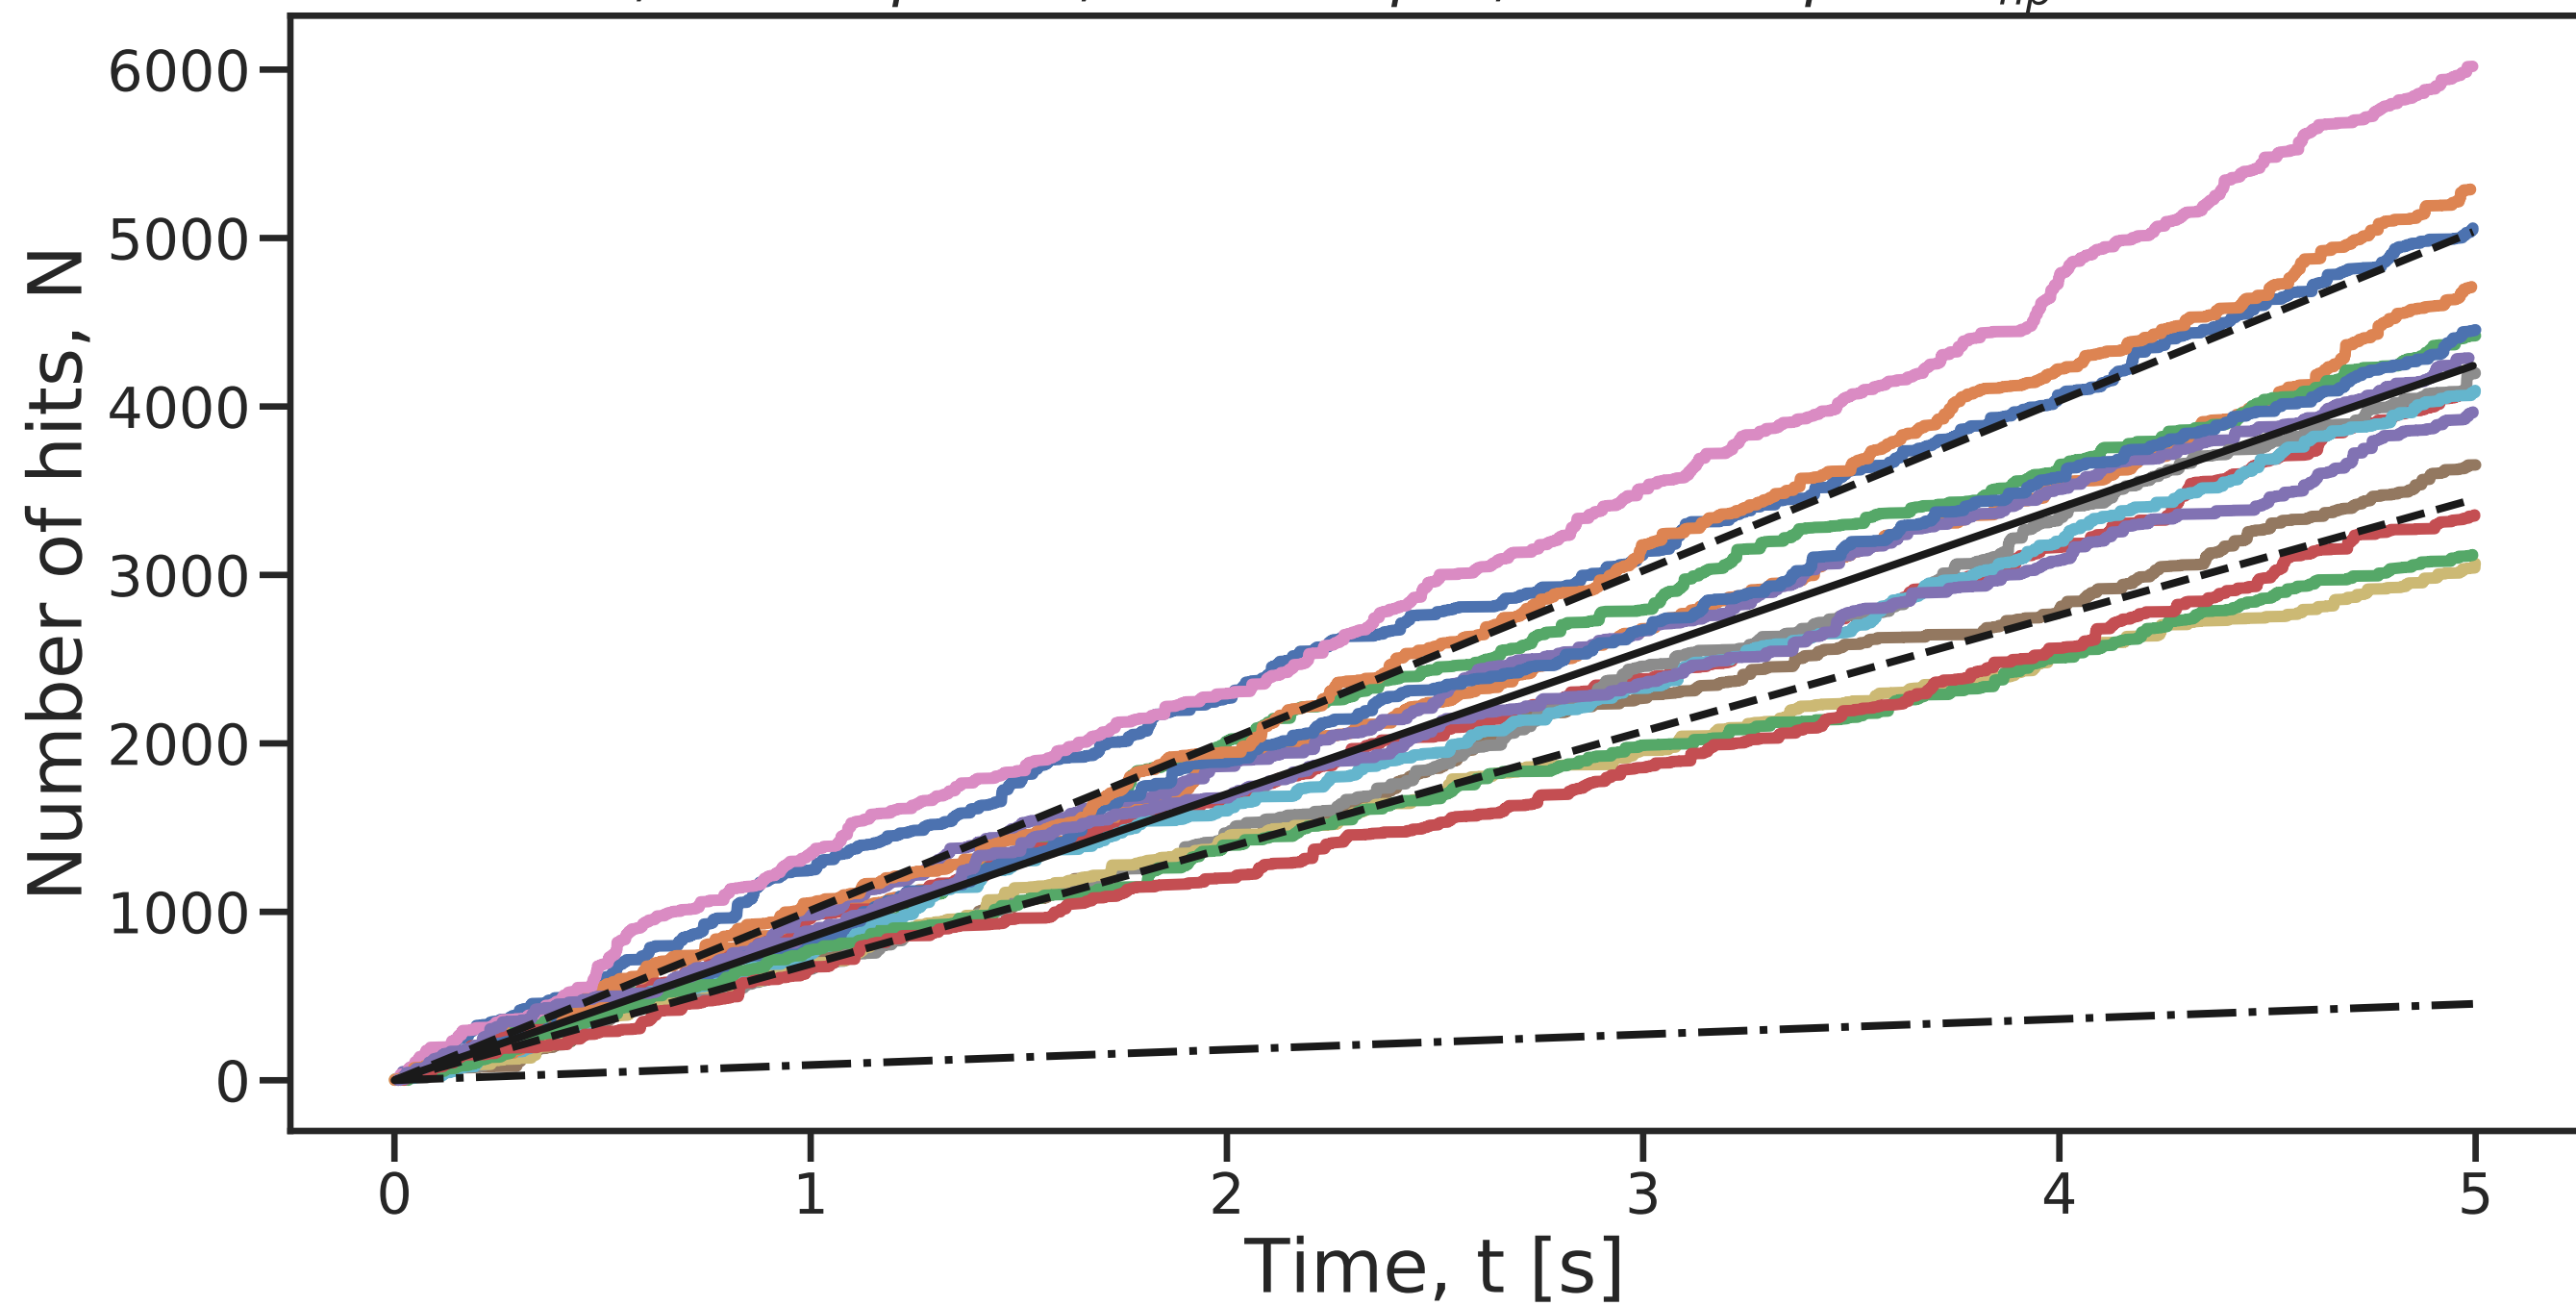

$c = 1.0 \text{ nM}$ ;  $D = 80 \text{ } \mu\text{m}^2/\text{s}$ ;  $R = 0.1625 \text{ } \mu\text{m}$ ;  $\Delta t = 1.0 \text{ } \mu\text{s}$   $\langle N_{np} \rangle = 509.8 \pm 77.3$

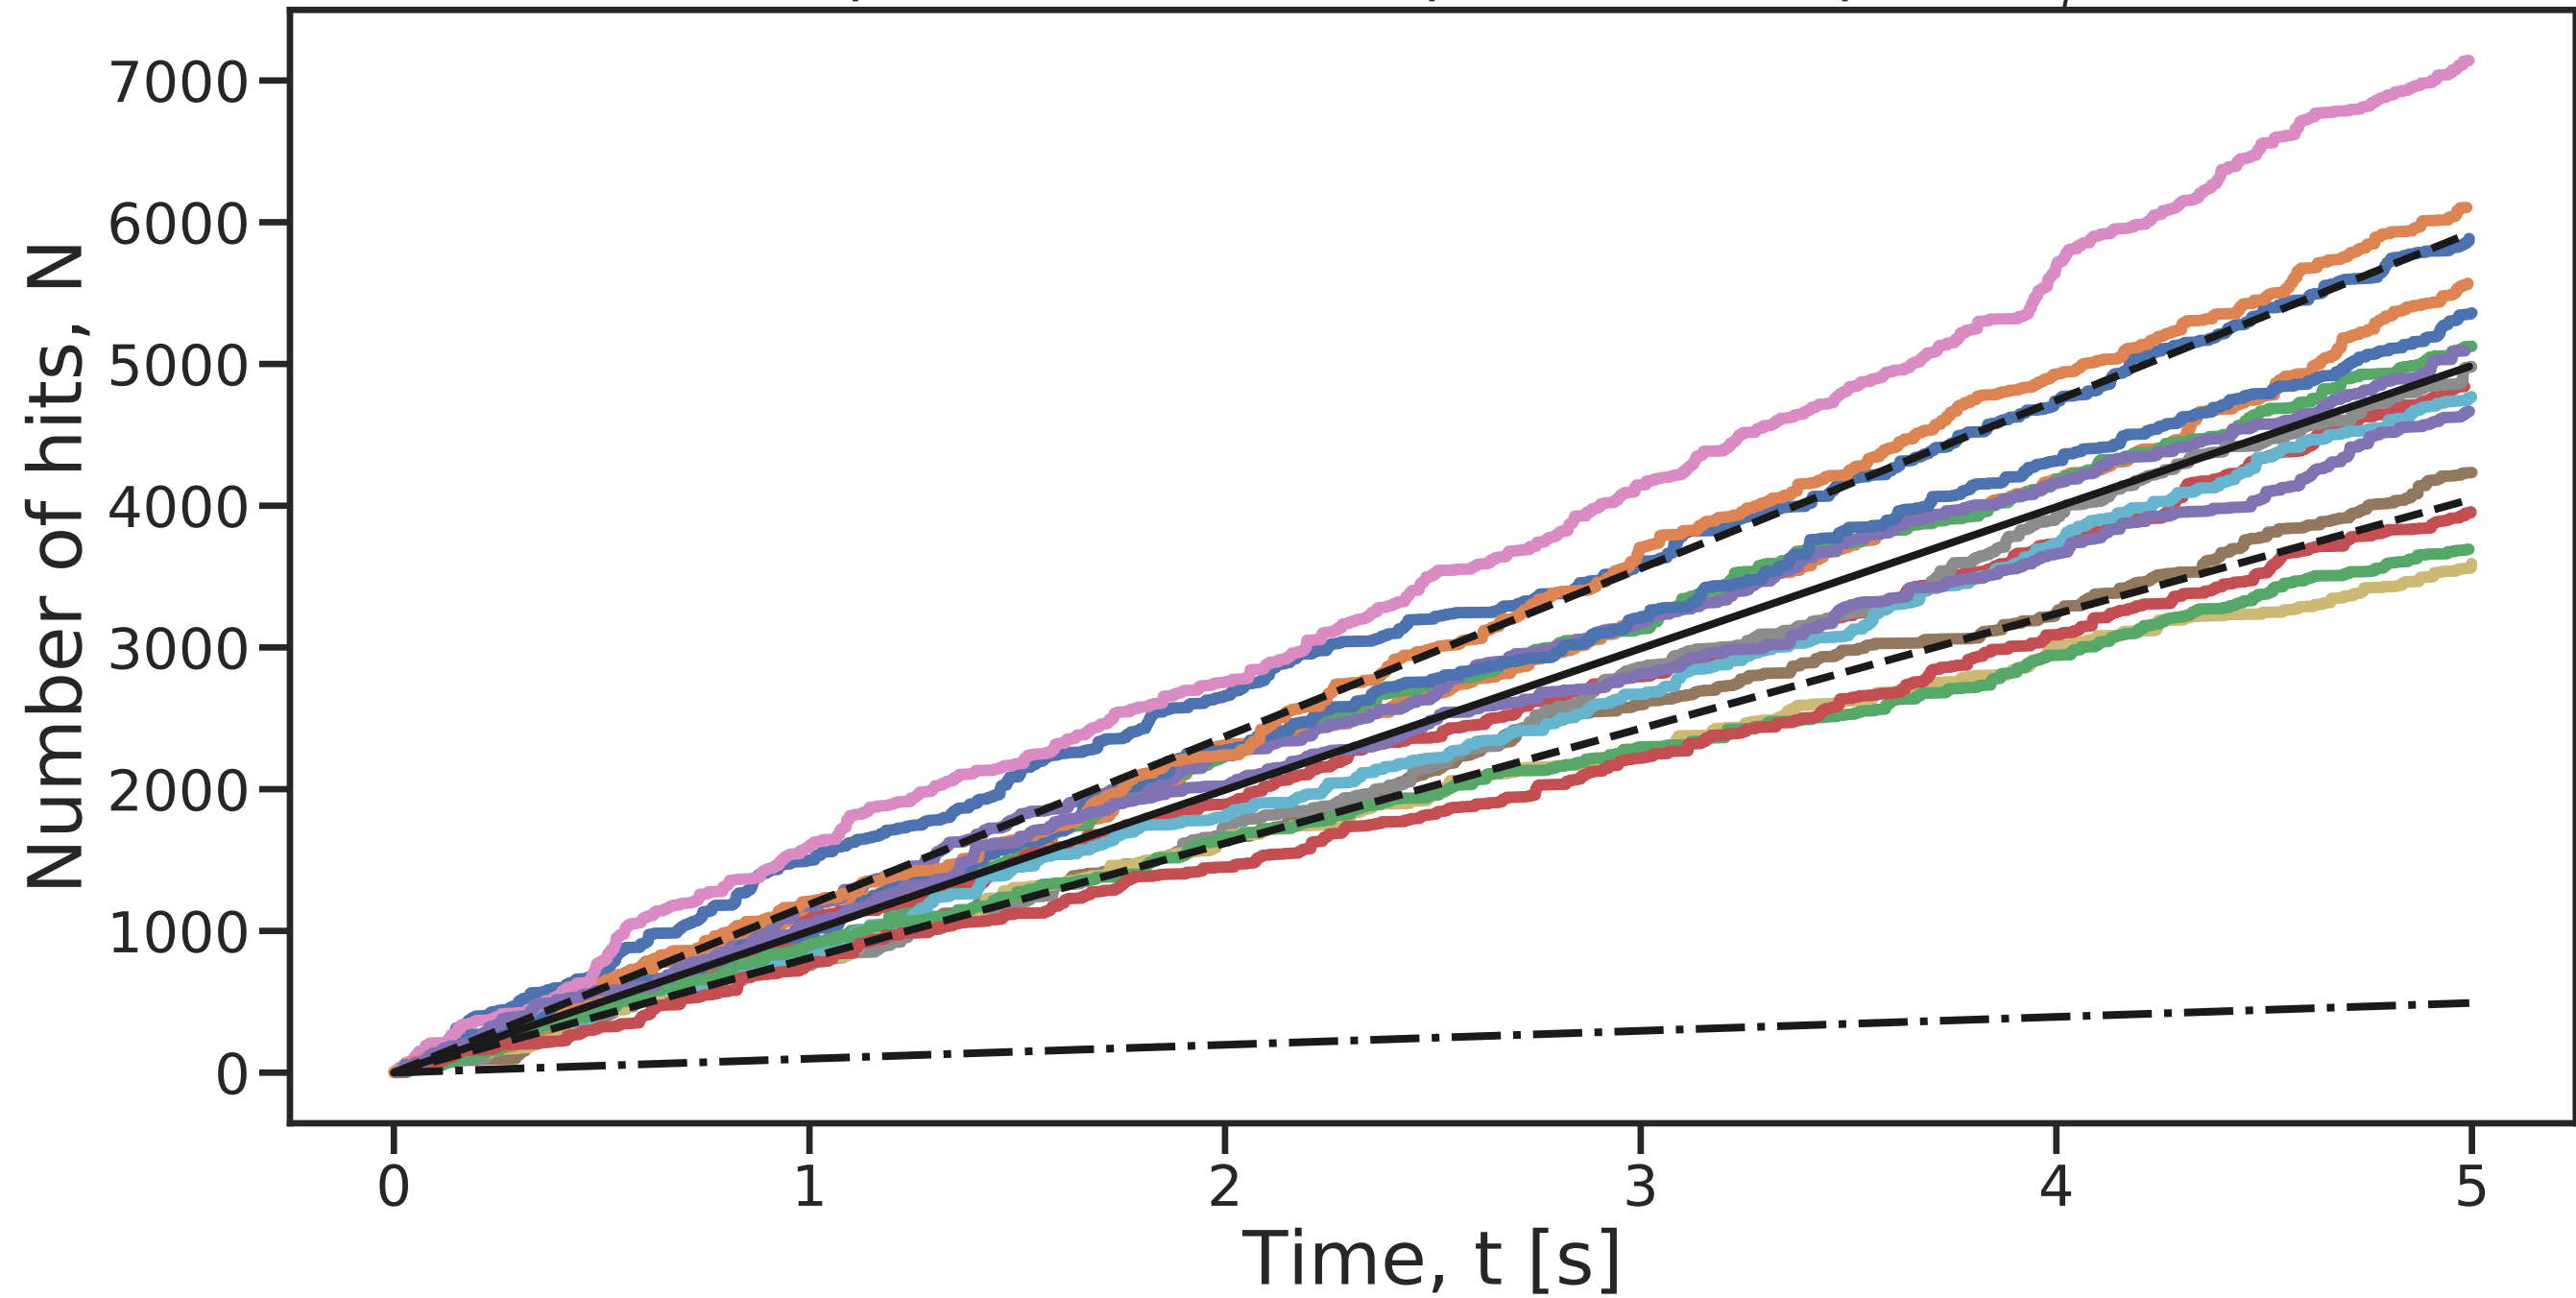

$c = 1.0 \text{ nM}; D = 80 \text{ } \mu\text{m}^2/\text{s}; R = 0.175 \text{ } \mu\text{m}; \Delta t = 1.0 \text{ } \mu\text{s} \langle N_{np} \rangle = 550.6 \pm 82.0$

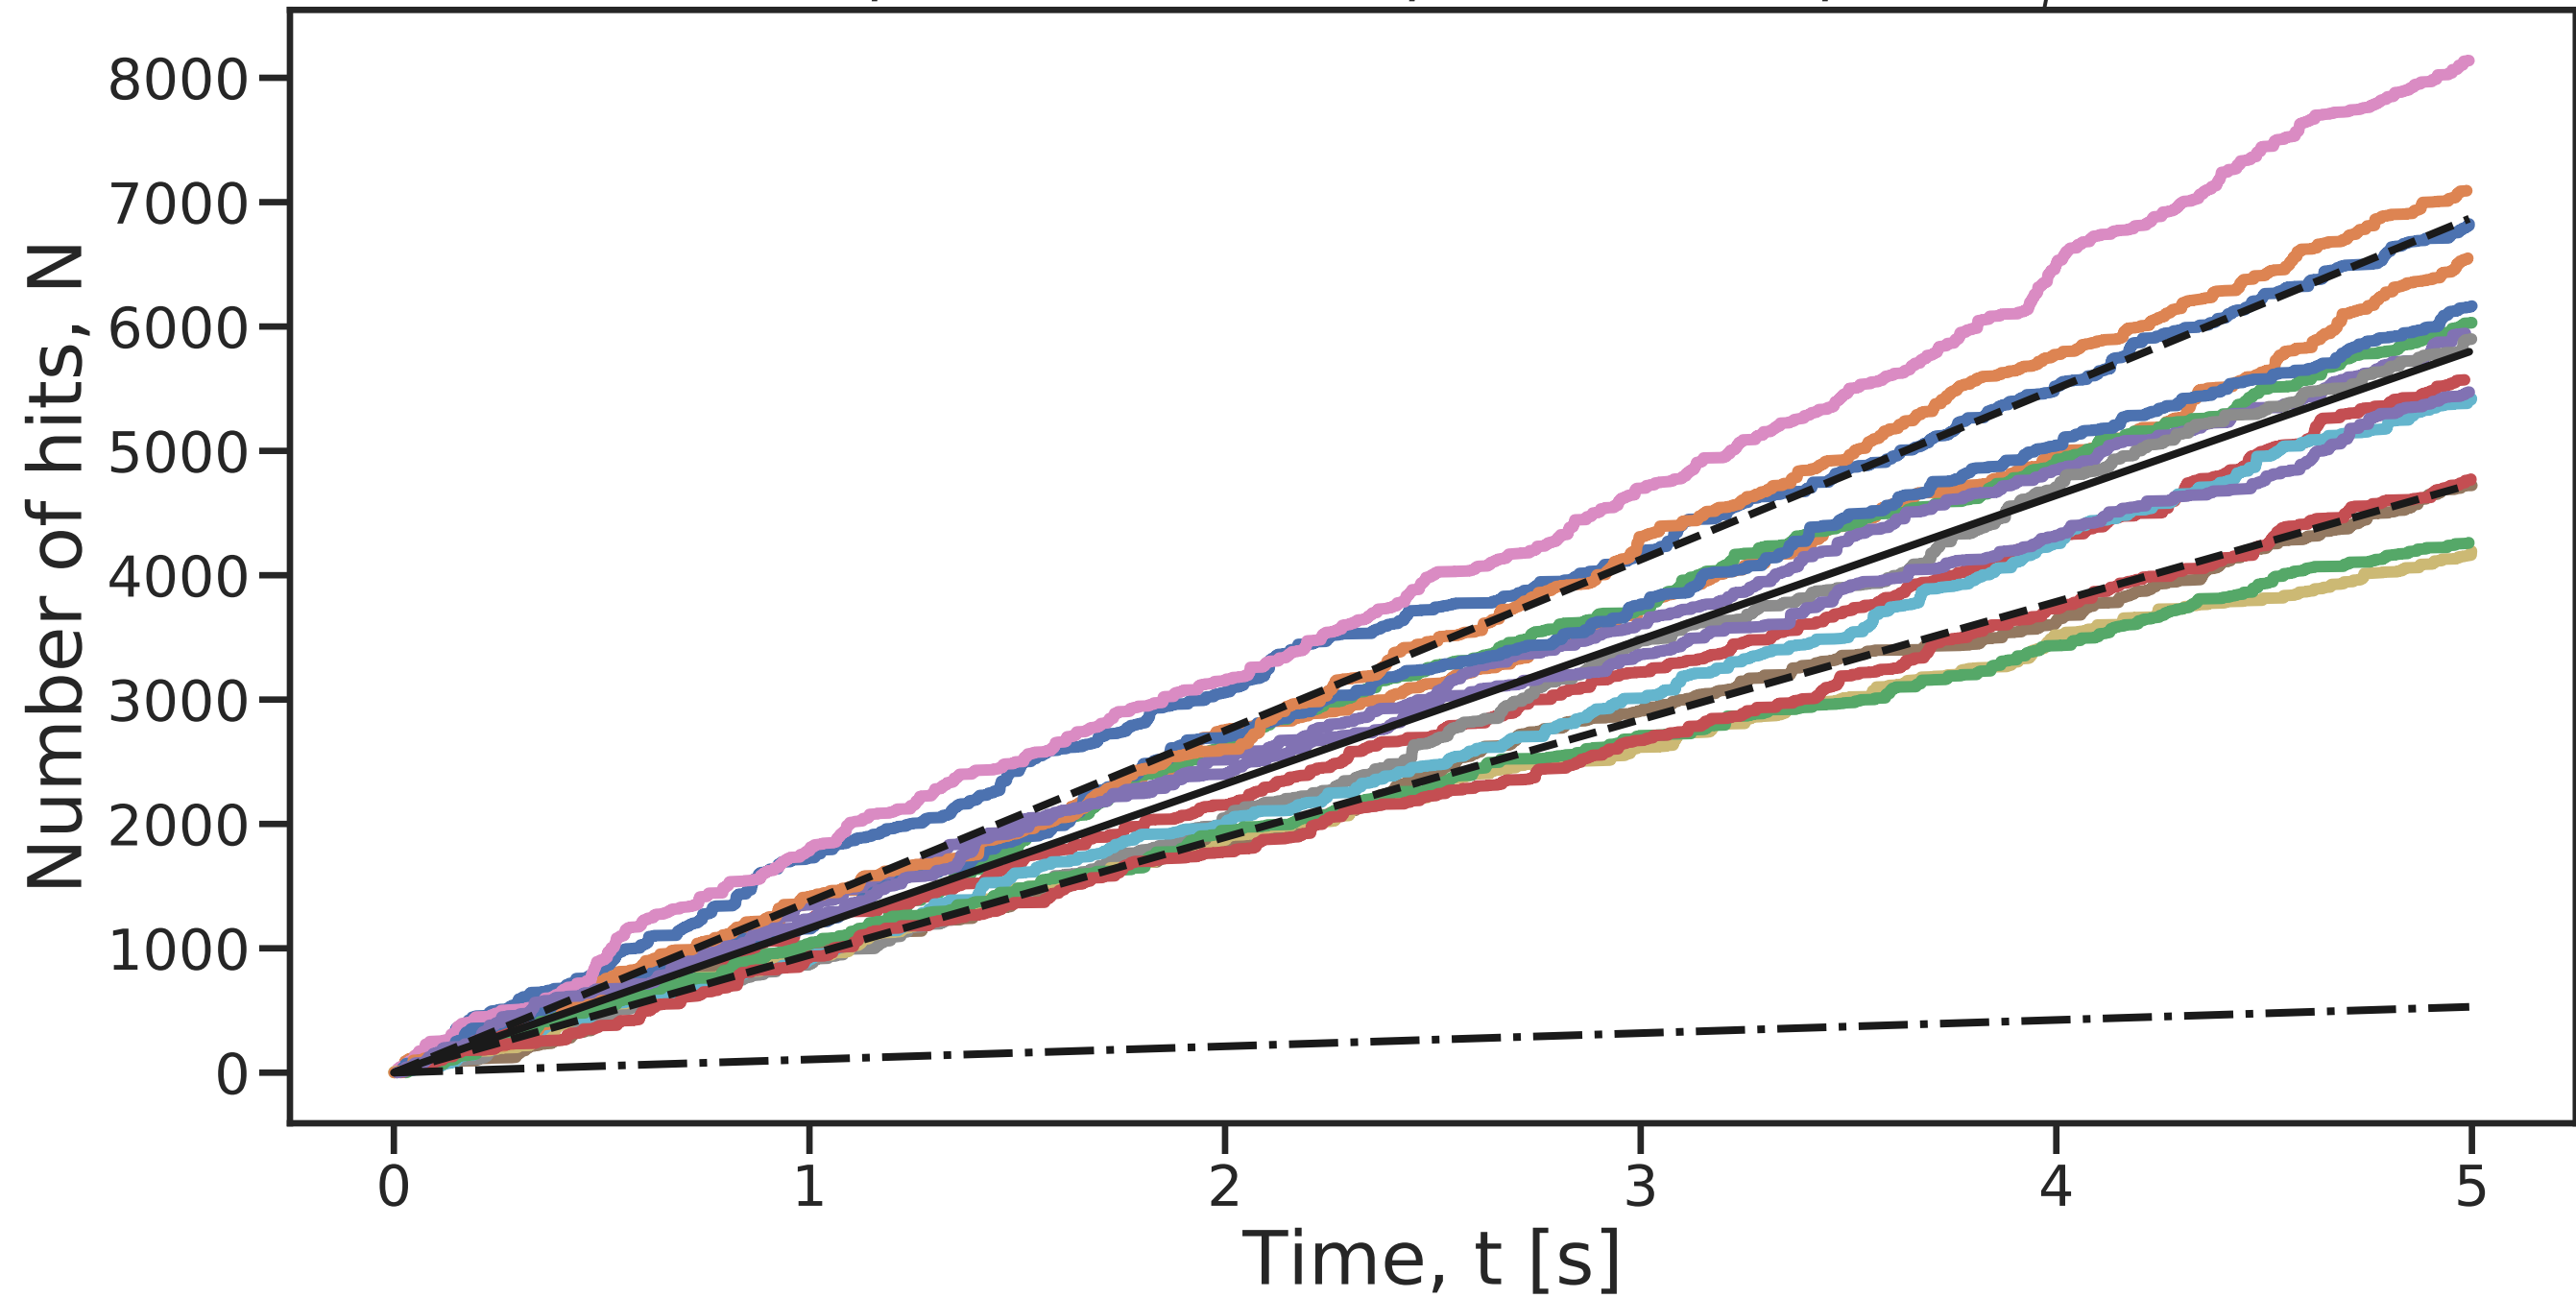

$c = 1.0 \text{ nM}$ ;  $D = 80 \text{ } \mu\text{m}^2/\text{s}$ ;  $R = 0.1875 \text{ } \mu\text{m}$ ;  $\Delta t = 1.0 \text{ } \mu\text{s}$   $\langle N_{np} \rangle = 585.8 \pm 84.1$

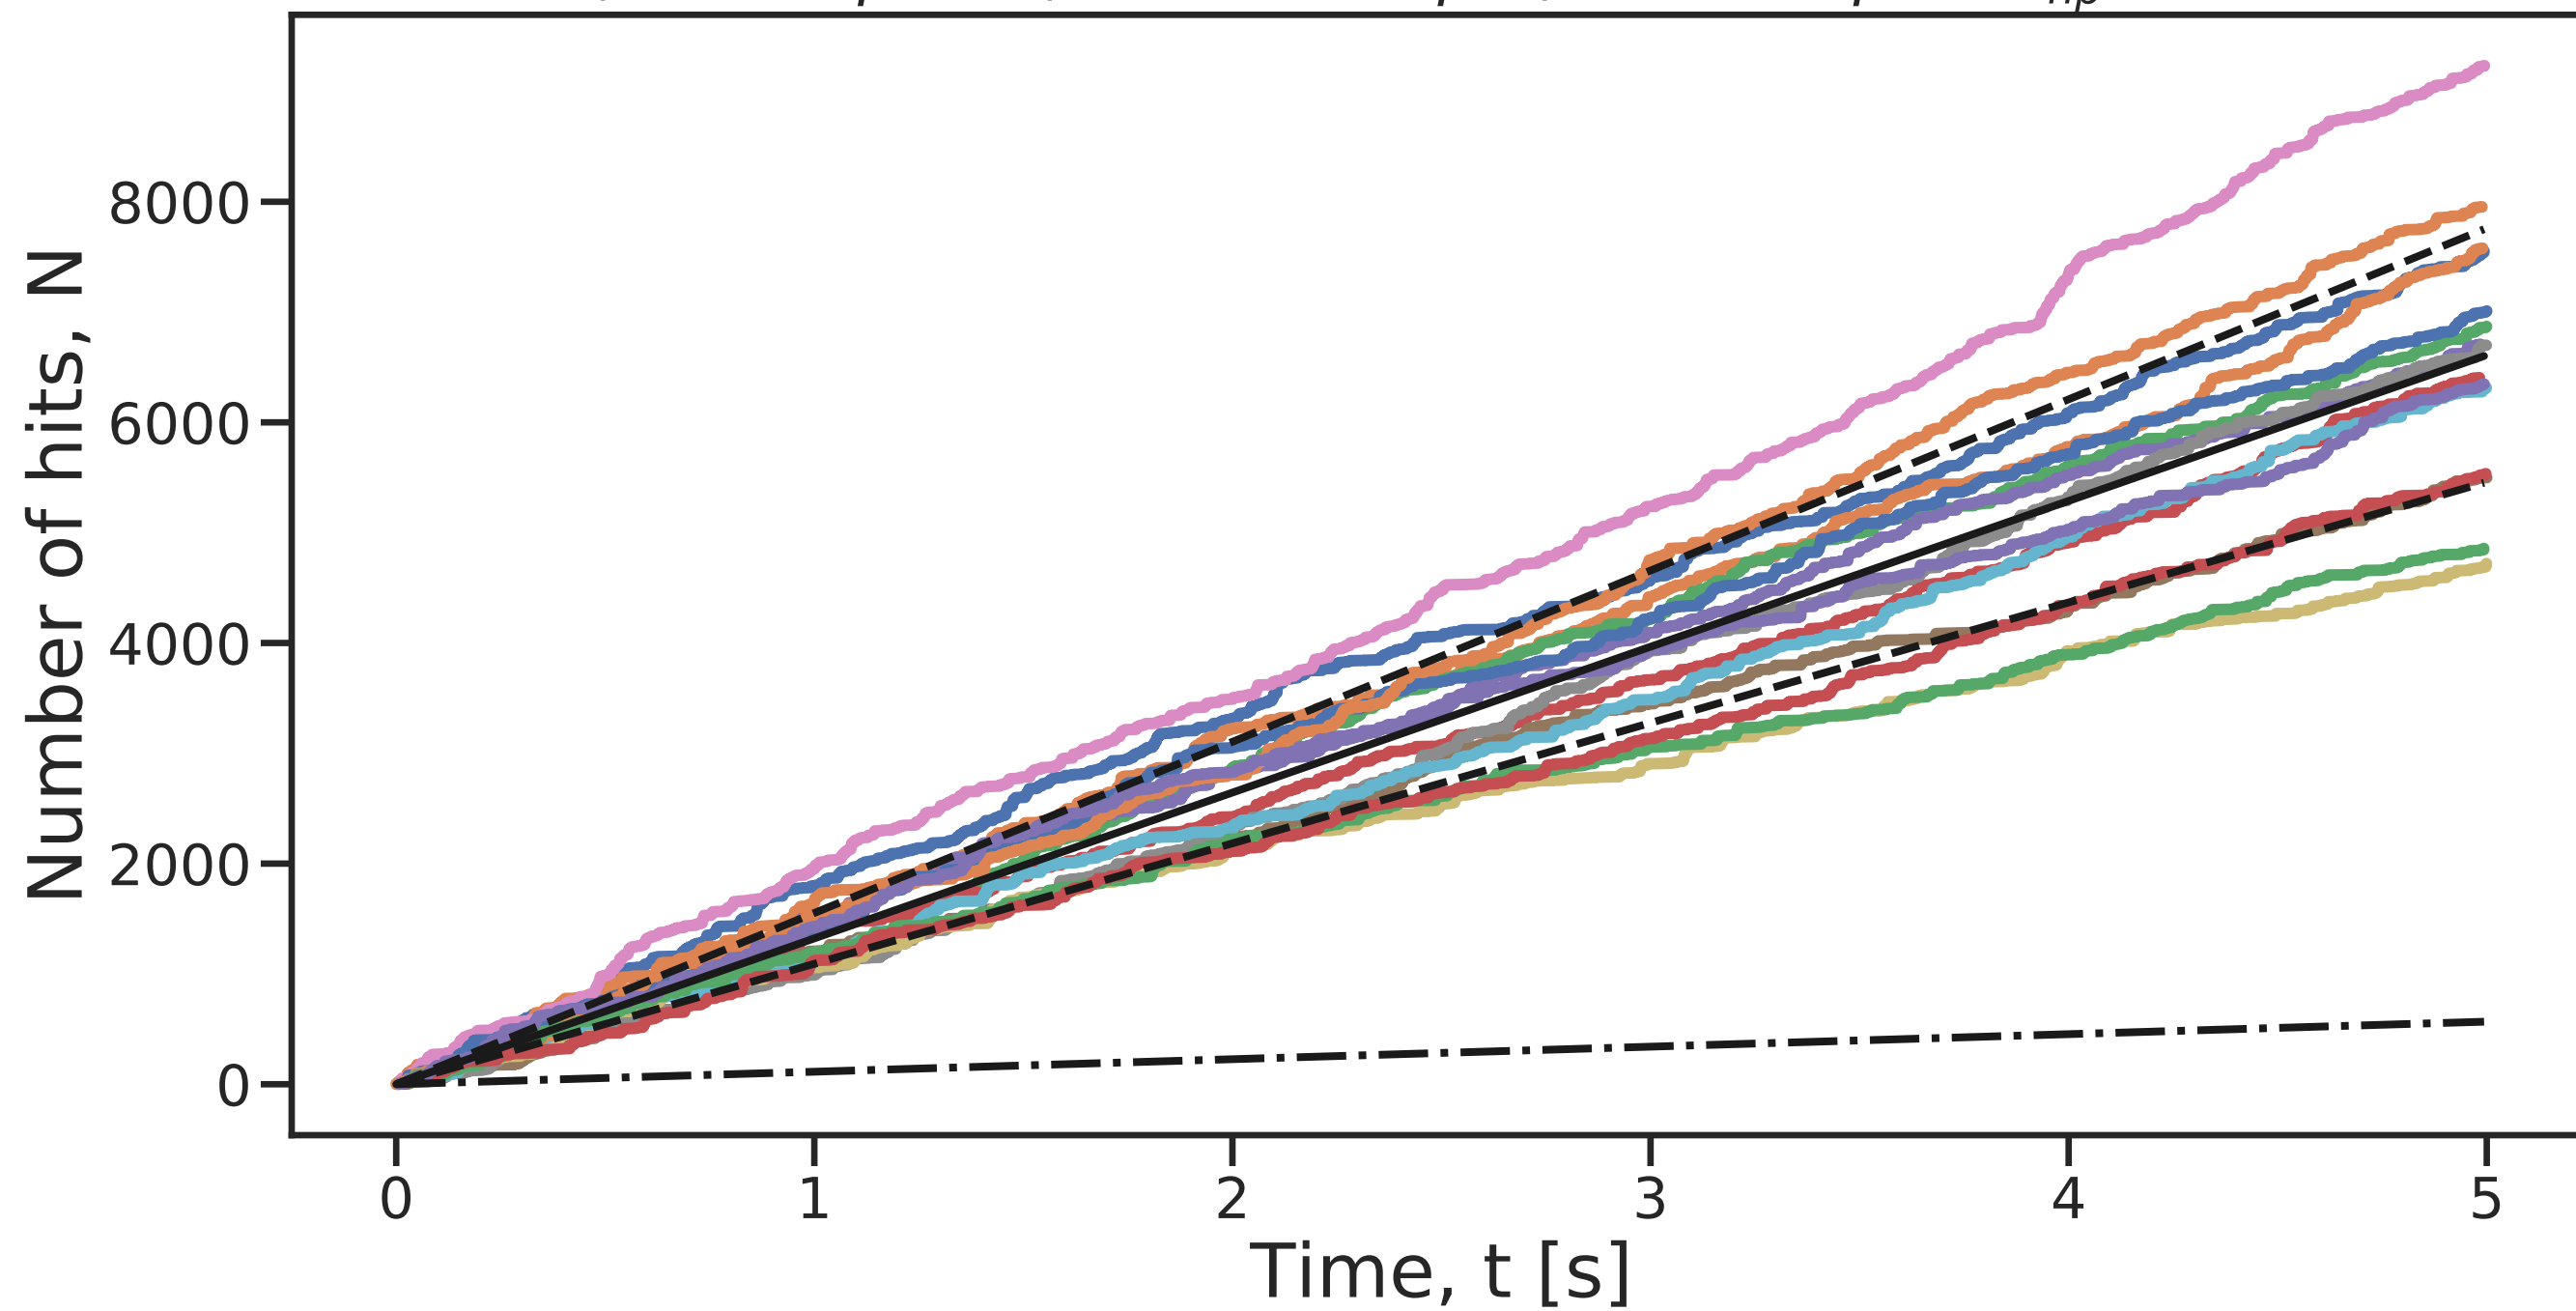

$c = 1.0 \text{ nM}$ ;  $D = 80 \text{ } \mu\text{m}^2/\text{s}$ ;  $R = 0.1 \text{ } \mu\text{m}$ ;  $\Delta t = 1.0 \text{ } \mu\text{s}$   $\langle N_{np} \rangle = 306.2 \pm 52.6$

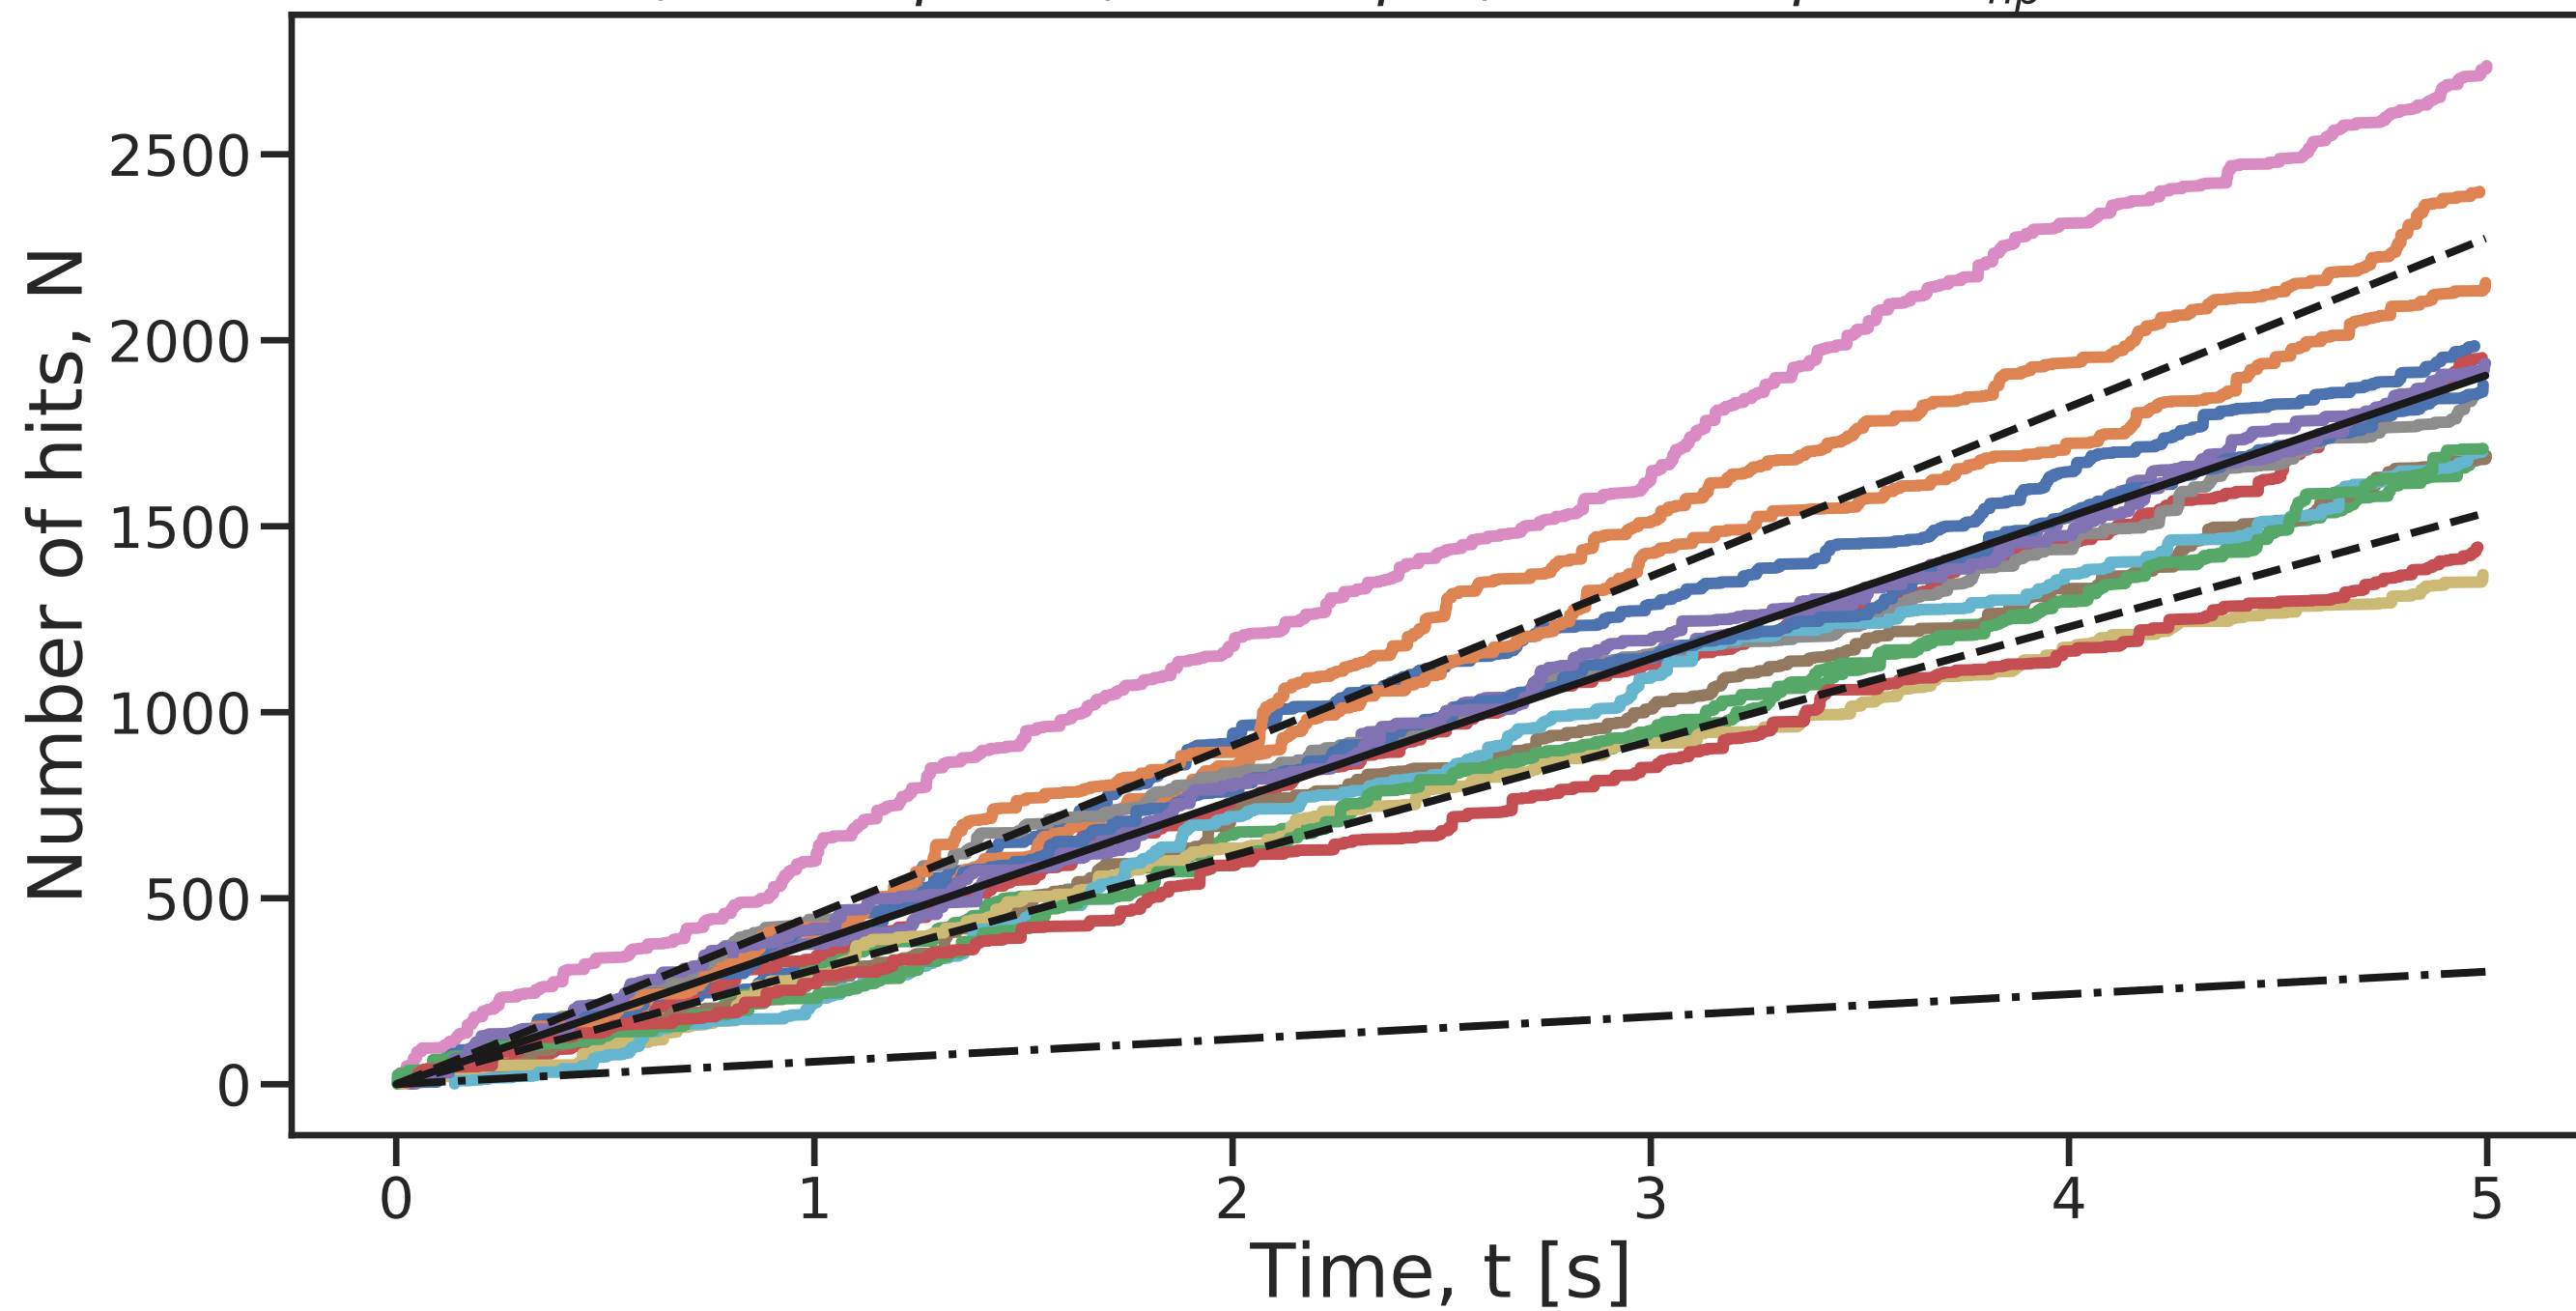



$c = 1.0 \text{ nM}; D = 80 \text{ } \mu\text{m}^2/\text{s}; R = 0.2 \text{ } \mu\text{m}; \Delta t = 1.0 \text{ } \mu\text{s} \langle N_{np} \rangle = 625.0 \pm 86.2$

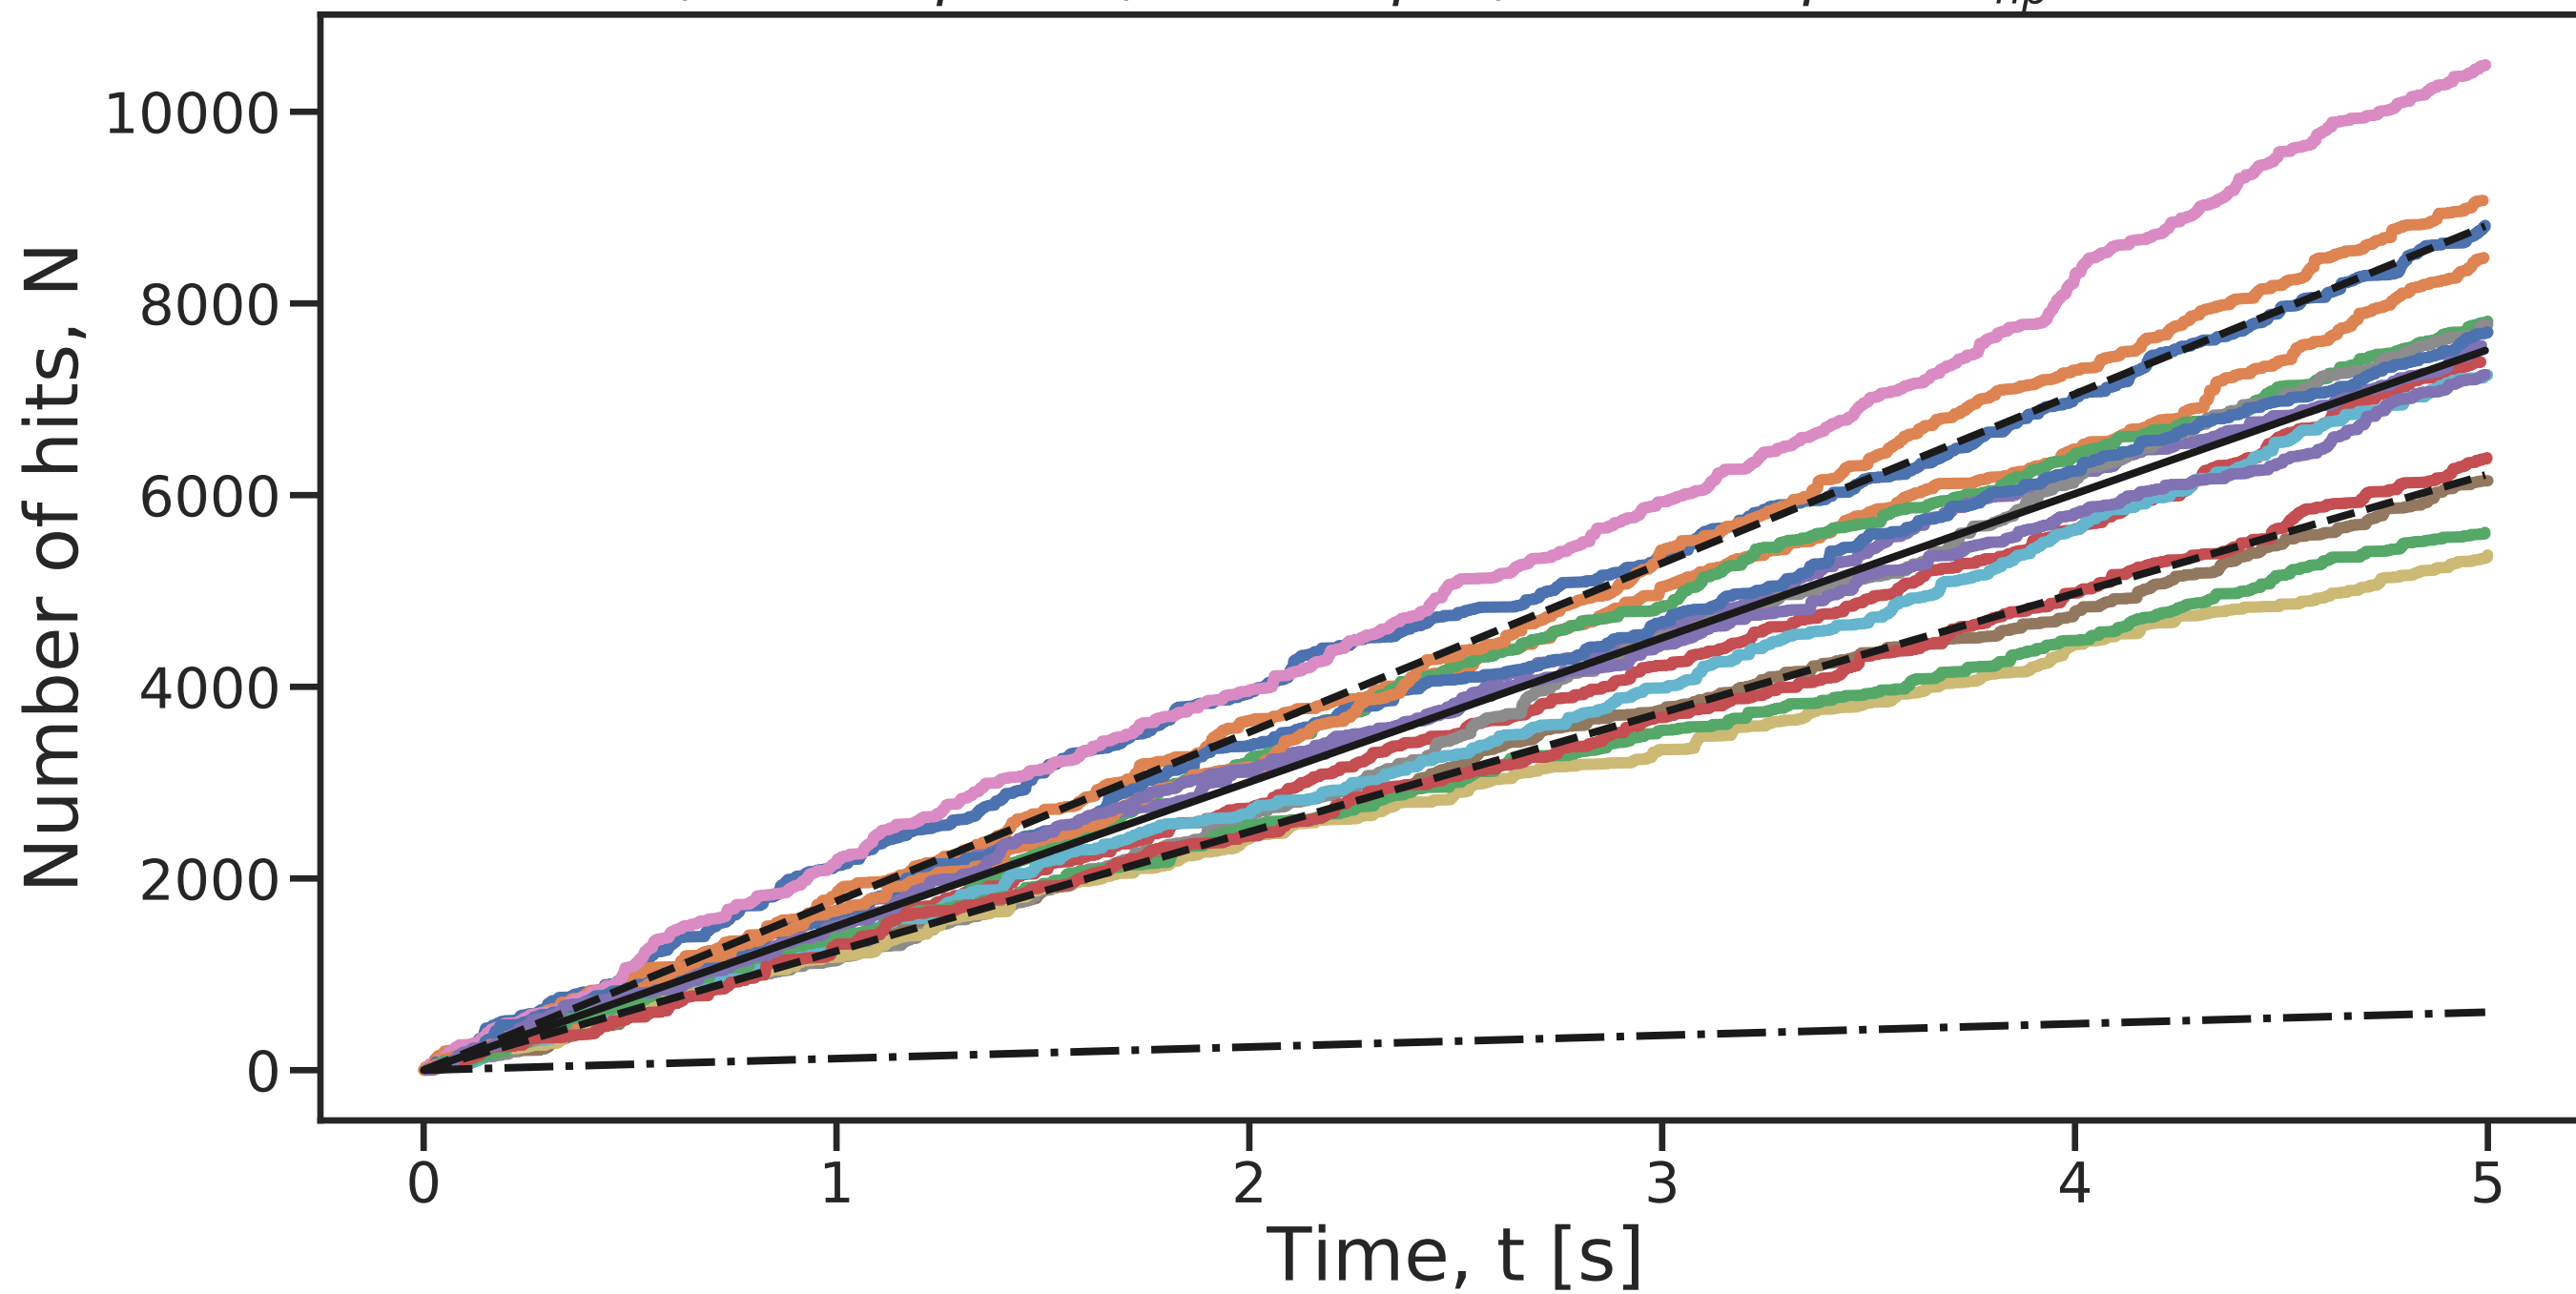

$c = 2.0 \text{ nM}$ ;  $D = 80 \text{ } \mu\text{m}^2/\text{s}$ ;  $R = 0.1 \text{ } \mu\text{m}$ ;  $\Delta t = 1.0 \text{ } \mu\text{s}$   $\langle N_{np} \rangle = 610.5 \pm 57.6$

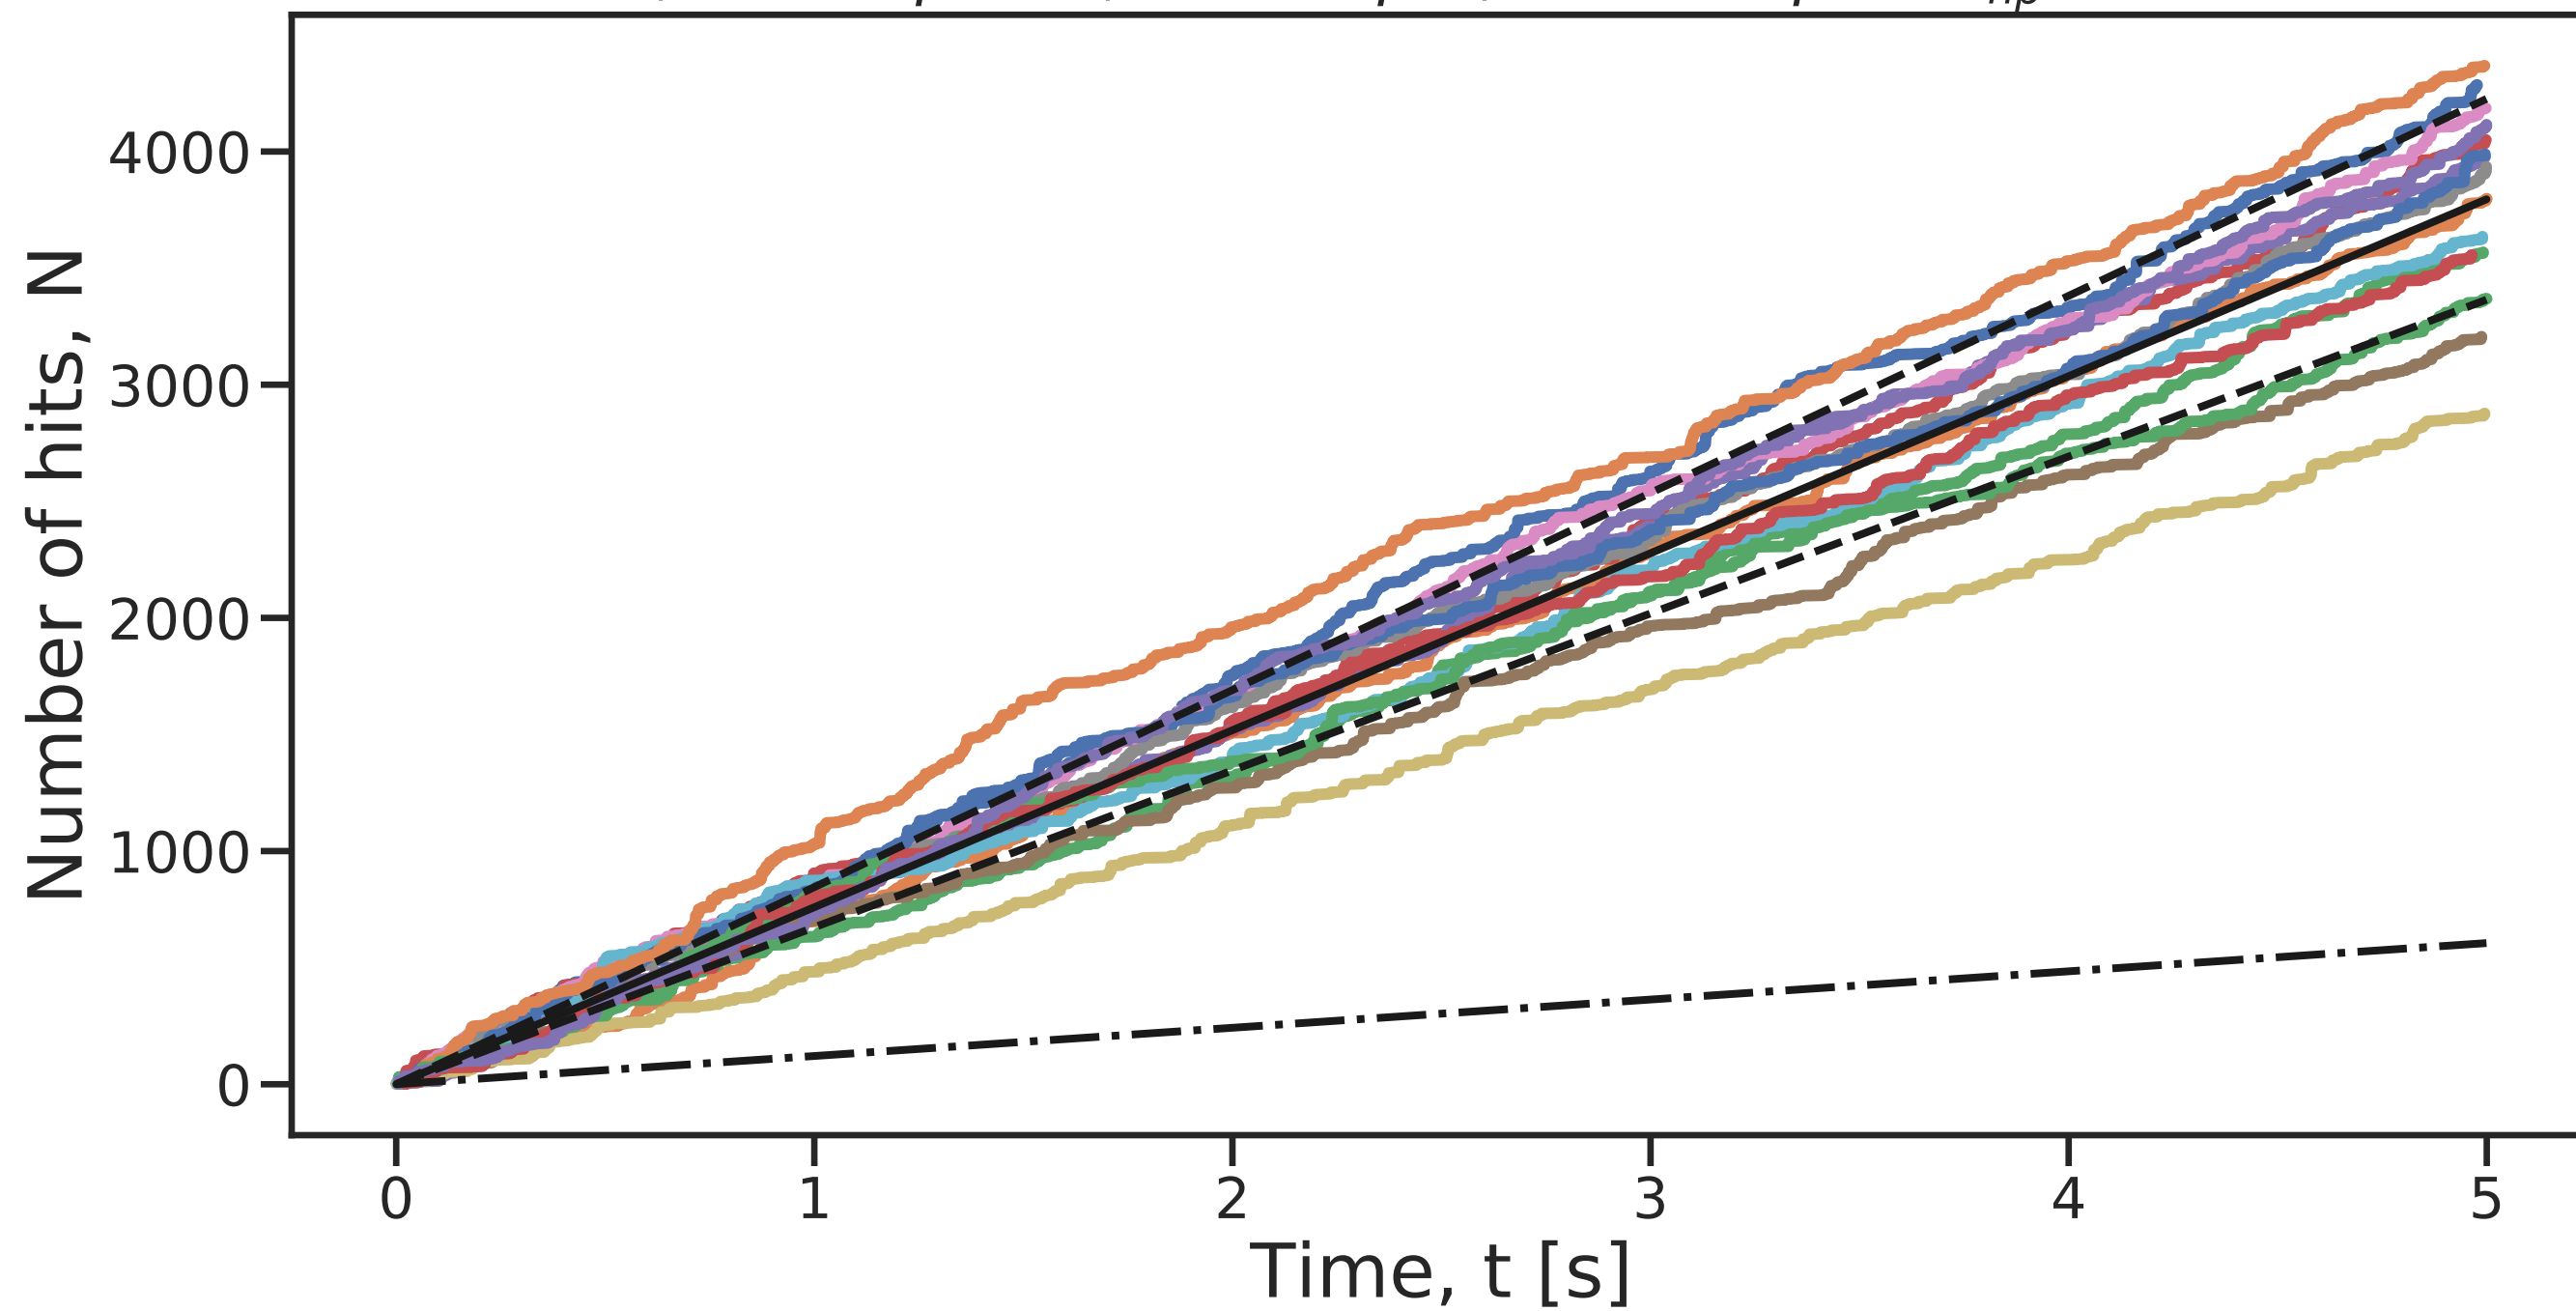

$c = 4.0 \text{ nM}; D = 80 \text{ } \mu\text{m}^2/\text{s}; R = 0.1 \text{ } \mu\text{m}; \Delta t = 1.0 \text{ } \mu\text{s} \langle N_{np} \rangle = 1233.3 \pm 91.2$

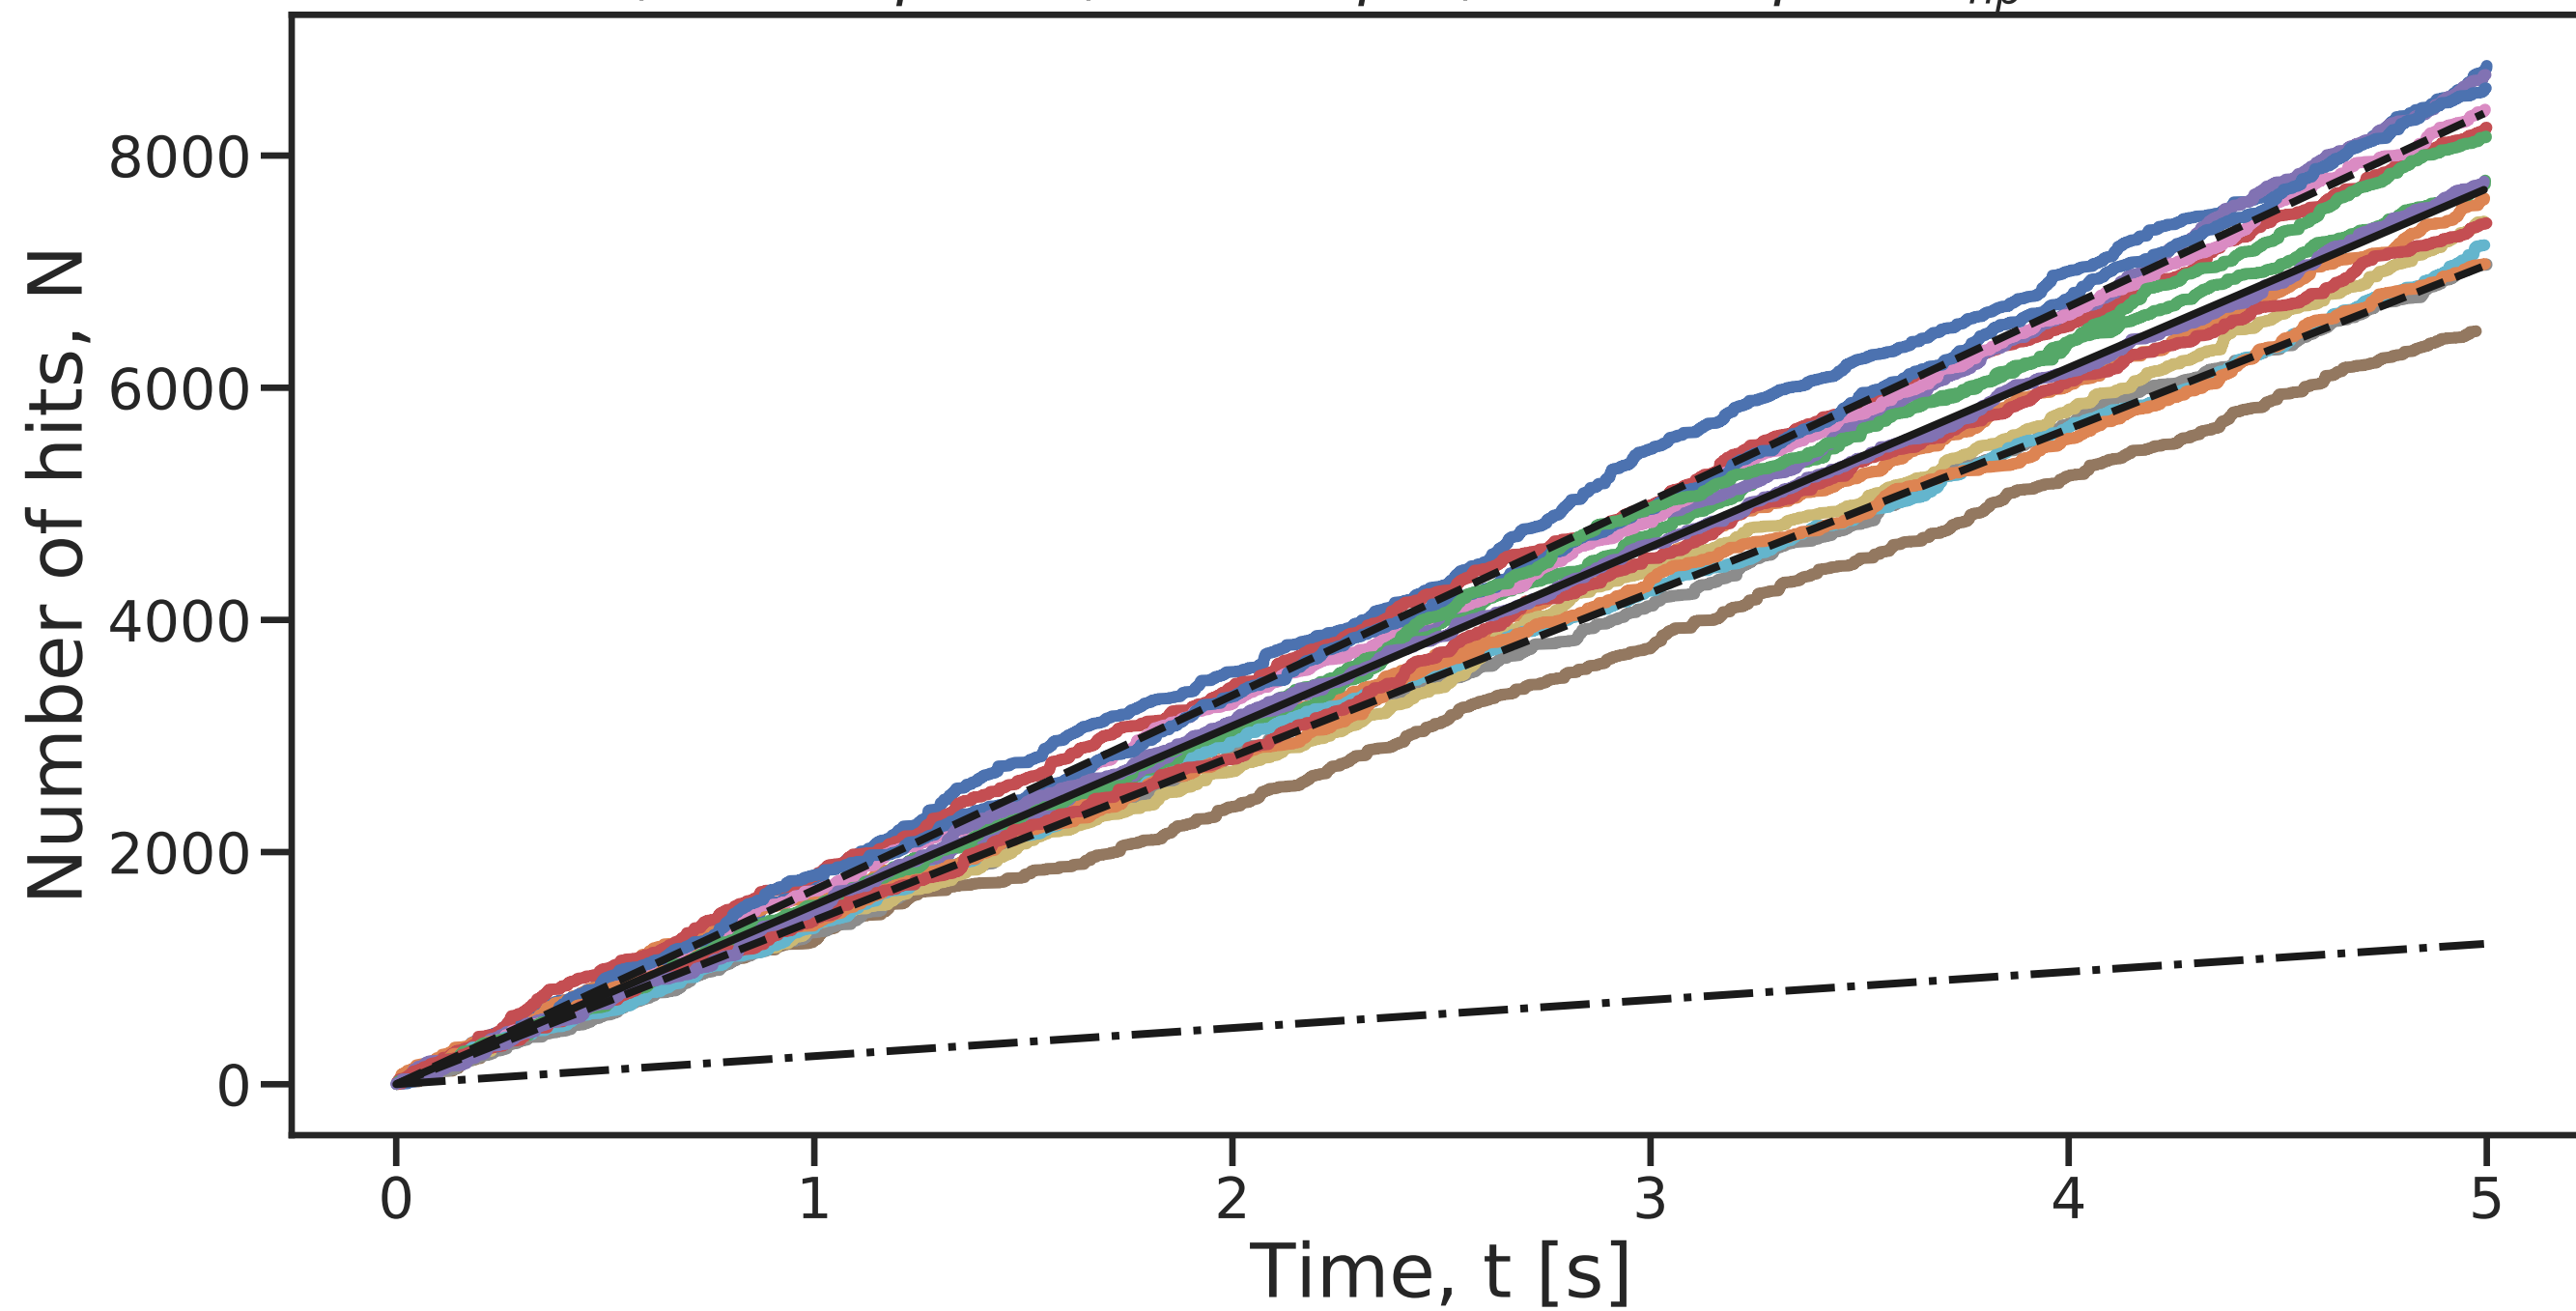

$c = 6.0 \text{ nM}; D = 80 \text{ } \mu\text{m}^2/\text{s}; R = 0.1 \text{ } \mu\text{m}; \Delta t = 1.0 \text{ } \mu\text{s} \langle N_{np} \rangle = 1843.2 \pm 94.9$

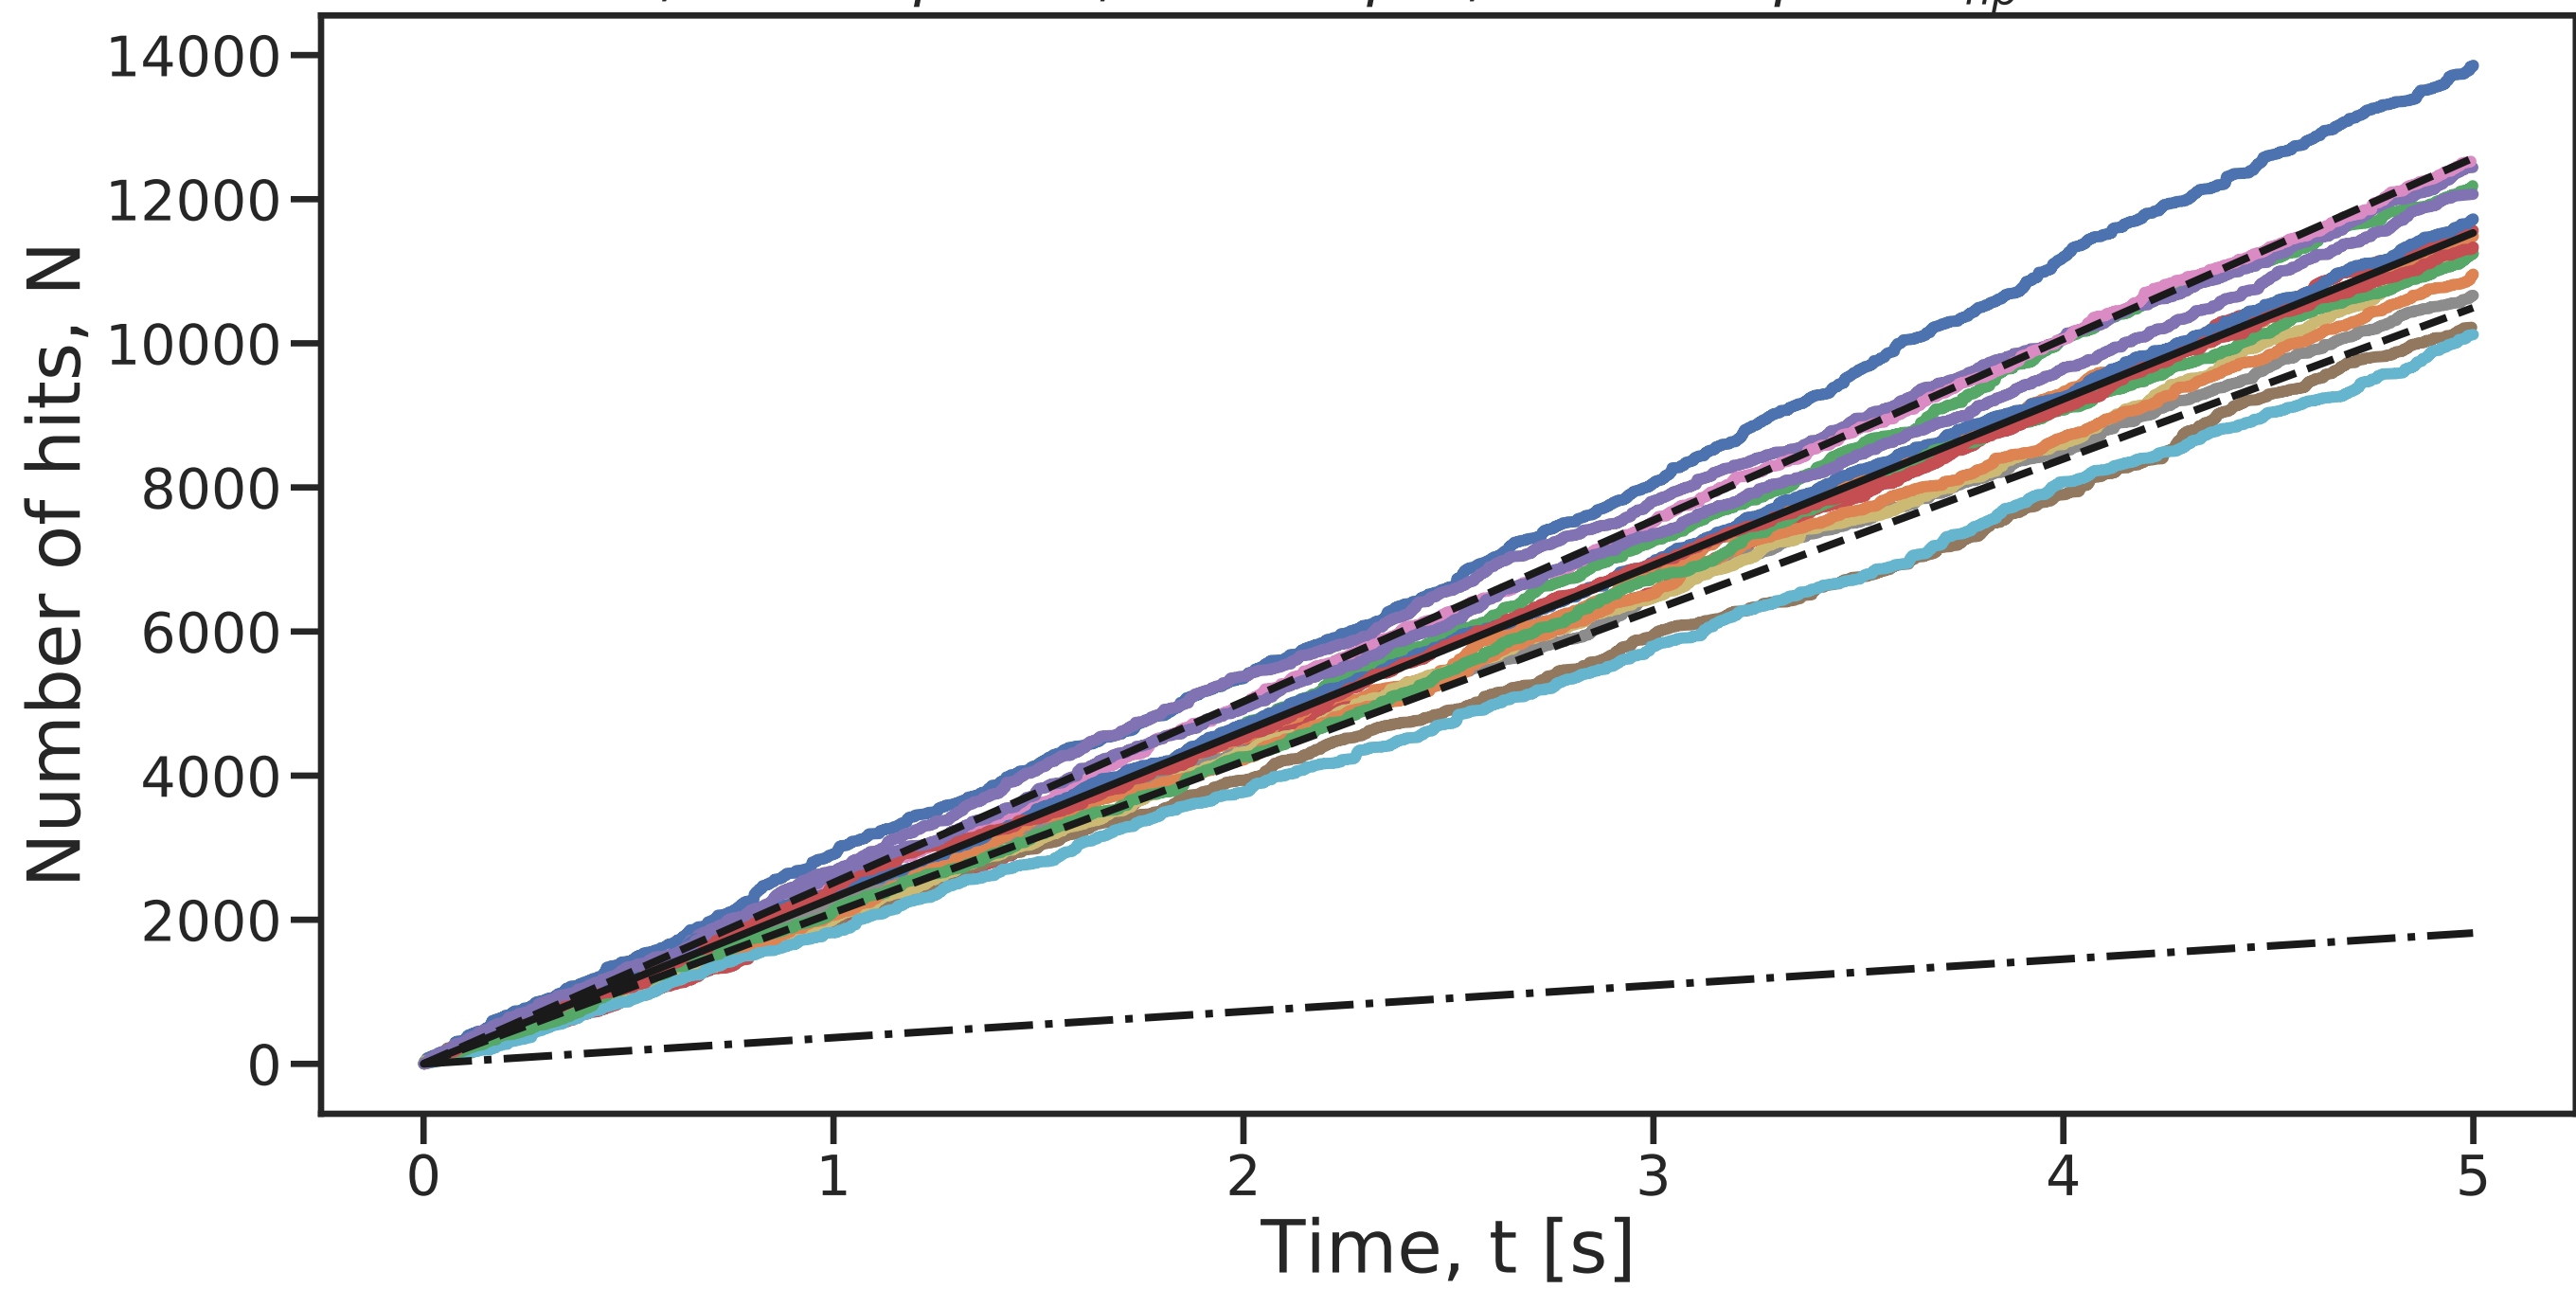

$c = 8.0 \text{ nM}$ ;  $D = 80 \text{ } \mu\text{m}^2/\text{s}$ ;  $R = 0.1 \text{ } \mu\text{m}$ ;  $\Delta t = 1.0 \text{ } \mu\text{s}$   $\langle N_{np} \rangle = 2396.2 \pm 117.4$

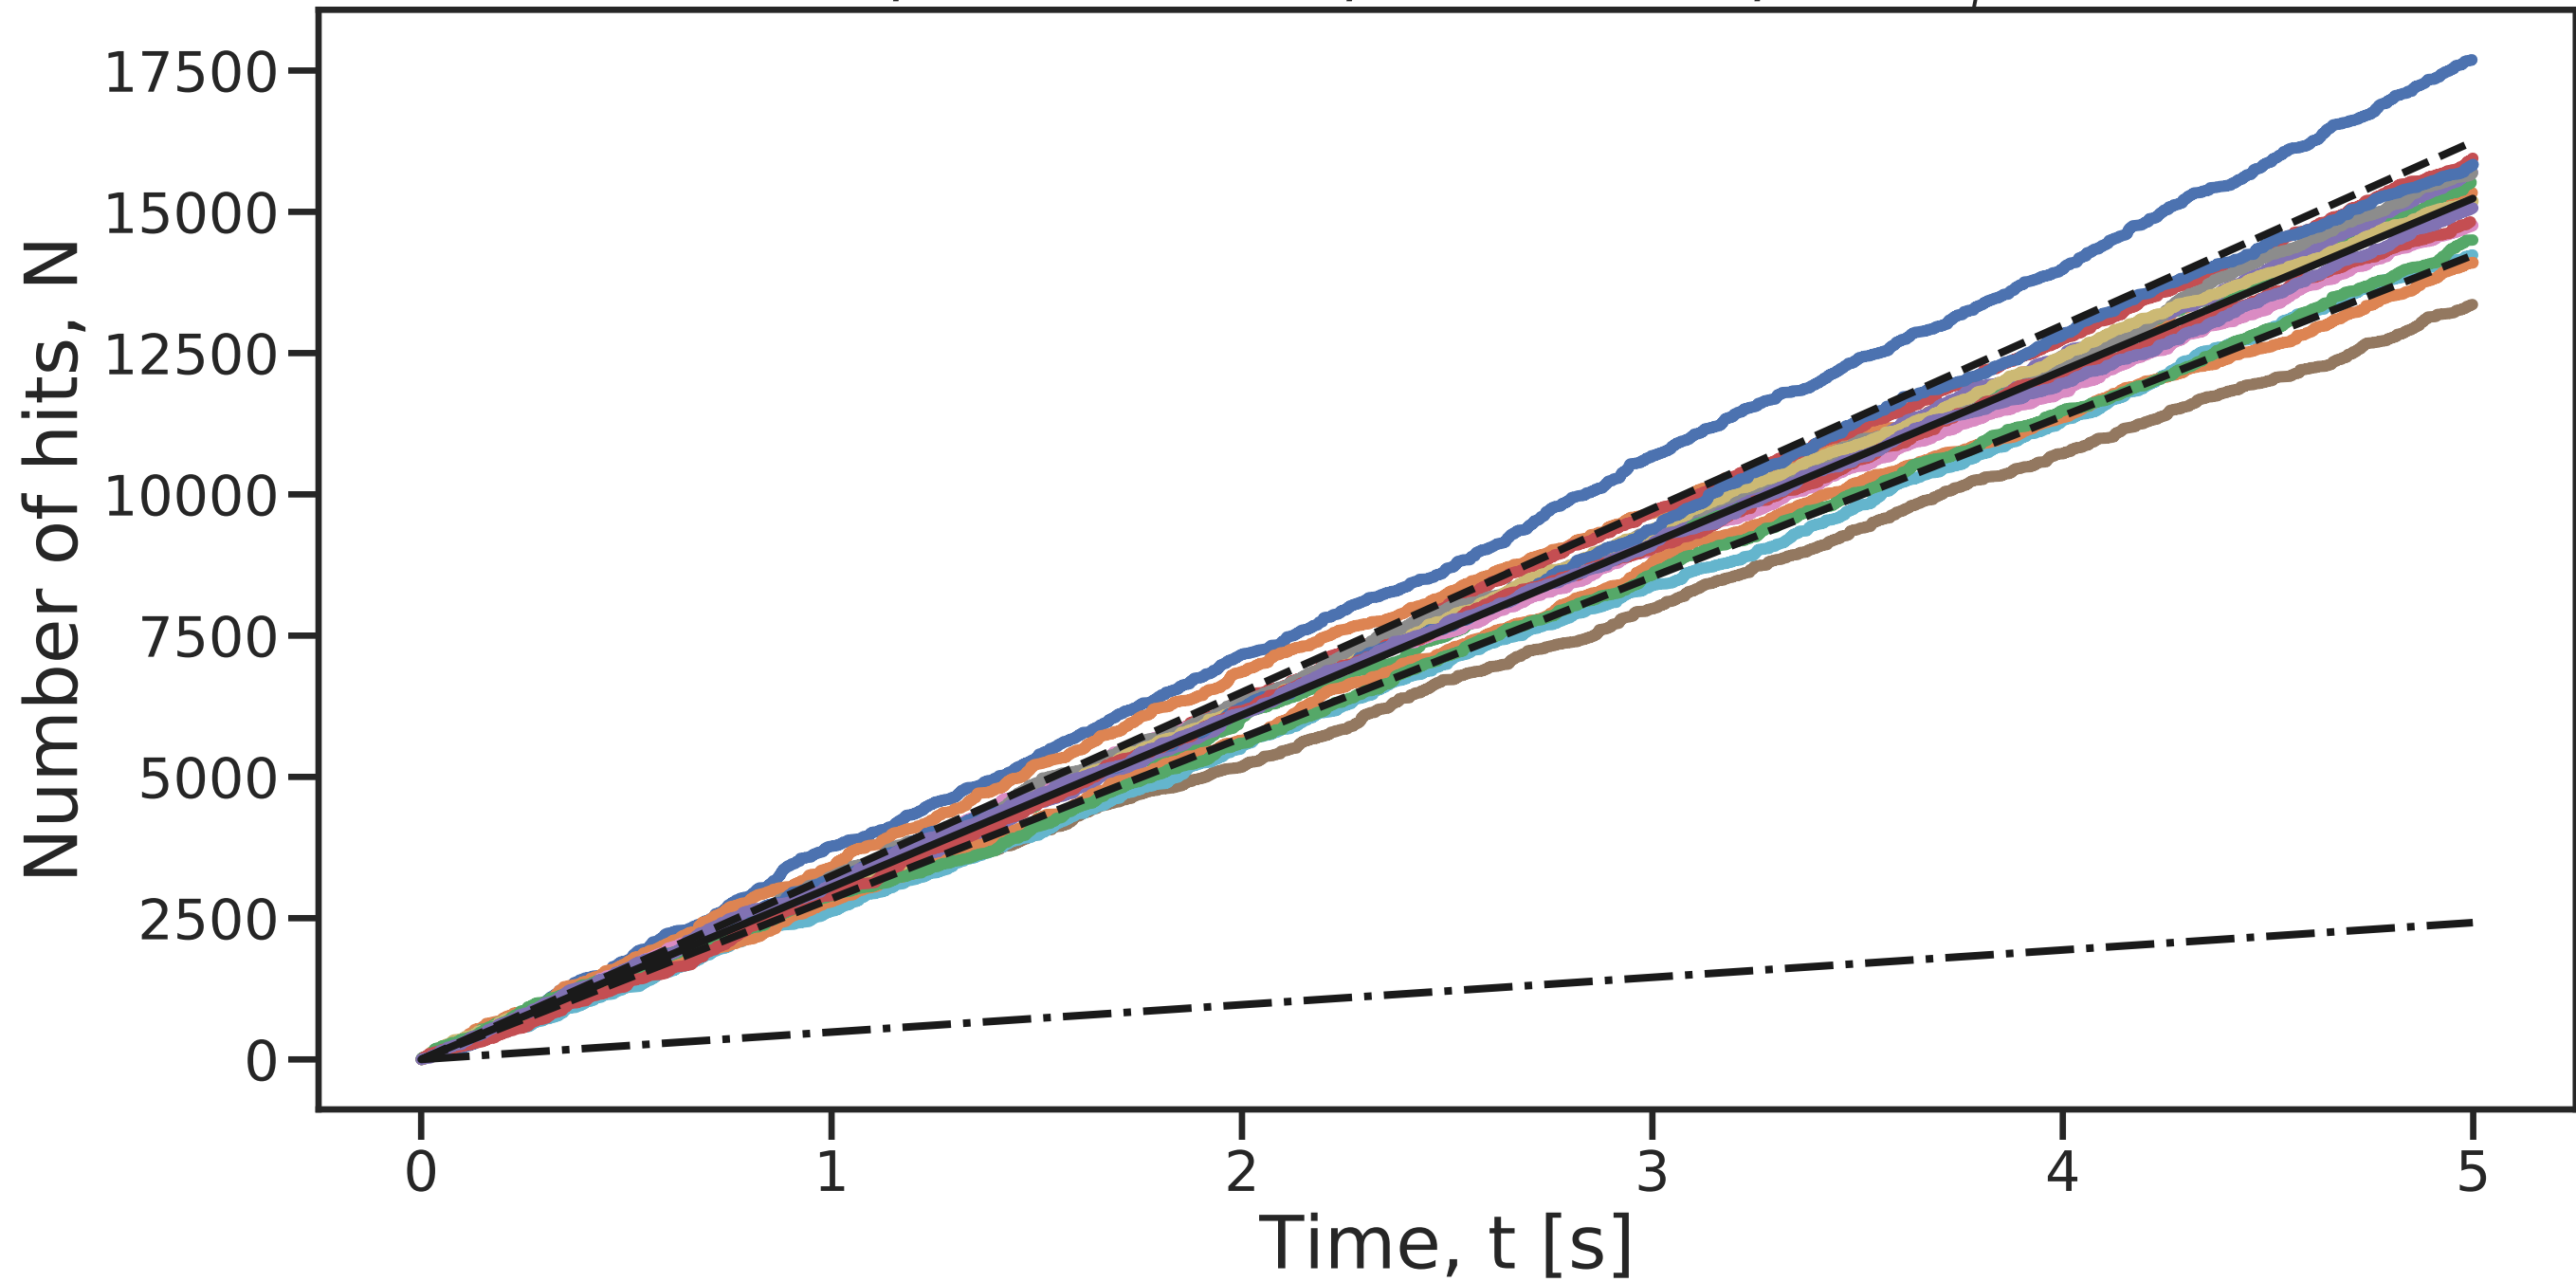

Supplement: d1cp02820k2.zip [file d1cp02820k2.zip]
